# Supplementary material for: Metabolic Basis for the Microbial Oxidation of Atmospheric Methane
Source: Research Square preprint supplement (doi:10.21203/rs.3.rs-3461927/v1), 2023-10-30
Supplement: Supplementary file 1 [file da59c7edde6588e8a726ea4f.xlsx]

## Sheet: S1 - Trace gas oxidation
Trace gas oxidation after six months of incubation with air as sole carbon and energy source (Fig. 1A)
	Incubation time [h]							H2 concentration in headspace [p.p.m.v.]							CH4 concentration in headspace [p.p.m.v.]							CO concentration in headspace [p.p.m.v.]
	t0	t1	t2	t3	t4	t5	t6	t0	t1	t2	t3	t4	t5	t6	t0	t1	t2	t3	t4	t5	t6	t0	t1	t2	t3	t4	t5	t6
NC	0	44	141	212.5	381.5	549.6	716.6	3.52055	3.5412	3.43776	3.44999	3.4322	3.37532	3.19051	3.413	3.50779	3.46698	3.49528	3.47023	3.45381	3.44018	3.61733	3.8905	3.85131	3.78225	3.7563	3.76898	3.82536
MG08 1	0	44	141	212.5	381.5	549.6	716.6	3.82847	2.27321	0.240111	0	0	0	0	3.43425	3.18703	2.60491	1.92012	0.961874	0.386238	0.034555	3.6792	3.10826	1.52462	1.00606	0	0	0
MG08 2	0	44	141	212.5	381.5	549.6	716.6	3.5035	2.09315	0.118911	0	0	0	0	3.3749	3.23666	2.74887	2.11869	1.19393	0.673935	0.276521	3.71649	3.35239	2.00634	1.34014	0.190016	0	0
MG08 3	0	44	141	212.5	381.5	549.6	716.6	3.63896	2.0467	0.169546	0	0	0	0	3.39513	3.30749	2.77061	2.44426	1.53164	0.911081	0.425736	3.71737	3.36369	2.28765	1.65653	0.397549	0	0
OB3o 1	0	44	141	212.5	716.6			3.52715	3.4287	3.65793	3.68706	3.32827			3.54388	3.42538	3.51726	3.57641	3.36954			3.67623	3.64727	3.95006	3.9899	3.75603
OB3o 2	0	44	141	212.5	716.6			3.70958	3.62433	3.49926	3.1447	3.48358			3.36915	3.44321	3.238	3.23083	3.39806			3.75013	3.66555	3.53137		3.86275
OB3o 3	0	44	141	212.5	716.6			3.53801	3.47246	3.51387	3.66403	3.28312			3.90416	3.59212	3.48289	3.57023	3.4501			3.76244	3.79256	3.73111	3.88411	3.84187
SV97 1	0	44	141	212.5	381.5	549.6	716.6	3.38107	3.09702	2.84487	2.80274	2.16559	1.705	1.10569	3.38496	3.15565	2.65185	2.04412	1.19409	0.595578	0.0880628	3.70975	3.35709	2.66893	2.1979	1.09585	0.509491	0
SV97 2	0	44	141	212.5	381.5	549.6	716.6	3.71119	3.37054	3.13098	2.83895	2.27712	1.72846	1.27377	3.46547	3.017	2.29923	1.62348	0.746795	0.181766	0.0304828	3.70586	3.2302	1.89059	1.36944	0.513211	0	0
B2 1	0	44	141	212.5	716.6			3.40271	3.47602	3.47852	3.48063	2.99519			3.45571	3.42392	3.45869	3.34187	3.33949			3.72482	3.91207	3.69967	3.83153	3.75704
B2 2	0	44	141	212.5	716.6			3.66671	3.6554	3.59038	3.61235	3.27724			3.41643	3.35423	3.35473	3.37764	3.28948			3.69754	3.65229	3.6432	3.74789	3.77617
B2 3	0	44	141	212.5	716.6			3.40963	3.25702	3.39256	3.4416	3.13899			3.35744	3.19448	3.242	3.27997	3.22437			3.74042	3.61419	3.73125	3.8532	3.83854
KYG 1	0	44	141	212.5	716.6			3.43987	3.21748	3.39127	3.25927	2.53081			3.45252	3.33582	3.17833	3.10498	1.9024			3.73016	3.6814	3.50442	3.50467	1.62368
KYG 2	0	44	141	212.5	716.6			3.64611	3.78721	3.48231	3.37803	2.53023			3.29821	3.4518	3.07123	2.97161	1.38614			3.7309	3.78082	3.22991	3.28469	1.10041
NE2 1	0	44	141	212.5	381.5	549.6	716.6	6.94373	6.6546	7.03205	6.74897	6.99762	6.96375	5.95157	3.35899	2.96297	2.25731	1.62541	0.69292	0.212675	0.0418383	3.72451	3.33453	2.38289	1.93364	0.921463	0.374007	0
NE2 2	0	44	141	212.5	381.5	549.6	716.6	3.8752	3.76714	3.61306	3.62927	3.72827	3.36085	3.20807	3.45876	2.94735	2.14741	1.45245	0.643284	0.111611	0.029587	3.67953	3.23383	1.94859	1.58166	0.739753	0.268727	0
NE2 3	0	44	141	212.5	381.5	549.6	716.6	3.52152	3.33575	3.42266	3.44633	4.01845	3.60559	3.26813	3.35618	2.93938	2.086	1.56527	0.685124	0.108589	0.0380687	3.66441	3.30402	2.20118	1.62623	0.808951	0.373036	0
Trace gas oxidation after 12 months of incubation with air as sole carbon and energy source (Supplementary Fig. 1)
	Incubation time [h]								H2 concentration in headspace [p.p.m.v.]								CH4 concentration in headspace [p.p.m.v.]								CO concentration in headspace [p.p.m.v.]
	t0	t1	t2	t3	t4	t5	t6	t7	t0	t1	t2	t3	t4	t5	t6	t7	t0	t1	t2	t3	t4	t5	t6	t7	t0	t1	t2	t3	t4	t5	t6	t7
MG08 1	0	25.1761	46.1092	75.5792	94.4772	121.455	218.069	558.525	3.66604	2.59725	1.91416	1.17779	0.856427	0.579343	0	0	3.40085	2.9643	2.85966	2.3932	2.27907	1.95373	1.1018	0.00766873	3.64165	3.16877	3.03759	2.52641	2.29011	1.76398	0.793438	0
MG08 2	0	25.1761	46.1092	75.5792	94.4772	121.455	218.069	558.525	3.43884	2.53926	1.71617	1.0862	0.739171	0.508012	0	0	3.4274	3.10922	2.91062	2.5943	2.58416	2.30011	1.53197	0.181653	3.71131	3.35382	3.06115	2.68147	2.56732	2.13068	1.10245	0
MG08 3	0	25.1797	46.1033	75.5697	94.5247	121.455	218.068	558.528	3.56698	2.29663	1.41597	0.899182	0.586982	0.289476	0	0	3.37064	3.19373	3.12794	2.92348	2.82806	2.67242	1.99686	0.391578	3.62284	3.26564	3.03426	2.70439	2.57958	2.2035	1.17498	0
MG08 4	0	25.1797	46.1033	75.5697	94.5247	121.455	218.068	558.528	3.49942	2.45245	1.65604	1.02079	0.708896	0.381298	0	0	3.35977	3.0784	2.86962	2.51011	2.37702	2.17015	1.35108	0.10735	3.66665	3.35416	3.02735	2.67356	2.49345	1.97282	1.06887	0
SV96 1	0	44.1408	93.7614	139.851	621.283				3.70502	3.85194	3.92162	3.85278	3.82221				3.38687	3.42884	3.41068	3.43167	3.57279				3.5051	3.67921	3.68146	3.63124	3.74626
SV96 2	0	44.1408	93.7614	139.851	621.283				3.51429	3.6324	3.55699	3.48246	3.63633				3.52291	3.52867	3.4306	3.45294	3.53943				3.67524	3.76614	3.77182	3.7921	3.92813
SV96 3	0	44.1486	93.7786	139.893	621.303				3.45655	3.56094	3.65578	3.64836	3.67858				3.25807	3.31881	3.40588	3.37222	3.45893				3.47704	3.56762	3.62714	3.73142	3.78565
SV96 4	0	44.1486	93.7786	139.893	621.303				3.46499	3.46275	3.66125	3.50868	3.49241				3.33347	3.38689	3.59762	3.40636	3.45215				3.57388	3.66889	3.81057	3.67799	3.82774
KYG 1	0	44.1572	93.8011	139.914	187.444	307.13	647.546		3.49837	3.3514	3.10425	2.57208	2.19528	1.17178	0		3.25348	3.10224	2.63929	2.24014	1.84964	1.16006	0.124801		3.55539	3.16345	2.65944	1.98397	1.52194	0.796022	0
KYG 2	0	44.1572	93.8011	139.914	187.444	307.13	647.546		3.2874	3.32005	3.12921	2.88648	2.6759	2.10649	0.669094		3.14001	3.21148	2.95849	2.72763	2.45349	1.73295	0.359539		3.44238	3.36659	3.0761	2.72711	2.32626	1.35768	0.164711
KYG 3	0	44.1806	93.8361	139.934	187.461	307.15	647.571		3.48631	3.27815	3.25496	3.01159	2.9016	2.31332	0.749707		3.3268	3.10416	2.98092	2.70909	2.44745	1.54416	0.100689		3.48708	3.21221	2.94875	2.5089	2.00565	0.898447	0
KYG 4	0	44.1806	93.8361	139.934	187.461	307.15	647.571		3.35013	3.36017	3.44383	3.23647	3.12292	2.69269	0.696396		3.1906	3.1214	2.9633	2.64477	2.41276	1.67671	0.454298		3.49299	3.3566	3.09752	2.6815	2.43958	1.45995	0.410869
NC 1	0	44.2028	93.8639	139.963	187.494	307.178	647.606		3.47716	3.46946	3.77523	3.66624	3.54762	3.44162	3.52978		3.42785	3.29508	3.44541	3.43911	3.30831	3.43095	3.40946		3.52013	3.64527	3.86045	3.85977	3.63549	3.75755	3.90282
NC 2	0	44.2192	93.8861	139.987	187.089	306.773	647.201		3.50482	3.50955	3.70652	3.58568	3.47781	3.51467	3.44935		3.43165	3.24174	3.33487	3.29581	3.32512	3.3851	3.33207		3.68856	3.62087	3.87712	3.76583	3.73595	3.88563	3.78031
B2 1	0	45.3183	91.8958	142.299	596.836				3.74319	3.72009	3.8397	3.72935	3.71164				6.79621	6.67012	6.94869	6.59392	6.76389				3.63449	3.68624	3.86368	3.81915	3.91512
B2 2	0	45.3183	91.8958	142.299	596.836				3.53598	3.56583	3.60978	3.40428	3.45649				3.29452	3.46681	3.39793	3.25486	3.38447				3.67637	3.6786	3.79718	3.68909	3.79313
B2 3	0	45.3408	91.9322	142.329	596.866				3.66059	3.52167	3.60447	3.54076	3.42428				3.33336	3.35548	3.4366	3.2593	3.32931				3.67636	3.64112	3.67929	3.69295	3.77219
B2 4	0	45.3408	91.9322	142.329	596.866				3.52153	3.46533	3.56717	3.51863	3.51826				3.2587	3.32387	3.38955	3.35348	3.51631				3.622	3.64795	3.78099	3.80923	3.98211
OB3o 1	0	45.3536	91.9636	142.351	596.891				3.60269	3.46029	3.65667	3.65442	3.46823				3.34402	3.23782	3.44313	3.33045	3.38757				3.57829	3.51995	3.66896	3.71651	3.64583
OB3o 2	0	45.3536	91.9636	142.351	596.891				3.60042	3.65285	3.66849	3.56816	3.55369				3.4213	3.57039	3.50932	3.42724	3.47981				3.67721	3.79176	3.76887	3.80931	3.85061
OB3o 3	0	45.3775	91.9892	142.381	596.916				3.58709	3.71748	3.64023	3.57603	2.94383				3.28448	3.4854	3.31977	3.27632	2.87928				3.51658	3.67033	3.60345	3.56908	2.77061
OB3o 4	0		91.9892	142.381	596.916				3.58724		3.59816	3.70056	3.62651				3.33248		3.41826	3.40854	3.45288				3.60433		3.78041	3.7966	3.95766
NE2 1	0	45.3872	92.0144	142.416	188.318	284.903	625.336		3.6945	3.79491	3.90401	3.78945	3.76666	3.69492	3.57532		3.36345	2.86662	2.0904	1.33024	0.923766	0.210404	0.0222872		3.59274	2.80853	1.64258	0.877828	0.431822	0.0709071	0
NE2 2	0	45.3872	92.0144	142.416	188.318	284.903	625.336		3.56164	3.66503	3.70348	3.66268	3.6825	3.53	3.50177		3.27926	3.32702	3.05873	2.92123	2.80505	2.42914	1.46017		3.69271	3.69445	3.509	3.3211	3.26046	2.87894	1.95068
NE2 3	0	45.3972	92.0306	142.441	188.33	284.916	625.365		3.65731	3.72992	3.62579	3.76119	3.76863	3.72012	3.59027		3.26971	3.17818	2.70141	2.46307	2.1212	1.44716	0.0804233		3.49621	3.22947	2.73294	2.46939	1.99646	1.18729	0.10238
NE2 4	0	45.3972	92.0306	142.441	188.33	284.916	625.365		3.53681	3.62049	3.59882	3.60663	3.52096	3.54666	3.43464		3.21133	3.26186	2.85947	2.62964	2.42759	1.73212	0.130725		3.66998	3.46706	3.1702	2.84413	2.55461	1.73017	0.284569
SV97 1	0	45.4147	92.0514	142.459	188.346	284.942	625.391		3.47614	2.39073	1.22696	0.650916	0.209446	0.0962752	0		3.28686	2.71808	1.87466	1.20367	0.795486	0.288052	0.0228096		3.5315	2.74217	1.62425	0.922092	0.518475	0.115711	0
SV97 2	0	45.4147	92.0514	142.459	188.346	284.942	625.391		3.5348	3.09553	2.63941	2.17126	1.68474	1.13403	0		3.26748	2.91237	2.15783	1.56259	1.09522	0.439248	0.0555307		3.49698	2.74381	1.78923	0.974608	0.498884	0.0834777	0
SV97 3	0	45.4269	92.0686	142.472	188.35	284.954	625.41		3.56857	3.0789	2.5976	2.16398	1.64166	1.09321	0		3.27796	2.80662	2.25715	1.65849	1.16784	0.518061	0.0219247		3.50227	2.85454	1.98388	1.21941	0.732757	0.193678	0
SV97 4	0	45.4269	92.0686	142.472	188.35	284.954	625.41		3.41067	3.03189	2.54698	2.06478	1.6043	1.16726	0		6.20241	5.38098	4.46849	3.40512	2.71092	1.37029	0.167489		3.45054	2.81188	1.89531	1.11721	0.658694	0.159309	0
Trace gas oxidation of MG08 after 12 months of incubation with air as sole carbon, energy, and nitrogen source (Fig. 5B)
	Incubation time [h]					H2 concentration in headspace [p.p.m.v.]					CH4 concentration in headspace [p.p.m.v.]					CO concentration in headspace [p.p.m.v.]
	t0	t1	t2	t3	t4	t0	t1	t2	t3	t4	t0	t1	t2	t3	t4	t0	t1	t2	t3	t4
NC	0	23.7333	71.7333	143.717	239.733	2.5	2.508	2.464	2.06	2.036	2.788	2.683	2.548	2.5	2.468	2.31	2.079	1.829	1.664	1.561
MG08 1	0	23.7333	71.7333	143.717	239.733	2.5	1.717	1.179	0.959	0.82	2.807	2.652	2.486	2.429	2.341	2.214	1.781	1.505	1.215	0.941
MG08 2	0	23.7333	71.7333	143.717	239.733	2.5	1.772	1.427	1.088	0.802	2.784	2.692	2.575	2.451	2.377	2.248	2.004	1.714	1.376	1.164
MG08 3	0	23.7333	71.7333	143.717	239.733	2.5	1.975	1.304	0.811	0.782	2.779	2.662	2.537	2.439	2.325	2.289	1.979	1.663	1.315	1.135
MG08 4	0	23.7333	71.7333	143.717	239.733	2.5	2.086	1.348	0.758	0.682	2.764	2.646	2.537	2.4	2.294	2.211	1.876	1.489	1.197	0.948

## Sheet: S2 - Cellular oxidation rate
Cellular oxidation rates of M. aurea KYG, M. gorgona MG08, M. palsarum NE2, and M. rosea SV97 at atmospheric concentrations of CH4, H2, and CO
	Amount of substance in headspace [mol]							Incubation time [h]
	t0	t1	t3	t4	t5	t7	t0	t1	t3	t4	t5	t7	Cells per culture
MG08 1	0.0112629	0.0110888	0.0109173	0.0107485	0.0106648	0.0105817	0	26.1167	52.9833	170.367	287.283	451.233	9.53251e+06
MG08 2	0.011234	0.0111465	0.0110597	0.0108887	0.0108038	0.0107196	0	26.1167	52.9833	170.367	287.267	451.233	1.29477e+07
MG08 3	0.0112452	0.0111575	0.0110706	0.0108994	0.0108145	0.0107303	0	26.1167	52.9833	170.367	287.283	451.25	8.7843e+06
MG08 4	0.0111117	0.0110251	0.0109392	0.0107701	0.0106862	0.0106029	0	25.8167	52.6667	170.083	286.983	451.15	7.96944e+06
MG08 5	0.0112785	0.0111907	0.0111035	0.0109318	0.0108466	0.0107621	0	25.9333	52.8	170.217	287.083	451.067	6.7451e+06
KYG 1	0.0112563	0.0111686	0.0110816	0.0109102	0.0108252	0.0107409	0	25.9333	52.7833	170.2	287.1	451.25	8.6749e+06
KYG 2	0.0111339	0.0110472	0.0109611	0.0107916	0.0107075	0.0106241	0	25.9333	52.7833	170.217	287.117	451.267	9.70748e+06
KYG 3	0.011234	0.0111465	0.0110597	0.0108887	0.0108038	0.0107196	0	25.9333	52.8	170.217	287.117	451.283	2.12953e+06
KYG 4		0.0105064	0.0104246	0.0102634	0.0101834	0.0101041		0	52.8	170.217	287.117	451.283	7.01854e+06
KYG 5	0.0112674	0.0111796	0.0110925	0.010921	0.0108359	0.0107515	0	25.8333	52.6667	170.083	286.983	451.15	1.41024e+06
NE2 1	0.0112229	0.0111355	0.0110487	0.0108779	0.0107931	0.010709	0	27.8333	52	169.917	295.083	459.283	1.20215e+07
NE2 2	0.0113341	0.0112458	0.0111582	0.0109857	0.0109001	0.0108152	0	27.85	52.0167	169.933	295.1	459.283	1.29402e+07
NE2 3	0.0113216	0.0112334	0.0111458	0.0109735	0.010888	0.0107196	0	28.2167	52	169.917	295.083	459.283	1.33408e+07
NE2 4	0.0113008	0.0112127	0.0111254	0.0109533	0.010868	0.0107833	0	28.25	52.0167	169.933	295.1	459.483	1.68653e+07
NE2 5	0.011412	0.0113231	0.0112349	0.0110612	0.010975	0.0108895	0	28.2833	52.0167	169.933	295.117	459.5	1.33607e+07
SV97 1	0.0113786	0.01129	0.011202	0.0110288	0.0109429	0.0108576	0	28.3	52	169.933	295.1	458.1	1.13502e+07
SV97 2	0.0112674	0.0111796	0.0110925	0.010921	0.0108359	0.0107515	0	28.3333	52.0167	169.95	295.117	459.3	2.18889e+07
SV97 3	0.0113786	0.01129	0.011202	0.0110288	0.0109429	0.0108576	0	28.3333	52	169.95	295.1	459.3	6.18199e+06
SV97 4	0.0113675	0.0112789	0.0111911	0.011018	0.0109322	0.010847	0	28.3333	52.0167	169.95	295.117	459.317	1.44469e+07
SV97 5	0.0111006	0.0110141	0.0109283	0.0107593	0.0106755	0.0105923	0	28.3333	52	169.967	295.1	459.317	1.23912e+07
	CH4 concentration in headspace [p.p.m.v.]						Amount of substance CH4 [µmol]						Natural logarithm of amount of substance (CH4)
	t0	t1	t3	t4	t5	t7	t0	t1	t3	t4	t5	t7	t0	t1	t3	t4	t5	t7	Slope (ln over time)	R2	Average R2	CH4 oxidation rate culture [µmol hour-1] at 1.869 ppm	CH4 oxidation rate per cell [µmol cell-1 hour-1]	Average CH4 oxidation rate per cell [µmol cell-1 h-1]	STD
MG08 1	3.463	3.488	3.431	3.133	2.922	2.791	0.0390035	0.0386776	0.0374573	0.0336751	0.0311624	0.0295334	-3.2441	-3.25249	-3.28455	-3.391	-3.46854	-3.52223	-0.000656409	0.963612		1.29863e-05	1.36231e-12	1.93685e-12	4.32762e-13
MG08 2	3.226	3.261	2.992	2.693	2.209	1.728	0.036241	0.0363488	0.0330905	0.0293232	0.0238656	0.0185235	-3.31756	-3.31459	-3.40851	-3.52938	-3.73532	-3.98871	-0.00150681	0.992797		2.98105e-05	2.30239e-12
MG08 3	3.467	3.538	3.255	3.041	2.794	2.658	0.038987	0.0394754	0.0360349	0.0331452	0.0302158	0.028521	-3.24453	-3.23208	-3.32327	-3.40686	-3.49939	-3.55711	-0.000735271	0.939575		1.45465e-05	1.65596e-12
MG08 4	3.453	3.533	3.328	3.164	2.815	2.577	0.0383687	0.0389517	0.0364057	0.0340765	0.0300815	0.0273237	-3.26051	-3.24543	-3.31303	-3.37915	-3.50384	-3.6	-0.000795096	0.981015		1.573e-05	1.97379e-12
MG08 5	3.639	3.618	3.454	3.138	2.821	2.695	0.0410426	0.0404878	0.0383514	0.0343039	0.0305983	0.0290038	-3.19315	-3.20675	-3.26096	-3.3725	-3.48681	-3.54033	-0.000814778	0.956303	0.966661	1.61194e-05	2.3898e-12
KYG 1	3.328	3.355	2.976	2.662	1.961	1.425	0.0374609	0.0374706	0.0329787	0.029043	0.0212282	0.0153057	-3.28446	-3.2842	-3.41189	-3.53898	-3.85242	-4.17953	-0.00200898	0.987697		3.97453e-05	4.58164e-12	7.27567e-12	3.62391e-12
KYG 2	3.378	3.3	3.034	2.549	1.948	1.567	0.0376104	0.0364557	0.033256	0.0275079	0.0208583	0.016648	-3.28047	-3.31166	-3.40352	-3.59328	-3.87	-4.09547	-0.00185602	0.991902		3.67191e-05	3.78256e-12
KYG 3	3.35	3.454	3.224	2.98	2.585	2.211	0.037634	0.0385001	0.0356564	0.0324482	0.0279279	0.0237011	-3.27985	-3.2571	-3.33383	-3.42811	-3.57813	-3.74223	-0.00107078	0.989226		2.1184e-05	9.94778e-12
KYG 4		3.589	3.018	2.489	1.679	1.496	0	0.0377075	0.0314613	0.0255455	0.0170979	0.0151157		-3.2779	-3.459	-3.66729	-4.0688	-4.19202	-0.00208971	0.952084		4.13424e-05	5.89045e-12
KYG 5	3.533	3.471	3.334	3.124	2.873	2.469	0.0398078	0.0388045	0.0369825	0.0341172	0.0311316	0.0265454	-3.22369	-3.24922	-3.29731	-3.37795	-3.46953	-3.6289	-0.000867931	0.994547	0.983091	1.7171e-05	1.21759e-11
NE2 1	3.155	3.079	2.853	2.122	1.572	1.369	0.0354083	0.0342861	0.031522	0.0230829	0.0169668	0.0146607	-3.34081	-3.37301	-3.45707	-3.76867	-4.0765	-4.22259	-0.00206119	0.965514		4.07782e-05	3.39211e-12	3.67608e-12	3.39096e-13
NE2 2	3.281	3.027	2.9	2.169	1.62	1.121	0.0371873	0.0340412	0.0323588	0.023828	0.0176581	0.0121238	-3.29179	-3.38019	-3.43087	-3.7369	-4.03656	-4.41258	-0.00243399	0.999158		4.81536e-05	3.72125e-12
NE2 3	3.198	2.998	2.7	1.991	1.446	0.894	0.0362064	0.0336776	0.0300938	0.0218482	0.015744	0.00958336	-3.31852	-3.39092	-3.50344	-3.82364	-4.15129	-4.64773	-0.00286104	0.998742		5.66024e-05	4.24279e-12
NE2 4	3.239	2.985	2.726	1.929	1.366	0.866	0.0366032	0.03347	0.0303278	0.021129	0.0148457	0.00933836	-3.30762	-3.39711	-3.49569	-3.85711	-4.21005	-4.67362	-0.00296485	0.998758		5.8656e-05	3.4779e-12
NE2 5	3.225	3.043	2.783	2.119	1.597	1.126	0.0368037	0.0344562	0.0312666	0.0234386	0.017527	0.0122615	-3.30216	-3.36807	-3.4652	-3.75337	-4.04401	-4.40129	-0.00239497	0.997341	0.991902	4.73817e-05	3.54635e-12
SV97 1	3.385	3.074	2.815	2.204	1.83	0.897	0.0385167	0.0347054	0.0315337	0.0243075	0.0200255	0.00973928	-3.25666	-3.36086	-3.4567	-3.71697	-3.91075	-4.63159	-0.00276924	0.96736		5.4786e-05	4.82687e-12	4.30817e-12	1.71385e-12
SV97 2	3.27	3.096	2.948	2.276	1.833	1.145	0.0368444	0.0346121	0.0327007	0.0248562	0.0198622	0.0123104	-3.30105	-3.36355	-3.42036	-3.69465	-3.91894	-4.39731	-0.00232638	0.994199		4.60246e-05	2.10264e-12
SV97 3	3.163	3.025	2.791	2.174	1.942	1.185	0.0359906	0.0341522	0.0312648	0.0239766	0.0212511	0.0128663	-3.3245	-3.37693	-3.46526	-3.73068	-3.85135	-4.35315	-0.00212665	0.978973		4.20732e-05	6.80577e-12
SV97 4	3.229	3.081	2.724	2.01	1.485	0.961	0.0367057	0.0347504	0.0304845	0.0221462	0.0162343	0.010424	-3.30482	-3.35956	-3.49054	-3.81009	-4.12063	-4.56365	-0.0027357	0.99733		5.41225e-05	3.74632e-12
SV97 5	3.381	3.383	2.944	2.225	1.664	1.126	0.037531	0.0372606	0.0321728	0.0239394	0.017764	0.0119269	-3.28259	-3.28982	-3.43663	-3.73223	-4.03058	-4.42896	-0.00254242	0.995212	0.986615	5.02988e-05	4.05924e-12
	H2 concentration [ppm]						Amount of substance H2 [µmol]						Natural logarithm of amount of substance (H2)
	t0	t1	t3	t4	t5	t7	t0	t1	t3	t4	t5	t7	t0	t1	t3	t4	t5	t7	Slope (ln over time)	R2	Average R2	H2 oxidation rate culture [µmol hour-1] at 1.869 ppm	H2 oxidation rate per cell [µmol cell-1 hour-1]	Average H2 oxidation rate per cell [µmol cell-1 h-1]	STD
MG08 1	3.183	2.798	2.065	1.335	0.818	0.485	0.0358499	0.0310264	0.0225443	0.0143493	0.00872377	0.00513211	-3.32841	-3.47292	-3.79228	-4.24406	-4.7417	-5.27224	-0.00425547	0.980933		2.25226e-05	2.36271e-12	2.95713e-12	5.73374e-13
MG08 2	3.112	2.69	1.812	1.077	0.467	0.161	0.0349603	0.0299841	0.0200401	0.0117271	0.00504538	0.00172586	-3.35354	-3.50709	-3.91002	-4.44585	-5.28928	-6.36203	-0.00655451	0.994388		3.46905e-05	2.67929e-12
MG08 3	3.259	2.812	2.037	1.357	0.746	0.323	0.036648	0.031375	0.0225508	0.0147905	0.00806763	0.00346587	-3.3064	-3.46174	-3.79198	-4.21377	-4.8199	-5.66479	-0.0050703	0.992681		2.68351e-05	3.0549e-12
MG08 4	3.483	3.093	2.458	1.655	0.933	0.541	0.038702	0.0341007	0.0268886	0.0178245	0.00997018	0.00573617	-3.25186	-3.37844	-3.61605	-4.02718	-4.60816	-5.16096	-0.00422842	0.992049		2.23794e-05	2.80815e-12
MG08 5	3.266	2.856	2.179	1.446	0.812	0.345	0.0368357	0.0319605	0.0241945	0.0158074	0.00880744	0.00371292	-3.30129	-3.44325	-3.72163	-4.14728	-4.73216	-5.59594	-0.00494554	0.994998	0.99101	2.61749e-05	3.88057e-12
KYG 1	3.172	2.744	1.978	1.233	0.641	0.283	0.0357049	0.0306466	0.0219193	0.0134523	0.00693896	0.00303967	-3.33247	-3.48523	-3.82039	-4.30861	-4.9706	-5.79601	-0.00536363	0.993844		2.83876e-05	3.27239e-12	3.38004e-12	5.03319e-13
KYG 2	3.245	2.781	2.033	1.297	0.699	0.318	0.0361296	0.0307222	0.0222839	0.0139967	0.00748458	0.00337847	-3.32064	-3.48277	-3.80389	-4.26893	-4.89491	-5.69033	-0.0051348	0.993325		2.71766e-05	2.79955e-12
KYG 3	3.238	3.229	3.079	2.687	2.174	1.927	0.0363758	0.0359921	0.0340527	0.0292578	0.0234875	0.0206567	-3.31385	-3.32446	-3.37985	-3.53161	-3.75129	-3.87971	-0.00133447	0.982717		7.06287e-06	3.31664e-12
KYG 4		2.689	1.683	0.864	0.352	0.435		0.0282518	0.0175445	0.00886755	0.00358456	0.00439527		-3.5666	-4.04301	-4.72536	-5.63112	-5.42723	-0.00440384	0.829202		2.33079e-05	3.3209e-12
KYG 5	3.226	3.171	3.049	2.754	2.118	2.161	0.0363487	0.0354506	0.0338211	0.0300764	0.0229505	0.023234	-3.3146	-3.33962	-3.38667	-3.50401	-3.77442	-3.76214	-0.00111664	0.901044	0.940026	5.90997e-06	4.19075e-12
NE2 1	3.429	3.402	3.266	3.26	3.127	2.567	0.0384834	0.0378829	0.0360851	0.0354619	0.0337501	0.0274901
NE2 2	3.393	3.386	3.341	3.379	3.376	3.094	0.0384568	0.0380784	0.0372796	0.0371206	0.0367987	0.0334621
NE2 3	3.411	3.338	3.258	3.271	3.163	2.883	0.0386179	0.037497	0.0363131	0.0358943	0.0344387	0.0309047
NE2 4	3.394	3.419	3.379	3.424	3.395	3.224	0.0383548	0.0383363	0.0375926	0.0375042	0.0368969	0.0347654
NE2 5	3.336	3.382	3.311	3.413	3.415	3.233	0.0380705	0.0382947	0.0371987	0.0377517	0.0374795	0.0352056
SV97 1	3.337	3.148	2.656	2.237	1.754	1.011	0.0379705	0.0355409	0.0297526	0.0246714	0.0191938	0.0109771	-3.27095	-3.33707	-3.51484	-3.70211	-3.95317	-4.51195	-0.0025513	0.980586		1.35031e-05	1.18967e-12	1.19582e-12	5.19772e-13
SV97 2	3.296	3.158	2.669	2.298	1.72	1.046	0.0371374	0.0353052	0.0296059	0.0250965	0.0186378	0.0112461	-3.29313	-3.34372	-3.51978	-3.68503	-3.98257	-4.48774	-0.00249345	0.985319		1.31969e-05	6.02901e-13
SV97 3	3.286	3.1	2.743	2.402	1.822	1.093	0.0373902	0.0349989	0.0307271	0.0264912	0.0199379	0.0118674	-3.28635	-3.35244	-3.48261	-3.63094	-3.91513	-4.43396	-0.00236877	0.98146		1.2537e-05	2.02799e-12
SV97 4	3.364	3.098	2.613	2.219	1.578	0.932	0.0382403	0.0349422	0.0292423	0.024449	0.017251	0.0101094	-3.26386	-3.35406	-3.53214	-3.71117	-4.05989	-4.59429	-0.0027589	0.987031		1.46018e-05	1.01073e-12
SV97 5	3.351	3.124	2.657	2.272	1.63	0.964	0.037198	0.034408	0.0290364	0.0244451	0.017401	0.010211	-3.2915	-3.36947	-3.53921	-3.71133	-4.05123	-4.58429	-0.00268733	0.986568	0.984193	1.4223e-05	1.14783e-12
	CO concentration [ppm]						Amount of substance CO [µmol]						Natural logarithm of amount of substance (CO)
	t0	t1	t3	t4	t5	t7	t0	t1	t3	t4	t5	t7	t0	t1	t3	t4	t5	t7	Slope (ln over time)	R2	Average R2	CO oxidation rate culture [µmol hour-1] at 1.869 ppm	CO oxidation rate per cell [µmol cell-1 hour-1]	Average CO oxidation rate per cell [µmol cell-1 h-1]	STD
MG08 1	3.587	3.462	3.264	2.956	2.576	2.394	0.0404001	0.0383893	0.0356341	0.0317726	0.0274724	0.0253325	-3.20892	-3.25998	-3.33445	-3.44915	-3.59457	-3.67567	-0.00103429	0.957985		2.18964e-06	2.29702e-13	3.02307e-13	7.62696e-14
MG08 2	3.522	3.196	3.006	2.606	1.969	1.294	0.0395663	0.0356243	0.0332454	0.0283758	0.0212727	0.0138712	-3.22978	-3.33473	-3.40384	-3.56222	-3.85033	-4.27794	-0.00220798	0.988743		4.6744e-06	3.61023e-13
MG08 3	3.796	3.949	3.554	3.37	3.324	2.532	0.0426866	0.0440612	0.039345	0.0367311	0.0359475	0.027169	-3.15387	-3.12218	-3.23539	-3.30413	-3.3257	-3.60568	-0.000940452	0.914855		1.99098e-06	2.26652e-13
MG08 4	3.376	3.17	3.105	2.73	2.394	1.729	0.0375131	0.0349496	0.0339663	0.0294023	0.0255827	0.0183324	-3.28307	-3.35385	-3.38239	-3.52668	-3.66584	-3.99909	-0.00149128	0.985219		3.15712e-06	3.96153e-13
MG08 5	3.76	3.651	3.394	3.168	2.995	2.481	0.0424073	0.0408571	0.0376852	0.0346319	0.0324856	0.0267008	-3.16044	-3.19767	-3.27849	-3.36298	-3.42696	-3.62306	-0.000949464	0.972826	0.963926	2.01006e-06	2.98003e-13
KYG 1	3.354	3.018	2.391	1.695	1.084	0.603	0.0377536	0.0337068	0.026496	0.0184928	0.0117345	0.00647674	-3.27667	-3.39006	-3.63076	-3.99037	-4.44522	-5.03954	-0.00382862	0.993591		8.10538e-06	9.34348e-13	1.7564e-12	1.05294e-12
KYG 2	3.71	3.248	2.704	2.073	1.289	0.745	0.0413069	0.0358813	0.0296389	0.022371	0.013802	0.00791497	-3.18673	-3.32754	-3.51867	-3.79999	-4.28294	-4.839	-0.00355629	0.993106		7.52884e-06	7.75571e-13
KYG 3	3.47	3.282	2.888	2.307	1.795	1.088	0.0389821	0.0365829	0.0319403	0.0251201	0.0193929	0.011663	-3.24465	-3.30818	-3.44389	-3.68409	-3.94285	-4.45134	-0.00258232	0.993324		5.46689e-06	2.56719e-12
KYG 4		3.132	2.2	1.379	0.739	0.434		0.0329061	0.022934	0.0141532	0.00752553	0.00438516		-3.4141	-3.77513	-4.25782	-4.88945	-5.42953	-0.00445849	0.989653		9.43883e-06	1.34484e-12
KYG 5	3.603	3.552	3.192	2.763	1.935	1.503	0.0405965	0.03971	0.0354073	0.0301747	0.0209675	0.0161595	-3.20407	-3.22615	-3.34084	-3.50075	-3.86478	-4.12525	-0.00210502	0.98682	0.991299	4.45643e-06	3.16004e-12
NE2 1	3.863	3.306	2.716	2.102	1.32	0.972	0.0433541	0.0368139	0.0300083	0.0228653	0.0142469	0.0104092	-3.13835	-3.30188	-3.50628	-3.77813	-4.25121	-4.56507	-0.00304965	0.973741		6.45626e-06	5.37059e-13	6.7662e-13	1.01128e-13
NE2 2	3.627	3.327	2.784	2.208	1.375	0.505	0.041109	0.0374149	0.0310645	0.0242564	0.0149876	0.00546166	-3.19153	-3.28569	-3.47169	-3.71908	-4.20053	-5.21	-0.00415243	0.970231		8.79088e-06	6.79348e-13
NE2 3	3.538	3.137	2.472	1.903	1.052	0.325	0.0400557	0.0352391	0.0275525	0.0208826	0.0114542	0.00348388	-3.21748	-3.3456	-3.59166	-3.86884	-4.4694	-5.65961	-0.0050131	0.97174		1.0613e-05	7.95525e-13
NE2 4	3.544	3.145	2.473	1.84	1.037	0.33	0.04005	0.035264	0.027513	0.0201541	0.0112701	0.0035585	-3.21763	-3.34489	-3.5931	-3.90435	-4.4856	-5.63842	-0.00498622	0.977054		1.05561e-05	6.25904e-13
NE2 5	3.452	3.18	2.477	1.912	1.126	0.369	0.0393943	0.0360074	0.0278288	0.0211489	0.0123578	0.00401821	-3.23414	-3.32403	-3.58168	-3.85617	-4.39347	-5.51692	-0.00470337	0.972237	0.973001	9.95726e-06	7.45265e-13
SV97 1	3.531	3.244	2.649	2.467	1.794	0.683	0.040178	0.0366247	0.0296741	0.0272081	0.0196315	0.00741575	-3.21444	-3.30703	-3.51748	-3.60424	-3.93062	-4.90415	-0.0033206	0.926103		7.02987e-06	6.19361e-13	8.90901e-13	4.63242e-13
SV97 2	3.51	3.269	2.648	2.075	1.24	0.309	0.0395486	0.0365462	0.029373	0.0226611	0.0134365	0.00332221	-3.23022	-3.30918	-3.52768	-3.78711	-4.30978	-5.70713	-0.00503557	0.946433		1.06605e-05	4.87029e-13
SV97 3	3.495	3.285	2.628	2.025	1.18	0.342	0.0397683	0.0370876	0.0294389	0.0223333	0.0129126	0.00371331	-3.22468	-3.29447	-3.52544	-3.80167	-4.34955	-5.59583	-0.0048868	0.962331		1.03456e-05	1.6735e-12
SV97 4	3.398	3.107	2.404	1.795	0.89	0.264	0.0386268	0.0350437	0.0269033	0.0197774	0.00972964	0.00286361	-3.25381	-3.35116	-3.61551	-3.92322	-4.63258	-5.85567	-0.00543601	0.976505		1.15083e-05	7.96596e-13
SV97 5	3.609	3.534	2.729	2.098	1.261	0.309	0.040062	0.0389238	0.0298232	0.022573	0.0134618	0.00327301	-3.21733	-3.24615	-3.51247	-3.791	-4.3079	-5.72204	-0.00513908	0.9487	0.952014	1.08797e-05	8.78015e-13

## Sheet: S3 - Energy calculations
Energy calculations
Strain	Carbon content per cell [%]	Carbon per gram dry weight [mol g-1]	Dry weight [g cell-1]	Molar mass of carbon [g mol-1]	ΔGr atmospheric CH4 oxidation at 20°C [kJ mol-1]	ΔGr atmospheric CO oxidation at 20°C [kJ mol-1]	ΔGr atmospheric H2 oxidation at 20°C [kJ mol-1]	ΔGr atmospheric CH4 oxidation at 20°C [J µmol-1]	ΔGr atmospheric CO oxidation at 20°C [J µmol-1]	ΔGr atmospheric H2 oxidation at 20°C [J µmol-1]
Methylocapsa aurea KYG	49.4757	0.041193	2.3559e-13	12.0107	-797.366	-236.803	-199.867	-0.797366	-0.236803	-0.199867
Methylocapsa palsarum	53.1349	0.0442396	1.82e-13
Methylocapsa gorgona MG08	52.8037	0.0439639	1.2505e-13
Methylocystis rosea SV97	46.9519	0.0390917	1.522e-13
Average engery yield of M. aurea KYG, M. gorgona MG08, M. palsarum NE2, and M. rosea SV97 per cell from the oxidation of air (Fig. 1B)
ID	CH4 oxidation rate at 1.87 p.p.m.v [µmol hour-1 cell-1]	H2 oxidation rate at 0.5 p.p.m.v. [µmol hour-1 cell-1]	CO oxidation rate at 0.2 p.p.m.v. [µmol hour-1 cell-1]	Energy from atm. CH4 oxidation [J cell-1 h-1]	Energy from atm. H2 oxidation [J cell-1 h-1]	Energy from atm. CO oxidation [J cell-1 h-1]	Energy from oxidation of air [J cell-1 h-1]	Average energy from oxidation of air [J cell-1 h-1]	STD [J cell-1 h-1]
MG08 1	1.36231e-12	2.36271e-12	2.29702e-13	-1.08626e-12	-4.72228e-13	-5.43942e-14	-1.61289e-12	-2.207e-12	4.36468e-13
MG08 2	2.30239e-12	2.67929e-12	3.61023e-13	-1.83584e-12	-5.35502e-13	-8.54913e-14	-2.45684e-12
MG08 3	1.65596e-12	3.0549e-12	2.26652e-13	-1.32041e-12	-6.10573e-13	-5.36719e-14	-1.98465e-12
MG08 4	1.97379e-12	2.80815e-12	3.96153e-13	-1.57383e-12	-5.61257e-13	-9.38101e-14	-2.2289e-12
MG08 5	2.3898e-12	3.88057e-12	2.98003e-13	-1.90554e-12	-7.75599e-13	-7.0568e-14	-2.75171e-12
KYG 1	4.58164e-12	3.27239e-12	9.34348e-13	-3.65324e-12	-6.54042e-13	-2.21256e-13	-4.52854e-12	-6.89284e-12	3.22465e-12
KYG 2	3.78256e-12	2.79955e-12	7.75571e-13	-3.01608e-12	-5.59537e-13	-1.83657e-13	-3.75927e-12
KYG 3	9.94778e-12	3.31664e-12	2.56719e-12	-7.93202e-12	-6.62886e-13	-6.07918e-13	-9.20282e-12
KYG 4	5.89045e-12	3.3209e-12	1.34484e-12	-4.69684e-12	-6.63738e-13	-3.18463e-13	-5.67905e-12
KYG 5	1.21759e-11	4.19075e-12	3.16004e-12	-9.70865e-12	-8.37591e-13	-7.48308e-13	-1.12945e-11
NE2 1	3.39211e-12		5.37059e-13	-2.70475e-12	0	-1.27177e-13	-2.83193e-12	-3.09141e-12	2.89662e-13
NE2 2	3.72125e-12		6.79348e-13	-2.9672e-12	0	-1.60872e-13	-3.12807e-12
NE2 3	4.24279e-12		7.95525e-13	-3.38305e-12	0	-1.88383e-13	-3.57144e-12
NE2 4	3.4779e-12		6.25904e-13	-2.77316e-12	0	-1.48216e-13	-2.92138e-12
NE2 5	3.54635e-12		7.45265e-13	-2.82773e-12	0	-1.76481e-13	-3.00421e-12
SV97 1	4.82687e-12	1.18967e-12	6.19361e-13	-3.84878e-12	-2.37777e-13	-1.46666e-13	-4.23323e-12	-3.87867e-12	1.56682e-12
SV97 2	2.10264e-12	6.02901e-13	4.87029e-13	-1.67657e-12	-1.205e-13	-1.1533e-13	-1.9124e-12
SV97 3	6.80577e-12	2.02799e-12	1.6735e-12	-5.42669e-12	-4.05327e-13	-3.96291e-13	-6.2283e-12
SV97 4	3.74632e-12	1.01073e-12	7.96596e-13	-2.98719e-12	-2.02011e-13	-1.88636e-13	-3.37783e-12
SV97 5	4.05924e-12	1.14783e-12	8.78015e-13	-3.23669e-12	-2.29413e-13	-1.75486e-13	-3.64159e-12
Average engery yield of M. aurea KYG, M. gorgona MG08, M. palsarum NE2, and M. rosea SV97 per C-mol from the oxidation of air (Fig. 3)
ID	CH4 oxidation rate at 1.87 p.p.m.v [mol hour-1 cell-1]	H2 oxidation rate at 0.5 p.p.m.v. [mol hour-1 cell-1]	CO oxidation rate at 0.2 p.p.m.v. [mol hour-1 cell-1]	CH4 oxidation rate per gram dry weight [mol h-1 g-1]	H2 oxidation rate per gram dry weight [mol h-1 g-1]	CO oxidation rate per gram dry weight [mol h-1 g-1]	CH4 oxidation rate per mol cellular carbon [mol Cmol-1 h-1]	H2 oxidation rate per mol cellular carbon [mol Cmol-1 h-1]	CO oxidation rate per mol cellular carbon [mol Cmol-1 h-1]	Energy from atmospheric CH4 oxidation [kJ Cmol-1 h-1]	Energy from atmospheric H2 oxidation [kJ Cmol-1 h-1]	Energy from atmospheric CO oxidation [kJ Cmol-1 h-1]	Energy from oxidation of air [kJ Cmol-1 h-1]	Average energy from oxidation of air [kJ Cmol-1 h-1]	STD [kJ Cmol-1 h-1]
MG08 1	1.36231e-18	2.36271e-18	2.29702e-19	1.08942e-05	1.88941e-05	1.83688e-06	0.000247798	0.000429765	4.17817e-05	-0.197586	-0.0858958	-0.00989402	-0.293375
MG08 2	2.30239e-18	2.67929e-18	3.61023e-19	1.84117e-05	2.14258e-05	2.88703e-06	0.000418792	0.000487349	6.56682e-05	-0.33393	-0.097405	-0.0155504	-0.446886
MG08 3	1.65596e-18	3.0549e-18	2.26652e-19	1.32424e-05	2.44294e-05	1.81249e-06	0.000301211	0.00055567	4.12269e-05	-0.240175	-0.11106	-0.00976264	-0.360998
MG08 4	1.97379e-18	2.80815e-18	3.96153e-19	1.5784e-05	2.24562e-05	3.16796e-06	0.000359022	0.000510788	7.20582e-05	-0.286272	-0.10209	-0.0170636	-0.405425
MG08 5	2.3898e-18	3.88057e-18	2.98003e-19	1.91107e-05	3.10322e-05	2.38307e-06	0.000434692	0.000705856	5.42052e-05	-0.346608	-0.141077	-0.012836	-0.500521	-0.401441	0.0793912
KYG 1	4.58164e-18	3.27239e-18	9.34348e-19	1.94475e-05	1.38902e-05	3.96599e-06	0.000472107	0.000337197	9.62782e-05	-0.376442	-0.0673945	-0.0227989	-0.466635
KYG 2	3.78256e-18	2.79955e-18	7.75571e-19	1.60557e-05	1.18831e-05	3.29204e-06	0.000389767	0.000288474	7.99173e-05	-0.310786	-0.0576565	-0.0189246	-0.387368
KYG 3	9.94778e-18	3.31664e-18	2.56719e-18	4.2225e-05	1.4078e-05	1.08968e-05	0.00102505	0.000341757	0.000264531	-0.81734	-0.0683059	-0.0626418	-0.948288
KYG 4	5.89045e-18	3.3209e-18	1.34484e-18	2.5003e-05	1.40961e-05	5.7084e-06	0.000606971	0.000342196	0.000138577	-0.483978	-0.0683937	-0.0328154	-0.585187
KYG 5	1.21759e-17	4.19075e-18	3.16004e-18	5.16826e-05	1.77883e-05	1.34133e-05	0.00125464	0.000431828	0.000325621	-1.00041	-0.0863081	-0.077108	-1.16383	-0.710261	0.332278
NE2 1	3.39211e-18		5.37059e-19	1.8638e-05	0	2.95088e-06	0.000421296		6.67021e-05	-0.335927	0	-0.0157953	-0.351722
NE2 2	3.72125e-18		6.79348e-19	2.04464e-05	0	3.73268e-06	0.000462175	0	8.43742e-05	-0.368522	0	-0.0199801	-0.388502
NE2 3	4.24279e-18		7.95525e-19	2.3312e-05	0	4.37102e-06	0.000526949	0	9.88033e-05	-0.420171	0	-0.0233969	-0.443568
NE2 4	3.4779e-18		6.25904e-19	1.91094e-05	0	3.43903e-06	0.000431951	0	7.77365e-05	-0.344423	0	-0.0184082	-0.362831
NE2 5	3.54635e-18		7.45265e-19	1.94854e-05	0	4.09486e-06	0.000440452	0	9.2561e-05	-0.351201	0	-0.0219187	-0.37312	-0.383949	0.0359756
SV97 1	4.82687e-18	1.18967e-18	6.19361e-19	3.1714e-05	7.81652e-06	4.06939e-06	0.000811273	0.000199954	0.000104098	-0.646881	-0.0399641	-0.0246508	-0.711496
SV97 2	2.10264e-18	6.02901e-19	4.87029e-19	1.3815e-05	3.96124e-06	3.19993e-06	0.0003534	0.000101332	8.1857e-05	-0.281789	-0.0202529	-0.019384	-0.321426
SV97 3	6.80577e-18	2.02799e-18	1.6735e-18	4.4716e-05	1.33245e-05	1.09954e-05	0.00114387	0.000340852	0.000281273	-0.912086	-0.068125	-0.0666062	-1.04682
SV97 4	3.74632e-18	1.01073e-18	7.96596e-19	2.46144e-05	6.64077e-06	5.23387e-06	0.000629659	0.000169877	0.000133887	-0.502069	-0.0339527	-0.0317049	-0.567726
SV97 5	4.05924e-18	1.14783e-18	8.78015e-19	2.66704e-05	7.54158e-06	5.76882e-06	0.000682253	0.00019292	0.000147572	-0.544005	-0.0385584	-0.0349454	-0.617508	-0.652995	0.263147

## Sheet: S4 - Gibbs free energy
Gibbs free energy change at amtospheric CH4, H2, and CO
Gibbs free energy of formation at standard conditions (ΔGf°)
Reference: Lange, N. A., & In Dean, J. A. (1973). Lange's Handbook of chemistry. New York: McGraw-Hill.
	ΔGf° [kJ mol-1]
CO	-137.16
O2	0
CO2	-394.39
H2	0
H2O	-237.13
CH4	-50.6
Gibbs free energy change of reaction at standard conditions (ΔG°r) [kJ mol-1]
Reaction				ΔG°r
CH4 + 2O2 --> CO2 + 2H2O				-818.05
CO + 0.5O2 --> CO2				-257.23
H2 + 0.5O2 --> H2O				-237.13
Gibbs free energy change of reaction at 20 °C and atmospheric gas concentrations
CH4
ΔG°r [kJ mol-1]	R [kJ K-1 mol-1]	Kelvin at 0°C	Temperature for calculation [°C]	atm. CH4	atm. O2	atm. CO2	H2O	ΔGr [kJ mol-1]
-818.05	0.008314	273.15	20	1.87e-06	0.21	0.0004	1	-797.366
CO
ΔG°r [kJ mol-1]	R [kJ K-1 mol-1]	Kelvin at 0°C	Temperature for calculation [°C]		atm. CO	atm. O2	atm. CO2	ΔGr [kJ mol-1]
-257.23	0.008314	273.15	20		2e-07	0.21	0.0004	-236.803
H2
ΔG°r [kJ mol-1]	R [kJ K-1 mol-1]	Kelvin at 0°C	Temperature for calculation [°C]		atm. H2	atm. O2	H2O	ΔGr [kJ mol-1]
-237.13	0.008314	273.15	20		5e-07	0.21	1	-199.867

## Sheet: S5 - Comparative proteomics
Proteins involved in trace gas oxidation, carbon assimilation, and the electron transport chain (Fig. 3, Supplementary Fig.4, Supplementary Fig.5-6)
Microscope platform annotations and protein abundances used for the comparative proteomics analysis: "trace gas oxidation, carbon assimilation, and the electron transport chain", Label - Gene ID used by Microscope platform, Organism - strain designation used by Microscope platform (Beijerinckiaceae sp. MG08 WGS MS08 = Methylocapsa gorgona MG08), Protein product - protein designation by Microscope…
Label	Organism	Protein product	Curated name	Protein FDR Confidence: Combined	Abundances (Normalized): F14: Sample, 1000ppm	Abundances (Normalized): F15: Sample, 1000ppm	Abundances (Normalized): F16: Sample, 1000ppm	Abundances (Normalized): F18: Sample, 1000ppm	Abundances (Normalized): F17: Sample, atm	Abundances (Normalized): F19: Sample, atm	Abundances (Normalized): F20: Sample, atm	Abundances (Normalized): F21: Sample, atm
MS08_v1_2140	Beijerinckiaceae sp. MG08 WGS MS08	PmoC	Particulate methane monooxygenase gamma	High	5.28341e+08	5.12787e+08	5.35284e+08	7.14068e+08	1.66237e+08	1.34815e+08	1.5491e+08	1.19067e+08
MS08_v1_2141	Beijerinckiaceae sp. MG08 WGS MS08	Particulate methane monooxygenase beta subunit	Particulate methane monooxygenase beta	High	6.24235e+08	7.13167e+08	8.21929e+08	9.93368e+08	2.6776e+08	1.92294e+08	2.13197e+08	1.61314e+08
MS08_v1_2142	Beijerinckiaceae sp. MG08 WGS MS08	Particulate methane monooxygenase alpha subunit	Particulate methane monooxygenase alpha	High	1.00406e+10	1.02437e+10	1.14176e+10	1.13283e+10	4.66738e+09	3.80001e+09	4.12621e+09	3.78703e+09
MS08_v1_1597	Beijerinckiaceae sp. MG08 WGS MS08	Methanol dehydrogenase [cytochrome c] subunit 2	Methanol dehydrogenase	High	4.88489e+08	4.773e+08	3.90474e+08	5.28335e+08	1.84696e+08	2.09533e+08	6.37014e+07	1.66629e+08
MS08_v1_1600	Beijerinckiaceae sp. MG08 WGS MS08	Methanol dehydrogenase [cytochrome c] subunit 1	Methanol dehydrogenase	High	4.71629e+09	4.6952e+09	4.07018e+09	4.95906e+09	1.41832e+09	1.69243e+09	7.61297e+08	1.45794e+09
MS08_v1_2918	Beijerinckiaceae sp. MG08 WGS MS08	Putative dehydrogenase XoxF	Methanol dehydrogenase xoxF	High	1.24002e+08	1.25768e+08	2.0058e+08	9.69692e+07	5.72598e+07	4.9341e+07	5.97316e+07	5.06615e+07
MS08_v1_0172	Beijerinckiaceae sp. MG08 WGS MS08	5,6,7,8-tetrahydromethanopterin hydro-lyase	Formaldehyde activating enzyme	High	6.62155e+08	7.00387e+08	7.80792e+08	7.90302e+08	5.03153e+08	5.96468e+08	5.71842e+08	5.18013e+08
MS08_v1_1181	Beijerinckiaceae sp. MG08 WGS MS08	Formaldehyde activating enzyme	Formaldehyde activating enzyme	High	4.89035e+06	5.43408e+06	1.99135e+06	4.45115e+06	1.875e+06	1.8913e+06	3.42781e+06	3.41833e+06
MS08_v1_0177	Beijerinckiaceae sp. MG08 WGS MS08	NAD(P)-dependent methylenetetrahydromethanopterin dehydrogenase	NAD(P)-dependent methylenetetrahydromethanopterin dehydrogenase	High	1.63233e+08	1.66812e+08	1.15229e+08	1.45742e+08	5.08879e+07	6.50563e+07	6.24509e+07	5.72839e+07
MS08_v1_0175	Beijerinckiaceae sp. MG08 WGS MS08	Methenyltetrahydromethanopterin cyclohydrolase	Methenyltetrahydromethanopterin cyclohydrolase	High	9.7373e+07	9.18104e+07	6.77514e+07	8.86374e+07	3.44914e+07	4.51357e+07	4.80906e+07	4.78898e+07
MS08_v1_0155	Beijerinckiaceae sp. MG08 WGS MS08	Formyltransferase/hydrolase complex Fhc subunit C	Formyltransferase/hydrolase complex	High	4.08133e+07	3.54105e+07	2.91354e+07	3.51403e+07	2.50661e+07	2.70877e+07	3.13236e+07	2.66713e+07
MS08_v1_0156	Beijerinckiaceae sp. MG08 WGS MS08	Formyltransferase/hydrolase complex subunit D	Formyltransferase/hydrolase complex	High	4.46056e+07	4.46376e+07	2.43705e+07	4.52551e+07	4.28899e+07	3.84883e+07	3.75788e+07	4.06879e+07
MS08_v1_0157	Beijerinckiaceae sp. MG08 WGS MS08	Formyltransferase/hydrolase complex Fhc subunit A	Formyltransferase/hydrolase complex	High	2.21057e+07	2.31455e+07	2.59031e+07	2.8865e+07	2.1894e+07	2.59901e+07	2.73045e+07	2.92106e+07
MS08_v1_0159	Beijerinckiaceae sp. MG08 WGS MS08	Tungsten formylmethanofuran dehydrogenase	Formyltransferase/hydrolase complex	High	3.08414e+07	3.21856e+07	2.62995e+07	4.55398e+07	3.87337e+07	3.76661e+07	4.35842e+07	4.09111e+07
MS08_v1_1856	Beijerinckiaceae sp. MG08 WGS MS08	Formate dehydrogenase	NAD dependent Formate dehydrogenase	High	6.23766e+06	5.60719e+06	3.31208e+07	5.47565e+06	6.3238e+08	8.57304e+08	5.76069e+08	8.27621e+08
MS08_v1_2322	Beijerinckiaceae sp. MG08 WGS MS08	NAD-dependent formate dehydrogenase gamma subunit	molybdopterin dependent formate dehydrogenase	High	8.97965e+06	9.08745e+06	4.64685e+06	8.29297e+06	1.46747e+06	2.45569e+06	3.80322e+06	2.26216e+06
MS08_v1_2323	Beijerinckiaceae sp. MG08 WGS MS08	NAD-dependent formate dehydrogenase beta subunit	molybdopterin dependent formate dehydrogenase	High	2.53686e+07	2.74446e+07	1.18941e+07	3.0325e+07	6.46002e+06	7.22002e+06	1.04122e+07	6.93845e+06
MS08_v1_2324	Beijerinckiaceae sp. MG08 WGS MS08	NAD-dependent formate dehydrogenase alpha subunit	molybdopterin dependent formate dehydrogenase	High	2.36199e+07	2.69244e+07	1.26805e+07	3.10598e+07	1.84038e+07	1.40958e+07	1.80336e+07	1.57621e+07
MS08_v1_2326	Beijerinckiaceae sp. MG08 WGS MS08	NAD-dependent formate dehydrogenase delta subunit	molybdopterin dependent formate dehydrogenase	High	6.89602e+06	7.8356e+06	2.67625e+06	7.11721e+06	1.21273e+06	1.3588e+06	2.99921e+06	1.28666e+06
MS08_v1_1846	Beijerinckiaceae sp. MG08 WGS MS08	Formate--tetrahydrofolate ligase	Formate--tetrahydrofolate ligase	High	2.00832e+08	2.20616e+08	1.83264e+08	1.99634e+08	6.43083e+07	6.60155e+07	5.96092e+07	7.22925e+07
MS08_v1_3359	Beijerinckiaceae sp. MG08 WGS MS08	bifunctional 5,10-methylene-tetrahydrofolate dehydrogenase/ 5,10-methylene-tetrahydrofolate cyclohydrolase	methylene-tetrahydrofolate dehydrogenase/methylene-tetrahydrofolate cyclohydrolase	High	1.44677e+08	1.53417e+08	1.02569e+08	1.37312e+08	1.65112e+07	1.9893e+07	1.91304e+07	1.9314e+07
MS08_v1_0147	Beijerinckiaceae sp. MG08 WGS MS08	glycine cleavage system H protein	Glycine cleavage system H protein	High	3.22304e+06	3.09239e+06	2.5097e+06	5173699	5.5733e+06	5.92866e+06	8.07028e+06	7.33175e+06
MS08_v1_0146	Beijerinckiaceae sp. MG08 WGS MS08	Aminomethyltransferase (glycine cleavage system T protein)	Aminomethyltransferase	High	1.34481e+06	1.34223e+06	418042	1.1396e+06	3.60101e+06	2.57322e+06	5.06533e+06	2.90592e+06
MS08_v1_0148	Beijerinckiaceae sp. MG08 WGS MS08	putative glycine dehydrogenase (decarboxylating) subunit 1	Putative glycine dehydrogenase subunit 2	High	1.19733e+06	1.58892e+06	985354	1.56492e+06	871621	773759	1.75068e+06	584018
MS08_v1_0149	Beijerinckiaceae sp. MG08 WGS MS08	putative glycine dehydrogenase (decarboxylating) subunit 2	Putative glycine dehydrogenase subunit 1	High	436101	472420	280321	333275	318688	230266	421686	623340
MS08_v1_0043	Beijerinckiaceae sp. MG08 WGS MS08	Dihydrolipoyl dehydrogenase	Dihydrolipoyl dehydrogenase	High	127029	155387	269328	715118	1.40146e+07	1.67627e+07	1.49477e+07	1.6327e+07
MS08_v1_2839	Beijerinckiaceae sp. MG08 WGS MS08	Dihydrolipoyl dehydrogenase	Dihydrolipoyl dehydrogenase	High	1.01717e+07	9.46591e+06	3.76942e+06	6.23133e+06	1.07647e+07	1.18669e+07	1.38159e+07	1.24791e+07
MS08_v1_0803	Beijerinckiaceae sp. MG08 WGS MS08	serine hydroxymethyltransferase	Serine hydroxymethyltransferase	High	2.08645e+08	2.29992e+08	1.78939e+08	2.16508e+08	5.86897e+07	5.74394e+07	7.58652e+07	6.21478e+07
MS08_v1_1844	Beijerinckiaceae sp. MG08 WGS MS08	Serine--glyoxylate aminotransferase	Serine--glyoxylate aminotransferase	High	5.92748e+08	5.77432e+08	4.19047e+08	5.00106e+08	1.66914e+08	1.89837e+08	1.37313e+08	1.78232e+08
MS08_v1_1845	Beijerinckiaceae sp. MG08 WGS MS08	Glycerate dehydrogenase	Glycerate dehydrogenase	High	1.99294e+08	1.79238e+08	1.24738e+08	1.51181e+08	4.36912e+07	5.61684e+07	4.68218e+07	5.22826e+07
MS08_v1_1843	Beijerinckiaceae sp. MG08 WGS MS08	Putative hydroxypyruvate reductase	2-glycerate kinase	High	2.10921e+07	2.05513e+07	1.23629e+07	1.81391e+07	6.46993e+06	7.53444e+06	5.54074e+06	6.72746e+06
MS08_v1_0494	Beijerinckiaceae sp. MG08 WGS MS08	enolase	enolase	High	1.62657e+08	1.52867e+08	1.2502e+08	1.522e+08	6.23315e+07	7.51324e+07	8.66513e+07	9.09468e+07
MS08_v1_0548	Beijerinckiaceae sp. MG08 WGS MS08	Phosphoenolpyruvate carboxylase	Phosphoenolpyruvate carboxylase	High	2.2836e+07	2.2028e+07	1.07532e+07	2.34366e+07	1.63381e+07	1.58692e+07	1.48925e+07	1.46458e+07
MS08_v1_1840	Beijerinckiaceae sp. MG08 WGS MS08	Phosphoenolpyruvate carboxylase	Phosphoenolpyruvate carboxylase	High	5.0458e+07	4.25528e+07	2.61468e+07	3.3374e+07	1.86199e+07	1.53474e+07	1.43629e+07	1.62433e+07
MS08_v1_2833	Beijerinckiaceae sp. MG08 WGS MS08	Malate dehydrogenase	Malate dehydrogenase	High	4.42087e+07	4.31817e+07	3.09605e+07	4.08113e+07	1.20755e+07	1.41627e+07	1.80675e+07	1.33052e+07
MS08_v1_3207	Beijerinckiaceae sp. MG08 WGS MS08	malate dehydrogenase	Malate dehydrogenase	High	5.06029e+06	5.56615e+06	4.7146e+06	6.2457e+06	2.50195e+06	2.68823e+06	2.40586e+06	2.17117e+06
MS08_v1_1841	Beijerinckiaceae sp. MG08 WGS MS08	succinyl-CoA synthetase subunit alpha	malate-CoA ligase alpha subunit	High	8.18967e+07	8.68223e+07	6.50398e+07	8.45466e+07	2.05995e+07	2.64193e+07	2.0804e+07	2.49996e+07
MS08_v1_1842	Beijerinckiaceae sp. MG08 WGS MS08	succinyl-CoA synthetase subunit beta	malate-CoA ligase beta subunit	High	1.97734e+08	1.70838e+08	1.55145e+08	1.56005e+08	5.58818e+07	6.4888e+07	5.07837e+07	6.80046e+07
MS08_v1_2834	Beijerinckiaceae sp. MG08 WGS MS08	succinyl-CoA synthetase subunit beta	malate-CoA ligase beta subunit	High	1.4392e+07	1.43118e+07	6.93151e+06	1.00036e+07	3.3599e+06	4.51719e+06	4.42867e+06	3.52483e+06
MS08_v1_2835	Beijerinckiaceae sp. MG08 WGS MS08	succinyl-CoA synthetase subunit alpha	malate-CoA ligase alpha subunit	High	7.9628e+06	7.70533e+06	5.54198e+06	7.1582e+06	2.1837e+06	3.87219e+06	5.12986e+06	2.909e+06
MS08_v1_1839	Beijerinckiaceae sp. MG08 WGS MS08	L-malyl-CoA/beta-methylmalyl-CoA lyase	L-malyl-CoA	High	1.51613e+08	1.27828e+08	1.35341e+08	1.20746e+08	4.89348e+07	6.3059e+07	6.17178e+07	6.07158e+07
MS08_v1_0411	Beijerinckiaceae sp. MG08 WGS MS08	acetyl-CoA carboxyltransferase subunit beta	Acetyl-CoA carboxylase, beta (carboxyltranferase) subunit	High	1.08854e+07	8.6413e+06	4.97725e+06	8.04982e+06	8.20214e+06	9.23128e+06	1.17608e+07	1.07734e+07
MS08_v1_0479	Beijerinckiaceae sp. MG08 WGS MS08	biotin carboxyl carrier protein	acetyl CoA carboxylase, BCCP subunit	High	2.67366e+07	2.73647e+07	1.66057e+07	2.26808e+07	1.48731e+07	1.56535e+07	1.59094e+07	1.37055e+07
MS08_v1_0480	Beijerinckiaceae sp. MG08 WGS MS08	biotin carboxylase	Acetyl-CoA carboxylase, biotin carboxylase subunit	High	2.00431e+07	1.95661e+07	1.50296e+07	1.88702e+07	1.02002e+07	1.52206e+07	1.58643e+07	1.10116e+07
MS08_v1_1627	Beijerinckiaceae sp. MG08 WGS MS08	Carbon monoxide dehydrogenase medium chain	Carbon monoxide dehydrogenase medium chain	High	22245.5			68723.9	1.08814e+08	1.24676e+08	1.83911e+08	1.67496e+08
MS08_v1_1628	Beijerinckiaceae sp. MG08 WGS MS08	Carbon monoxide dehydrogenase small chain	Carbon monoxide dehydrogenase small chain	High	305863	323655		251343	8.10296e+07	6.93615e+07	9.37216e+07	8.59601e+07
MS08_v1_1630	Beijerinckiaceae sp. MG08 WGS MS08	Carbon monoxide dehydrogenase large chain	Carbon monoxide dehydrogenase large chain	High	619395	723386	1.77362e+06	401017	1.89674e+08	2.26673e+08	2.63804e+08	2.37226e+08
MS08_v1_1135	Beijerinckiaceae sp. MG08 WGS MS08	Ubiquinol-cytochrome c reductase iron-sulfur subunit	Ubiquinol-cytochrome c reductase cytochrome c subunit	High	3.70429e+06	3.02901e+06	2.8723e+06	5.00411e+06	2.58482e+06	1.87232e+06	3.22207e+06	1.85582e+06
MS08_v1_1136	Beijerinckiaceae sp. MG08 WGS MS08	Ubiquinol--cytochrome c reductase, cytochrome B subunit	Ubiquinol-cytochrome c reductase cytochrome c subunit	High	5.36245e+06	5.19409e+06	4.09371e+06	7.36962e+06	3.31908e+06	3.33068e+06	4.77799e+06	3.08614e+06
MS08_v1_1137	Beijerinckiaceae sp. MG08 WGS MS08	Cytochrome c1	Ubiquinol-cytochrome c reductase cytochrome c subunit	High	7.15643e+06	8.13155e+06	5.37834e+06	1.12261e+07	3.68183e+06	4.12936e+06	7.10541e+06	3.40485e+06
MS08_v1_0079	Beijerinckiaceae sp. MG08 WGS MS08	cytochrome bd-I ubiquinol oxidase subunit II	Cytochrome c oxidase subunit	High	489994	588020	718721	1.17017e+06	1.13882e+06	827441	1.12573e+06	992248
MS08_v1_0080	Beijerinckiaceae sp. MG08 WGS MS08	cytochrome bd-I ubiquinol oxidase subunit I	Cytochrome c oxidase subunit	High	2.78498e+06	3.17239e+06	2.02383e+06	3.84407e+06	4.42764e+06	3.53128e+06	4.17624e+06	3.4064e+06
MS08_v1_0138	Beijerinckiaceae sp. MG08 WGS MS08	Cytochrome c oxidase subunit 3	Cytochrome c oxidase subunit	High	1.37056e+06	708967	777770	698748
MS08_v1_0139	Beijerinckiaceae sp. MG08 WGS MS08	Cytochrome c oxidase assembly protein CtaG	Cytochrome c oxidase subunit	High	152237	184732	142125	182534
MS08_v1_0141	Beijerinckiaceae sp. MG08 WGS MS08	cytochrome bo3 ubiquinol oxidase subunit 1	Cytochrome c oxidase subunit	High	3.32359e+06	4.58359e+06	4.52201e+06	8.08488e+06		107850	582160
MS08_v1_0142	Beijerinckiaceae sp. MG08 WGS MS08	putative cytochrome c oxidase subunit 2	Cytochrome c oxidase subunit	High	3.09871e+07	3.25952e+07	2.23993e+07	2.27374e+07	1.42109e+06	1.85914e+06	3.87405e+06	1.16107e+06
MS08_v1_0698	Beijerinckiaceae sp. MG08 WGS MS08	cytochrome bo3 ubiquinol oxidase subunit 2	Cytochrome c oxidase subunit	High	378188	726386	391716	1.02477e+06	1.19571e+06	1.27614e+06	2.12216e+06	2.43865e+06
MS08_v1_0699	Beijerinckiaceae sp. MG08 WGS MS08	cytochrome bo3 ubiquinol oxidase subunit 1	Cytochrome c oxidase subunit	High	182205	205433	309504	473391	213009	203234		265771
MS08_v1_0701	Beijerinckiaceae sp. MG08 WGS MS08	Cytochrome bo(3) ubiquinol oxidase subunit 4	Cytochrome c oxidase subunit	High	493634	351060		791949	664955	776403	410217	360583
MS08_v1_3033	Beijerinckiaceae sp. MG08 WGS MS08	putative Cytochrome-c oxidase	Cytochrome c oxidase subunit	High	726778	881687	1.43163e+06	779676	819609	625635	584810	592489
MS08_v1_3038	Beijerinckiaceae sp. MG08 WGS MS08	Alternative cytochrome c oxidase subunit 1	Cytochrome c oxidase subunit	High	8.46701e+06	7.91868e+06	8.35431e+06	1.20865e+07	1.31623e+07	1.20157e+07	8.06776e+06	1.30183e+07
MS08_v1_3039	Beijerinckiaceae sp. MG08 WGS MS08	Alternative cytochrome c oxidase subunit 2	Cytochrome c oxidase subunit	High	3.15249e+06	2.90766e+06	3.0378e+06	4.02165e+06	5.89775e+06	4.8139e+06	3.8685e+06	5.08685e+06
MS08_v1_0222	Beijerinckiaceae sp. MG08 WGS MS08	Uptake hydrogenase large subunit	[NiFe] hydrogenase large subunit	High	3.81988e+06	3.37111e+06	6.71627e+06	6.79886e+06	1.04589e+09	1.01381e+09	7.35251e+08	9.68959e+08
MS08_v1_0223	Beijerinckiaceae sp. MG08 WGS MS08	Uptake hydrogenase small subunit precursor	[NiFe] hydrogenase small subunit	High	680169	118501	448712	389310	2.76749e+08	3.31518e+08	2.24896e+08	3.3315e+08
MS08_v1_2280	Beijerinckiaceae sp. MG08 WGS MS08	NADH ubiquinone oxidoreductase 20 kDa subunit	[NiFe] hydrogenase small subunit	High	113486	123540			493577	501602	642307	488269
MS08_v1_2281	Beijerinckiaceae sp. MG08 WGS MS08	Ni,Fe-hydrogenase III large subunit	[NiFe] hydrogenase large subunit	High	240470	408505	99433.9	404769	4.67157e+06	3.93059e+06	5.15459e+06	3.99448e+06
MS08_v1_0921	Beijerinckiaceae sp. MG08 WGS MS08	NADH:ubiquinone oxidoreductase 17.2 kD subunit	NADH-quinone oxidoreductase 17.2 kD subunit	High	7.92353e+06	1.01789e+07	3.30307e+06	7.37901e+06	4.627e+06	2.19889e+06	1.95456e+06	1.14872e+06
MS08_v1_2777	Beijerinckiaceae sp. MG08 WGS MS08	NADH-quinone oxidoreductase subunit A 1	NADH-quinone oxidoreductase subunit A	High	810932	700575		603656
MS08_v1_2778	Beijerinckiaceae sp. MG08 WGS MS08	NADH-quinone oxidoreductase subunit B	NADH-quinone oxidoreductase subunit B	High	3.15424e+06	3.6114e+06	2.60691e+06	4.16865e+06	590612	916577	813338	796745
MS08_v1_2779	Beijerinckiaceae sp. MG08 WGS MS08	NADH-quinone oxidoreductase subunit C	NADH-quinone oxidoreductase subunit C	High	1.28379e+07	1.1387e+07	7.51472e+06	1.34499e+07	4.33281e+06	4.89241e+06	4.95336e+06	4.31694e+06
MS08_v1_2780	Beijerinckiaceae sp. MG08 WGS MS08	NADH-quinone oxidoreductase subunit D 1	NADH-quinone oxidoreductase subunit D	High	2.18555e+07	2.122e+07	1.42825e+07	1.88794e+07	6.80362e+06	1.00188e+07	6.92056e+06	4.97144e+06
MS08_v1_2781	Beijerinckiaceae sp. MG08 WGS MS08	NADH-ubiquinone oxidoreductase chain E	NADH-quinone oxidoreductase subunit E	High	1.20289e+07	1.36947e+07	8.62517e+06	2.32072e+07	4.89897e+06	5.42307e+06	5.73116e+06	3.79928e+06
MS08_v1_2782	Beijerinckiaceae sp. MG08 WGS MS08	NADH:quinone oxidoreductase subunit F	NADH-quinone oxidoreductase subunit F	High	1.57691e+07	1.85288e+07	1.22315e+07	2.2065e+07	9.99646e+06	1.13141e+07	9.86646e+06	1.13549e+07
MS08_v1_2783	Beijerinckiaceae sp. MG08 WGS MS08	NADH-quinone oxidoreductase chain 3	NADH-quinone oxidoreductase subunit G	High	3.90119e+07	4.392e+07	2.60215e+07	4.27715e+07	1.35653e+07	1.56794e+07	1.54368e+07	1.30557e+07
MS08_v1_2784	Beijerinckiaceae sp. MG08 WGS MS08	NADH-quinone oxidoreductase subunit H 2	NADH-quinone oxidoreductase subunit H	High	1.01808e+06	1.40167e+06	286395	1.20197e+06	321089	152830	229863
MS08_v1_2785	Beijerinckiaceae sp. MG08 WGS MS08	NADH-quinone oxidoreductase subunit I	NADH-quinone oxidoreductase subunit I	High	6.72806e+06	6.63783e+06	4.23654e+06	8.73025e+06	2.51212e+06	3.98476e+06	3.03829e+06	2.9758e+06
MS08_v1_2786	Beijerinckiaceae sp. MG08 WGS MS08	NADH-quinone oxidoreductase subunit J	NADH-quinone oxidoreductase subunit J	High	6.39976e+06	6.34173e+06	3.64512e+06	6.41308e+06	3.4131e+06	3.64374e+06	4.38065e+06	3.48893e+06
MS08_v1_2788	Beijerinckiaceae sp. MG08 WGS MS08	NADH-quinone oxidoreductase chain 12	NADH-quinone oxidoreductase subunit L	High	1.07571e+07	1.1717e+07	6.46992e+06	9.37387e+06	4.98867e+06	3.27122e+06	3.44185e+06	3.12853e+06
MS08_v1_2789	Beijerinckiaceae sp. MG08 WGS MS08	NADH-quinone oxidoreductase subunit M	NADH-quinone oxidoreductase subunit M	High	755235	902518	198177	1.04253e+06	97307.9	78981.8	86800.8	44769.8
MS08_v1_2790	Beijerinckiaceae sp. MG08 WGS MS08	NADH-quinone oxidoreductase subunit N	NADH-quinone oxidoreductase subunit N	High	65603.7	132827		198064
MS08_v1_0020	Beijerinckiaceae sp. MG08 WGS MS08	ATP synthase subunit b 1	ATP synthase subunit	High	3.93573e+07	2.53724e+07	2.13292e+07	3.82231e+07	9.26228e+06	1.05927e+07	1.00534e+07	8.74086e+06
MS08_v1_0021	Beijerinckiaceae sp. MG08 WGS MS08	ATP synthase subunit b	ATP synthase subunit	High	3.48731e+07	3.8709e+07	1.98569e+07	3.35136e+07	7.35128e+06	9.10707e+06	1.10266e+07	9.29821e+06
MS08_v1_0022	Beijerinckiaceae sp. MG08 WGS MS08	ATP synthase subunit c	ATP synthase subunit	High	350424	503802	885255	776147	166809	124085	119486	131404
MS08_v1_0023	Beijerinckiaceae sp. MG08 WGS MS08	ATP synthase subunit a	ATP synthase subunit	High	431819	580557		696019
MS08_v1_0024	Beijerinckiaceae sp. MG08 WGS MS08	ATP synthase protein I	ATP synthase subunit	High	4.42454e+06	4.79994e+06	2.55497e+06	3.95177e+06	961905	786836	3.92287e+06	3.87535e+06
MS08_v1_1863	Beijerinckiaceae sp. MG08 WGS MS08	ATP synthase epsilon chain	ATP synthase subunit	High	3.72543e+07	2.66889e+07	1.73516e+07	2.29574e+07	1.29223e+07	1.48538e+07	2.05921e+07	1.64753e+07
MS08_v1_1864	Beijerinckiaceae sp. MG08 WGS MS08	ATP synthase F1 complex subunit beta	ATP synthase subunit	High	4.71798e+08	5.04131e+08	3.11233e+08	4.19618e+08	8.73228e+07	1.02201e+08	9.56169e+07	1.03758e+08
MS08_v1_1865	Beijerinckiaceae sp. MG08 WGS MS08	ATP synthase gamma chain	ATP synthase subunit	High	7.37328e+07	7.88271e+07	4.27568e+07	6.3396e+07	1.31498e+07	1.45986e+07	1.37786e+07	1.29787e+07
MS08_v1_1866	Beijerinckiaceae sp. MG08 WGS MS08	ATP synthase F1 complex subunit alpha	ATP synthase subunit	High	4.49421e+08	4.63791e+08	2.62799e+08	3.87248e+08	9.01156e+07	1.06002e+08	1.04991e+08	1.0422e+08
MS08_v1_1867	Beijerinckiaceae sp. MG08 WGS MS08	ATP synthase subunit delta	ATP synthase subunit	High	4.11975e+07	3.02224e+07	2.76645e+07	4.04747e+07	6.22248e+06	6.36313e+06	7.56442e+06	6.60736e+06
MROSv2_10341	Methylocystis rosea SV97T chromosome MROS	Particulate Methane Monooxygenase subunit C	Particulate methane monooxygenase gamma	High	369701	364456	432534	267136
MROSv2_11570	Methylocystis rosea SV97T chromosome MROS	Particulate methane monooxygenase beta subunit	Particulate methane monooxygenase beta	High	1.50464e+08	1.50381e+08	1.54889e+08	1.31535e+08	3.21338e+07	7.30065e+06	2.44512e+07	1.13089e+07
MROSv2_11571	Methylocystis rosea SV97T chromosome MROS	Particulate methane monooxygenase alpha subunit	Particulate methane monooxygenase alpha	High	2.86865e+09	2.94022e+09	3.13621e+09	3.23618e+09	4.85881e+08	1.82045e+08	3.78183e+08	2.81675e+08
MROSv2_10355	Methylocystis rosea SV97T chromosome MROS	Putative dehydrogenase XoxF	Methanol dehydrogenase xoxF	High	2.53366e+06	3.93243e+06	4.21845e+06	4.03266e+06	2.85796e+06	1.31496e+06	1.90256e+06	1.95736e+06
MROSv2_10958	Methylocystis rosea SV97T chromosome MROS	Methanol dehydrogenase [cytochrome c] subunit 1	Methanol dehydrogenase	High	5.44946e+08	6.21427e+08	7.13091e+08	5.23465e+08	5.87503e+07	4.95094e+07	9.39753e+07	5.33679e+07
MROSv2_10961	Methylocystis rosea SV97T chromosome MROS	Methanol dehydrogenase [cytochrome c] subunit 2	Methanol dehydrogenase	High	7.14631e+07	6.45503e+07	5.00562e+07	3.43027e+07	9.62341e+06	6.84844e+06	1.23456e+07	3.71257e+06
MROSv2_10347	Methylocystis rosea SV97T chromosome MROS	5,6,7,8-tetrahydromethanopterin hydro-lyase	Formaldehyde activating enzyme	High	1.40111e+08	1.34699e+08	1.63117e+08	1.10525e+08	9.79318e+06	2.28934e+07	4.36873e+06	604387
MROSv2_10349	Methylocystis rosea SV97T chromosome MROS	5,6,7,8-tetrahydromethanopterin hydro-lyase	Formaldehyde activating enzyme	High	1.59565e+07	1.73701e+07	1.73606e+07	1.27247e+07	216874	331701	71452.1
MROSv2_21213	Methylocystis rosea SV97T chromosome MROS	Formaldehyde activating enzyme	Formaldehyde activating enzyme	High	3.44138e+06	3.17877e+06	2.85658e+06	2.29086e+06	70239.6
MROSv2_40362	Methylocystis rosea SV97T chromosome MROS	NAD(P)-dependent methylenetetrahydromethanopterin dehydrogenase	NAD(P)-dependent methylenetetrahydromethanopterin dehydrogenase	High	1.17087e+07	1.32443e+07	1.40673e+07	9.73933e+06	2.54623e+06	4.49788e+06	3.42984e+06	1.70996e+06
MROSv2_10344	Methylocystis rosea SV97T chromosome MROS	Methenyltetrahydromethanopterin cyclohydrolase	Methenyltetrahydromethanopterin cyclohydrolase	High	1.60496e+07	1.95507e+07	2.28926e+07	1.65464e+07	1.39579e+06	3.04733e+06	586943	172394
MROSv2_21081	Methylocystis rosea SV97T chromosome MROS	Formyltransferase/hydrolase complex Fhc subunit C	Formyltransferase/hydrolase complex	High	3.60797e+06	3.89705e+06	4.60333e+06	3.51739e+06	1.1854e+06	940296	1.32635e+06	1.01401e+06
MROSv2_21082	Methylocystis rosea SV97T chromosome MROS	Formylmethanofuran--tetrahydromethanopterin formyltransferase	Formyltransferase/hydrolase complex	High	1.40007e+06	1.15258e+06	1.63603e+06	1.20493e+06	551579	932014	568493	240269
MROSv2_21083	Methylocystis rosea SV97T chromosome MROS	Formyltransferase/hydrolase complex Fhc subunit A	Formyltransferase/hydrolase complex	High	3.94812e+06	3.99156e+06	5.0627e+06	3.36814e+06	2.62343e+06	2.71e+06	1.76637e+06	1.47728e+06
MROSv2_21084	Methylocystis rosea SV97T chromosome MROS	Formylmethanofuran dehydrogenase	Formyltransferase/hydrolase complex	High	3.33394e+06	3.80912e+06	4.20036e+06	3.05464e+06	1.92424e+06	1.74845e+06	1.73148e+06	351544
MROSv2_11181	Methylocystis rosea SV97T chromosome MROS	NAD-dependent formate dehydrogenase delta subunit	molybdopterin dependent formate dehydrogenase	High	343827	140156	164075	167729	144761	256795	517320	49799.3
MROSv2_11182	Methylocystis rosea SV97T chromosome MROS	NAD-dependent formate dehydrogenase alpha subunit	molybdopterin dependent formate dehydrogenase	High	845418	601512	851127	1.3211e+06	259075	515657	223008	312875
MROSv2_11183	Methylocystis rosea SV97T chromosome MROS	Formate dehydrogenase	molybdopterin dependent formate dehydrogenase	High	1.56836e+06	1.66273e+06	1.84435e+06	1.74936e+06	2.17205e+06	1.74191e+06	3.34607e+06	1.09347e+06
MROSv2_11463	Methylocystis rosea SV97T chromosome MROS	NAD-dependent formate dehydrogenase gamma subunit	molybdopterin dependent formate dehydrogenase	High	2.01368e+06	2.02919e+06	1.88928e+06	1.26694e+06	1.53927e+06	1.09943e+06	3.35216e+06	1.15056e+06
MROSv2_11464	Methylocystis rosea SV97T chromosome MROS	NAD-dependent formate dehydrogenase beta subunit	molybdopterin dependent formate dehydrogenase	High	6.96213e+06	7.65903e+06	1.06591e+07	9.76296e+06	3.81509e+06	2.96158e+06	7.04843e+06	3.96917e+06
MROSv2_11465	Methylocystis rosea SV97T chromosome MROS	NAD-dependent formate dehydrogenase alpha subunit	molybdopterin dependent formate dehydrogenase	High	3.0694e+06	3.46437e+06	4.24908e+06	3.05565e+06	222475	86932.1	214775	318634
MROSv2_11467	Methylocystis rosea SV97T chromosome MROS	NAD-dependent formate dehydrogenase delta subunit	molybdopterin dependent formate dehydrogenase	High	569443	455140	450823	345842			74391.4
MROSv2_21742	Methylocystis rosea SV97T chromosome MROS	NAD-dependent formate dehydrogenase alpha subunit	molybdopterin dependent formate dehydrogenase	High	5.91403e+06	6.99479e+06	7.46524e+06	7.42712e+06	4.97304e+06	5.31665e+06	4.98739e+06	4.84151e+06
MROSv2_21743	Methylocystis rosea SV97T chromosome MROS	NAD-dependent formate dehydrogenase alpha subunit	molybdopterin dependent formate dehydrogenase	High	126803	171399	224253	203142	307975	196715	434255	110503
MROSv2_40303	Methylocystis rosea SV97T chromosome MROS	NAD-dependent formate dehydrogenase alpha subunit	molybdopterin dependent formate dehydrogenase	High	73670.1	57484.6	67279.6	67496.6	50851.3	18486.6	27999.6
MROSv2_40304	Methylocystis rosea SV97T chromosome MROS	NAD-dependent formate dehydrogenase alpha subunit	molybdopterin dependent formate dehydrogenase	High	339709	293184	365436	374732	443698	282940	473851	124505
MROSv2_10125	Methylocystis rosea SV97T chromosome MROS	Formate--tetrahydrofolate ligase	Formate--tetrahydrofolate ligase	High	1.43947e+07	1.61197e+07	1.81039e+07	1.41863e+07	3.55129e+06	3.23154e+06	4.09373e+06	1.00137e+06
MROSv2_10121	Methylocystis rosea SV97T chromosome MROS	Methenyltetrahydrofolate cyclohydrolase	Methenyltetrahydrofolate cyclohydrolase	High	5.01561e+06	4.30581e+06	4.72078e+06	3.82887e+06	1.07271e+06	1.67747e+06	354418	114511
MROSv2_10122	Methylocystis rosea SV97T chromosome MROS	NADP-dependent methylenetetrahydromethanopterin dehydrogenase / Methylenetetrahydrofolate dehydrogenase	Methylenetetrahydrofolate dehydrogenase	High	2.2785e+06	2.47966e+06	2.87053e+06	2.1303e+06	1.61162e+06	1.4731e+06	2.84289e+06	1.26062e+06
MROSv2_10787	Methylocystis rosea SV97T chromosome MROS	glycine cleavage system H protein	Glycine cleavage system H protein	High	552799	496779	621872	237831	67119.7	468519	175900
MROSv2_10788	Methylocystis rosea SV97T chromosome MROS	Aminomethyltransferase (glycine cleavage system T protein)	Aminomethyltransferase	High	5.04378e+06	4.35474e+06	6.21042e+06	2.87263e+06	938413	2.99302e+06		2.04863e+06
MROSv2_10785	Methylocystis rosea SV97T chromosome MROS	putative glycine dehydrogenase (decarboxylating) subunit 2	Putative glycine dehydrogenase subunit 2	High	2.82897e+06	2.63091e+06	3.39011e+06	1.54316e+06	158792	170054	193979	154063
MROSv2_10786	Methylocystis rosea SV97T chromosome MROS	putative glycine dehydrogenase (decarboxylating) subunit 1	Putative glycine dehydrogenase subunit 1	High	2.77758e+06	3.7892e+06	4.17943e+06	2.46406e+06	1.15026e+06	271576	285184	42008.9
MROSv2_11727	Methylocystis rosea SV97T chromosome MROS	Dihydrolipoyl dehydrogenase	Dihydrolipoyl dehydrogenase	High	1.65271e+06	1.53625e+06	1.91965e+06	1.12069e+06	579006	790244	1.00542e+06	323230
MROSv2_21499	Methylocystis rosea SV97T chromosome MROS	Dihydrolipoyl dehydrogenase	Dihydrolipoyl dehydrogenase	High	1.241e+06	1.10334e+06	1.34399e+06	590093	579203	481479	987864	298447
MROSv2_20893	Methylocystis rosea SV97T chromosome MROS	serine hydroxymethyltransferase	Serine hydroxymethyltransferase	High	2.24488e+07	2.0593e+07	2.62639e+07	1.96396e+07	3.78935e+06	7.6303e+06	4.64659e+06	1.79684e+06
MROSv2_10124	Methylocystis rosea SV97T chromosome MROS	Serine--glyoxylate aminotransferase	Serine--glyoxylate aminotransferase	High	5.89124e+07	6.58529e+07	7.45951e+07	6.1904e+07	4.07617e+06	1.03958e+07	6.47615e+06	1.50667e+06
MROSv2_10123	Methylocystis rosea SV97T chromosome MROS	Glycerate dehydrogenase	Glycerate dehydrogenase	High	1.05735e+07	1.15864e+07	1.24902e+07	1.11096e+07	3.01911e+06	4.97502e+06	3.62715e+06	1.6899e+06
MROSv2_10114	Methylocystis rosea SV97T chromosome MROS	Putative hydroxypyruvate reductase	2-glycerate kinase	High	1.69175e+06	1.50762e+06	1.91485e+06	823225	511804	651046	487144	295833
MROSv2_11710	Methylocystis rosea SV97T chromosome MROS	enolase	enolase	High	2.66923e+07	2.68184e+07	4.00436e+07	2.73569e+07	1.08206e+08	6.26997e+07	1.72244e+08	5.34025e+07
MROSv2_10118	Methylocystis rosea SV97T chromosome MROS	Phosphoenolpyruvate carboxylase	Phosphoenolpyruvate carboxylase	High	6.09799e+06	3.98784e+07	7.6613e+06	5.54049e+06	1.23992e+06	1.88683e+06	650590	344854
MROSv2_11229	Methylocystis rosea SV97T chromosome MROS	Phosphoenolpyruvate carboxylase	Phosphoenolpyruvate carboxylase	High	916270	1.15132e+06	1.20395e+06	989577	124503	342611	104335	136194
MROSv2_11402	Methylocystis rosea SV97T chromosome MROS	Malate dehydrogenase	Malate dehydrogenase	High	7.38076e+06	7.29682e+06	9.11407e+06	6.59698e+06	1.29837e+06	2.30143e+06	937976	447256
MROSv2_10119	Methylocystis rosea SV97T chromosome MROS	succinyl-CoA synthetase subunit alpha	malate-CoA ligase alpha subunit	High	7.47997e+06	7.49313e+06	8.81096e+06	6.90775e+06	7.87981e+06	6.812e+06	9.56354e+06	5.2376e+06
MROSv2_10120	Methylocystis rosea SV97T chromosome MROS	succinyl-CoA synthetase subunit beta	malate-CoA ligase beta subunit	High	1.40368e+07	1.38755e+07	1.90091e+07	1.43241e+07	1.14263e+07	9.92052e+06	2.32717e+07	8.25132e+06
MROSv2_10837	Methylocystis rosea SV97T chromosome MROS	succinyl-CoA synthetase subunit alpha	malate-CoA ligase alpha subunit	High	7.1273e+06	7.33265e+06	9.12575e+06	6.09791e+06	7.18114e+06	1.08247e+07	1.01695e+07	5.25609e+06
MROSv2_11525	Methylocystis rosea SV97T chromosome MROS	succinyl-CoA synthetase subunit beta	malate-CoA ligase beta subunit	High	9.80272e+06	9.81589e+06	1.30185e+07	7.079e+06	1.33661e+07	1.20597e+07	2.14467e+07	7.79414e+06
MROSv2_10117	Methylocystis rosea SV97T chromosome MROS	L-malyl-CoA/beta-methylmalyl-CoA lyase	L-malyl-CoA	High	4.29775e+07	4.42111e+07	5.86153e+07	4.40214e+07	2.17996e+07	2.09054e+07	3.02488e+07	1.11867e+07
MROSv2_10790	Methylocystis rosea SV97T chromosome MROS	Malyl-CoA/beta-methylmalyl-CoA/citramalyl-CoA lyase	L-malyl-CoA	High	4.51997e+06	4.98568e+06	5.555e+06	4.0977e+06	1.08096e+06	1.58454e+06	686452	227887
MROSv2_20029	Methylocystis rosea SV97T chromosome MROS	biotin carboxylase	Acetyl-CoA carboxylase, biotin carboxylase subunit	High	3.0698e+06	3.23446e+06	3.34789e+06	3.10916e+06	621787	1.30664e+06	414094	411921
MROSv2_20030	Methylocystis rosea SV97T chromosome MROS	biotin carboxyl carrier protein	Acetyl CoA carboxylase, BCCP subunit	High	1.58612e+06	1.37264e+06	1.58378e+06	1.14788e+06	702172	1.14005e+06	700471	258305
MROSv2_40350	Methylocystis rosea SV97T chromosome MROS	acetyl-CoA carboxyltransferase subunit beta	Acetyl-CoA carboxylase, beta (carboxyltranferase) subunit	High	1.12368e+06	1.11772e+06	1.37527e+06	1.14759e+06	337209	252219	155879	122792
MROSv2_20521	Methylocystis rosea SV97T chromosome MROS	Ubiquinol-cytochrome c reductase iron-sulfur subunit	Ubiquinol-cytochrome c reductase cytochrome c subunit	High	645168	655328	662879	559912	242007	94523.5	69911.5
MROSv2_20522	Methylocystis rosea SV97T chromosome MROS	Ubiquinol--cytochrome c reductase, cytochrome B subunit	Ubiquinol-cytochrome c reductase cytochrome c subunit	High	614749	603901	533269	445259	494631	333757	356266
MROSv2_20523	Methylocystis rosea SV97T chromosome MROS	Cytochrome c1	Ubiquinol-cytochrome c reductase cytochrome c subunit	High	1.92909e+06	1.61787e+06	1.78921e+06	1.67017e+06	891040	1.42713e+06	400485	20928.2
MROSv2_10476	Methylocystis rosea SV97T chromosome MROS	Alternative cytochrome c oxidase polypeptide CoxP	Cytochrome c oxidase subunit	High	666861	728814	727036	533176
MROSv2_10478	Methylocystis rosea SV97T chromosome MROS	Alternative cytochrome c oxidase subunit 1	Cytochrome c oxidase subunit	High	1.622e+06	1.70243e+06	1.70369e+06	831550
MROSv2_10479	Methylocystis rosea SV97T chromosome MROS	Alternative cytochrome c oxidase subunit 2	Cytochrome c oxidase subunit	High	8.25728e+06	6.02368e+06	6.65791e+06	5.32519e+06	76362.3	173550	71364.4
MROSv2_10598	Methylocystis rosea SV97T chromosome MROS	cytochrome bd-I ubiquinol oxidase subunit I	Cytochrome c oxidase subunit	High	62504.9	30999.1	36544.4	46058.1
MROSv2_11771	Methylocystis rosea SV97T chromosome MROS	Cytochrome c oxidase subunit 2	Cytochrome c oxidase subunit	High	3.75545e+06	3.97873e+06	3.69658e+06	2.31676e+06	74247.2	24807
MROSv2_11776	Methylocystis rosea SV97T chromosome MROS	Cytochrome c oxidase subunit 3	Cytochrome c oxidase subunit	High	277545	271136	132455	203569
MROSv2_21381	Methylocystis rosea SV97T chromosome MROS	Uptake hydrogenase large subunit	[NiFe] hydrogenase large subunit	High	299451	315105	459262	517782	2.43165e+07	4.68086e+06	4.1837e+06	3.22209e+06
MROSv2_21382	Methylocystis rosea SV97T chromosome MROS	Hydrogenase expression protein HypE	[NiFe] hydrogenase small subunit	High	8818.54	9367.37	59097.3	40478.1	574145	1.23764e+06	1.04577e+06	356131
MROSv2_11271	Methylocystis rosea SV97T chromosome MROS	NADH-quinone oxidoreductase subunit B	NADH-quinone oxidoreductase subunit B	High	1.03805e+06	907774	922625	547346
MROSv2_11272	Methylocystis rosea SV97T chromosome MROS	NADH-quinone oxidoreductase subunit C	NADH-quinone oxidoreductase subunit C	High	2.19298e+06	1.81956e+06	2.67342e+06	1.44757e+06	105383	44977.4	257780	38603.5
MROSv2_11273	Methylocystis rosea SV97T chromosome MROS	NADH-quinone oxidoreductase subunit D 1	NADH-quinone oxidoreductase subunit D	High	3.88097e+06	3.87702e+06	4.96268e+06	3.84725e+06	193573	102692	271043	139903
MROSv2_11274	Methylocystis rosea SV97T chromosome MROS	NADH-quinone oxidoreductase chain 2	NADH-quinone oxidoreductase subunit E	High	2.11249e+06	2.42559e+06	2.48165e+06	1.41128e+06	161684	130949	281097	59763.6
MROSv2_11275	Methylocystis rosea SV97T chromosome MROS	NADH:quinone oxidoreductase subunit F	NADH-quinone oxidoreductase subunit F	High	3.25185e+06	3.95161e+06	4.17571e+06	2.96007e+06	296702	115803	291121	214296
MROSv2_11276	Methylocystis rosea SV97T chromosome MROS	NADH-quinone oxidoreductase chain 3	NADH-quinone oxidoreductase subunit G	High	7.29505e+06	7.16871e+06	7.80784e+06	6.62147e+06	525849	65560.3	540982	242734
MROSv2_11278	Methylocystis rosea SV97T chromosome MROS	NADH-quinone oxidoreductase subunit I	NADH-quinone oxidoreductase subunit I	High	1.3871e+06	1.22814e+06	1.72611e+06	1.03006e+06	197485	61435.5	134740	71922.6
MROSv2_11279	Methylocystis rosea SV97T chromosome MROS	NADH-quinone oxidoreductase chain 10	NADH-quinone oxidoreductase subunit J	High	642105	595986	550374	466097	121958	79040.4	137431	55885.5
MROSv2_11280	Methylocystis rosea SV97T chromosome MROS	NADH-quinone oxidoreductase subunit K	NADH-quinone oxidoreductase subunit L	High	135550	149512	219641	92778.7
MROSv2_11281	Methylocystis rosea SV97T chromosome MROS	NADH-quinone oxidoreductase subunit L	NADH-quinone oxidoreductase subunit M	High	326792	410695	385948	285086
MROSv2_11282	Methylocystis rosea SV97T chromosome MROS	NADH-quinone oxidoreductase subunit M	NADH-quinone oxidoreductase subunit N	High	54454.2	61916.6	73396.1	53565.6
MROSv2_11283	Methylocystis rosea SV97T chromosome MROS	NADH-quinone oxidoreductase subunit N	NADH-quinone oxidoreductase subunit L	High	116340	109847	109457	104434
MROSv2_20025	Methylocystis rosea SV97T chromosome MROS	NADH:ubiquinone oxidoreductase 17.2 kD subunit	NADH-quinone oxidoreductase 17.2 kD subunit	High	614993	625741	708964	638244	36391.4		30898.8	44320.5
MROSv2_11763	Methylocystis rosea SV97T chromosome MROS	protein of unknown function	ATP synthase subunit	High	71237.5	121708	70384.8	78859.5	31908.6	147456	20303.3
MROSv2_11764	Methylocystis rosea SV97T chromosome MROS	ATP synthase subunit a	ATP synthase subunit	High	897604	835017	901535	640017	67061.9	111356	71763	39175.7
MROSv2_11766	Methylocystis rosea SV97T chromosome MROS	ATP synthase subunit b 1	ATP synthase subunit	High	9.37913e+06	7.97947e+06	6.77844e+06	5.78448e+06	859272	1.68871e+06	517563	140464
MROSv2_11767	Methylocystis rosea SV97T chromosome MROS	ATP synthase subunit b 1	ATP synthase subunit	High	5.11588e+06	6.03085e+06	6.53598e+06	4.50193e+06	286560	1.20679e+06	211476	229648
MROSv2_21466	Methylocystis rosea SV97T chromosome MROS	ATP synthase epsilon chain	ATP synthase subunit	High	9.71074e+06	8.03814e+06	7.41245e+06	5.60844e+06	1.16499e+06	1.47848e+06	675547	179699
MROSv2_21467	Methylocystis rosea SV97T chromosome MROS	ATP synthase F1 complex subunit beta	ATP synthase subunit	High	6.18374e+07	6.03372e+07	6.7032e+07	4.42908e+07	7.23474e+06	1.31962e+07	5.70021e+06	1.53837e+06
MROSv2_21468	Methylocystis rosea SV97T chromosome MROS	ATP synthase gamma chain	ATP synthase subunit	High	5.04408e+06	7.99106e+06	8.89564e+06	5.92101e+06	408160	1.32795e+06	203733	37717.3
MROSv2_21469	Methylocystis rosea SV97T chromosome MROS	ATP synthase F1 complex subunit alpha	ATP synthase subunit	High	6.70637e+07	7.1075e+07	7.6107e+07	5.63494e+07	6.83621e+06	1.54277e+07	6.18875e+06	3.57063e+06
MROSv2_21470	Methylocystis rosea SV97T chromosome MROS	ATP synthase subunit delta	ATP synthase subunit	High	3.79702e+06	6.20191e+06	8.00837e+06	5.16061e+06	92548.6	772907	65499.7	80448.1
MPAL_v1_370178	Methylocapsa palsarum NE2 WGS MPAL	Particulate methane monooxygenase alpha subunit	Particulate methane monooxygenase alpha	High	3858534189	2503173050	7178141651	2303080780	14390188485	12885073820	13686395089	13812587071
MPAL_v1_370179	Methylocapsa palsarum NE2 WGS MPAL	Particulate methane monooxygenase beta subunit	Particulate methane monooxygenase beta	High	5.58739e+08	3.65478e+08	1001587453	3.35485e+08	2019985395	1915139057	1878388410	2020789866
MPAL_v1_370180	Methylocapsa palsarum NE2 WGS MPAL	Particulate methane monooxygenase gamma subunit	Particulate methane monooxygenase gamma	High	3.3967e+07	2.5142e+07	9.90891e+07	2.95217e+07	6.26577e+08	514348326	6.01345e+08	5.22879e+08
MPAL_v1_350017	Methylocapsa palsarum NE2 WGS MPAL	Methanol dehydrogenase [cytochrome c] subunit 1	Methanol dehydrogenase	High	3.76528e+08	563042609	4.36332e+07	559685095	1237334906	1433799062	9.14285e+08	1231781759
MPAL_v1_350020	Methylocapsa palsarum NE2 WGS MPAL	Methanol dehydrogenase [cytochrome c] subunit 2	Methanol dehydrogenase	High	2.04498e+07	3.63167e+07	1.98304e+06	3.56519e+07	7.13296e+07	8.9792e+07	5.65891e+07	7.45428e+07
MPAL_v1_370060	Methylocapsa palsarum NE2 WGS MPAL	putative dehydrogenase XoxF	Methanol dehydrogenase xoxF	High	1228804008	1021923951	1679235682	915507725	6.15449e+07	5.92183e+07	7.16241e+07	6.28598e+07
MPAL_v1_400110	Methylocapsa palsarum NE2 WGS MPAL	5,6,7,8-tetrahydromethanopterin hydro-lyase	Formaldehyde activating enzyme	High	1.05308e+07	1.20218e+07	9.09928e+06	9.93714e+06	6.0815e+06	6.2302e+06	6.33842e+06	7.23662e+06
MPAL_v1_460097	Methylocapsa palsarum NE2 WGS MPAL	5,6,7,8-tetrahydromethanopterin hydro-lyase	Formaldehyde activating enzyme	High	2242831565	2053129897	1983803313	2062357451	1473655157	1524954809	1386755642	1612282023
MPAL_v1_460092	Methylocapsa palsarum NE2 WGS MPAL	NAD(P)-dependent methylenetetrahydromethanopterin dehydrogenase	NAD(P)-dependent methylenetetrahydromethanopterin dehydrogenase	High	2.15811e+08	2.434e+08	1.59616e+08	2.39377e+08	8.94877e+07	9.93978e+07	1.03141e+08	9.32673e+07
MPAL_v1_460094	Methylocapsa palsarum NE2 WGS MPAL	Methenyltetrahydromethanopterin cyclohydrolase	Methenyltetrahydromethanopterin cyclohydrolase	High	1.00547e+08	9.87386e+07	6.32755e+07	9.87138e+07	3.96247e+07	4.17338e+07	3.73036e+07	4.21115e+07
MPAL_v1_460109	Methylocapsa palsarum NE2 WGS MPAL	formylmethanofuran dehydrogenase subunit B	Formyltransferase/hydrolase complex	High	1.07733e+08	1.13668e+08	7.22961e+07	1.07199e+08	6.39894e+07	6.00534e+07	7.30492e+07	6.38742e+07
MPAL_v1_460110	Methylocapsa palsarum NE2 WGS MPAL	Formyltransferase/hydrolase complex Fhc subunit A	Formyltransferase/hydrolase complex	High	6.969e+07	6.47377e+07	4.73026e+07	5.92001e+07	4.43832e+07	4.32579e+07	5.29504e+07	4.79533e+07
MPAL_v1_460111	Methylocapsa palsarum NE2 WGS MPAL	Formylmethanofuran--tetrahydromethanopterin formyltransferase	Formyltransferase/hydrolase complex	High	6.94579e+07	7.09965e+07	3.53127e+07	6.8007e+07	2.9506e+07	3.53563e+07	4.52878e+07	3.5624e+07
MPAL_v1_460112	Methylocapsa palsarum NE2 WGS MPAL	Formyltransferase/hydrolase complex Fhc subunit C	Formyltransferase/hydrolase complex	High	4.62987e+07	5.04794e+07	2.66432e+07	4.83607e+07	2.4356e+07	2.36906e+07	2.72228e+07	2.54873e+07
MPAL_v1_460020	Methylocapsa palsarum NE2 WGS MPAL	Formate dehydrogenase	NAD dependent Formate dehydrogenase	High	342914	183818	199641	215353	4.35599e+06	8.7593e+06	4.68749e+06	7.86373e+06
MPAL_v1_460471	Methylocapsa palsarum NE2 WGS MPAL	Formate dehydrogenase iron-sulfur subunit	molybdopterin dependent formate dehydrogenase	High	5952026	6.73605e+06	4.56096e+06	5.5382e+06	1.35682e+06	1.30405e+06	1.33371e+06	1.57556e+06
MPAL_v1_470008	Methylocapsa palsarum NE2 WGS MPAL	formate dehydrogenase beta subunit	molybdopterin dependent formate dehydrogenase	High	4.75786e+07	5.7443e+07	4.56588e+07	5.13022e+07	1.60881e+07	1.6539e+07	2.65716e+07	2.00283e+07
MPAL_v1_470009	Methylocapsa palsarum NE2 WGS MPAL	formate dehydrogenase major subunit	molybdopterin dependent formate dehydrogenase	High	52575989	6.41522e+07	4.86424e+07	5.05969e+07	2.14846e+07	2.06923e+07	2.94886e+07	2.2276e+07
MPAL_v1_470010	Methylocapsa palsarum NE2 WGS MPAL	Sulfur carrier protein FdhD	molybdopterin dependent formate dehydrogenase	High	963520	751734	575672	700677	891240	1.19428e+06	978292	1.04182e+06
MPAL_v1_460080	Methylocapsa palsarum NE2 WGS MPAL	Formate--tetrahydrofolate ligase	Formate--tetrahydrofolate ligase	High	3.52977e+08	3.54793e+08	2.45683e+08	3.66429e+08	115511698	1.20928e+08	1.2746e+08	1.2109e+08
MPAL_v1_460413	Methylocapsa palsarum NE2 WGS MPAL	Methylenetetrahydrofolate dehydrogenase / Methenyltetrahydrofolate cyclohydrolase	methylene-tetrahydrofolate dehydrogenase/methylene-tetrahydrofolate cyclohydrolase	High	231113618	2.46137e+08	1.6606e+08	2.43873e+08	5.01611e+07	4.75025e+07	4.70651e+07	5.24355e+07
MPAL_v1_460544	Methylocapsa palsarum NE2 WGS MPAL	glycine cleavage system H protein	Glycine cleavage system H protein	High	14660750	1.36639e+07	9.97382e+06	1.17074e+07	2.70542e+06	4.01805e+06	3.3351e+06	3.36349e+06
MPAL_v1_460543	Methylocapsa palsarum NE2 WGS MPAL	aminomethyltransferase	Aminomethyltransferase	High	2.13602e+07	1.8592e+07	1.63661e+07	1.67631e+07	6.8335e+06	1.20315e+07	9.22391e+06	8.93177e+06
MPAL_v1_460545	Methylocapsa palsarum NE2 WGS MPAL	putative glycine dehydrogenase (decarboxylating) subunit 1	Putative glycine dehydrogenase subunit 2	High	3.2433e+07	3.24147e+07	1.54178e+07	3.77217e+07	6.90932e+06	5.94639e+06	5.40257e+06	7.38515e+06
MPAL_v1_460546	Methylocapsa palsarum NE2 WGS MPAL	putative glycine dehydrogenase (decarboxylating) subunit 2	Putative glycine dehydrogenase subunit 1	High	1.98243e+07	1.78052e+07	4.9814e+06	1.41025e+07	1.35708e+06	1.96142e+06	1.94232e+06	1.85493e+06
MPAL_v1_430048	Methylocapsa palsarum NE2 WGS MPAL	Dihydrolipoyl dehydrogenase	Dihydrolipoyl dehydrogenase	High	2.63676e+07	2.51343e+07	1.53495e+07	2.48052e+07	2.08421e+07	1.94002e+07	2.66599e+07	1.98591e+07
MPAL_v1_470092	Methylocapsa palsarum NE2 WGS MPAL	Dihydrolipoyl dehydrogenase	Dihydrolipoyl dehydrogenase	High	8.96213e+06	9.23491e+06	4.48065e+06	9.01133e+06	1.60358e+07	1.48016e+07	1.80096e+07	1.60542e+07
MPAL_v1_460398	Methylocapsa palsarum NE2 WGS MPAL	serine hydroxymethyltransferase	Serine hydroxymethyltransferase	High	482839157	5.26409e+08	4.228e+08	532528306	9.79576e+07	1.11447e+08	144359740	1.16379e+08
MPAL_v1_460082	Methylocapsa palsarum NE2 WGS MPAL	Serine--glyoxylate aminotransferase	Serine--glyoxylate aminotransferase	High	7.77326e+08	8.72432e+08	4.888e+08	9.20751e+08	1.87847e+08	187842852	1.75998e+08	2.21527e+08
MPAL_v1_460081	Methylocapsa palsarum NE2 WGS MPAL	Glycerate dehydrogenase	Glycerate dehydrogenase	High	1.54751e+08	1.65115e+08	100599791	1.58936e+08	3.7471e+07	3.72431e+07	4.05823e+07	4.11626e+07
MPAL_v1_460083	Methylocapsa palsarum NE2 WGS MPAL	putative hydroxypyruvate reductase	2-glycerate kinase	High	4.63531e+07	4.26315e+07	2.63467e+07	3.70107e+07	2.62453e+07	2.96107e+07	3.3458e+07	3.03314e+07
MPAL_v1_470085	Methylocapsa palsarum NE2 WGS MPAL	enolase	enolase	High	279179561	2.82637e+08	2.08773e+08	2.96073e+08	1.63632e+08	1.74995e+08	1.99542e+08	1.82002e+08
MPAL_v1_460087	Methylocapsa palsarum NE2 WGS MPAL	Phosphoenolpyruvate carboxylase	Phosphoenolpyruvate carboxylase	High	1.47797e+08	1.38857e+08	9.16927e+07	1.22922e+08	1.04678e+08	9.72486e+07	1.17309e+08	1.06072e+08
MPAL_v1_470206	Methylocapsa palsarum NE2 WGS MPAL	Phosphoenolpyruvate carboxylase	Phosphoenolpyruvate carboxylase	High	1.3472e+08	1.37505e+08	7.79732e+07	1.20369e+08	1.56567e+07	1.69843e+07	1.48278e+07	2.28741e+07
MPAL_v1_260182	Methylocapsa palsarum NE2 WGS MPAL	NADP(+)-dependent malate dehydrogenase	Malate dehydrogenase	High	1.41114e+07	1.39261e+07	7.96629e+06	1.29496e+07	6.28901e+06	6.31001e+06	6.3251e+06	6.63361e+06
MPAL_v1_430053	Methylocapsa palsarum NE2 WGS MPAL	Malate dehydrogenase	Malate dehydrogenase	High	1.12425e+08	1.16328e+08	8.4376e+07	1.27727e+08	4.20631e+07	4.52574e+07	3.75222e+07	4.23469e+07
MPAL_v1_430051	Methylocapsa palsarum NE2 WGS MPAL	succinyl-CoA synthetase subunit alpha	malate-CoA ligase alpha subunit	High	2.89136e+07	2.76459e+07	1.93188e+07	2.87279e+07	2.29181e+07	2.59282e+07	2.73277e+07	2.20541e+07
MPAL_v1_430052	Methylocapsa palsarum NE2 WGS MPAL	succinyl-CoA synthetase subunit beta	malate-CoA ligase beta subunit	High	5.64497e+07	5.1682e+07	3.02024e+07	5.18801e+07	4.60907e+07	4.37204e+07	4.37618e+07	4.19429e+07
MPAL_v1_460085	Methylocapsa palsarum NE2 WGS MPAL	succinyl-CoA synthetase subunit beta	malate-CoA ligase beta subunit	High	5.09697e+08	5.48538e+08	4.05378e+08	5.65161e+08	2.12058e+08	1.89196e+08	2.31064e+08	2.26896e+08
MPAL_v1_460086	Methylocapsa palsarum NE2 WGS MPAL	succinyl-CoA synthetase subunit alpha	malate-CoA ligase alpha subunit	High	2.16868e+08	2.23873e+08	1.24048e+08	2.64797e+08	8.11947e+07	8.59272e+07	8.42651e+07	7.28506e+07
MPAL_v1_460088	Methylocapsa palsarum NE2 WGS MPAL	L-malyl-CoA/beta-methylmalyl-CoA lyase	L-malyl-CoA	High	5.41785e+08	5.69098e+08	2.93644e+08	5.58361e+08	2.22681e+08	213681021	2.35771e+08	227040939
MPAL_v1_550186	Methylocapsa palsarum NE2 WGS MPAL	biotin carboxylase	acetyl-CoA carboxylase, biotin carboxylase subunit	High	2.63902e+07	2.77151e+07	1.10382e+07	2.60532e+07	1.28661e+07	1.17127e+07	1.47052e+07	1.27195e+07
MPAL_v1_550187	Methylocapsa palsarum NE2 WGS MPAL	Biotin carboxyl carrier protein of acetyl-CoA carboxylase	Acetyl CoA carboxylase, BCCP subunit	High	5.69482e+07	7.11834e+07	3.56284e+07	6.53641e+07	1.83075e+07	2.046e+07	2.45934e+07	2.17914e+07
MPAL_v1_560175	Methylocapsa palsarum NE2 WGS MPAL	acetyl-CoA carboxyltransferase subunit beta	Acetyl-CoA carboxylase, beta (carboxyltranferase) subunit	High	1.09439e+07	1.13049e+07	6.64076e+06	1.23732e+07	6.20519e+06	5.87935e+06	8.74158e+06	7.18256e+06
MPAL_v1_460461	Methylocapsa palsarum NE2 WGS MPAL	ubiquinol-cytochrome c reductase cytochrome c1 subunit	Ubiquinol-cytochrome c reductase cytochrome c subunit	High	4.4912e+07	4.68344e+07	3.307e+07	4.46573e+07	1.68343e+07	2.47297e+07	2.55568e+07	2.45763e+07
MPAL_v1_460462	Methylocapsa palsarum NE2 WGS MPAL	ubiquinol-cytochrome c reductase cytochrome b subunit	Ubiquinol-cytochrome c reductase cytochrome c subunit	High	1.6529e+07	1.80842e+07	8.87139e+06	1.76789e+07	7.31716e+06	7.89664e+06	9.09902e+06	1.13159e+07
MPAL_v1_460463	Methylocapsa palsarum NE2 WGS MPAL	Ubiquinol-cytochrome c reductase iron-sulfur subunit	Ubiquinol-cytochrome c reductase cytochrome c subunit	High	2.02331e+07	2.29839e+07	1.31087e+07	1.90589e+07	9.22393e+06	8.58555e+06	1.08809e+07	9.49834e+06
MPAL_v1_260166	Methylocapsa palsarum NE2 WGS MPAL	Cytochrome c oxidase subunit 3	Cytochrome c oxidase subunit	High	6.88091e+06	8.06083e+06	4.94028e+06	7.93881e+06	3.68667e+06	2.60891e+06	2.49267e+06	3.14555e+06
MPAL_v1_260167	Methylocapsa palsarum NE2 WGS MPAL	Cytochrome c oxidase assembly protein CtaG	Cytochrome c oxidase subunit	High	2.14214e+06	2.83175e+06	2.17976e+06	2.18414e+06	974238	1.15946e+06	1.52815e+06	3.18506e+06
MPAL_v1_260169	Methylocapsa palsarum NE2 WGS MPAL	cytochrome bo3 ubiquinol oxidase subunit 1	Cytochrome c oxidase subunit	High	8.46694e+06	1.4938e+07	6.68159e+06	1.32215e+07	6.3476e+06	5.29049e+06	4.22859e+06	4.87934e+06
MPAL_v1_260170	Methylocapsa palsarum NE2 WGS MPAL	cytochrome c oxidase subunit II	Cytochrome c oxidase subunit	High	4.05312e+07	4.66658e+07	3.7189e+07	4.12565e+07	1.49087e+07	1.53091e+07	1.91715e+07	1.96414e+07
MPAL_v1_370160	Methylocapsa palsarum NE2 WGS MPAL	Aa3 type cytochrome c oxidase subunit IV	Cytochrome c oxidase subunit	High	1.25828e+06	2.26105e+06	1.46129e+06	3.3661e+06	1.49181e+06	629469	137748	127751
MPAL_v1_370206	Methylocapsa palsarum NE2 WGS MPAL	Cytochrome c oxidase subunit 1 homolog	Cytochrome c oxidase subunit	High	1.21771e+06	1.74775e+06	303803	1.61339e+06	373535	323514	348736	375179
MPAL_v1_370207	Methylocapsa palsarum NE2 WGS MPAL	cytochrome c oxidase cbb3-type subunit II	Cytochrome c oxidase subunit	High	1.21171e+07	9.72525e+06	2.62965e+06	9.16143e+06	3.86424e+06	3.70874e+06	3.16164e+06	3.72995e+06
MPAL_v1_370209	Methylocapsa palsarum NE2 WGS MPAL	Cbb3-type cytochrome c oxidase subunit FixP	Cytochrome c oxidase subunit	High	2.56467e+07	2.23811e+07	9.44905e+06	2.08883e+07	7.41418e+06	7.22757e+06	6.17512e+06	7.07646e+06
MPAL_v1_460202	Methylocapsa palsarum NE2 WGS MPAL	cytochrome bd ubiquinol oxidase subunit I	Cytochrome c oxidase subunit	High	260524	338596	231005	385195	432165	189026	554753	715065
MPAL_v1_460203	Methylocapsa palsarum NE2 WGS MPAL	cytochrome bd ubiquinol oxidase subunit II	Cytochrome c oxidase subunit	Medium	62507	47699.6		41258.1	98587.1	34120.9	77127.4	62556.8
MPAL_v1_550336	Methylocapsa palsarum NE2 WGS MPAL	NADH-quinone oxidoreductase subunit A 1	NADH-quinone oxidoreductase subunit A	High	2.10411e+06	2.21262e+06	764542	1.95142e+06	173216	195365		253423
MPAL_v1_550337	Methylocapsa palsarum NE2 WGS MPAL	NADH-quinone oxidoreductase subunit B	NADH-quinone oxidoreductase subunit B	High	7.57189e+06	8.18184e+06	4.70944e+06	6.64019e+06	1.56342e+06	1.7152e+06	1.71944e+06	1.80254e+06
MPAL_v1_550338	Methylocapsa palsarum NE2 WGS MPAL	NADH-quinone oxidoreductase subunit C	NADH-quinone oxidoreductase subunit C	High	2.9525e+07	3.23107e+07	1.37312e+07	2.69344e+07	6.18726e+06	6.96266e+06	6.39327e+06	7.15308e+06
MPAL_v1_550339	Methylocapsa palsarum NE2 WGS MPAL	NADH-quinone oxidoreductase subunit D 1	NADH-quinone oxidoreductase subunit D	High	4.13962e+07	4.2027e+07	3.48223e+07	4.18422e+07	5.95955e+06	5.35474e+06	8.29886e+06	7.97778e+06
MPAL_v1_550340	Methylocapsa palsarum NE2 WGS MPAL	NADH-quinone oxidoreductase subunit E	NADH-quinone oxidoreductase subunit E	High	1.73887e+07	1.79026e+07	6.51943e+06	1.51416e+07	2.03822e+06	2.98052e+06	3.34558e+06	2.86265e+06
MPAL_v1_550341	Methylocapsa palsarum NE2 WGS MPAL	NADH:quinone oxidoreductase subunit F	NADH-quinone oxidoreductase subunit F	High	3.9405e+07	4.44885e+07	2.0341e+07	3.85098e+07	7.59993e+06	8.07921e+06	1.04439e+07	7.73933e+06
MPAL_v1_550342	Methylocapsa palsarum NE2 WGS MPAL	NADH-quinone oxidoreductase chain 3	NADH-quinone oxidoreductase subunit G	High	7.74768e+07	7.46647e+07	3.92562e+07	6.7867e+07	1.36958e+07	1.38276e+07	16786897	1.62849e+07
MPAL_v1_550343	Methylocapsa palsarum NE2 WGS MPAL	NADH:quinone oxidoreductase subunit H	NADH-quinone oxidoreductase subunit H	High	2.15548e+06	2.09289e+06	1.08003e+06	2.61017e+06	517702	310503	209305	511820
MPAL_v1_550344	Methylocapsa palsarum NE2 WGS MPAL	NADH-quinone oxidoreductase subunit I	NADH-quinone oxidoreductase subunit I	High	1.63612e+07	1.81137e+07	7.40331e+06	1.70993e+07	3.33519e+06	3.38973e+06	2.73199e+06	3.24125e+06
MPAL_v1_550345	Methylocapsa palsarum NE2 WGS MPAL	NADH-quinone oxidoreductase subunit J	NADH-quinone oxidoreductase subunit J	High	7.68224e+06	8.5039e+06	5.54393e+06	8.55712e+06	1.96039e+06	1.94252e+06	2.50848e+06	2.57013e+06
MPAL_v1_550346	Methylocapsa palsarum NE2 WGS MPAL	NADH-quinone oxidoreductase subunit K	NADH-quinone oxidoreductase subunit K	High	1.02429e+06	1.57296e+06		1.50697e+06	232745	287036	438800	254940
MPAL_v1_550347	Methylocapsa palsarum NE2 WGS MPAL	NADH-quinone oxidoreductase chain 12	NADH-quinone oxidoreductase subunit L	High	11756612	1.21399e+07	5.99599e+06	1.16259e+07	1.24723e+06	1.17012e+06	1.61797e+06	1.40098e+06
MPAL_v1_550348	Methylocapsa palsarum NE2 WGS MPAL	NADH-quinone oxidoreductase subunit M	NADH-quinone oxidoreductase subunit M	High	9.75944e+06	1.02329e+07	4.04184e+07	1.0771e+07	8.02447e+06	6.13988e+06	1.70451e+07	8.13237e+06
MPAL_v1_550349	Methylocapsa palsarum NE2 WGS MPAL	NADH-quinone oxidoreductase subunit N	NADH-quinone oxidoreductase subunit N	High	1.99336e+06	2.33194e+06	1.12179e+06	2.74254e+06	424404	354615	327388	495972
MPAL_v1_460547	Methylocapsa palsarum NE2 WGS MPAL	ATP synthase subunit b 1	ATP synthase subunit	High	6.56919e+07	7.43785e+07	3.06998e+07	8.22519e+07	2.88865e+07	2.38955e+07	2.14404e+07	21413736
MPAL_v1_460548	Methylocapsa palsarum NE2 WGS MPAL	F-type H+-transporting ATPase subunit b	ATP synthase subunit	High	1.49995e+08	1.74443e+08	8.24107e+07	1.69128e+08	4.38405e+07	4.25358e+07	6.1728e+07	5.00698e+07
MPAL_v1_460549	Methylocapsa palsarum NE2 WGS MPAL	ATP synthase subunit c	ATP synthase subunit	High	7.96821e+07	8.63798e+07	3.83675e+07	7.17584e+07	1.78013e+07	1.7338e+07	2.00014e+07	2.11217e+07
MPAL_v1_460550	Methylocapsa palsarum NE2 WGS MPAL	ATP synthase subunit a	ATP synthase subunit	High	575018	667912	469851	1.15405e+06	238997	202845	97904.6	404662
MPAL_v1_460551	Methylocapsa palsarum NE2 WGS MPAL	ATP synthase protein I	ATP synthase subunit	High	3.24013e+06	3.12948e+06	2.03058e+06	2.79091e+06	1.82173e+06	2.43966e+06	1.8864e+06	2.00414e+06
MPAL_v1_570110	Methylocapsa palsarum NE2 WGS MPAL	ATP synthase F1 complex subunit alpha	ATP synthase subunit	High	8.0836e+08	9.28878e+08	4.98047e+08	8.81037e+08	2.64981e+08	2.54697e+08	311811400	2.89817e+08
MPAL_v1_570111	Methylocapsa palsarum NE2 WGS MPAL	ATP synthase subunit delta	ATP synthase subunit	High	9.87817e+07	1.16623e+08	4.68958e+07	1.43254e+08	3.7027e+07	3.23506e+07	3.18787e+07	3.29722e+07
MPAL_v1_570112	Methylocapsa palsarum NE2 WGS MPAL	ATP synthase gamma chain	ATP synthase subunit	High	9.25522e+07	107495793	6.30091e+07	9.67701e+07	2.68405e+07	2.39392e+07	2.75486e+07	2.70932e+07
MPAL_v1_570113	Methylocapsa palsarum NE2 WGS MPAL	ATP synthase F1 complex subunit beta	ATP synthase subunit	High	6.90966e+08	7.96683e+08	3.5096e+08	7.66913e+08	2.31384e+08	2.28616e+08	2.62659e+08	2.56396e+08
MPAL_v1_570114	Methylocapsa palsarum NE2 WGS MPAL	ATP synthase epsilon chain	ATP synthase subunit	High	3.28176e+07	3.89823e+07	2.20859e+07	3.92335e+07	8.56151e+06	7.90957e+06	1.13543e+07	1.00174e+07
MPAL_v1_570123	Methylocapsa palsarum NE2 WGS MPAL	S-(hydroxymethyl)glutathione dehydrogenase	S-(hydroxymethyl)glutathione dehydrogenase	High	7.49201e+07	8.65473e+07	5.09531e+07	8.4358e+07	3.87161e+07	3.39531e+07	4.69201e+07	4.54873e+07
MPAL_v1_620021	Methylocapsa palsarum NE2 WGS MPAL	S-(hydroxymethyl)glutathione dehydrogenase	S-(hydroxymethyl)glutathione dehydrogenase	High					68342	72227.7	244578	135973
MPAL_v1_570124	Methylocapsa palsarum NE2 WGS MPAL	S-formylglutathione hydrolase FrmB	S-formylglutathione hydrolase	High	3.00522e+07	3.24301e+07	15365440	3.03782e+07	1.66357e+07	1.55894e+07	1.89361e+07	1.67707e+07

## Sheet: S6 -Comparative proteomics MG08
Proteome Discoverer 3.0 output of Methylocapsa gorgona MG08 proteome data
Unfiltered proteome data used for comparative proteomics analyses. Protein FDR Confidence: Combined - level of confidence of the identified protein groups, Label - Gene ID used by Microscope platform, Description - protein designation by Microscope platform, Exp. q-value: Combined - displays the q-values derived from the validation, Coverage [%] - percentage of the protein sequences covered by id…
Protein FDR Confidence: Combined	Label	Description	Exp. q-value: Combined	Coverage [%]	# Peptides	# PSMs	# Unique Peptides	# AAs	Abundances (Normalized): F14: Sample, 1000ppm	Abundances (Normalized): F15: Sample, 1000ppm	Abundances (Normalized): F16: Sample, 1000ppm	Abundances (Normalized): F18: Sample, 1000ppm	Abundances (Normalized): F17: Sample, atm	Abundances (Normalized): F19: Sample, atm	Abundances (Normalized): F20: Sample, atm	Abundances (Normalized): F21: Sample, atm
High	MS08_v1_2580	ID:23318311 Amino acid adenylation domain protein [Beijerinckiaceae Ms08]	0	66	73	870	73	1391	6.69626e+08	5.48285e+08	2.09092e+09	1.497e+08	2.10448e+08	1.83298e+08	2.38928e+08	3.94181e+08
High	MS08_v1_1812	ID:23317543 Apolipoprotein A1/A4/E (fragment) [Beijerinckiaceae Ms08]	0	76	106	1097	106	1733	1.54369e+08	1.4314e+08	1.2087e+08	1.65874e+08	1.64583e+07	1.32939e+07	2.9505e+07	1.50003e+07
High	MS08_v1_0469	ID:23316200 rpoB| RNA polymerase, beta subunit [Beijerinckiaceae Ms08]	0	62	80	1610	80	1377	2.36248e+08	2.35964e+08	1.65889e+08	2.23121e+08	1.73481e+08	1.75055e+08	1.80942e+08	1.87787e+08
High	MS08_v1_1600	ID:23317331 moxF| Methanol dehydrogenase [cytochrome c] subunit 1 [Beijerinckiaceae Ms08]	0	68	42	4194	42	629	4.71629e+09	4.6952e+09	4.07018e+09	4.95906e+09	1.41832e+09	1.69243e+09	7.61297e+08	1.45794e+09
High	MS08_v1_0468	ID:23316199 rpoC| DNA-directed RNA polymerase beta' chain (Transcriptase beta' chain) (RNA polymerase beta' subunit) [Beijerinckiaceae Ms08]	0	66	79	1319	79	1400	2.68657e+08	2.85181e+08	1.71815e+08	2.37383e+08	1.77954e+08	1.85858e+08	1.78542e+08	1.86167e+08
High	MS08_v1_0648	ID:23316379 groEL| chaperone Hsp60, peptide-dependent ATPase, heat shock protein [Beijerinckiaceae Ms08]	0	70	37	1731	37	547	1.397e+09	1.43796e+09	1.04914e+09	1.32084e+09	6.42988e+08	6.72113e+08	8.08692e+08	7.25156e+08
High	MS08_v1_0049	ID:23315780 Alpha-2-macroglobulin domain protein [Beijerinckiaceae Ms08]	0	58	87	989	87	1759	6.20746e+07	5.68622e+07	5.12942e+07	6.20167e+07	9.8151e+07	8.91719e+07	6.48366e+07	9.73327e+07
High	MS08_v1_2005	ID:23317736 gltB| glutamate synthase, large subunit [Beijerinckiaceae Ms08]	0	51	63	492	63	1558	4.41918e+07	4.9979e+07	3.09313e+07	5.21278e+07	8.30895e+06	9.19784e+06	8.71522e+06	1.10588e+07
High	MS08_v1_0708	ID:23316439 clpB| protein disaggregation chaperone [Beijerinckiaceae Ms08]	0	71	61	832	61	865	1.20462e+08	1.22476e+08	7.78054e+07	1.08809e+08	5.43328e+07	6.13295e+07	6.80554e+07	6.17903e+07
High	MS08_v1_1864	ID:23317595 atpD| membrane-bound ATP synthase , F1 sector, beta-subunit [Beijerinckiaceae Ms08]	0	84	32	789	32	483	4.71798e+08	5.04131e+08	3.11233e+08	4.19618e+08	8.73228e+07	1.02201e+08	9.56169e+07	1.03758e+08
High	MS08_v1_0463	ID:23316194 fusA| protein chain elongation factor EF-G, GTP-binding [Beijerinckiaceae Ms08]	0	73	39	747	39	691	1.88488e+08	1.90302e+08	1.12201e+08	1.55104e+08	5.88052e+07	7.50731e+07	7.31148e+07	7.00003e+07
High	MS08_v1_1008	ID:23316739 dnaK| chaperone Hsp70, co-chaperone with DnaJ [Beijerinckiaceae Ms08]	0	61	40	1194	40	713	4.5117e+08	4.84227e+08	2.79845e+08	4.30187e+08	2.47273e+08	2.83172e+08	3.86002e+08	3.00927e+08
High	MS08_v1_1505	ID:23317236 bamA| Outer membrane protein assembly factor BamA [Beijerinckiaceae Ms08]	0	56	41	856	41	816	2.49625e+08	2.45781e+08	1.18903e+08	2.6991e+08	1.02943e+08	1.91773e+08	3.61356e+08	1.96097e+08
High	MS08_v1_2064	ID:23317795 secA| preprotein translocase subunit, ATPase [Beijerinckiaceae Ms08]	0	62	58	752	58	937	1.02361e+08	1.07948e+08	5.60324e+07	9.80644e+07	7.80466e+07	7.61073e+07	9.8374e+07	8.14107e+07
High	MS08_v1_1844	ID:23317575 sgaA| Serine--glyoxylate aminotransferase [Beijerinckiaceae Ms08]	0	79	27	981	27	412	5.92748e+08	5.77432e+08	4.19047e+08	5.00106e+08	1.66914e+08	1.89837e+08	1.37313e+08	1.78232e+08
High	MS08_v1_1341	ID:23317072 pnp| polynucleotide phosphorylase/polyadenylase [Beijerinckiaceae Ms08]	0	68	39	848	39	714	2.81036e+08	2.7479e+08	1.90946e+08	2.44114e+08	9.14086e+07	8.899e+07	1.1041e+08	8.88333e+07
High	MS08_v1_1100	ID:23316831 acnA| aconitate hydratase 1 [Beijerinckiaceae Ms08]	0	54	40	651	40	909	5.9441e+07	6.72961e+07	8.01399e+07	1.15996e+08	7.02848e+07	7.35356e+07	7.21071e+07	8.35068e+07
High	MS08_v1_2142	ID:23317873 pmoB| Particulate methane monooxygenase alpha subunit [Beijerinckiaceae Ms08]	0	65	29	4844	29	426	1.00406e+10	1.02437e+10	1.14176e+10	1.13283e+10	4.66738e+09	3.80001e+09	4.12621e+09	3.78703e+09
High	MS08_v1_0462	ID:23316193 tufB| protein chain elongation factor EF-Tu, possible GTP-binding factor (duplicate of tufA) [Beijerinckiaceae Ms08]	0	66	22	848	22	396	5.93684e+08	6.26369e+08	4.19451e+08	5.55113e+08	2.37697e+08	3.13955e+08	2.92933e+08	2.8395e+08
High	MS08_v1_0592	ID:23316323 lon| DNA-binding ATP-dependent protease La [Beijerinckiaceae Ms08]	0	59	44	822	44	805	1.15844e+08	1.21434e+08	5.03076e+07	7.19291e+07	1.03694e+08	1.04184e+08	1.29085e+08	1.17596e+08
High	MS08_v1_0501	ID:23316232 PpiC-type peptidyl-prolyl cis-trans isomerase [Beijerinckiaceae Ms08]	0	64	37	606	37	638	1.16527e+08	1.2395e+08	7.49572e+07	9.75863e+07	6.31408e+07	5.67151e+07	4.63036e+07	6.12932e+07
High	MS08_v1_3271	ID:23319002 ilvD| Dihydroxy-acid dehydratase 2 [Beijerinckiaceae Ms08]	0	71	30	448	29	576	6.34075e+07	5.92194e+07	9.54458e+07	7.56799e+07	1.96287e+07	2.66213e+07	1.65212e+07	2.22818e+07
High	MS08_v1_1543	ID:23317274 metK| methionine adenosyltransferase 1 [Beijerinckiaceae Ms08]	0	68	26	722	26	448	3.36999e+08	3.24341e+08	3.89607e+08	3.16206e+08	6.726e+07	6.45736e+07	7.69124e+07	9.77368e+07
High	MS08_v1_1371	ID:23317102 rpsA| 30S ribosomal protein S1 [Beijerinckiaceae Ms08]	0	58	33	599	33	591	1.84764e+08	1.87501e+08	1.17641e+08	1.56377e+08	6.62443e+07	8.21904e+07	6.50888e+07	7.37752e+07
High	MS08_v1_1866	ID:23317597 atpA| F1 sector of membrane-bound ATP synthase, alpha subunit [Beijerinckiaceae Ms08]	0	62	29	816	29	509	4.49421e+08	4.63791e+08	2.62799e+08	3.87248e+08	9.01156e+07	1.06002e+08	1.04991e+08	1.0422e+08
High	MS08_v1_0781	ID:23316512 ftsH| protease, ATP-dependent zinc-metallo [Beijerinckiaceae Ms08]	0	55	33	601	33	641	2.22477e+08	2.25997e+08	1.32972e+08	1.71392e+08	6.76265e+07	6.85026e+07	8.02084e+07	6.42619e+07
High	MS08_v1_0912	ID:23316643 pepN| Aminopeptidase N [Beijerinckiaceae Ms08]	0	56	42	540	42	890	6.26122e+07	6.33914e+07	2.16719e+07	3.90454e+07	4.95705e+07	4.03005e+07	4.16241e+07	5.65806e+07
High	MS08_v1_1732	ID:23317463 atoB| acetyl-CoA acetyltransferase [Beijerinckiaceae Ms08]	0	80	22	525	22	391	1.78926e+08	1.77342e+08	1.27542e+08	1.65094e+08	5.60775e+07	6.58846e+07	4.72986e+07	6.15671e+07
High	MS08_v1_1856	ID:23317587 Formate dehydrogenase [Beijerinckiaceae Ms08]	0	83	31	558	31	401	6.23766e+06	5.60719e+06	3.31208e+07	5.47565e+06	6.3238e+08	8.57304e+08	5.76069e+08	8.27621e+08
High	MS08_v1_0222	ID:23315953 putative [NiFe] hydrogenase large subunit [Beijerinckiaceae Ms08]	0	68	35	819	35	603	3.81988e+06	3.37111e+06	6.71627e+06	6.79886e+06	1.04589e+09	1.01381e+09	7.35251e+08	9.68959e+08
High	MS08_v1_1653	ID:23317384 pyc| Pyruvate carboxylase [Beijerinckiaceae Ms08]	0	54	51	349	51	1147	2.84069e+07	2.67024e+07	1.39226e+07	2.05951e+07	9.82273e+06	1.02844e+07	7.92047e+06	9.16191e+06
High	MS08_v1_0122	ID:23315853 pepA| putative cytosol aminopeptidase [Beijerinckiaceae Ms08]	0	66	26	387	26	538	5.79395e+07	6.23034e+07	3.65697e+07	4.96998e+07	3.82153e+07	4.02941e+07	4.52723e+07	4.20872e+07
High	MS08_v1_0549	ID:23316280 katG| catalase/hydroperoxidase HPI(I) [Beijerinckiaceae Ms08]	0	54	32	559	32	743	6.55435e+07	6.35903e+07	8.37439e+07	8.22205e+07	1.37671e+08	1.36451e+08	1.20975e+08	1.67609e+08
High	MS08_v1_0803	ID:23316534 glyA| serine hydroxymethyltransferase [Beijerinckiaceae Ms08]	0	68	27	681	27	432	2.08645e+08	2.29992e+08	1.78939e+08	2.16508e+08	5.86897e+07	5.74394e+07	7.58652e+07	6.21478e+07
High	MS08_v1_0494	ID:23316225 eno| enolase [Beijerinckiaceae Ms08]	0	74	23	559	23	427	1.62657e+08	1.52867e+08	1.2502e+08	1.522e+08	6.23315e+07	7.51324e+07	8.66513e+07	9.09468e+07
High	MS08_v1_1153	ID:23316884 fadB| Fatty acid oxidation complex subunit alpha [Includes: Enoyl-CoA hydratase/Delta(3)-cis-Delta(2)-trans-enoyl-CoA isomerase/3-hydroxybutyryl-CoA epimerase ; 3-hydroxyacyl-CoA dehydrogenase] [Beijerinckiaceae Ms08]	0	66	36	373	36	716	4.62433e+07	4.22794e+07	2.14559e+07	3.73056e+07	2.06785e+07	2.31907e+07	2.89426e+07	2.13537e+07
High	MS08_v1_1978	ID:23317709 pntAA| NAD(P) transhydrogenase subunit alpha part 1 [Beijerinckiaceae Ms08]	0	94	27	538	27	379	2.25714e+08	2.39595e+08	1.91339e+08	2.24362e+08	4.04063e+07	4.22534e+07	3.94004e+07	3.88514e+07
High	MS08_v1_0150	ID:23315881 ahcY| Adenosylhomocysteinase [Beijerinckiaceae Ms08]	0	70	27	467	27	468	1.5054e+08	1.29194e+08	1.07801e+08	1.12964e+08	7.26616e+06	8.98952e+06	1.13101e+07	5.24779e+06
High	MS08_v1_1336	ID:23317067 conserved exported protein of unknown function [Beijerinckiaceae Ms08]	0	61	44	679	42	840	2.87996e+07	3.47254e+07	1.06021e+08	8.75899e+07	1.17109e+08	1.01912e+08	9.68434e+07	9.67355e+07
High	MS08_v1_1846	ID:23317577 fhs| Formate--tetrahydrofolate ligase [Beijerinckiaceae Ms08]	0	57	31	641	31	558	2.00832e+08	2.20616e+08	1.83264e+08	1.99634e+08	6.43083e+07	6.60155e+07	5.96092e+07	7.22925e+07
High	MS08_v1_0099	ID:23315830 clpA| ATPase and specificity subunit of ClpA-ClpP ATP-dependent serine protease, chaperone activity [Beijerinckiaceae Ms08]	0	52	40	365	40	835	3.71236e+07	3.65071e+07	1.96248e+07	2.95301e+07	8.28722e+06	9.12073e+06	1.29619e+07	8.00015e+06
High	MS08_v1_1492	ID:23317223 topA| DNA topoisomerase 1 [Beijerinckiaceae Ms08]	0	57	51	404	51	951	2.45563e+07	2.77325e+07	1.85733e+07	2.70246e+07	1.33401e+07	1.36965e+07	1.44502e+07	1.4814e+07
High	MS08_v1_0548	ID:23316279 ppc| Phosphoenolpyruvate carboxylase [Beijerinckiaceae Ms08]	0	61	47	347	47	923	2.2836e+07	2.2028e+07	1.07532e+07	2.34366e+07	1.63381e+07	1.58692e+07	1.48925e+07	1.46458e+07
High	MS08_v1_2805	ID:23318536 FHA domain containing protein [Beijerinckiaceae Ms08]	0	72	38	434	38	620	7.06432e+07	6.51455e+07	8.31364e+07	9.92101e+07	1.34884e+07	1.35417e+07	1.73201e+07	1.91803e+07
High	MS08_v1_0025	ID:23315756 smc| Chromosome partition protein Smc [Beijerinckiaceae Ms08]	0	50	49	275	49	1150	2.86799e+07	2.58721e+07	8.18205e+06	2.81712e+07	2.65438e+06	2.96384e+06	3.7146e+06	2.61817e+06
High	MS08_v1_1840	ID:23317571 ppc| Phosphoenolpyruvate carboxylase [Beijerinckiaceae Ms08]	0	54	43	406	43	921	5.0458e+07	4.25528e+07	2.61468e+07	3.3374e+07	1.86199e+07	1.53474e+07	1.43629e+07	1.62433e+07
High	MS08_v1_1045	ID:23316776 alaS| alanyl-tRNA synthetase [Beijerinckiaceae Ms08]	0	52	40	423	40	903	3.01793e+07	2.87267e+07	1.19352e+07	2.29295e+07	1.87364e+07	1.87473e+07	1.4672e+07	1.8943e+07
High	MS08_v1_2193	ID:23317924 infB| translation initiation factor IF-2 [Beijerinckiaceae Ms08]	0	51	36	428	36	879	5.23193e+07	5.57669e+07	3.69267e+07	5.6385e+07	2.68094e+07	3.21439e+07	3.58826e+07	3.53799e+07
High	MS08_v1_1839	ID:23317570 mcl| Malyl-CoA lyase [Beijerinckiaceae Ms08]	0	79	22	464	22	325	1.51613e+08	1.27828e+08	1.35341e+08	1.20746e+08	4.89348e+07	6.3059e+07	6.17178e+07	6.07158e+07
High	MS08_v1_1576	ID:23317307 rkpK| UDP-glucose 6-dehydrogenase [Beijerinckiaceae Ms08]	0	65	26	356	26	445	1.04108e+08	1.07977e+08	9.50326e+07	1.08832e+08	1.80965e+06	2.914e+06	4.70083e+06	1.19047e+06
High	MS08_v1_0595	ID:23316326 tig| Trigger factor [Beijerinckiaceae Ms08]	0	68	32	609	32	460	1.60008e+08	1.55789e+08	1.0704e+08	1.55052e+08	6.26889e+07	7.28758e+07	9.21282e+07	7.44221e+07
High	MS08_v1_1909	ID:23317640 Elongation factor G-like protein [Beijerinckiaceae Ms08]	0	63	38	700	38	652	2.48495e+07	2.27202e+07	2.99985e+07	3.76626e+07	2.01395e+08	2.1685e+08	1.92619e+08	2.53198e+08
High	MS08_v1_2783	ID:23318514 nqo| NADH-quinone oxidoreductase chain 3 [Beijerinckiaceae Ms08]	0	60	32	380	32	695	3.90119e+07	4.392e+07	2.60215e+07	4.27715e+07	1.35653e+07	1.56794e+07	1.54368e+07	1.30557e+07
High	MS08_v1_0605	ID:23316336 gyrA| DNA gyrase subunit A [Beijerinckiaceae Ms08]	0	47	39	402	39	922	2.95318e+07	2.95658e+07	1.33907e+07	2.50929e+07	1.41269e+07	1.31073e+07	1.38462e+07	1.44474e+07
High	MS08_v1_1777	ID:23317508 Monooxygenase FAD-binding protein [Beijerinckiaceae Ms08]	0	70	28	368	28	526	5.31561e+07	5.19877e+07	4.33101e+07	5.52655e+07	5.44691e+06	5.79375e+06	9.68238e+06	4.98564e+06
High	MS08_v1_2195	ID:23317926 nusA| transcription termination/antitermination L factor [Beijerinckiaceae Ms08]	0	70	32	469	32	531	6.28236e+07	6.07473e+07	3.9151e+07	6.04391e+07	5.35878e+07	6.29877e+07	5.10595e+07	7.07996e+07
High	MS08_v1_2853	ID:23318584 aceA| isocitrate lyase [Beijerinckiaceae Ms08]	0	62	28	408	28	543	1.42615e+08	1.54369e+08	5.53708e+07	9.21439e+07	7.96339e+06	1.3175e+07	6.9454e+06	9.97685e+06
High	MS08_v1_3323	ID:23319054 mrcA| Penicillin-binding protein 1A [Includes: Penicillin-insensitive transglycosylase ; Penicillin-sensitive transpeptidase] [Beijerinckiaceae Ms08]	0	50	33	242	33	806	3.4386e+07	3.56681e+07	1.83902e+07	3.01352e+07	1.01513e+06	1.06948e+06	2.15919e+06	459807
High	MS08_v1_2020	ID:23317751 rho| transcription termination factor [Beijerinckiaceae Ms08]	0	66	28	412	28	422	5.85086e+07	6.05574e+07	3.5449e+07	5.73137e+07	2.10829e+07	2.21725e+07	3.03114e+07	2.29558e+07
High	MS08_v1_3359	ID:23319090 folD| bifunctional 5,10-methylene-tetrahydrofolate dehydrogenase and 5,10-methylene-tetrahydrofolate cyclohydrolase [Beijerinckiaceae Ms08]	0	75	19	386	19	326	1.44677e+08	1.53417e+08	1.02569e+08	1.37312e+08	1.65112e+07	1.9893e+07	1.91304e+07	1.9314e+07
High	MS08_v1_2151	ID:23317882 cbbT| Transketolase [Beijerinckiaceae Ms08]	0	60	32	546	32	667	5.17435e+07	5.78591e+07	3.83944e+07	4.93635e+07	9.76658e+07	1.03719e+08	1.08763e+08	1.13867e+08
High	MS08_v1_2176	ID:23317907 pheT| Phenylalanine--tRNA ligase beta subunit [Beijerinckiaceae Ms08]	0	47	32	350	32	810	4.00051e+07	4.2068e+07	2.30039e+07	3.52495e+07	1.04297e+07	1.0385e+07	8.84391e+06	1.00398e+07
High	MS08_v1_0416	ID:23316147 guaB| IMP dehydrogenase [Beijerinckiaceae Ms08]	0	68	28	498	28	496	5.53993e+07	5.34376e+07	2.69584e+07	3.97541e+07	7.38642e+07	8.84953e+07	1.07756e+08	9.2823e+07
High	MS08_v1_2574	ID:23318305 TonB-dependent siderophore receptor [Beijerinckiaceae Ms08]	0	45	24	260	24	722	3.83136e+07	3.94072e+07	4.62184e+06	1.13696e+07	3.02362e+06	3.88398e+06	1.24921e+07	3.6819e+06
High	MS08_v1_0235	ID:23315966 3-hydroxyacyl-CoA dehydrogenase NAD-binding [Beijerinckiaceae Ms08]	0	51	31	553	31	736	4.28057e+07	4.28181e+07	3.13503e+07	4.31943e+07	9.32585e+07	1.03756e+08	1.25405e+08	1.03498e+08
High	MS08_v1_2278	ID:23318009 cusA| copper/silver efflux system, membrane component [Beijerinckiaceae Ms08]	0	43	34	220	34	1058	2.6764e+07	2.31799e+07	8.38974e+06	1.63774e+07	5.31119e+06	4.90892e+06	5.85701e+06	3.58599e+06
High	MS08_v1_0086	ID:23315817 carB| carbamoyl-phosphate synthase, large subunit [Beijerinckiaceae Ms08]	0	46	44	351	44	1107	2.94196e+07	3.00066e+07	1.73199e+07	3.18365e+07	1.00964e+07	8.97322e+06	9.38505e+06	8.0509e+06
High	MS08_v1_3436	ID:23319167 glnA| glutamine synthetase [Beijerinckiaceae Ms08]	0	46	22	745	22	469	3.24427e+08	3.34934e+08	3.38791e+08	3.89519e+08	3.60376e+07	7.63294e+07	2.26967e+07	4.54325e+07
High	MS08_v1_3327	ID:23319058 rne| Ribonuclease E [Beijerinckiaceae Ms08]	0	37	31	323	31	990	4.54916e+07	4.82012e+07	2.92665e+07	4.74231e+07	1.20177e+07	1.22837e+07	1.60312e+07	8.67285e+06
High	MS08_v1_2360	ID:23318091 nrtA| Nitrate transport protein NrtA [Beijerinckiaceae Ms08]	0	64	23	333	23	439	1.94416e+08	1.91078e+08	1.01307e+08	1.39882e+08	2.4518e+06	4.86583e+06	3.78674e+06	2.27648e+06
High	MS08_v1_2591	ID:23318322 Peroxiredoxin-like protein DDB_G0282517, mitochondrial [Beijerinckiaceae Ms08]	0	89	20	640	20	211	3.48329e+08	3.69581e+08	2.45367e+08	3.35333e+08	1.25441e+08	1.64431e+08	1.94747e+08	1.61834e+08
High	MS08_v1_1366	ID:23317097 ctpA| Carboxy-terminal-processing protease [Beijerinckiaceae Ms08]	0	67	25	459	25	457	1.94092e+08	1.74784e+08	4.28035e+08	1.30175e+08	8.53594e+07	8.52108e+07	1.29454e+08	1.19949e+08
High	MS08_v1_0109	ID:23315840 icd| Isocitrate dehydrogenase [NADP] [Beijerinckiaceae Ms08]	0	69	25	276	25	405	3.82006e+07	3.55503e+07	2.58946e+07	3.26064e+07	1.48779e+07	1.83511e+07	1.57744e+07	1.92804e+07
High	MS08_v1_2447	ID:23318178 Hopanoid biosynthesis associated RND transporter like protein HpnN [Beijerinckiaceae Ms08]	0	44	29	268	29	888	4.12272e+07	3.71698e+07	2.60605e+07	3.42705e+07	383913	373943	363853	3.95187e+06
High	MS08_v1_1332	ID:23317063 Peroxidase [Beijerinckiaceae Ms08]	0	59	31	435	31	535	3.79533e+07	3.58743e+07	3.54067e+07	4.35567e+07	6.83166e+07	6.05899e+07	6.98568e+07	7.77218e+07
High	MS08_v1_1630	ID:23317361 coxL| Carbon monoxide dehydrogenase large chain [Beijerinckiaceae Ms08]	0	50	32	400	32	806	619395	723386	1.77362e+06	401017	1.89674e+08	2.26673e+08	2.63804e+08	2.37226e+08
High	MS08_v1_1871	ID:23317602 leuS| Leucine--tRNA ligase [Beijerinckiaceae Ms08]	0	51	40	378	40	896	3.14989e+07	2.9802e+07	6.51353e+07	2.96147e+07	3.04314e+07	3.06552e+07	3.07328e+07	4.02474e+07
High	MS08_v1_1337	ID:23317068 conserved protein of unknown function [Beijerinckiaceae Ms08]	0	67	25	573	25	391	7.74911e+07	8.77855e+07	7.53133e+07	1.15481e+08	1.00582e+08	8.96957e+07	1.09834e+08	1.02341e+08
High	MS08_v1_3267	ID:23318998 valS| Valine--tRNA ligase [Beijerinckiaceae Ms08]	0	45	39	283	39	946	2.48754e+07	2.42102e+07	1.4347e+07	2.11739e+07	4.25431e+06	5.39694e+06	4.74078e+06	3.94334e+06
High	MS08_v1_1984	ID:23317715 TonB-dependent receptor [Beijerinckiaceae Ms08]	0	49	24	385	24	801	2.60007e+07	1.85977e+07	6.31256e+06	4.19965e+07	1.3552e+07	2.01214e+07	5.83969e+07	2.49818e+07
High	MS08_v1_1599	ID:23317330 moxJ| Protein MoxJ [Beijerinckiaceae Ms08]	0	67	19	601	19	331	1.75275e+08	1.72858e+08	9.97331e+07	1.45289e+08	3.24318e+07	4.10469e+07	6.50929e+07	4.70158e+07
High	MS08_v1_0784	ID:23316515 tolB| Protein TolB [Beijerinckiaceae Ms08]	0	67	24	370	24	456	3.71525e+07	3.26635e+07	1.98046e+07	3.53552e+07	3.30926e+07	3.23579e+07	3.59204e+07	2.617e+07
High	MS08_v1_2917	ID:23318648 ftsZ| Cell division protein FtsZ 1 [Beijerinckiaceae Ms08]	0	66	23	172	23	577	3.37478e+07	3.10045e+07	9.70318e+06	3.21826e+07	507929	224754		175669
High	MS08_v1_1845	ID:23317576 hprA| Glycerate dehydrogenase [Beijerinckiaceae Ms08]	0	74	19	426	19	338	1.99294e+08	1.79238e+08	1.24738e+08	1.51181e+08	4.36912e+07	5.61684e+07	4.68218e+07	5.22826e+07
High	MS08_v1_3133	ID:23318864 HemY domain protein [Beijerinckiaceae Ms08]	0	58	22	447	22	514	6.51419e+07	6.99092e+07	4.33914e+07	6.4879e+07	6.7411e+07	4.57398e+07	5.60861e+07	5.07579e+07
High	MS08_v1_0273	ID:23316004 exported protein of unknown function [Beijerinckiaceae Ms08]	0	79	16	703	16	200	8.73004e+08	8.80852e+08	5.64865e+08	7.75982e+08	3.92485e+07	6.16202e+07	3.69484e+07	4.26085e+07
High	MS08_v1_1057	ID:23316788 ilvC| acetohydroxy acid isomeroreductase and 2-dehydropantoate 2-reductase [Beijerinckiaceae Ms08]	0	60	20	584	20	339	1.71699e+08	1.57919e+08	1.13484e+08	1.6876e+08	9.20962e+07	1.15283e+08	1.91594e+08	1.29775e+08
High	MS08_v1_2582	ID:23318313 iucD| L-lysine N6-monooxygenase [Beijerinckiaceae Ms08]	0	60	22	249	22	440	1.4596e+08	1.2402e+08	1.23777e+06	1.05173e+07	879690	2.41168e+06	853390	1.12002e+06
High	MS08_v1_2230	ID:23317961 Aminodeoxychorismate lyase [Beijerinckiaceae Ms08]	0	51	22	252	22	609	4.74322e+07	3.39653e+07	2.36396e+07	3.97965e+07	6.06588e+06	5.23146e+06	4.26182e+06	3.88436e+06
High	MS08_v1_0300	ID:23316031 Cytochrome c peroxidase [Beijerinckiaceae Ms08]	0	56	21	421	21	449	4.25532e+07	4.88165e+07	1.04505e+08	1.37825e+08	9.62805e+07	9.62236e+07	5.57056e+07	9.96279e+07
High	MS08_v1_2873	ID:23318604 Uncharacterized transporter HI_0895 [Beijerinckiaceae Ms08]	0	35	28	209	28	1039	3.73553e+07	3.09345e+07	2.83263e+06	1.06368e+07	547304	900257	1.87972e+06	464163
High	MS08_v1_0707	ID:23316438 gyrB| DNA gyrase, subunit B [Beijerinckiaceae Ms08]	0	58	40	305	40	819	2.54524e+07	2.58649e+07	9.87189e+06	2.48181e+07	1.07059e+07	1.08744e+07	1.07885e+07	8.69069e+06
High	MS08_v1_2324	ID:23318055 Formate dehydrogenase, alpha subunit [Beijerinckiaceae Ms08]	0	39	32	307	32	948	2.36199e+07	2.69244e+07	1.26805e+07	3.10598e+07	1.84038e+07	1.40958e+07	1.80336e+07	1.57621e+07
High	MS08_v1_1171	ID:23316902 conserved exported protein of unknown function [Beijerinckiaceae Ms08]	0	62	44	456	42	836	8.8525e+06	9.67033e+06	3.51303e+07	3.66941e+07	6.88281e+07	5.91654e+07	5.66824e+07	5.77747e+07
High	MS08_v1_1842	ID:23317573 sucC| succinyl-CoA synthetase, beta subunit [Beijerinckiaceae Ms08]	0	58	20	393	20	396	1.97734e+08	1.70838e+08	1.55145e+08	1.56005e+08	5.58818e+07	6.4888e+07	5.07837e+07	6.80046e+07
High	MS08_v1_2065	ID:23317796 PpiC-type peptidyl-prolyl cis-trans isomerase [Beijerinckiaceae Ms08]	0	56	23	895	23	354	3.99525e+08	4.6901e+08	2.9808e+08	3.80382e+08	3.0562e+08	3.49998e+08	2.78919e+08	3.72172e+08
High	MS08_v1_0082	ID:23315813 aldB| aldehyde dehydrogenase B [Beijerinckiaceae Ms08]	0	58	19	373	19	506	4.79774e+07	4.86378e+07	5.19468e+07	5.95545e+07	2.43789e+08	2.74347e+08	2.55232e+08	3.05167e+08
High	MS08_v1_2197	ID:23317928 Thioredoxin [Beijerinckiaceae Ms08]	0	89	22	339	22	319	4.03291e+07	4.17538e+07	2.92172e+07	4.95927e+07	4.42038e+07	5.18816e+07	5.90666e+07	5.50572e+07
High	MS08_v1_1455	ID:23317186 Tetratricopeptide TPR_2 repeat protein [Beijerinckiaceae Ms08]	0	47	22	268	22	600	5.06118e+07	4.67932e+07	1.83966e+07	3.60601e+07	3.79636e+06	4.84959e+06	5.04614e+06	2.15362e+06
High	MS08_v1_2918	ID:23318649 xoxF| putative dehydrogenase XoxF [Beijerinckiaceae Ms08]	0	46	23	388	23	599	1.24002e+08	1.25768e+08	2.0058e+08	9.69692e+07	5.72598e+07	4.9341e+07	5.97316e+07	5.06615e+07
High	MS08_v1_2592	ID:23318323 cysD| O-acetylhomoserine (thiol)-lyase [Beijerinckiaceae Ms08]	0	68	19	327	19	437	7.96522e+07	7.25205e+07	4.70369e+07	5.93198e+07	3.21623e+07	4.05229e+07	3.12809e+07	4.59499e+07
High	MS08_v1_1596	ID:23317327 moxR| Protein MoxR [Beijerinckiaceae Ms08]	0	70	25	512	25	342	9.35823e+07	9.80545e+07	6.21863e+07	9.30873e+07	6.43639e+07	6.37642e+07	6.41417e+07	7.05381e+07
High	MS08_v1_3119	ID:23318850 purA| Adenylosuccinate synthetase [Beijerinckiaceae Ms08]	0	74	29	322	29	431	3.9411e+07	3.76038e+07	2.35586e+07	3.40804e+07	1.39584e+07	1.47336e+07	1.7512e+07	1.48802e+07
High	MS08_v1_2076	ID:23317807 Oligoendopeptidase F [Beijerinckiaceae Ms08]	0	47	28	429	28	621	5.27898e+07	5.26432e+07	3.31389e+07	3.72723e+07	5.79179e+07	5.08324e+07	3.9033e+07	5.58893e+07
High	MS08_v1_1097	ID:23316828 metH| homocysteine-N5-methyltetrahydrofolate transmethylase, B12-dependent [Beijerinckiaceae Ms08]	0	40	41	211	41	1247	1.17293e+07	1.26523e+07	5.0739e+06	1.1365e+07	2.33819e+06	2.6795e+06	2.96203e+06	1.37322e+06
High	MS08_v1_1074	ID:23316805 ileS| Isoleucine--tRNA ligase [Beijerinckiaceae Ms08]	0	53	44	210	44	1080	1.63349e+07	1.56366e+07	1.40056e+07	1.58273e+07	4.911e+06	6.68573e+06	7.32359e+06	6.8183e+06
High	MS08_v1_0919	ID:23316650 degP| putative periplasmic serine endoprotease DegP-like [Beijerinckiaceae Ms08]	0	48	23	373	23	512	4.98629e+07	4.69919e+07	2.16105e+07	2.9799e+07	2.49124e+07	2.28308e+07	7.72966e+08	2.39114e+07
High	MS08_v1_0528	ID:23316259 Predicted protein [Beijerinckiaceae Ms08]	0	59	26	497	26	469	2.36889e+07	2.19267e+07	3.14233e+07	3.16697e+07	1.63862e+08	1.9173e+08	1.81391e+08	1.75886e+08
High	MS08_v1_0646	ID:23316377 htrA| putative periplasmic serine endoprotease DegP-like [Beijerinckiaceae Ms08]	0	48	22	376	22	521	1.03841e+08	1.08872e+08	5.20028e+07	8.75425e+07	4.54947e+07	5.24544e+07	1.01519e+08	5.43635e+07
High	MS08_v1_2883	ID:23318614 talB| transaldolase B [Beijerinckiaceae Ms08]	0	58	19	547	19	318	1.13741e+08	1.1527e+08	6.40503e+07	8.22533e+07	1.2532e+08	1.45853e+08	1.64806e+08	1.40615e+08
High	MS08_v1_1702	ID:23317433 Transcriptional regulator, TetR family [Beijerinckiaceae Ms08]	0	80	23	546	23	257	4.81865e+07	4.52561e+07	4.0675e+07	5.00312e+07	2.82435e+08	2.5421e+08	3.19663e+08	3.23441e+08
High	MS08_v1_0114	ID:23315845 thrS| Threonine--tRNA ligase [Beijerinckiaceae Ms08]	0	55	35	298	35	645	3.69912e+07	3.31054e+07	1.98024e+07	2.47838e+07	8.59703e+06	1.11708e+07	1.03468e+07	8.95358e+06
High	MS08_v1_1021	ID:23316752 Amino acid adenylation domain protein [Beijerinckiaceae Ms08]	0	23	46	209	45	2627	1.38216e+07	1.38695e+07	4.13221e+06	1.004e+07	789260	874604	775902	1.49079e+06
High	MS08_v1_0004	ID:23315735 ppdK| Pyruvate, phosphate dikinase [Beijerinckiaceae Ms08]	0	51	40	316	40	892	1.80008e+07	1.94045e+07	1.10642e+07	1.62001e+07	2.40815e+07	2.44469e+07	2.40023e+07	2.32552e+07
High	MS08_v1_0488	ID:23316219 acrB| multidrug efflux system protein [Beijerinckiaceae Ms08]	0	39	32	259	32	1052	3.40158e+07	3.26725e+07	1.31253e+07	2.17077e+07	9.22798e+06	8.05772e+06	1.27401e+07	6.22351e+06
High	MS08_v1_2857	ID:23318588 nemA| N-ethylmaleimide reductase [Beijerinckiaceae Ms08]	0	66	18	304	18	371	9.74575e+07	7.66976e+07	1.28925e+07	3.28621e+07	2.93743e+07	3.61406e+07	7.1595e+07	3.87236e+07
High	MS08_v1_2836	ID:23318567 sucA| 2-oxoglutarate decarboxylase, thiamin-requiring [Beijerinckiaceae Ms08]	0	40	35	340	35	1002	1.62074e+07	1.51143e+07	7.60995e+06	1.38724e+07	1.73658e+07	1.60502e+07	2.91357e+07	1.78388e+07
High	MS08_v1_0668	ID:23316399 actP| Copper-transporting P-type ATPase [Beijerinckiaceae Ms08]	0	44	30	205	30	867	2.53583e+07	2.5011e+07	8.29735e+06	1.48448e+07	4.07106e+06	4.57584e+06	6.07642e+06	4.0371e+06
High	MS08_v1_1247	ID:23316978 rpoD| RNA polymerase, sigma 70 (sigma D) factor [Beijerinckiaceae Ms08]	0	54	35	384	35	684	2.8286e+07	3.12591e+07	2.05264e+07	3.61919e+07	3.67493e+07	3.05563e+07	6.32156e+07	4.93e+07
High	MS08_v1_0765	ID:23316496 sdhA| succinate dehydrogenase, flavoprotein subunit [Beijerinckiaceae Ms08]	0	54	27	349	27	621	2.80637e+07	2.87505e+07	2.6189e+07	3.69355e+07	1.90349e+07	2.37371e+07	2.62362e+07	2.29135e+07
High	MS08_v1_2925	ID:23318656 hemH| Ferrochelatase [Beijerinckiaceae Ms08]	0	68	22	504	22	353	1.1138e+08	1.1239e+08	7.72827e+07	1.12151e+08	6.32766e+07	7.37414e+07	7.40581e+07	7.43712e+07
High	MS08_v1_0487	ID:23316218 acrA| multidrug efflux system [Beijerinckiaceae Ms08]	0	64	25	324	25	396	6.52994e+07	4.56302e+07	3.75144e+07	5.1815e+07	1.36954e+07	1.46169e+07	2.09717e+07	1.60009e+07
High	MS08_v1_1080	ID:23316811 secD| Protein translocase subunit SecD [Beijerinckiaceae Ms08]	0	49	25	383	25	531	5.92627e+07	6.07493e+07	2.80116e+07	4.9853e+07	3.22866e+07	2.70796e+07	3.28912e+07	2.8407e+07
High	MS08_v1_3258	ID:23318989 rpsB| 30S ribosomal protein S2 [Beijerinckiaceae Ms08]	0	69	22	488	22	340	1.32742e+08	1.46081e+08	8.88575e+07	1.31595e+08	5.97856e+07	6.80682e+07	5.82089e+07	6.52382e+07
High	MS08_v1_1125	ID:23316856 Phosphoglucomutase/phosphomannomutase alpha/beta/alpha domain II [Beijerinckiaceae Ms08]	0	58	29	326	29	527	5.94248e+07	6.23855e+07	3.74039e+07	5.89229e+07	1.63203e+07	2.41513e+07	2.47286e+07	2.12161e+07
High	MS08_v1_1099	ID:23316830 leuB| 3-isopropylmalate dehydrogenase 2 [Beijerinckiaceae Ms08]	0	70	20	240	20	369	4.83498e+07	4.27386e+07	2.92609e+07	4.16214e+07	2.5748e+07	2.89636e+07	3.09332e+07	2.92391e+07
High	MS08_v1_2672	ID:23318403 nodQ| Bifunctional enzyme NodQ [Includes: Sulfate adenylyltransferase subunit 1 ; Adenylyl-sulfate kinase] [Beijerinckiaceae Ms08]	0	59	29	203	29	640	1.88443e+07	1.99146e+07	1.37106e+07	1.62403e+07	89455.3	253222	315139	176610
High	MS08_v1_0175	ID:23315906 mch| Methenyltetrahydromethanopterin cyclohydrolase [Beijerinckiaceae Ms08]	0	71	18	400	18	322	9.7373e+07	9.18104e+07	6.77514e+07	8.86374e+07	3.44914e+07	4.51357e+07	4.80906e+07	4.78898e+07
High	MS08_v1_3120	ID:23318851 conserved protein of unknown function [Beijerinckiaceae Ms08]	0	54	24	401	24	561	5.17587e+07	5.1173e+07	2.84078e+07	4.89208e+07	3.04449e+07	2.98721e+07	3.69169e+07	2.9241e+07
High	MS08_v1_0055	ID:23315786 ntrX| Nitrogen assimilation regulatory protein NtrX [Beijerinckiaceae Ms08]	0	61	24	288	24	455	5.3826e+07	5.29024e+07	4.0616e+07	4.81897e+07	9.70261e+06	9.21522e+06	1.07196e+07	9.2639e+06
High	MS08_v1_1988	ID:23317719 rpoA| RNA polymerase, alpha subunit [Beijerinckiaceae Ms08]	0	58	20	477	20	338	1.31272e+08	1.29548e+08	8.00589e+07	1.04418e+08	6.27913e+07	7.49449e+07	7.63657e+07	8.34128e+07
High	MS08_v1_0425	ID:23316156 Peptidase S10 serine carboxypeptidase [Beijerinckiaceae Ms08]	0	50	22	381	22	532	7.47222e+07	6.24581e+07	1.8259e+07	4.31362e+07	4.82821e+07	4.63467e+07	9.26247e+07	5.43018e+07
High	MS08_v1_2016	ID:23317747 conserved exported protein of unknown function [Beijerinckiaceae Ms08]	0	71	14	933	14	190	9.37268e+08	1.44894e+09	1.41863e+09	1.04556e+09	4.21899e+08	4.94066e+08	7.75319e+08	4.78741e+08
High	MS08_v1_0002	ID:23315733 dxs| 1-deoxyxylulose-5-phosphate synthase, thiamine-requiring, FAD-requiring [Beijerinckiaceae Ms08]	0	36	20	165	20	644	1.72966e+07	2.09998e+07	1.1617e+07	2.04114e+07	1.79224e+06	1.15166e+06	1.11213e+06	1.21114e+06
High	MS08_v1_1345	ID:23317076 Type VI secretion protein IcmF [Beijerinckiaceae Ms08]	0	48	42	172	42	1141	6.38926e+06	6.90471e+06	2.18253e+06	6.68317e+06	103207	454355	47105.6
High	MS08_v1_0010	ID:23315741 glmS| L-glutamine:D-fructose-6-phosphate aminotransferase [Beijerinckiaceae Ms08]	0	49	23	332	23	606	2.78552e+07	2.41547e+07	1.11913e+07	2.15807e+07	4.14576e+07	4.24205e+07	5.56246e+07	4.64483e+07
High	MS08_v1_0467	ID:23316198 Catalase-related peroxidase [Beijerinckiaceae Ms08]	0	66	18	526	18	328	5.12788e+07	5.43368e+07	1.04828e+08	1.12719e+08	2.99623e+08	3.40298e+08	4.08099e+08	3.8652e+08
High	MS08_v1_0717	ID:23316448 Peptidase M24 [Beijerinckiaceae Ms08]	0	60	27	317	27	606	2.16047e+07	1.7915e+07	2.48557e+07	1.9559e+07	3.94358e+07	3.92078e+07	3.69806e+07	4.15211e+07
High	MS08_v1_2587	ID:23318318 FAD-dependent pyridine nucleotide-disulfide oxidoreductase [Beijerinckiaceae Ms08]	0	63	26	449	26	508	2.50795e+07	2.57002e+07	3.13508e+07	2.99799e+07	6.83993e+07	7.99637e+07	6.26305e+07	9.12419e+07
High	MS08_v1_3444	ID:23319175 Oligopeptidase B [Beijerinckiaceae Ms08]	0	53	32	180	32	714	9.08482e+06	1.04114e+07	4.55831e+06	1.17067e+07	6.59444e+06	2.49614e+06	1.2783e+06	2.42741e+06
High	MS08_v1_0634	ID:23316365 Cytochrome P450-like protein [Beijerinckiaceae Ms08]	0	61	22	262	22	449	3.28268e+07	3.41163e+07	3.58056e+07	4.43092e+07	4.26277e+07	4.11673e+07	3.42831e+07	4.5649e+07
High	MS08_v1_2328	ID:23318059 parC| DNA topoisomerase 4 subunit A [Beijerinckiaceae Ms08]	0	55	35	234	35	748	1.37799e+07	1.5277e+07	6.48641e+06	1.39891e+07	1.7235e+06	1.85946e+06	2.78455e+06	3.33857e+06
High	MS08_v1_0311	ID:23316042 Glucose-methanol-choline oxidoreductase [Beijerinckiaceae Ms08]	0	59	23	308	23	542	3.20678e+06	2.37543e+06	8.84891e+06	2.06127e+06	1.36456e+08	2.1342e+08	1.7444e+08	2.50591e+08
High	MS08_v1_3453	ID:23319184 yjgR| putative ATPase [Beijerinckiaceae Ms08]	0	62	23	347	23	507	1.99943e+07	1.81435e+07	1.54798e+07	2.06475e+07	5.67324e+07	5.79204e+07	6.14791e+07	6.79638e+07
High	MS08_v1_1490	ID:23317221 dps| Fe-binding and storage protein [Beijerinckiaceae Ms08]	0	88	11	399	11	162	1.42225e+08	1.20833e+08	8.60411e+07	9.46686e+07	1.88699e+08	2.05501e+08	3.78848e+08	2.45616e+08
High	MS08_v1_0814	ID:23316545 xanB| Xanthan biosynthesis protein XanB [Includes: Mannose-6-phosphate isomerase ; Mannose-1-phosphate guanylyl transferase] [Beijerinckiaceae Ms08]	0	56	24	194	24	480	4.5498e+07	4.0426e+07	3.11275e+07	3.9698e+07	5.49216e+06	3.91237e+06	4.95721e+06	5.29021e+06
High	MS08_v1_1409	ID:23317140 argG| Argininosuccinate synthase [Beijerinckiaceae Ms08]	0	58	19	240	19	412	3.17305e+07	3.21475e+07	2.05525e+07	2.83589e+07	1.52323e+07	1.52724e+07	2.0585e+07	1.40042e+07
High	MS08_v1_2864	ID:23318595 glgP| glycogen phosphorylase [Beijerinckiaceae Ms08]	0	50	32	153	32	835	1.10966e+07	9.50519e+06	8.33245e+06	7.86601e+06	2.45736e+06	1.42284e+06	3.45637e+06	5.58568e+06
High	MS08_v1_0009	ID:23315740 glmU| Bifunctional protein GlmU [Includes: UDP-N-acetylglucosamine pyrophosphorylase ; Glucosamine-1-phosphate N-acetyltransferase] [Beijerinckiaceae Ms08]	0	75	21	211	21	451	2.25986e+07	1.78968e+07	1.13797e+07	1.96272e+07	7.59825e+06	9.56934e+06	9.54488e+06	9.54325e+06
High	MS08_v1_3023	ID:23318754 putative PAS/PAC sensor hybrid histidine kinase [Beijerinckiaceae Ms08]	0	49	35	303	35	986	7.75247e+06	5.99926e+06	1.04947e+06	4.90708e+06	3.25296e+07	3.50688e+07	4.78913e+07	4.14025e+07
High	MS08_v1_1291	ID:23317022 fadD| Long-chain-fatty-acid--CoA ligase [Beijerinckiaceae Ms08]	0	55	26	271	26	573	3.8752e+07	3.70214e+07	2.15954e+07	3.83175e+07	1.67187e+07	1.81989e+07	2.929e+07	1.77673e+07
High	MS08_v1_1442	ID:23317173 glyS| Glycine--tRNA ligase beta subunit [Beijerinckiaceae Ms08]	0	44	32	262	32	709	2.34337e+07	2.29722e+07	7.2507e+06	1.81813e+07	7.50675e+06	8.91723e+06	8.01925e+06	8.17268e+06
High	MS08_v1_2041	ID:23317772 hslU| molecular chaperone and ATPase component of HslUV protease [Beijerinckiaceae Ms08]	0	57	25	471	25	435	6.61524e+07	6.15891e+07	1.38915e+08	5.39848e+07	9.43069e+07	9.41616e+07	1.20607e+08	1.20747e+08
High	MS08_v1_0868	ID:23316599 ppsA| Phosphoenolpyruvate synthase [Beijerinckiaceae Ms08]	0	57	39	428	39	803	9.03297e+06	9.00589e+06	7.41458e+06	9.85871e+06	3.79249e+07	4.40903e+07	5.28412e+07	4.47623e+07
High	MS08_v1_2343	ID:23318074 Manganese containing catalase [Beijerinckiaceae Ms08]	0	77	15	420	15	245	404171	511408	311221	755900	5.89878e+08	6.58903e+08	6.74591e+08	7.98086e+08
High	MS08_v1_0847	ID:23316578 gltA| citrate synthase [Beijerinckiaceae Ms08]	0	56	25	337	25	431	8.18127e+07	8.93073e+07	5.46555e+07	9.70873e+07	1.556e+07	2.26044e+07	2.76277e+07	1.68619e+07
High	MS08_v1_3259	ID:23318990 tsf| protein chain elongation factor EF-Ts [Beijerinckiaceae Ms08]	0	79	18	332	18	309	7.4765e+07	7.45173e+07	3.75262e+07	5.92221e+07	2.36256e+07	3.05927e+07	3.46436e+07	2.85888e+07
High	MS08_v1_0805	ID:23316536 ErfK/YbiS/YcfS/YnhG family protein [Beijerinckiaceae Ms08]	0	61	24	192	24	457	3.16164e+07	3.00681e+07	1.85001e+07	2.83173e+07	654059	929441	434839	441383
High	MS08_v1_3132	ID:23318863 conserved protein of unknown function [Beijerinckiaceae Ms08]	0	62	22	541	22	438	1.18956e+08	1.21357e+08	7.5736e+07	1.27575e+08	1.10005e+08	1.19521e+08	1.24072e+08	1.19611e+08
High	MS08_v1_2066	ID:23317797 argJ| Arginine biosynthesis bifunctional protein ArgJ [Includes: Glutamate N-acetyltransferase ; Amino-acid acetyltransferase] [Beijerinckiaceae Ms08]	0	71	27	264	27	412	5.04879e+07	4.84219e+07	6.02103e+07	5.33902e+07	6.52223e+06	9.10904e+06	7.07493e+06	5.53114e+06
High	MS08_v1_2323	ID:23318054 NADH dehydrogenase (Quinone) [Beijerinckiaceae Ms08]	0	54	21	233	21	516	2.53686e+07	2.74446e+07	1.18941e+07	3.0325e+07	6.46002e+06	7.22002e+06	1.04122e+07	6.93845e+06
High	MS08_v1_1017	ID:23316748 pyk| Pyruvate kinase [Beijerinckiaceae Ms08]	0	55	20	237	20	477	2.91867e+07	2.83993e+07	1.9856e+07	2.43833e+07	1.17987e+07	1.14121e+07	9.48459e+06	9.73133e+06
High	MS08_v1_2437	ID:23318168 Lipid A ABC exporter family, fused ATPase and inner membrane subunits [Beijerinckiaceae Ms08]	0	49	26	184	25	608	3.30484e+07	3.07349e+07	9.01049e+06	2.07901e+07	1.57284e+06	1.87093e+06	2.92593e+06	1.11197e+06
High	MS08_v1_2589	ID:23318320 cysK| cysteine synthase A, O-acetylserine sulfhydrolase A subunit [Beijerinckiaceae Ms08]	0	70	14	271	14	331	7.8303e+07	7.64956e+07	5.61796e+07	7.06086e+07	3.42627e+07	5.20236e+07	4.57764e+07	4.81675e+07
High	MS08_v1_0484	ID:23316215 cnrA| Nickel and cobalt resistance protein CnrA [Beijerinckiaceae Ms08]	0	38	39	170	39	1090	1.63763e+07	1.63841e+07	3.90702e+06	1.1504e+07	3.02171e+06	2.01537e+06	4.50525e+06	1.94566e+06
High	MS08_v1_1394	ID:23317125 L-sorbosone dehydrogenase [Beijerinckiaceae Ms08]	0	71	20	314	20	445	5.3639e+06	4.62972e+06	3.59783e+06	7.03638e+06	1.13156e+08	1.4079e+08	2.34176e+08	1.75108e+08
High	MS08_v1_0130	ID:23315861 Diguanylate cyclase/phosphodiesterase [Beijerinckiaceae Ms08]	0	35	30	167	30	1044	1.2443e+07	1.30957e+07	5.44901e+06	1.10226e+07	859468	334165	397199	79541.9
High	MS08_v1_2148	ID:23317879 exported protein of unknown function [Beijerinckiaceae Ms08]	0	80	15	383	15	201	6.83812e+07	6.79638e+07	4.97411e+07	8.07274e+07	2.20903e+08	1.85812e+08	2.09115e+08	1.83738e+08
High	MS08_v1_0156	ID:23315887 fhcD| Formyltransferase/hydrolase complex subunit D [Beijerinckiaceae Ms08]	0	66	15	296	15	302	4.46056e+07	4.46376e+07	2.43705e+07	4.52551e+07	4.28899e+07	3.84883e+07	3.75788e+07	4.06879e+07
High	MS08_v1_0054	ID:23315785 ntrY| Nitrogen regulation protein NtrY [Beijerinckiaceae Ms08]	0	53	32	183	32	757	1.346e+07	1.35315e+07	5.60969e+06	1.23483e+07	6.87861e+06	5.59131e+06	6.08373e+06	6.263e+06
High	MS08_v1_0923	ID:23316654 nrdJ| Vitamin B12-dependent ribonucleotide reductase [Beijerinckiaceae Ms08]	0	35	34	181	34	1226	1.33912e+07	1.49324e+07	8.45828e+06	1.42901e+07	2.18871e+06	2.52927e+06	3.10941e+06	1.49748e+06
High	MS08_v1_1288	ID:23317019 opgD| Glucans biosynthesis protein D 2 [Beijerinckiaceae Ms08]	0	67	27	216	27	524	2.652e+07	2.56422e+07	8.57686e+06	2.45072e+07	1.03056e+07	1.04777e+07	1.58424e+07	1.07295e+07
High	MS08_v1_1275	ID:23317006 conserved exported protein of unknown function [Beijerinckiaceae Ms08]	0	69	14	331	14	273	1.21006e+08	1.02109e+08	8.23492e+07	1.30462e+08	2.87335e+07	3.1899e+07	2.54158e+07	3.89917e+07
High	MS08_v1_3216	ID:23318947 fused putative transporter subunits of ABC superfamily: ATP-binding components (modular protein) [Beijerinckiaceae Ms08]	0	39	23	253	23	701	4.09282e+07	3.74001e+07	2.89276e+07	3.36156e+07	7.36849e+06	7.93811e+06	8.29915e+06	1.07373e+07
High	MS08_v1_0530	ID:23316261 rhlE| ATP-dependent RNA helicase RhlE [Beijerinckiaceae Ms08]	0	63	25	244	25	496	1.89935e+07	2.04815e+07	6.81201e+06	1.42551e+07	4.49124e+06	3.38947e+06	5.10281e+06	3.94896e+06
High	MS08_v1_0561	ID:23316292 hppA| K(+)-insensitive pyrophosphate-energized proton pump [Beijerinckiaceae Ms08]	0	24	18	368	18	712	9.97085e+07	1.09292e+08	7.17565e+07	1.02208e+08	4.23166e+07	4.40097e+07	5.38123e+07	4.77225e+07
High	MS08_v1_0593	ID:23316324 clpX| ATP-dependent Clp protease ATP-binding subunit [Beijerinckiaceae Ms08]	0	58	23	272	23	421	5.40583e+07	5.71072e+07	2.829e+07	4.42765e+07	9.34806e+06	1.02146e+07	1.09304e+07	1.07599e+07
High	MS08_v1_0713	ID:23316444 htpG| Chaperone protein HtpG [Beijerinckiaceae Ms08]	0	55	29	220	29	644	8.24379e+06	8.45226e+06	3.42005e+06	7.91359e+06	1.9971e+07	2.28722e+07	3.13984e+07	2.7065e+07
High	MS08_v1_3250	ID:23318981 conserved protein of unknown function [Beijerinckiaceae Ms08]	0	67	20	235	20	323	3.90213e+07	4.21442e+07	2.0813e+07	3.45881e+07	3.07908e+06	5.50044e+06	9.13769e+06	3.61878e+06
High	MS08_v1_2207	ID:23317938 pgi| glucosephosphate isomerase [Beijerinckiaceae Ms08]	0	52	23	303	23	548	2.14541e+07	2.12568e+07	9.62714e+06	1.79073e+07	4.58448e+07	4.96168e+07	4.8716e+07	5.80582e+07
High	MS08_v1_2912	ID:23318643 murC| UDP-N-acetylmuramate:L-alanine ligase [Beijerinckiaceae Ms08]	0	59	21	167	21	466	2.48406e+07	2.60509e+07	1.19548e+07	2.53115e+07	376829	525247	391853	120997
High	MS08_v1_1645	ID:23317376 ATPase associated with various cellular activities AAA_3 [Beijerinckiaceae Ms08]	0	67	16	186	16	333	1.7946e+07	1.63465e+07	8.17537e+06	1.35843e+07	8.63948e+06	8.22249e+06	1.34017e+07	9.37706e+06
High	MS08_v1_1721	ID:23317452 opgG| Glucans biosynthesis protein G [Beijerinckiaceae Ms08]	0	49	22	237	22	572	2.88108e+07	2.83805e+07	1.58879e+07	2.56141e+07	1.834e+07	1.44523e+07	1.77233e+07	1.55788e+07
High	MS08_v1_2468	ID:23318199 protein of unknown function [Beijerinckiaceae Ms08]	0	45	16	335	16	452	2.47289e+07	2.97804e+07	4.41173e+07	3.03437e+07	4.05051e+07	4.42398e+07	4.88475e+07	4.5834e+07
High	MS08_v1_0238	ID:23315969 Acyl-CoA dehydrogenase [Beijerinckiaceae Ms08]	0	61	26	225	26	597	2.52365e+07	2.35391e+07	1.91905e+07	2.14313e+07	2.46251e+07	3.00504e+07	3.8731e+07	2.90748e+07
High	MS08_v1_0159	ID:23315890 Tungsten-containing formylmethanofuran dehydrogenase, subunit B [Beijerinckiaceae Ms08]	0	61	20	399	20	370	3.08414e+07	3.21856e+07	2.62995e+07	4.55398e+07	3.87337e+07	3.76661e+07	4.35842e+07	4.09111e+07
High	MS08_v1_1613	ID:23317344 fabB| 3-oxoacyl-[acyl-carrier-protein] synthase I [Beijerinckiaceae Ms08]	0	58	16	241	16	407	2.9255e+07	3.44738e+07	1.88116e+07	2.86791e+07	7.77682e+06	1.04551e+07	1.44826e+07	1.0184e+07
High	MS08_v1_0275	ID:23316006 exported protein of unknown function [Beijerinckiaceae Ms08]	0	78	16	863	16	203	1.09591e+09	1.0661e+09	3.72845e+08	8.61313e+08	4.74708e+08	4.75287e+08	5.0837e+08	4.02437e+08
High	MS08_v1_2150	ID:23317881 epd| D-erythrose 4-phosphate dehydrogenase [Beijerinckiaceae Ms08]	0	66	18	271	18	335	4.82376e+07	4.81703e+07	3.24063e+07	4.03192e+07	2.305e+07	2.74407e+07	2.30714e+07	2.84897e+07
High	MS08_v1_1070	ID:23316801 Uncharacterized zinc protease y4wA [Beijerinckiaceae Ms08]	0	65	22	316	22	456	5.01665e+07	4.23842e+07	2.86846e+07	3.66736e+07	1.5187e+07	1.88138e+07	2.39568e+07	2.1793e+07
High	MS08_v1_0721	ID:23316452 uvrA| ATPase and DNA damage recognition protein of nucleotide excision repair excinuclease UvrABC [Beijerinckiaceae Ms08]	0	46	36	197	36	989	1.03742e+07	9.97104e+06	4.9259e+06	7.28167e+06	7.18381e+06	6.78717e+06	1.2273e+07	6.75196e+06
High	MS08_v1_0779	ID:23316510 Tol-pal system protein YbgF [Beijerinckiaceae Ms08]	0	59	20	212	20	391	3.83608e+07	2.99236e+07	1.81152e+07	2.69234e+07	7.77124e+06	6.97124e+06	8.85426e+06	4.80488e+06
High	MS08_v1_2872	ID:23318603 Efflux transporter, RND family, MFP subunit [Beijerinckiaceae Ms08]	0	59	17	202	17	385	7.40464e+07	6.58679e+07	1.37569e+07	3.01979e+07	3.3526e+06	4.55682e+06	7.12982e+06	4.03925e+06
High	MS08_v1_1271	ID:23317002 polA| DNA polymerase I [Beijerinckiaceae Ms08]	0	51	37	239	37	1009	9.53662e+06	8.87678e+06	4.46628e+06	8.24965e+06	1.75509e+07	1.92163e+07	1.65795e+07	2.03985e+07
High	MS08_v1_0157	ID:23315888 fhcA| Formyltransferase/hydrolase complex Fhc subunit A [Beijerinckiaceae Ms08]	0	59	24	290	24	544	2.21057e+07	2.31455e+07	2.59031e+07	2.8865e+07	2.1894e+07	2.59901e+07	2.73045e+07	2.92106e+07
High	MS08_v1_0308	ID:23316039 conserved membrane protein of unknown function [Beijerinckiaceae Ms08]	0	39	27	294	27	815	8.25074e+06	8.28812e+06	1.18621e+07	1.23623e+07	4.7462e+07	4.11917e+07	3.32868e+07	3.53792e+07
High	MS08_v1_0480	ID:23316211 accC| acetyl-CoA carboxylase, biotin carboxylase subunit [Beijerinckiaceae Ms08]	0	63	21	240	21	453	2.00431e+07	1.95661e+07	1.50296e+07	1.88702e+07	1.02002e+07	1.52206e+07	1.58643e+07	1.10116e+07
High	MS08_v1_3208	ID:23318939 gmd| GDP-D-mannose dehydratase, NAD(P)-binding [Beijerinckiaceae Ms08]	0	69	18	221	18	352	8.2882e+07	8.33906e+07	6.15575e+07	8.01937e+07	7.79369e+06	9.60379e+06	1.10138e+07	8.27525e+06
High	MS08_v1_1026	ID:23316757 3-dehydroquinate synthase [Beijerinckiaceae Ms08]	0	56	28	284	28	613	1.53936e+07	1.49931e+07	1.0723e+07	1.45426e+07	1.72112e+07	1.71995e+07	2.03104e+07	1.75857e+07
High	MS08_v1_1032	ID:23316763 putative abc transporter, substrate-binding protein [Beijerinckiaceae Ms08]	0	37	23	322	23	632	3.04591e+07	2.72846e+07	2.20719e+07	2.04371e+07	4.78132e+07	3.8814e+07	5.91649e+07	3.49766e+07
High	MS08_v1_1643	ID:23317374 conserved protein of unknown function [Beijerinckiaceae Ms08]	0	43	31	202	31	935	8.40973e+06	9.45936e+06	1.74427e+06	8.8416e+06	3.99463e+06	2.76923e+06	9.17489e+06	2.33473e+06
High	MS08_v1_2856	ID:23318587 exoN| UTP--glucose-1-phosphate uridylyltransferase [Beijerinckiaceae Ms08]	0	71	13	137	13	295	3.3489e+07	3.25667e+07	1.39978e+07	2.37467e+07	2.33361e+06	3.41059e+06	3.22617e+06	1.83812e+06
High	MS08_v1_3028	ID:23318759 Thiamine pyrophosphate protein domain protein TPP-binding [Beijerinckiaceae Ms08]	0	61	23	252	23	574	1.10599e+07	1.14501e+07	6.31054e+06	1.36134e+07	1.1542e+07	1.24905e+07	1.91184e+07	1.15435e+07
High	MS08_v1_1837	ID:23317568 Transglutaminase domain protein [Beijerinckiaceae Ms08]	0	42	39	175	39	1126	1.05808e+07	1.05749e+07	7.69924e+06	1.19803e+07	1.03305e+06	1.18872e+06	1.13922e+06	1.41052e+06
High	MS08_v1_0288	ID:23316019 Serine-type D-Ala-D-Ala carboxypeptidase [Beijerinckiaceae Ms08]	0	51	16	257	16	410	3.01489e+07	2.91904e+07	3.59012e+08	3.07088e+07	2.25805e+07	2.6915e+07	1.90328e+07	2.94115e+07
High	MS08_v1_0223	ID:23315954 putative [NiFe] hydrogenase small subunit [Beijerinckiaceae Ms08]	0	54	16	344	16	354	680169	118501	448712	389310	2.76749e+08	3.31518e+08	2.24896e+08	3.3315e+08
High	MS08_v1_1557	ID:23317288 ffh| Signal Recognition Particle (SRP) component with 4.5S RNA (ffs) [Beijerinckiaceae Ms08]	0	54	25	203	25	527	1.35071e+07	1.17139e+07	1.13258e+07	1.09456e+07	3.37063e+06	4.712e+06	3.85746e+06	3.30292e+06
High	MS08_v1_0570	ID:23316301 Exopolysaccharide transport protein family [Beijerinckiaceae Ms08]	0	48	30	166	30	777	1.46006e+07	1.53443e+07	6.13963e+06	1.08286e+07	5.51945e+06	4.87895e+06	4.6923e+06	4.26987e+06
High	MS08_v1_2407	ID:23318138 accA| Acetyl-coenzyme A carboxylase carboxyl transferase subunit alpha [Beijerinckiaceae Ms08]	0	69	18	238	18	317	3.03751e+07	3.031e+07	1.45208e+07	2.66592e+07	1.90255e+07	2.73736e+07	3.12023e+07	2.75553e+07
High	MS08_v1_1992	ID:23317723 Trehalose synthase [Beijerinckiaceae Ms08]	0	35	35	254	35	1090	1.00299e+07	9.05301e+06	5.2098e+06	9.33209e+06	7.54739e+06	7.87322e+06	9.43975e+06	7.67018e+06
High	MS08_v1_2149	ID:23317880 pgk| Phosphoglycerate kinase [Beijerinckiaceae Ms08]	0	67	22	246	22	409	4.48515e+07	4.6174e+07	3.4811e+07	4.3072e+07	1.33143e+07	1.34833e+07	1.57516e+07	1.29815e+07
High	MS08_v1_1400	ID:23317131 protein of unknown function [Beijerinckiaceae Ms08]	0	78	17	198	17	231	6.18981e+07	5.98635e+07	3.70135e+07	5.21932e+07	1.21515e+06	1.68719e+06	1.07488e+06	736658
High	MS08_v1_2833	ID:23318564 mdh| Malate dehydrogenase [Beijerinckiaceae Ms08]	0	74	21	270	21	321	4.42087e+07	4.31817e+07	3.09605e+07	4.08113e+07	1.20755e+07	1.41627e+07	1.80675e+07	1.33052e+07
High	MS08_v1_1471	ID:23317202 rsh| GTP pyrophosphokinase rsh [Beijerinckiaceae Ms08]	0	55	36	218	36	734	8.30644e+06	9.07028e+06	2.59031e+06	8.84697e+06	6.01196e+06	7.18642e+06	5.90559e+06	6.67936e+06
High	MS08_v1_1930	ID:23317661 acs| acetyl-CoA synthetase [Beijerinckiaceae Ms08]	0	42	23	294	23	645	2.01012e+07	1.93077e+07	1.81378e+07	2.29161e+07	2.66143e+07	2.63686e+07	2.91114e+07	2.77638e+07
High	MS08_v1_0248	ID:23315979 ppiA| peptidyl-prolyl cis-trans isomerase A (rotamase A) [Beijerinckiaceae Ms08]	0	73	13	281	13	191	1.13051e+08	1.10798e+08	7.00559e+07	9.28687e+07	4.93335e+07	5.74314e+07	5.26393e+07	4.85121e+07
High	MS08_v1_1069	ID:23316800 Uncharacterized zinc protease-like protein y4wB [Beijerinckiaceae Ms08]	0	59	19	304	19	430	4.26856e+07	4.24649e+07	2.44483e+07	3.96622e+07	1.31716e+07	1.37126e+07	1.98217e+07	1.77262e+07
High	MS08_v1_2303	ID:23318034 purK| N5-carboxyaminoimidazole ribonucleotide synthase [Beijerinckiaceae Ms08]	0	73	18	191	18	372	1.89812e+07	1.66244e+07	8.28802e+06	1.621e+07	4.43619e+06	4.93105e+06	7.31874e+06	5.10901e+06
High	MS08_v1_1517	ID:23317248 Helicase domain protein [Beijerinckiaceae Ms08]	0	22	22	231	22	1102	2.2659e+07	2.161e+07	1.48119e+07	2.62967e+07	7.98317e+06	8.9212e+06	7.59814e+06	9.90188e+06
High	MS08_v1_1029	ID:23316760 Polysaccharide export protein [Beijerinckiaceae Ms08]	0	52	18	231	18	409	2.10689e+07	2.17849e+07	1.47086e+07	2.17932e+07	2.03073e+07	2.15293e+07	2.7338e+07	1.77572e+07
High	MS08_v1_1807	ID:23317538 tcmO| Tetracenomycin polyketide synthesis 8-O-methyl transferase TcmO [Beijerinckiaceae Ms08]	0	61	14	167	14	336	4.97832e+07	5.00906e+07	3.43534e+07	3.7667e+07	4.19119e+06	4.14653e+06	4.13471e+06	3.11005e+06
High	MS08_v1_3350	ID:23319081 phbC| Poly-beta-hydroxybutyrate polymerase [Beijerinckiaceae Ms08]	0	55	30	173	30	669	1.24405e+07	1.10228e+07	5.20258e+06	9.00041e+06	5.91557e+06	4.37019e+06	3.75116e+06	3.38969e+06
High	MS08_v1_3123	ID:23318854 pstS| phosphate transporter subunit ; periplasmic-binding component of ABC superfamily [Beijerinckiaceae Ms08]	0	63	19	314	19	347	4.69046e+07	4.63661e+07	2.62113e+07	3.70791e+07	2.98636e+07	4.31287e+07	8.14957e+07	3.79625e+07
High	MS08_v1_1851	ID:23317582 cfxB| Fructose-bisphosphate aldolase 2 [Beijerinckiaceae Ms08]	0	50	18	243	18	361	4.64342e+07	4.12977e+07	1.96187e+07	3.05812e+07	4.07022e+06	6.18155e+06	6.79829e+06	5.31816e+06
High	MS08_v1_2588	ID:23318319 PfkB domain protein [Beijerinckiaceae Ms08]	0	52	14	181	14	333	2.23008e+07	2.07993e+07	1.86914e+07	2.1547e+07	2.05893e+06	2.58177e+06	2.24265e+06	2.14874e+06
High	MS08_v1_0448	ID:23316179 rplE| 50S ribosomal protein L5 [Beijerinckiaceae Ms08]	0	66	19	338	19	248	1.10717e+08	1.15365e+08	7.73626e+07	1.01438e+08	4.25403e+07	4.91728e+07	3.78395e+07	4.94468e+07
High	MS08_v1_3278	ID:23319009 conserved membrane protein of unknown function [Beijerinckiaceae Ms08]	0	57	29	187	29	695	9.3247e+06	9.21491e+06	2.67349e+06	9.51162e+06	4.96287e+06	4.68095e+06	1.70532e+07	4.53922e+06
High	MS08_v1_2309	ID:23318040 asd| Aspartate-semialdehyde dehydrogenase [Beijerinckiaceae Ms08]	0	71	19	214	19	344	5.33941e+07	2.68412e+07	1.4137e+07	1.89869e+07	6.63004e+06	9.61412e+06	1.0902e+07	8.96907e+06
High	MS08_v1_1103	ID:23316834 putative periplasmic protein [Beijerinckiaceae Ms08]	0	55	14	245	14	292	7.77111e+07	6.79519e+07	5.14536e+07	7.75715e+07	3.63152e+07	4.097e+07	4.07204e+07	4.4733e+07
High	MS08_v1_1581	ID:23317312 FAD-dependent pyridine nucleotide-disulfide oxidoreductase [Beijerinckiaceae Ms08]	0	68	24	248	24	472	1.06416e+07	1.01208e+07	5.08264e+06	9.20805e+06	2.53462e+07	2.24227e+07	2.32573e+07	2.52883e+07
High	MS08_v1_2536	ID:23318267 putative aldo-keto reductase 2 [Beijerinckiaceae Ms08]	0	67	21	348	21	335	2.76011e+07	2.24525e+07	2.04856e+07	2.47289e+07	1.17714e+08	1.33993e+08	1.54482e+08	1.6374e+08
High	MS08_v1_1043	ID:23316774 recA| DNA strand exchange and recombination protein with protease and nuclease activity [Beijerinckiaceae Ms08]	0	69	21	204	21	365	2.57156e+07	2.46336e+07	1.52089e+07	2.44515e+07	1.42363e+07	1.27222e+07	1.37618e+07	1.54363e+07
High	MS08_v1_0432	ID:23316163 serS| Serine--tRNA ligase [Beijerinckiaceae Ms08]	0	63	27	250	27	489	1.42711e+07	1.30241e+07	7.42018e+06	1.24192e+07	8.52278e+06	1.14496e+07	1.12086e+07	1.22678e+07
High	MS08_v1_3029	ID:23318760 conserved protein of unknown function [Beijerinckiaceae Ms08]	0	48	39	132	39	1087	5.90331e+06	5.43208e+06	5.4092e+06	4.86515e+06	5.08462e+06	5.52947e+06	6.07623e+06	5.23013e+06
High	MS08_v1_3401	ID:23319132 conserved protein of unknown function [Beijerinckiaceae Ms08]	0	63	22	295	22	402	2.03223e+07	2.12484e+07	3.32406e+07	3.24191e+07	7.96677e+07	7.62306e+07	5.48761e+07	6.98152e+07
High	MS08_v1_2106	ID:23317837 bipA| GTP-binding protein [Beijerinckiaceae Ms08]	0	55	30	195	30	606	3.14341e+07	3.2959e+07	1.65457e+07	2.64094e+07	5.50712e+06	7.08036e+06	7.60098e+06	6.71354e+06
High	MS08_v1_2906	ID:23318637 murE| UDP-N-acetylmuramoyl-L-alanyl-D-glutamate--2,6-diaminopimelate ligase [Beijerinckiaceae Ms08]	0	67	24	205	24	485	1.17869e+07	1.07578e+07	4.4013e+06	1.20461e+07	3.11249e+06	2.98446e+06	4.71824e+06	3.00354e+06
High	MS08_v1_2260	ID:23317991 gatA| Glutamyl-tRNA(Gln) amidotransferase subunit A [Beijerinckiaceae Ms08]	0	55	19	155	19	503	2.11412e+07	2.02655e+07	1.09272e+07	1.72356e+07	7.8223e+06	9.70707e+06	1.16807e+07	8.84459e+06
High	MS08_v1_2136	ID:23317867 Fad-dependent monooxygenase [Beijerinckiaceae Ms08]	0	49	20	198	20	440	3.62651e+07	3.69583e+07	4.36937e+07	3.7765e+07	1.1024e+07	9.97391e+06	1.53933e+07	2.63877e+07
High	MS08_v1_0030	ID:23315761 Invasion associated locus B family protein [Beijerinckiaceae Ms08]	0	62	17	375	17	264	3.488e+08	3.55981e+08	1.99368e+08	3.64816e+08	7.10427e+07	7.62003e+07	8.52789e+07	6.94366e+07
High	MS08_v1_1990	ID:23317721 Protease Do [Beijerinckiaceae Ms08]	0	51	20	290	20	474	3.52975e+07	3.04868e+07	2.80765e+07	3.11565e+07	5.07158e+07	5.49813e+07	6.15991e+07	6.50676e+07
High	MS08_v1_2469	ID:23318200 conserved protein of unknown function [Beijerinckiaceae Ms08]	0	81	11	213	11	132	2.17174e+08	2.40553e+08	1.94515e+09	1.44253e+08	4.60763e+08	5.19367e+08	6.63474e+08	9.48345e+08
High	MS08_v1_2394	ID:23318125 C-methyltransferase [Beijerinckiaceae Ms08]	0	44	21	208	21	439	2.60876e+07	2.74951e+07	3.15418e+07	3.90747e+07	5.38924e+06	7.20435e+06	4.47228e+06	4.82813e+06
High	MS08_v1_2006	ID:23317737 gltD| Glutamate synthase [NADPH] small chain [Beijerinckiaceae Ms08]	0	57	23	173	23	472	1.42142e+07	1.48325e+07	7.22322e+06	1.6511e+07	1.80337e+06	3.47067e+06	1.57388e+06	1.59527e+06
High	MS08_v1_0776	ID:23316507 Multi-sensor hybrid histidine kinase [Beijerinckiaceae Ms08]	0	38	28	200	28	741	1.3687e+07	1.40145e+07	7.51961e+06	1.44636e+07	1.91807e+06	2.38329e+06	3.13348e+06	1.34828e+06
High	MS08_v1_1015	ID:23316746 dnaN| DNA polymerase III subunit beta [Beijerinckiaceae Ms08]	0	58	20	265	20	372	4.77104e+07	4.34398e+07	5.5453e+07	4.37886e+07	2.77442e+07	3.00824e+07	3.16814e+07	3.76221e+07
High	MS08_v1_0177	ID:23315908 mtdB| NAD(P)-dependent methylenetetrahydromethanopterin dehydrogenase [Beijerinckiaceae Ms08]	0	36	11	339	11	296	1.63233e+08	1.66812e+08	1.15229e+08	1.45742e+08	5.08879e+07	6.50563e+07	6.24509e+07	5.72839e+07
High	MS08_v1_1676	ID:23317407 purB| Adenylosuccinate lyase [Beijerinckiaceae Ms08]	0	58	23	185	23	435	1.30058e+07	1.39989e+07	5.14356e+06	1.28521e+07	6.3655e+06	6.89335e+06	8.42772e+06	7.56725e+06
High	MS08_v1_2874	ID:23318605 prfC| peptide chain release factor RF-3 [Beijerinckiaceae Ms08]	0	53	22	144	22	526	5.51451e+08	4.89835e+08	3.10502e+09	2.07156e+08	6.10652e+08	5.97144e+08	9.74831e+08	1.27407e+09
High	MS08_v1_1841	ID:23317572 sucD| succinyl-CoA synthetase, NAD(P)-binding, alpha subunit [Beijerinckiaceae Ms08]	0	62	13	289	13	294	8.18967e+07	8.68223e+07	6.50398e+07	8.45466e+07	2.05995e+07	2.64193e+07	2.0804e+07	2.49996e+07
High	MS08_v1_1059	ID:23316790 ilvI| acetolactate synthase III, large subunit [Beijerinckiaceae Ms08]	0	44	21	260	21	584	2.06562e+07	1.7929e+07	1.69107e+07	1.73898e+07	2.28147e+07	2.64442e+07	2.89513e+07	2.62757e+07
High	MS08_v1_2397	ID:23318128 conserved protein of unknown function [Beijerinckiaceae Ms08]	0	46	19	160	19	445	2.18763e+07	2.32822e+07	2.20063e+07	2.25075e+07	2.39823e+06	2.6306e+06	1.34791e+06	663175
High	MS08_v1_3282	ID:23319013 lysC| Aspartokinase [Beijerinckiaceae Ms08]	0	64	19	186	19	412	1.98199e+07	1.8643e+07	1.14219e+07	1.56812e+07	1.0757e+07	1.29667e+07	1.3831e+07	1.25899e+07
High	MS08_v1_1263	ID:23316994 serA| D-3-phosphoglycerate dehydrogenase [Beijerinckiaceae Ms08]	0	49	20	171	20	528	3.39058e+07	4.85625e+07	1.78005e+08	3.35526e+07	5.30913e+07	2.44538e+07	4.04197e+07	1.04108e+08
High	MS08_v1_0343	ID:23316074 Protein HflC [Beijerinckiaceae Ms08]	0	61	18	382	18	305	1.0438e+08	1.02864e+08	5.22829e+07	9.0205e+07	1.62789e+08	1.51561e+08	1.25029e+08	1.45944e+08
High	MS08_v1_2353	ID:23318084 Salicylate hydroxylase [Beijerinckiaceae Ms08]	0	58	19	171	19	414	1.04825e+07	9.31543e+06	5.36727e+06	8.50752e+06	7.36784e+06	7.02337e+06	1.14758e+07	7.29288e+06
High	MS08_v1_1331	ID:23317062 membrane protein of unknown function [Beijerinckiaceae Ms08]	0	43	26	263	26	785	1.02596e+07	9.30742e+06	1.35231e+07	1.78202e+07	2.18693e+07	2.01674e+07	2.40528e+07	2.26925e+07
High	MS08_v1_0118	ID:23315849 conserved protein of unknown function [Beijerinckiaceae Ms08]	0	54	16	305	16	318	1.02496e+08	9.52485e+07	4.8095e+07	8.96823e+07	3.46647e+07	4.48704e+07	3.90258e+07	4.50367e+07
High	MS08_v1_3366	ID:23319097 Acriflavin resistance protein [Beijerinckiaceae Ms08]	0	30	25	233	25	1043	7.30834e+06	6.9508e+06	2.67825e+06	6.94893e+06	1.76529e+07	1.48648e+07	1.62476e+07	1.41285e+07
High	MS08_v1_1972	ID:23317703 Lytic murein transglycosylase [Beijerinckiaceae Ms08]	0	65	22	281	22	402	3.00852e+07	2.73228e+07	1.5875e+07	2.66854e+07	2.47202e+07	2.76836e+07	2.94722e+07	2.96551e+07
High	MS08_v1_0325	ID:23316056 Peptidase M20 [Beijerinckiaceae Ms08]	0	52	18	194	18	460	2.99844e+07	2.39758e+07	1.96996e+07	2.40831e+07	1.92188e+07	2.02829e+07	1.27708e+07	1.8983e+07
High	MS08_v1_1982	ID:23317713 yheS| Uncharacterized ABC transporter ATP-binding protein YheS [Beijerinckiaceae Ms08]	0	54	31	131	31	627	5.28548e+07	4.44871e+07	4.93265e+08	2.20153e+07	1.92588e+08	1.34767e+08	1.81342e+08	3.01269e+08
High	MS08_v1_0485	ID:23316216 Efflux transporter, RND family, MFP subunit [Beijerinckiaceae Ms08]	0	48	22	305	22	411	4.56278e+07	4.67965e+07	1.83817e+07	3.56109e+07	2.86943e+07	2.05561e+07	4.32856e+07	2.23679e+07
High	MS08_v1_1976	ID:23317707 pntB| pyridine nucleotide transhydrogenase, beta subunit [Beijerinckiaceae Ms08]	0	30	13	341	13	468	6.84536e+07	7.65098e+07	7.56034e+07	8.14843e+07	4.80311e+07	4.9298e+07	4.33769e+07	4.84967e+07
High	MS08_v1_2388	ID:23318119 NADH dehydrogenase (Ubiquinone) [Beijerinckiaceae Ms08]	0	63	16	231	16	336	4.17839e+07	3.74475e+07	2.45734e+07	3.97894e+07	1.58367e+07	1.38708e+07	1.62293e+07	2.12507e+07
High	MS08_v1_1035	ID:23316766 yejF| putative fused oligopeptide transporter subunits of ABC superfamily: ATP-binding components [Beijerinckiaceae Ms08]	0	67	28	172	28	541	9.99071e+06	1.01744e+07	4.18174e+06	6.98053e+06	5.91701e+06	6.61377e+06	7.87265e+06	6.32347e+06
High	MS08_v1_1335	ID:23317066 conserved protein of unknown function [Beijerinckiaceae Ms08]	0	49	24	199	24	627	1.27923e+07	1.33335e+07	1.62603e+07	1.78483e+07	1.42065e+07	1.24123e+07	1.07798e+07	1.24989e+07
High	MS08_v1_0407	ID:23316138 metZ| O-succinylhomoserine sulfhydrylase [Beijerinckiaceae Ms08]	0	55	17	240	17	408	2.29425e+07	2.46111e+07	2.46526e+07	2.34919e+07	1.38873e+07	1.04019e+07	1.07949e+07	1.24597e+07
High	MS08_v1_0515	ID:23316246 conserved exported protein of unknown function [Beijerinckiaceae Ms08]	0	73	16	361	16	227	3.08739e+07	3.19746e+07	2.66432e+07	2.78152e+07	2.23611e+08	2.87395e+08	3.68725e+08	3.02466e+08
High	MS08_v1_1865	ID:23317596 atpG| ATP synthase gamma chain [Beijerinckiaceae Ms08]	0	62	14	247	14	292	7.37328e+07	7.88271e+07	4.27568e+07	6.3396e+07	1.31498e+07	1.45986e+07	1.37786e+07	1.29787e+07
High	MS08_v1_3440	ID:23319171 cysB| Cysteine synthase [Beijerinckiaceae Ms08]	0	64	16	250	16	343	2.27741e+07	2.3028e+07	1.37428e+07	1.49296e+07	1.50315e+07	1.80191e+07	1.95771e+07	2.18893e+07
High	MS08_v1_2063	ID:23317794 conserved exported protein of unknown function [Beijerinckiaceae Ms08]	0	65	14	891	14	185	1.04336e+08	1.10278e+08	7.92448e+07	1.13397e+08	1.86427e+09	2.04975e+09	2.17006e+09	1.85356e+09
High	MS08_v1_0804	ID:23316535 protein of unknown function [Beijerinckiaceae Ms08]	0	54	20	245	20	474	1.03862e+07	9.78699e+06	5.57776e+06	1.30246e+07	1.71661e+07	1.63957e+07	1.71639e+07	1.93129e+07
High	MS08_v1_1235	ID:23316966 gor| Glutathione reductase [Beijerinckiaceae Ms08]	0	57	23	195	23	473	9.95227e+06	1.03519e+07	6.73555e+06	9.15969e+06	2.01557e+07	1.80248e+07	2.90319e+07	2.23409e+07
High	MS08_v1_0879	ID:23316610 40-residue YVTN family beta-propeller repeat protein [Beijerinckiaceae Ms08]	0	50	18	246	18	490	1.40886e+07	1.23761e+07	1.64859e+07	1.52767e+07	8.74496e+07	1.0394e+08	8.35838e+07	9.62381e+07
High	MS08_v1_0846	ID:23316577 gltX| Glutamate--tRNA ligase 1 [Beijerinckiaceae Ms08]	0	49	22	142	22	473	1.23774e+07	1.13384e+07	7.39132e+06	1.25535e+07	4.93866e+06	5.1418e+06	5.70354e+06	5.85265e+06
High	MS08_v1_2073	ID:23317804 56kDa selenium binding protein (SBP56) [Beijerinckiaceae Ms08]	0	69	27	327	27	438	1.19288e+07	8.88419e+06	2.32371e+07	1.50245e+07	5.57498e+07	7.35031e+07	1.75972e+07	9.15599e+07
High	MS08_v1_0911	ID:23316642 Aerobic C4-dicarboxylate transporter [Beijerinckiaceae Ms08]	0	71	10	281	10	181	9.92428e+07	9.90767e+07	5.49824e+07	8.47299e+07	4.94797e+07	5.44847e+07	5.13438e+07	4.95954e+07
High	MS08_v1_1704	ID:23317435 Import inner membrane translocase subunit Tim44 [Beijerinckiaceae Ms08]	0	70	14	240	14	239	3.19925e+07	2.76074e+07	1.69164e+07	2.61086e+07	2.09276e+07	2.34475e+07	2.68458e+07	2.51117e+07
High	MS08_v1_0653	ID:23316384 tRNA synthetase class II (G H P and S) [Beijerinckiaceae Ms08]	0	63	18	214	18	374	1.24148e+07	1.09759e+07	6.07609e+06	1.25079e+07	9.28504e+06	8.61054e+06	1.02134e+07	1.01697e+07
High	MS08_v1_1262	ID:23316993 serC| Phosphoserine aminotransferase [Beijerinckiaceae Ms08]	0	53	19	214	19	390	5.34114e+07	5.35742e+07	3.82697e+07	4.02505e+07	5.06957e+06	6.06216e+06	4.90386e+06	4.71251e+06
High	MS08_v1_0824	ID:23316555 sufS| selenocysteine lyase, PLP-dependent [Beijerinckiaceae Ms08]	0	55	15	154	15	414	1.82675e+07	1.77131e+07	8.08372e+06	1.20586e+07	4.86277e+06	8.47603e+06	8.15235e+06	9.02942e+06
High	MS08_v1_2258	ID:23317989 gatB| Aspartyl/glutamyl-tRNA(Asn/Gln) amidotransferase subunit B [Beijerinckiaceae Ms08]	0	41	15	165	15	495	1.7866e+07	1.61079e+07	8.67278e+06	1.33922e+07	9.46795e+06	1.00387e+07	1.18552e+07	1.05569e+07
High	MS08_v1_3283	ID:23319014 PTSINtr with GAF domain, PtsP [Beijerinckiaceae Ms08]	0	40	27	176	27	754	1.36722e+07	1.37826e+07	8.2144e+06	1.18378e+07	8.12156e+06	8.16425e+06	6.34091e+06	8.15342e+06
High	MS08_v1_0342	ID:23316073 HflK protein [Beijerinckiaceae Ms08]	0	50	16	273	16	373	5.72326e+07	5.44325e+07	2.68082e+07	4.72579e+07	8.05168e+07	8.22248e+07	7.78601e+07	9.25517e+07
High	MS08_v1_1656	ID:23317387 conserved protein of unknown function [Beijerinckiaceae Ms08]	0	48	16	279	16	351	7.65431e+07	8.22907e+07	6.36516e+07	7.32702e+07	3.47394e+07	2.14853e+07	3.47951e+07	2.56662e+07
High	MS08_v1_1714	ID:23317445 Pyruvate ferredoxin/flavodoxin oxidoreductase [Beijerinckiaceae Ms08]	0	37	35	209	35	1167	7.9245e+06	7.86079e+06	3.38152e+06	6.32094e+06	8.18226e+06	7.84807e+06	1.06821e+07	8.67509e+06
High	MS08_v1_1914	ID:23317645 conserved exported protein of unknown function [Beijerinckiaceae Ms08]	0	74	24	179	24	351	1.97595e+07	1.79683e+07	1.50873e+07	2.24428e+07	3.06252e+06	3.14425e+06	6.79976e+06	3.37055e+06
High	MS08_v1_2306	ID:23318037 TPR repeat-containing protein [Beijerinckiaceae Ms08]	0	67	16	230	16	291	2.1876e+07	1.89321e+07	1.68912e+07	3.06216e+07	1.64322e+07	1.84201e+07	2.25288e+07	2.22488e+07
High	MS08_v1_2958	ID:23318689 putative Polyphenol oxidase, chloroplastic [Beijerinckiaceae Ms08]	0	42	16	331	16	514	1.35422e+07	1.24655e+07	2.90118e+07	2.06022e+07	1.64073e+08	1.54312e+08	1.49485e+08	1.7718e+08
High	MS08_v1_2893	ID:23318624 hisD| Histidinol dehydrogenase [Beijerinckiaceae Ms08]	0	58	18	190	18	433	2.37238e+07	2.2609e+07	1.1766e+07	1.78177e+07	4.79409e+06	6.20904e+06	6.38662e+06	5.41423e+06
High	MS08_v1_2239	ID:23317970 fabF| 3-oxoacyl-[acyl-carrier-protein] synthase II [Beijerinckiaceae Ms08]	0	71	19	144	19	420	1.1566e+07	1.14298e+07	1.04501e+07	1.3939e+07	6.72499e+06	7.00615e+06	8.15694e+06	8.08338e+06
High	MS08_v1_2365	ID:23318096 yidC| Membrane protein insertase YidC [Beijerinckiaceae Ms08]	0	36	19	247	19	617	3.48849e+07	3.27451e+07	1.79649e+07	2.77844e+07	1.59209e+07	1.53086e+07	1.77884e+07	1.40522e+07
High	MS08_v1_2158	ID:23317889 putative helicase [Beijerinckiaceae Ms08]	0	47	27	130	27	666	8.09174e+06	8.15377e+06	3.22637e+06	9.75895e+06	4.18755e+06	3.77841e+06	4.62818e+06	4.01614e+06
High	MS08_v1_2780	ID:23318511 nuoD| NADH-quinone oxidoreductase subunit D 1 [Beijerinckiaceae Ms08]	0	63	20	157	20	396	2.18555e+07	2.122e+07	1.42825e+07	1.88794e+07	6.80362e+06	1.00188e+07	6.92056e+06	4.97144e+06
High	MS08_v1_0916	ID:23316647 glnE| Glutamate-ammonia-ligase adenylyltransferase [Beijerinckiaceae Ms08]	0	38	30	230	30	982	6.57163e+06	6.23346e+06	4.74366e+06	5.667e+06	1.05603e+07	9.57544e+06	1.15562e+07	1.10142e+07
High	MS08_v1_1728	ID:23317459 thiC| thiamin (pyrimidine moiety) biosynthesis protein [Beijerinckiaceae Ms08]	0	53	27	139	27	610	6.93161e+06	6.34569e+06	3.63185e+06	7.98833e+06	3.4087e+06	3.9371e+06	5.67524e+06	4.71363e+06
High	MS08_v1_0391	ID:23316122 argH| Argininosuccinate lyase [Beijerinckiaceae Ms08]	0	48	20	224	20	462	1.27547e+07	1.27428e+07	3.54435e+06	1.04637e+07	7.93025e+06	6.39157e+06	8.48885e+06	7.1727e+06
High	MS08_v1_0272	ID:23316003 mfd| Transcription-repair-coupling factor [Beijerinckiaceae Ms08]	0	36	37	151	37	1172	5.79899e+06	5.55952e+06	1.28798e+06	4.21477e+06	918283	1.08658e+06	762754	969192
High	MS08_v1_0654	ID:23316385 hisS| Histidine--tRNA ligase [Beijerinckiaceae Ms08]	0	53	26	221	26	514	1.46389e+07	1.39102e+07	7.6448e+06	1.46226e+07	9.75134e+06	9.48969e+06	9.3101e+06	7.4155e+06
High	MS08_v1_0630	ID:23316361 proS| Proline--tRNA ligase [Beijerinckiaceae Ms08]	0	58	19	174	19	440	1.7424e+07	2.2604e+07	9.95044e+06	1.99219e+07	7.1434e+06	7.2947e+06	8.19316e+06	9.38047e+06
High	MS08_v1_0117	ID:23315848 pdxA| 4-hydroxythreonine-4-phosphate dehydrogenase [Beijerinckiaceae Ms08]	0	72	18	187	18	350	2.01706e+07	2.02806e+07	5.98001e+06	1.32689e+07	1.32236e+07	9.9939e+06	1.08811e+07	1.10292e+07
High	MS08_v1_1364	ID:23317095 Carbonic anhydrase [Beijerinckiaceae Ms08]	0	72	13	632	13	193	1.24935e+08	1.30199e+08	9.73338e+07	1.42309e+08	2.26791e+08	2.932e+08	3.51854e+08	3.04698e+08
High	MS08_v1_0172	ID:23315903 fae| Formaldehyde-activating enzyme [Beijerinckiaceae Ms08]	0	63	8	896	8	174	6.62155e+08	7.00387e+08	7.80792e+08	7.90302e+08	5.03153e+08	5.96468e+08	5.71842e+08	5.18013e+08
High	MS08_v1_1461	ID:23317192 conserved exported protein of unknown function [Beijerinckiaceae Ms08]	0	69	16	216	16	279	4.04511e+07	4.33025e+07	1.0309e+07	2.71094e+07	3.57751e+07	4.0377e+07	5.9434e+07	5.76142e+07
High	MS08_v1_3417	ID:23319148 Glycosyl transferase group 1 [Beijerinckiaceae Ms08]	0	48	15	148	15	372	2.50458e+07	2.23029e+07	1.02104e+07	1.75066e+07	6.77135e+06	8.64311e+06	7.37508e+06	8.72453e+06
High	MS08_v1_2112	ID:23317843 2-polyprenylphenol 6-hydroxylase [Beijerinckiaceae Ms08]	0	61	28	212	28	528	1.40991e+07	1.52715e+07	6.42051e+06	1.36107e+07	1.09032e+07	7.99294e+06	9.00451e+06	7.41779e+06
High	MS08_v1_0041	ID:23315772 pdhB| Pyruvate dehydrogenase E1 component subunit beta [Beijerinckiaceae Ms08]	0	45	15	175	15	484	2.09327e+07	2.02006e+07	9.65826e+07	1.7092e+07	3.27434e+07	3.07353e+07	3.49415e+07	4.38809e+07
High	MS08_v1_2019	ID:23317750 exoB| UDP-glucose 4-epimerase [Beijerinckiaceae Ms08]	0	67	18	177	18	342	1.38545e+07	1.39285e+07	1.10124e+07	1.31489e+07	9.84102e+06	1.15974e+07	1.40017e+07	1.11272e+07
High	MS08_v1_0127	ID:23315858 Redoxin domain protein [Beijerinckiaceae Ms08]	0	88	13	206	13	161	8.67499e+07	8.42914e+07	2.67988e+07	4.95256e+07	9.56858e+06	1.12067e+07	7.26335e+06	9.0516e+06
High	MS08_v1_0582	ID:23316313 Acyl-CoA dehydrogenase [Beijerinckiaceae Ms08]	0	54	24	205	24	597	4.2787e+06	4.93802e+06	5.43367e+06	7805923	1.40512e+07	1.45387e+07	1.37208e+07	1.55436e+07
High	MS08_v1_0291	ID:23316022 metG| Methionine--tRNA ligase [Beijerinckiaceae Ms08]	0	60	26	210	26	518	1.72078e+07	1.79449e+07	8.89509e+06	1.54386e+07	6.95038e+06	7.38879e+06	9.00391e+06	8.04451e+06
High	MS08_v1_2345	ID:23318076 aatA| Aspartate aminotransferase A [Beijerinckiaceae Ms08]	0	49	17	251	17	400	4.42926e+07	4.41694e+07	1.53354e+07	3.17322e+07	1.20547e+07	1.82885e+07	1.97518e+07	1.8615e+07
High	MS08_v1_1282	ID:23317013 conserved protein of unknown function [Beijerinckiaceae Ms08]	0	73	14	165	14	266	2.27123e+07	2.3527e+07	2.17814e+07	2.72528e+07	5.4045e+06	4.88944e+06	4.52124e+06	3.10247e+06
High	MS08_v1_1493	ID:23317224 rnr| Ribonuclease R [Beijerinckiaceae Ms08]	0	48	33	279	33	791	7.61437e+06	7.48e+06	2.79749e+06	8.4195e+06	1.31077e+07	1.52192e+07	1.26016e+07	1.49442e+07
High	MS08_v1_1234	ID:23316965 DHS| Phospho-2-dehydro-3-deoxyheptonate aldolase 1, chloroplastic [Beijerinckiaceae Ms08]	0	55	20	183	20	462	3.34654e+07	2.98839e+07	1.59028e+07	2.48633e+07	6.68916e+06	8.07573e+06	7.5091e+06	7.44338e+06
High	MS08_v1_0042	ID:23315773 pdhC| Dihydrolipoyllysine-residue acetyltransferase component of pyruvate dehydrogenase complex [Beijerinckiaceae Ms08]	0	65	21	210	21	451	1.48303e+07	1.60307e+07	8.33368e+06	1.27908e+07	2.56517e+07	2.94326e+07	3.29601e+07	3.13663e+07
High	MS08_v1_0386	ID:23316117 purL| Phosphoribosylformylglycinamidine synthase 2 [Beijerinckiaceae Ms08]	0	44	24	214	24	736	1.12126e+07	1.12744e+07	5.41282e+06	8.97334e+06	1.16025e+07	1.14694e+07	9.95001e+06	1.21669e+07
High	MS08_v1_0399	ID:23316130 etfB| electron transfer flavoprotein beta-subunit [Beijerinckiaceae Ms08]	0	69	16	261	16	249	3.57234e+07	3.57185e+07	1.93668e+07	2.84492e+07	1.81175e+07	2.18508e+07	2.25233e+07	2.25917e+07
High	MS08_v1_1351	ID:23317082 bfr| bacterioferritin, iron storage and detoxification protein [Beijerinckiaceae Ms08]	0	85	13	337	13	163	4.56611e+07	4.00814e+07	6.38054e+07	3.71591e+07	1.2192e+08	1.10336e+08	2.05881e+08	1.76128e+08
High	MS08_v1_2964	ID:23318695 cycH| Cytochrome c-type biogenesis protein CycH [Beijerinckiaceae Ms08]	0	60	21	139	21	366	1.10555e+07	1.33024e+07	4.78212e+06	1.00675e+07	1.16864e+06	1.21673e+06	1.55542e+06	2.01257e+06
High	MS08_v1_1997	ID:23317728 LemA family protein [Beijerinckiaceae Ms08]	0	61	13	315	13	238	8.57709e+07	6.66997e+07	7.87243e+07	8.82333e+07	1.24083e+08	9.27243e+07	1.03608e+08	9.15494e+07
High	MS08_v1_2224	ID:23317955 aspS| Aspartate--tRNA ligase [Beijerinckiaceae Ms08]	0	48	24	227	24	604	1.50772e+07	1.36932e+07	1.20271e+07	1.75933e+07	1.20523e+07	1.37575e+07	1.62564e+07	1.59782e+07
High	MS08_v1_0832	ID:23316563 conserved protein of unknown function [Beijerinckiaceae Ms08]	0	50	24	142	24	646	7.30896e+06	8.17458e+06	2.64099e+06	7.49585e+06	4.60279e+06	4.43126e+06	5.39199e+06	5.18022e+06
High	MS08_v1_2914	ID:23318645 ddl| D-alanine--D-alanine ligase [Beijerinckiaceae Ms08]	0	63	17	139	17	307	2.20044e+07	2.07376e+07	1.39e+07	1.85337e+07	2.32375e+06	3.15e+06	2.59369e+06	2.81576e+06
High	MS08_v1_3239	ID:23318970 moeA| Molybdopterin molybdenumtransferase [Beijerinckiaceae Ms08]	0	56	16	170	16	418	5.09221e+06	4.63388e+06	701594	5.06726e+06	6.63591e+06	7.83396e+06	6.53975e+06	7.71535e+06
High	MS08_v1_2517	ID:23318248 yciF| Protein YciF [Beijerinckiaceae Ms08]	0	78	16	587	16	162	6.76517e+06	5.7046e+06	7.3638e+06	4.24594e+06	9.892e+08	1.24776e+09	1.45306e+09	1.25892e+09
High	MS08_v1_1853	ID:23317584 fbp| Fructose-1,6-bisphosphatase class 1 [Beijerinckiaceae Ms08]	0	53	14	160	14	352	1.61655e+07	1.4362e+07	1.10642e+07	1.43729e+07	3.57304e+06	4.45548e+06	3.65078e+06	4.24309e+06
High	MS08_v1_0184	ID:23315915 protein of unknown function [Beijerinckiaceae Ms08]	0	47	23	118	23	562	6.82188e+06	7.90484e+06	3.22384e+06	8.34062e+06	2.02353e+06	1.99619e+06	1.4508e+06	1.97298e+06
High	MS08_v1_0680	ID:23316411 Fructose-bisphosphate aldolase [Beijerinckiaceae Ms08]	0	49	14	278	14	306	3.33432e+07	3.10581e+07	3.47284e+07	3.2719e+07	4.60044e+07	5.70245e+07	6.78811e+07	6.60509e+07
High	MS08_v1_0471	ID:23316202 rplJ| 50S ribosomal protein L10 [Beijerinckiaceae Ms08]	0	84	12	210	12	171	8.05177e+07	8.45297e+07	4.60111e+07	6.99505e+07	2.5986e+07	3.00309e+07	2.65338e+07	2.75839e+07
High	MS08_v1_2970	ID:23318701 silP| Silver exporting P-type ATPase [Beijerinckiaceae Ms08]	0	38	25	354	25	733	1.55159e+07	1.58299e+07	1.06392e+07	1.92672e+07	3.69144e+07	3.2962e+07	3.8253e+07	3.98931e+07
High	MS08_v1_1113	ID:23316844 ligA| DNA ligase, NAD(+)-dependent [Beijerinckiaceae Ms08]	0	51	29	139	29	702	5.13154e+06	6.26564e+06	2.23779e+06	5.42434e+06	3.96458e+06	4.12618e+06	3.471e+06	4.7689e+06
High	MS08_v1_2410	ID:23318141 fumA| fumarate hydratase (fumarase A), aerobic Class I [Beijerinckiaceae Ms08]	0	54	22	100	22	538	1.09266e+07	1.10556e+07	6.56614e+06	1.12322e+07	1.079e+06	1.334e+06	945230	925274
High	MS08_v1_0633	ID:23316364 putative peroxidase [Beijerinckiaceae Ms08]	0	48	19	177	19	550	9.0016e+06	9.3557e+06	1.44576e+07	1.19085e+07	1.20473e+07	1.12711e+07	9.22037e+06	1.52408e+07
High	MS08_v1_0536	ID:23316267 conserved membrane protein of unknown function [Beijerinckiaceae Ms08]	0	38	15	64	15	599	4.89563e+06	4.20803e+06	1.34191e+06	3.43881e+06	654771	676793	1.48062e+06	292473
High	MS08_v1_3078	ID:23318809 Nucleotide-binding protein-like protein [Beijerinckiaceae Ms08]	0	56	16	229	16	362	2.05717e+07	1.80496e+07	5.26623e+07	1.53371e+07	1.06439e+07	2.08283e+07	2.17444e+07	2.38205e+07
High	MS08_v1_0155	ID:23315886 fhcC| Formyltransferase/hydrolase complex Fhc subunit C [Beijerinckiaceae Ms08]	0	81	17	238	17	268	4.08133e+07	3.54105e+07	2.91354e+07	3.51403e+07	2.50661e+07	2.70877e+07	3.13236e+07	2.66713e+07
High	MS08_v1_1083	ID:23316814 putative Quercetin 2,3-dioxygenase [Beijerinckiaceae Ms08]	0	58	14	211	14	291	1.67145e+06	529720	1.41402e+06	662513	6.1297e+07	7.92883e+07	6.25121e+07	9.26053e+07
High	MS08_v1_0400	ID:23316131 etfA| Electron transfer flavoprotein subunit alpha [Beijerinckiaceae Ms08]	0	61	14	160	14	314	2.29409e+07	2.30378e+07	1.22256e+07	2.26847e+07	1.49989e+07	1.52302e+07	1.66768e+07	1.70335e+07
High	MS08_v1_0032	ID:23315763 argF| Ornithine carbamoyltransferase [Beijerinckiaceae Ms08]	0	69	20	163	20	318	1.53223e+07	1.72145e+07	9.42538e+06	15592450	5.03558e+06	5.87664e+06	8.71386e+06	6.32626e+06
High	MS08_v1_0237	ID:23315968 fadA| putative enzyme [Beijerinckiaceae Ms08]	0	44	12	214	12	402	1.33047e+07	1.58361e+07	6.13633e+06	1.35118e+07	2.34424e+07	3.44622e+07	4.2476e+07	3.54152e+07
High	MS08_v1_2044	ID:23317775 conserved exported protein of unknown function [Beijerinckiaceae Ms08]	0	34	11	306	11	439	1.63274e+08	1.6686e+08	5.37353e+07	1.83878e+08	5.15733e+07	1.56961e+08	1.90138e+08	1.53499e+08
High	MS08_v1_1958	ID:23317689 conserved exported protein of unknown function [Beijerinckiaceae Ms08]	0	61	15	178	15	333	1.57889e+07	1.37947e+07	7.49211e+06	9.95927e+06	1.55083e+07	1.86334e+07	1.76746e+07	1.73214e+07
High	MS08_v1_0246	ID:23315977 Ferredoxin--NADP reductase [Beijerinckiaceae Ms08]	0	49	14	164	14	345	4.26369e+07	4.24397e+07	4.35918e+07	2.97712e+07	3.2877e+06	5.76137e+06	4.36922e+06	3.81957e+06
High	MS08_v1_0650	ID:23316381 ABC transporter related [Beijerinckiaceae Ms08]	0	32	20	138	20	704	1.06004e+07	1.15307e+07	4.40561e+06	1.0964e+07	3.48908e+06	3.4496e+06	5.25179e+06	3.88909e+06
High	MS08_v1_2419	ID:23318150 prsA| phosphoribosylpyrophosphate synthase [Beijerinckiaceae Ms08]	0	39	13	204	13	310	2.71735e+07	2.59122e+07	1.70725e+07	2.20672e+07	1.2986e+07	1.41654e+07	1.47036e+07	1.38359e+07
High	MS08_v1_1266	ID:23316997 pckA| Phosphoenolpyruvate carboxykinase [ATP] [Beijerinckiaceae Ms08]	0	52	21	176	21	542	8.28704e+06	9.4994e+06	5.44361e+06	9.3669e+06	6.2488e+06	6.11792e+06	9.03655e+06	7.38049e+06
High	MS08_v1_3412	ID:23319143 conserved exported protein of unknown function [Beijerinckiaceae Ms08]	0	58	6	254	6	173	4.3373e+07	4.50589e+07	4.40989e+07	3.6927e+07	1.68902e+07	2.10315e+07	2.90218e+07	1.68231e+07
High	MS08_v1_0312	ID:23316043 conserved protein of unknown function [Beijerinckiaceae Ms08]	0	75	15	253	15	286	3.10137e+07	2.72378e+07	2.66448e+07	3.31471e+07	1.12203e+08	1.97891e+08	1.38968e+08	2.15183e+08
High	MS08_v1_2090	ID:23317821 Sulfotransferase [Beijerinckiaceae Ms08]	0	52	13	153	13	299	3.33094e+07	2.9914e+07	1.22985e+07	2.24375e+07	2.91899e+06	3.96958e+06	2.34883e+06	2.80281e+06
High	MS08_v1_0413	ID:23316144 glcB| malate synthase G [Beijerinckiaceae Ms08]	0	42	26	165	26	722	1.31601e+07	1.19447e+07	7.75573e+06	1.21892e+07	5.82817e+06	6.77185e+06	5.97435e+06	6.16563e+06
High	MS08_v1_3281	ID:23319012 ubiG| Ubiquinone biosynthesis O-methyltransferase [Beijerinckiaceae Ms08]	0	61	15	248	15	257	8.05644e+06	7.351e+06	6.65409e+06	8.78204e+06	7.81194e+07	8.20035e+07	6.87807e+07	9.17725e+07
High	MS08_v1_2576	ID:23318307 Methionine gamma lyase [Beijerinckiaceae Ms08]	0	43	12	70	12	393	3.03531e+07	2.63359e+07	2.06806e+06	5.36595e+06	439472	604789	678208	1.16649e+06
High	MS08_v1_0107	ID:23315838 conserved protein of unknown function [Beijerinckiaceae Ms08]	0	50	11	107	11	327	2.5254e+07	2.97923e+07	1.52331e+07	2.45161e+07	3.7249e+06	3.21114e+06	5.71522e+06	2.66291e+06
High	MS08_v1_1665	ID:23317396 Leucyl aminopeptidase [Beijerinckiaceae Ms08]	0	49	18	158	18	493	2.11667e+07	1.94484e+07	1.86007e+07	1.55635e+07	2.75036e+07	2.38275e+07	2.52061e+07	3.50078e+07
High	MS08_v1_2043	ID:23317774 trpS| Tryptophan--tRNA ligase [Beijerinckiaceae Ms08]	0	52	17	212	17	344	3.37797e+07	3.32537e+07	2.20201e+07	3.14941e+07	6.14915e+06	7.85905e+06	9.23034e+06	8.85595e+06
High	MS08_v1_3150	ID:23318881 smbP| Metal-binding protein SmbP [Beijerinckiaceae Ms08]	0	57	5	467	5	112	1.31929e+07	1.00469e+07	6.55915e+06	1.70416e+07	5.74175e+09	3.81215e+09	1.23961e+09	2.44524e+09
High	MS08_v1_1326	ID:23317057 mtnP| S-methyl-5'-thioadenosine phosphorylase [Beijerinckiaceae Ms08]	0	66	16	172	16	291	2.39761e+07	2.35798e+07	1.91908e+07	2.70657e+07	4.43451e+06	6.74389e+06	4.62911e+06	3.94558e+06
High	MS08_v1_2808	ID:23318539 conserved protein of unknown function [Beijerinckiaceae Ms08]	0	41	28	168	28	839	4.68417e+06	5.45008e+06	3.15418e+06	6.37643e+06	5.77047e+06	6.13664e+06	4.07684e+06	5.78291e+06
High	MS08_v1_0402	ID:23316133 hbdA| 3-hydroxybutyryl-CoA dehydrogenase [Beijerinckiaceae Ms08]	0	51	12	277	12	291	6.1275e+07	5.75624e+07	4.27713e+07	6.50064e+07	5.19672e+07	5.34818e+07	5.04803e+07	5.70728e+07
High	MS08_v1_0012	ID:23315743 Omega-amino acid--pyruvate aminotransferase [Beijerinckiaceae Ms08]	0	70	21	109	21	446	1.15673e+07	1.23958e+07	7.05109e+06	1.21686e+07	296540	405902	549373	111684
High	MS08_v1_3013	ID:23318744 conserved protein of unknown function [Beijerinckiaceae Ms08]	0	62	9	400	9	201	6.73522e+07	5.78194e+07	5.01969e+07	6.94761e+07	6.32608e+08	8.42604e+08	9.52003e+08	9.81275e+08
High	MS08_v1_1051	ID:23316782 conserved protein of unknown function [Beijerinckiaceae Ms08]	0	52	25	199	25	558	1.18867e+07	1.09643e+07	5.84323e+06	1.15965e+07	1.06754e+07	9.76104e+06	8.77304e+06	1.07129e+07
High	MS08_v1_0457	ID:23316188 rplB| 50S ribosomal subunit protein L2 [Beijerinckiaceae Ms08]	0	46	12	294	12	279	8.86084e+07	9.57236e+07	1.83076e+08	9.23471e+07	8.04623e+07	6.45374e+07	6.74508e+07	9.51968e+07
High	MS08_v1_3297	ID:23319028 purH| fused IMP cyclohydrolase ; phosphoribosylaminoimidazolecarboxamide formyltransferase [Beijerinckiaceae Ms08]	0	52	23	140	23	530	1.1956e+07	9.66198e+06	3.79891e+06	9.33968e+06	4.79012e+06	4.53134e+06	4.54249e+06	4.91327e+06
High	MS08_v1_0959	ID:23316690 conserved protein of unknown function [Beijerinckiaceae Ms08]	0	42	18	155	18	505	1.23528e+07	1.26604e+07	3.52429e+07	3.81237e+07	3.53862e+07	1.16283e+07	5.78854e+06	5.93092e+06
High	MS08_v1_3433	ID:23319164 parE| DNA topoisomerase 4 subunit B [Beijerinckiaceae Ms08]	0	43	24	137	24	690	1.10775e+07	1.27086e+07	8.11773e+06	1.1044e+07	1.24927e+06	1.41467e+06	1.45952e+06	1.40494e+06
High	MS08_v1_1138	ID:23316869 lysS| Lysine--tRNA ligase [Beijerinckiaceae Ms08]	0	39	21	150	21	579	6.77679e+06	6.83553e+06	3.38099e+06	7.7359e+06	4.83786e+06	4.81666e+06	5.33293e+06	5.19563e+06
High	MS08_v1_2143	ID:23317874 conserved exported protein of unknown function [Beijerinckiaceae Ms08]	0	64	9	277	8	205	4.8558e+07	4.9703e+07	4.56523e+07	4.83964e+07	8.50601e+07	8.90781e+07	5.65345e+07	6.92112e+07
High	MS08_v1_1689	ID:23317420 fabI| enoyl-[acyl-carrier-protein] reductase, NADH-dependent [Beijerinckiaceae Ms08]	0	77	18	244	18	282	3.45362e+07	3.34147e+07	1.87053e+07	2.8905e+07	3.59038e+06	4.37424e+06	4.09165e+06	3.43947e+06
High	MS08_v1_3331	ID:23319062 DSBA oxidoreductase [Beijerinckiaceae Ms08]	0	61	15	332	15	278	9.36632e+07	9.96042e+07	6.27853e+07	9.46486e+07	5.17104e+07	5.7646e+07	9.1556e+07	6.04114e+07
High	MS08_v1_3312	ID:23319043 putative aldo/keto reductase [Beijerinckiaceae Ms08]	0	52	18	285	18	353	1.06186e+07	1.05648e+07	2.3739e+06	8.24394e+06	1.11678e+08	1.32663e+08	2.09639e+08	1.6658e+08
High	MS08_v1_3071	ID:23318802 Sulfite reductase (Ferredoxin) [Beijerinckiaceae Ms08]	0	41	21	154	21	552	1.58856e+07	1.61119e+07	1.64606e+07	1.81642e+07	1.7753e+06	1.60597e+06	1.79877e+06	1.24836e+06
High	MS08_v1_0606	ID:23316337 ssb| Single-stranded DNA-binding protein [Beijerinckiaceae Ms08]	0	66	13	202	13	164	3.37891e+07	3.31919e+07	2.7533e+07	3.9052e+07	3.95266e+06	4.817e+06	5.6346e+06	3.15543e+06
High	MS08_v1_0302	ID:23316033 conserved protein of unknown function [Beijerinckiaceae Ms08]	0	48	17	244	17	374	2.13409e+07	2.44908e+07	6.29262e+07	6.17074e+07	4.80699e+07	4.78962e+07	3.47511e+07	5.26627e+07
High	MS08_v1_0913	ID:23316644 mdmC| O-methyltransferase MdmC [Beijerinckiaceae Ms08]	0	88	17	209	17	224	1.45601e+07	1.29014e+07	5.26246e+06	1.17129e+07	3.11709e+07	3.3455e+07	4.64549e+07	4.30831e+07
High	MS08_v1_0692	ID:23316423 Sugar isomerase (SIS) [Beijerinckiaceae Ms08]	0	73	21	240	21	346	8.66957e+06	7.39581e+06	2.68103e+06	5.71134e+06	1.93419e+07	1.90931e+07	2.92618e+07	2.38863e+07
High	MS08_v1_1433	ID:23317164 oxdD| Oxalate decarboxylase OxdD [Beijerinckiaceae Ms08]	0	35	12	221	12	426	2.49051e+07	2.74107e+07	2.31691e+07	3.15752e+07	3.76163e+07	4.49402e+07	5.08106e+07	4.87702e+07
High	MS08_v1_2080	ID:23317811 ErfK/YbiS/YcfS/YnhG family protein [Beijerinckiaceae Ms08]	0	35	17	171	17	604	1.25824e+07	1.29279e+07	7.07604e+06	1.34733e+07	5.14259e+06	5.73077e+06	8.365e+06	4.55484e+06
High	MS08_v1_1526	ID:23317257 putative voltage-gated potassium channel subunit beta [Beijerinckiaceae Ms08]	0	76	17	180	17	318	1.35885e+07	1.22552e+07	7.03206e+06	1.12313e+07	1.27499e+07	1.52826e+07	2.09589e+07	1.61117e+07
High	MS08_v1_2578	ID:23318309 putative siderophore biosynthesis protein [Beijerinckiaceae Ms08]	0	49	16	148	16	375	5.391e+07	4.74542e+07	125610	6.5733e+06		388561		107530
High	MS08_v1_1593	ID:23317324 conserved membrane protein of unknown function [Beijerinckiaceae Ms08]	0	54	16	151	16	338	1.37369e+07	1.29439e+07	9.27919e+06	1.31504e+07	1.04902e+07	6.7012e+06	5.879e+06	5.68314e+06
High	MS08_v1_3138	ID:23318869 Uncharacterized oxidoreductase TM_0325 [Beijerinckiaceae Ms08]	0	72	16	258	16	248	7.69436e+06	8.48118e+06	864326	3.38433e+06	5.85531e+07	6.73959e+07	1.1383e+08	7.60107e+07
High	MS08_v1_3181	ID:23318912 Phasin [Beijerinckiaceae Ms08]	0	81	12	462	12	120	1.92128e+08	1.97791e+08	1.42272e+08	1.95648e+08	3.42649e+08	4.43236e+08	4.73402e+08	4.90424e+08
High	MS08_v1_1122	ID:23316853 Acyl-CoA dehydrogenase-like [Beijerinckiaceae Ms08]	0	51	22	171	22	549	1.04884e+06	877058	3.20551e+06	1.34491e+06	2.55244e+07	3.01524e+07	3.398e+07	3.26565e+07
High	MS08_v1_1627	ID:23317358 coxM| Carbon monoxide dehydrogenase medium chain [Beijerinckiaceae Ms08]	0	55	12	223	12	288	22245.5			68723.9	1.08814e+08	1.24676e+08	1.83911e+08	1.67496e+08
High	MS08_v1_1243	ID:23316974 ychF| putative GTP-binding protein [Beijerinckiaceae Ms08]	0	51	18	166	18	365	1.99304e+07	1.82992e+07	8.44926e+06	1.67173e+07	4.76731e+06	6.207e+06	5.83996e+06	4.10231e+06
High	MS08_v1_1835	ID:23317566 minD| cell division inhibitor, a membrane ATPase,activates minC [Beijerinckiaceae Ms08]	0	61	17	127	17	271	1.93924e+07	2.19732e+07	1.19903e+07	2.18014e+07	1.68733e+06	1.85343e+06	1.80727e+06	1.84541e+06
High	MS08_v1_0796	ID:23316527 ispG| 4-hydroxy-3-methylbut-2-en-1-yl diphosphate synthase [Beijerinckiaceae Ms08]	0	59	22	135	22	433	1.07618e+07	1.18563e+07	6.56133e+06	1.3712e+07	550033	1.31132e+06	731287	1.16193e+06
High	MS08_v1_3213	ID:23318944 putative membrane transporter [Beijerinckiaceae Ms08]	0	36	25	123	25	791	1.00167e+07	8.8741e+06	2.59362e+06	7.16142e+06	681292	758991	2.05565e+06	618774
High	MS08_v1_1843	ID:23317574 ttuD| putative hydroxypyruvate reductase [Beijerinckiaceae Ms08]	0	43	12	157	12	421	2.10921e+07	2.05513e+07	1.23629e+07	1.81391e+07	6.46993e+06	7.53444e+06	5.54074e+06	6.72746e+06
High	MS08_v1_2442	ID:23318173 shc| putative squalene--hopene cyclase [Beijerinckiaceae Ms08]	0	43	22	91	22	660	1.22316e+07	1.20795e+07	3.2373e+06	8.76948e+06	16767.9		1.01049e+06	45892.4
High	MS08_v1_3156	ID:23318887 CreA family protein [Beijerinckiaceae Ms08]	0	69	11	200	11	154	3.5763e+07	3.23795e+07	3.09203e+07	3.61538e+07	2.76629e+07	3.94641e+07	4.67037e+07	2.4564e+07
High	MS08_v1_1306	ID:23317037 Extracellular ligand-binding receptor [Beijerinckiaceae Ms08]	0	48	13	169	13	415	1.8859e+07	1.86158e+07	1.28125e+07	2.22298e+07	8.77652e+06	1.30164e+07	1.46542e+07	1.22967e+07
High	MS08_v1_2119	ID:23317850 ErfK/YbiS/YcfS/YnhG family protein [Beijerinckiaceae Ms08]	0	56	12	222	10	250	4.87717e+07	4.8275e+07	6.27569e+07	7.1857e+07	1.66665e+07	2.32945e+07	7.61963e+06	1.81968e+07
High	MS08_v1_2782	ID:23318513 nuoF| NADH:ubiquinone oxidoreductase, chain F [Beijerinckiaceae Ms08]	0	38	15	146	15	436	1.57691e+07	1.85288e+07	1.22315e+07	2.2065e+07	9.99646e+06	1.13141e+07	9.86646e+06	1.13549e+07
High	MS08_v1_0735	ID:23316466 Mammalian cell entry related domain protein [Beijerinckiaceae Ms08]	0	64	18	162	18	307	1.98553e+07	1.97277e+07	1.23985e+07	1.93415e+07	2.97178e+06	3.14528e+06	1.71078e+06	2.79643e+06
High	MS08_v1_2834	ID:23318565 sucC| succinyl-CoA synthetase, beta subunit [Beijerinckiaceae Ms08]	0	61	21	163	21	398	1.4392e+07	1.43118e+07	6.93151e+06	1.00036e+07	3.3599e+06	4.51719e+06	4.42867e+06	3.52483e+06
High	MS08_v1_1087	ID:23316818 putative phosphoketolase [Beijerinckiaceae Ms08]	0	37	25	213	25	818	2.90181e+06	3.40703e+06	3.37454e+06	6.23776e+06	2.44208e+07	2.47274e+07	2.54213e+07	2.60424e+07
High	MS08_v1_0028	ID:23315759 conserved exported protein of unknown function [Beijerinckiaceae Ms08]	0	45	22	173	22	615	6.22929e+06	5.64067e+06	2.88254e+06	4.9975e+06	1.64105e+07	1.40678e+07	1.67791e+07	1.51159e+07
High	MS08_v1_0454	ID:23316185 rpsC| 30S ribosomal subunit protein S3 [Beijerinckiaceae Ms08]	0	56	13	216	13	240	7.03435e+07	7.60161e+07	4.66274e+07	7.06841e+07	3.36578e+07	3.13591e+07	2.95828e+07	2.9164e+07
High	MS08_v1_2332	ID:23318063 Sensory box histidine kinase (fragment) [Beijerinckiaceae Ms08]	0	51	20	205	20	377	1.74822e+07	1.48691e+07	9.80444e+06	1.6005e+07	1.78792e+07	1.7332e+07	2.20238e+07	1.99766e+07
High	MS08_v1_0420	ID:23316151 Peptidase C14 caspase catalytic subunit p20 [Beijerinckiaceae Ms08]	0	40	21	159	21	742	1.16019e+07	1.17159e+07	3.25399e+06	1.07059e+07	3.67927e+06	3.42864e+06	5.57132e+06	3.45408e+06
High	MS08_v1_0439	ID:23316170 adk| Adenylate kinase [Beijerinckiaceae Ms08]	0	79	14	245	14	193	2.77675e+07	2.89135e+07	1.54566e+07	2.67407e+07	2.63857e+07	3.4104e+07	3.2648e+07	3.75688e+07
High	MS08_v1_1241	ID:23316972 rplY| 50S ribosomal protein L25 [Beijerinckiaceae Ms08]	0	63	12	203	12	232	8.14869e+07	9.10952e+07	7.06886e+07	83478912	3.83206e+07	4.4365e+07	3.33538e+07	4.34761e+07
High	MS08_v1_1711	ID:23317442 pqqC| Pyrroloquinoline-quinone synthase [Beijerinckiaceae Ms08]	0	63	15	217	15	253	3.55086e+07	3.40351e+07	2.60601e+07	3.29196e+07	9.77618e+06	1.12842e+07	1.13418e+07	1.08472e+07
High	MS08_v1_2839	ID:23318570 LPD| Dihydrolipoyl dehydrogenase 1, mitochondrial [Beijerinckiaceae Ms08]	0	50	18	157	18	465	1.01717e+07	9.46591e+06	3.76942e+06	6.23133e+06	1.07647e+07	1.18669e+07	1.38159e+07	1.24791e+07
High	MS08_v1_0019	ID:23315750 rpsD| 30S ribosomal protein S4 [Beijerinckiaceae Ms08]	0	59	16	256	16	205	8.71992e+07	8.8734e+07	5.82178e+07	9.11618e+07	2.94162e+07	4.01387e+07	2.68891e+07	2.58966e+07
High	MS08_v1_3025	ID:23318756 conserved protein of unknown function [Beijerinckiaceae Ms08]	0	48	18	235	18	390	1.85512e+07	1.92577e+07	1.58531e+07	1.97075e+07	1.7869e+07	1.62563e+07	1.74497e+07	2.05134e+07
High	MS08_v1_3468	ID:23319199 conserved exported protein of unknown function [Beijerinckiaceae Ms08]	0	65	14	119	14	299	2.05765e+07	1.88699e+07	6.98558e+06	1.5631e+07	7.5923e+06	8.04879e+06	2.8835e+07	7.91921e+06
High	MS08_v1_3236	ID:23318967 conserved protein of unknown function [Beijerinckiaceae Ms08]	0	51	20	168	20	439	1.36134e+07	1.19526e+07	4.88497e+06	1.07853e+07	5.64641e+06	5.45068e+06	5.85368e+06	4.89121e+06
High	MS08_v1_0613	ID:23316344 murA| UDP-N-acetylglucosamine 1-carboxyvinyltransferase [Beijerinckiaceae Ms08]	0	53	19	181	19	431	1.78927e+07	1.65458e+07	1.96482e+07	1.78629e+07	1.66485e+06	2.67005e+06	3.35187e+06	1.94448e+06
High	MS08_v1_0031	ID:23315762 argD| Acetylornithine aminotransferase 1 [Beijerinckiaceae Ms08]	0	52	16	111	16	403	1.19359e+07	1.12757e+07	5.52752e+06	8.20104e+06	2.49926e+06	3.0778e+06	4.43049e+06	2.74462e+06
High	MS08_v1_2135	ID:23317866 conserved exported protein of unknown function [Beijerinckiaceae Ms08]	0	33	13	213	13	528	1.56943e+07	1.37208e+07	9.73687e+06	1.51627e+07	1.0147e+07	1.27723e+07	1.37052e+07	1.02447e+07
High	MS08_v1_1175	ID:23316906 conserved protein of unknown function [Beijerinckiaceae Ms08]	0	59	22	249	22	363	1.62823e+07	1.92617e+07	1.77471e+07	2.78427e+07	3.24342e+07	3.84229e+07	2.33614e+07	3.80987e+07
High	MS08_v1_2091	ID:23317822 5'-Nucleotidase domain protein [Beijerinckiaceae Ms08]	0	40	17	89	17	532	7.4223e+06	8.46643e+06	2.01723e+06	6.59485e+06
High	MS08_v1_0893	ID:23316624 lepA| GTP-binding membrane protein [Beijerinckiaceae Ms08]	0	41	19	88	19	601	9.95146e+06	9.77812e+06	5.85002e+06	8.11593e+06	1.33093e+06	2.08631e+06	1.68244e+06	1.36569e+06
High	MS08_v1_0250	ID:23315981 ppi| putative peptidyl-prolyl cis-trans isomerase [Beijerinckiaceae Ms08]	0	75	8	267	8	151	6.93018e+07	6.41153e+07	4.46614e+07	6.69582e+07	3.4548e+07	4.4374e+07	6.00543e+07	4.13509e+07
High	MS08_v1_2251	ID:23317982 Porin [Beijerinckiaceae Ms08]	0	25	12	204	3	587	4.42157e+07	4.6516e+07	2.38678e+07	4.44011e+07	1.43971e+07	3.57355e+07	4.06799e+07	3.25724e+07
High	MS08_v1_1805	ID:23317536 Efflux transporter, RND family, MFP subunit [Beijerinckiaceae Ms08]	0	51	17	173	17	408	8.67723e+06	7.87243e+06	1.42799e+06	4.22644e+06	1.24949e+07	1.11671e+07	1.55999e+07	1.26311e+07
High	MS08_v1_1199	ID:23316930 Allophanate hydrolase (fragment) [Beijerinckiaceae Ms08]	0	54	21	244	21	455	3.69448e+06	3.37628e+06	2.24341e+06	4.52246e+06	1.50383e+07	1.49796e+07	2.5042e+07	2.19923e+07
High	MS08_v1_1538	ID:23317269 protein of unknown function [Beijerinckiaceae Ms08]	0	69	15	148	15	267	1.55763e+07	1.46648e+07	1.73987e+07	1.62886e+07	8.73963e+06	1.05256e+07	1.2713e+07	1.46738e+07
High	MS08_v1_0359	ID:23316090 modA| Molybdate-binding periplasmic protein [Beijerinckiaceae Ms08]	0	56	11	157	11	280	2.6206e+07	2.29824e+07	7.47831e+06	1.51791e+07	1.1464e+07	9.36954e+06	1.62425e+07	1.39913e+07
High	MS08_v1_1227	ID:23316958 gltX| Glutamate--tRNA ligase 2 [Beijerinckiaceae Ms08]	0	59	23	236	23	450	1.69207e+07	1.68331e+07	8.56552e+06	1.3642e+07	1.82339e+07	1.60827e+07	1.95253e+07	1.96731e+07
High	MS08_v1_3247	ID:23318978 aapJ| amino-acid transporter subunit ; periplasmic-binding component of ABC superfamily [Beijerinckiaceae Ms08]	0	47	15	210	15	337	4.07518e+07	3.6381e+07	1.77983e+07	2.81036e+07	1.35087e+07	1.35222e+07	1.8065e+07	1.27185e+07
High	MS08_v1_2803	ID:23318534 Protein kinase [Beijerinckiaceae Ms08]	0	54	24	101	24	581	4.84652e+06	4.57266e+06	4.16798e+06	6.6417e+06	259634	647953	1.58087e+06	214583
High	MS08_v1_2356	ID:23318087 Precorrin-3B synthase [Beijerinckiaceae Ms08]	0	49	24	113	24	600	8.04663e+06	8.41781e+06	8.50496e+06	9.30284e+06	1.49643e+06	213125	35525.7	153285
High	MS08_v1_0825	ID:23316556 FeS assembly protein SufD [Beijerinckiaceae Ms08]	0	50	17	188	17	470	7.25675e+06	7.71318e+06	2.28243e+06	4.9601e+06	4.25261e+06	5.46908e+06	7.74068e+06	5.13464e+06
High	MS08_v1_0021	ID:23315752 ATP synthase subunit b 2 (modular protein) [Beijerinckiaceae Ms08]	0	48	13	132	13	361	3.48731e+07	3.8709e+07	1.98569e+07	3.35136e+07	7.35128e+06	9.10707e+06	1.10266e+07	9.29821e+06
High	MS08_v1_1469	ID:23317200 conserved protein of unknown function [Beijerinckiaceae Ms08]	0	45	11	215	11	205	5.33066e+07	4.91954e+07	1.9402e+07	3.02332e+07	1.80617e+07	2.1677e+07	3.10863e+07	2.30944e+07
High	MS08_v1_2792	ID:23318523 Beta-lactamase domain protein [Beijerinckiaceae Ms08]	0	46	19	181	19	556	8.66615e+06	7.48558e+06	2.7905e+06	6.35136e+06	9.07421e+06	9.24816e+06	1.13351e+07	9.91353e+06
High	MS08_v1_0135	ID:23315866 thrC| Threonine synthase [Beijerinckiaceae Ms08]	0	61	20	88	20	472	6.75006e+06	6.82452e+06	2.98387e+06	5.61184e+06	1.2503e+06	1.10194e+06	1.03808e+06	1.14585e+06
High	MS08_v1_0498	ID:23316229 pyrG| CTP synthetase [Beijerinckiaceae Ms08]	0	42	19	135	19	542	8.60589e+06	8.23136e+06	1.20238e+07	8.44495e+06	3.85936e+06	3.22466e+06	3.4128e+06	3.95144e+06
High	MS08_v1_0474	ID:23316205 nusG| transcription termination factor [Beijerinckiaceae Ms08]	0	77	13	148	13	176	4.07088e+07	3.18168e+07	2.85575e+07	2.94277e+07	2.0545e+07	3.20077e+07	3.0345e+07	2.96355e+07
High	MS08_v1_0441	ID:23316172 rplO| 50S ribosomal subunit protein L15 [Beijerinckiaceae Ms08]	0	65	9	227	9	162	5.50696e+07	5.7144e+07	5.0478e+07	5.28611e+07	2.3522e+07	2.91194e+07	1.98875e+07	2.76292e+07
High	MS08_v1_2269	ID:23318000 ErfK/YbiS/YcfS/YnhG family protein [Beijerinckiaceae Ms08]	0	73	13	133	13	203	1.67192e+07	1.33271e+07	1.0058e+07	1.70605e+07	708831	1.16017e+06	226956	181376
High	MS08_v1_0104	ID:23315835 Multi-sensor hybrid histidine kinase [Beijerinckiaceae Ms08]	0	38	26	147	26	839	9.80707e+06	9.00952e+06	4.66278e+06	1.07692e+07	542440	285131	286482	601500
High	MS08_v1_0839	ID:23316570 tyrS| Tyrosine--tRNA ligase [Beijerinckiaceae Ms08]	0	47	15	163	15	422	1.15549e+07	1.15742e+07	5.3527e+06	1.00197e+07	7.19806e+06	8.64885e+06	1.01818e+07	8.81078e+06
High	MS08_v1_1507	ID:23317238 putative enzyme [Beijerinckiaceae Ms08]	0	48	15	242	15	381	3.09502e+07	3.86566e+07	8.28288e+07	2.60596e+07	6.38635e+07	5.34583e+07	7.13215e+07	5.79953e+07
High	MS08_v1_2478	ID:23318209 hrcA| Heat-inducible transcription repressor HrcA [Beijerinckiaceae Ms08]	0	58	18	145	18	370	8.05413e+06	6.88916e+06	3.52606e+06	8.16378e+06	2.01205e+06	1.95037e+06	2.2086e+06	1.7415e+06
High	MS08_v1_1959	ID:23317690 conserved exported protein of unknown function [Beijerinckiaceae Ms08]	0	46	13	143	13	399	6.12412e+06	5.43177e+06	1.10471e+06	5.23337e+06	8.45053e+06	1.15662e+07	1.48984e+07	1.03864e+07
High	MS08_v1_2911	ID:23318642 murG| UDP-N-acetylglucosamine--N-acetylmuramyl-(pentapeptide) pyrophosphoryl-undecaprenol N-acetylglucosamine transferase [Beijerinckiaceae Ms08]	0	50	15	137	15	370	1.14181e+07	1.3007e+07	8.42497e+06	1.2176e+07	4.06367e+06	4.32852e+06	4.95457e+06	3.7825e+06
High	MS08_v1_2605	ID:23318336 cobT| Aerobic cobaltochelatase subunit CobT [Beijerinckiaceae Ms08]	0	41	24	94	24	649	2.87235e+06	3.05456e+06	503663	4.38254e+06	1.35041e+06	484670	800919	877643
High	MS08_v1_0636	ID:23316367 conserved protein of unknown function [Beijerinckiaceae Ms08]	0	54	14	116	14	282	2.01484e+07	2.07802e+07	6.80645e+06	1.24619e+07	774250	936817	598924	390243
High	MS08_v1_1270	ID:23317001 Signal transduction histidine kinase [Beijerinckiaceae Ms08]	0	46	19	214	19	481	9.01821e+06	9.29229e+06	7.00996e+06	9.52685e+06	1.70314e+07	1.72771e+07	1.67829e+07	1.88426e+07
High	MS08_v1_3445	ID:23319176 mucR| Transcriptional regulatory protein MucR [Beijerinckiaceae Ms08]	0	51	7	190	7	140	3.70336e+07	4.24153e+07	5.24258e+07	6.10206e+07	4.59696e+07	6.67918e+07	5.23978e+07	9.78307e+07
High	MS08_v1_0602	ID:23316333 Carbohydrate kinase, YjeF related protein [Beijerinckiaceae Ms08]	0	51	19	167	19	538	6.57842e+06	6.20346e+06	3.20936e+06	6.61804e+06	1.18886e+07	1.15757e+07	1.35143e+07	1.31733e+07
High	MS08_v1_1858	ID:23317589 Porin [Beijerinckiaceae Ms08]	0	27	12	188	3	549	5.90935e+06	6.16417e+06	2.92102e+06	7.01313e+06	1.15068e+06	2.78521e+06	5.04536e+06	3.35671e+06
High	MS08_v1_0281	ID:23316012 argS| Arginine--tRNA ligase [Beijerinckiaceae Ms08]	0	36	18	131	18	592	4.61139e+06	5.37404e+06	1.85739e+06	4.64672e+06	1.73365e+06	1.99651e+06	2.23131e+06	1.81303e+06
High	MS08_v1_1740	ID:23317471 conserved exported protein of unknown function [Beijerinckiaceae Ms08]	0	62	12	237	12	217	5.24543e+07	5.47287e+07	2.64622e+07	3.3751e+07	2.46471e+07	2.94961e+07	3.01377e+07	3.23492e+07
High	MS08_v1_3264	ID:23318995 bepC| Outer membrane efflux protein BepC [Beijerinckiaceae Ms08]	0	51	21	174	21	485	1.33139e+07	1.19188e+07	4.06126e+06	8.3268e+06	5.90373e+06	5.57024e+06	1.37356e+07	5.26942e+06
High	MS08_v1_0189	ID:23315920 Xanthine dehydrogenase, molybdenum binding subunit apoprotein [Beijerinckiaceae Ms08]	0	43	27	215	27	759	5.40933e+06	5.05882e+06	4.13769e+06	6.96399e+06	1.28434e+07	1.57471e+07	1.58088e+07	1.46106e+07
High	MS08_v1_2541	ID:23318272 putative Transcriptional regulator, LysR family [Beijerinckiaceae Ms08]	0	56	15	239	15	286	3.30897e+07	3.04973e+07	2.34202e+07	2.51083e+07	5.02732e+07	4.68473e+07	4.00229e+07	5.01249e+07
High	MS08_v1_0255	ID:23315986 conserved protein of unknown function [Beijerinckiaceae Ms08]	0	37	19	183	19	519	1.59425e+07	1.50373e+07	9.04579e+06	1.43197e+07	9.77771e+06	7.97785e+06	8.22731e+06	7.61883e+06
High	MS08_v1_0397	ID:23316128 Cob(I)yrinic acid a,c-diamide adenosyltransferase [Beijerinckiaceae Ms08]	0	68	13	201	13	194	2.55073e+07	2.14993e+07	7.20126e+06	1.48146e+07	1.97363e+07	1.7349e+07	1.94858e+07	1.85085e+07
High	MS08_v1_1686	ID:23317417 Chaperone DnaJ domain protein [Beijerinckiaceae Ms08]	0	54	16	151	16	320	1.03869e+07	8.74618e+06	5.23001e+06	1.0709e+07	2.80932e+06	2.9963e+06	2.22074e+06	2.24699e+06
High	MS08_v1_2909	ID:23318640 murD| UDP-N-acetylmuramoylalanine--D-glutamate ligase [Beijerinckiaceae Ms08]	0	33	15	143	15	466	1.66801e+07	1.40639e+07	8.5737e+06	1.35278e+07	5.03355e+06	6.44555e+06	6.57033e+06	5.52556e+06
High	MS08_v1_0445	ID:23316176 rplF| 50S ribosomal subunit protein L6 [Beijerinckiaceae Ms08]	0	56	12	263	12	177	7.98553e+07	7.68668e+07	5.55041e+07	6.50358e+07	2.00413e+07	3.11494e+07	2.71463e+07	3.25641e+07
High	MS08_v1_1604	ID:23317335 conserved exported protein of unknown function [Beijerinckiaceae Ms08]	0	75	18	126	18	323	8.69289e+06	8.33353e+06	9.1433e+06	7.04017e+06	3.85677e+06	3.6758e+06	5.4916e+06	3.71359e+06
High	MS08_v1_1955	ID:23317686 Cytochrome c-554 [Beijerinckiaceae Ms08]	0	60	7	358	7	133	7.31573e+07	8.59446e+07	1.08499e+08	1.3667e+08	1.29555e+08	1.73949e+08	1.64329e+08	1.57861e+08
High	MS08_v1_1333	ID:23317064 conserved membrane protein of unknown function [Beijerinckiaceae Ms08]	0	49	18	183	18	442	1.75263e+07	1.63337e+07	1.91905e+07	2.00404e+07	2.36371e+07	2.35955e+07	2.64365e+07	2.29168e+07
High	MS08_v1_0380	ID:23316111 conserved protein of unknown function [Beijerinckiaceae Ms08]	0	66	8	199	8	117	7.17232e+07	6.6882e+07	3.30934e+07	5.36678e+07	1.83985e+07	1.83285e+07	1.36044e+07	1.60413e+07
High	MS08_v1_1731	ID:23317462 phbB| Acetoacetyl-CoA reductase [Beijerinckiaceae Ms08]	0	59	15	247	15	241	6.33338e+07	6.25593e+07	5.99452e+07	7.19719e+07	4.24563e+07	5.23267e+07	4.7977e+07	5.49105e+07
High	MS08_v1_0282	ID:23316013 Sporulation domain protein [Beijerinckiaceae Ms08]	0	34	15	138	15	459	3.07206e+07	2.92371e+07	2.06386e+07	3.94716e+07	3.90955e+06	1.86254e+06	3.85176e+06	1.39928e+06
High	MS08_v1_3207	ID:23318938 maeB| putative fused malic enzyme oxidoreductase ; putative phosphotransacetylase [Beijerinckiaceae Ms08]	0	35	22	129	22	793	5.06029e+06	5.56615e+06	4.7146e+06	6.2457e+06	2.50195e+06	2.68823e+06	2.40586e+06	2.17117e+06
High	MS08_v1_1942	ID:23317673 8-amino-7-oxononanoate synthase [Beijerinckiaceae Ms08]	0	46	15	87	15	457	7.57692e+06	7.11399e+06	4.25572e+06	6.13266e+06	57037.6	60088.8	51002.2	207586
High	MS08_v1_3287	ID:23319018 conserved protein of unknown function [Beijerinckiaceae Ms08]	0	55	17	202	17	424	8.24748e+06	7.76136e+06	4.51731e+06	1.17722e+07	9.34425e+06	1.1222e+07	9.88717e+06	1.06092e+07
High	MS08_v1_0594	ID:23316325 clpP| ATP-dependent Clp protease proteolytic subunit (Endopeptidase Clp) (Caseinolytic protease) (Protease Ti) (Heat shock protein F21.5) [Beijerinckiaceae Ms08]	0	54	12	302	12	214	5.40649e+07	6.46172e+07	4.20405e+07	6.09819e+07	4.15881e+07	5.84408e+07	6.58388e+07	5.23613e+07
High	MS08_v1_2946	ID:23318677 NADH dehydrogenase, FAD-containing subunit [Beijerinckiaceae Ms08]	0	40	16	182	16	438	1.89793e+07	1.96545e+07	1.59483e+07	2.14689e+07	1.61919e+07	1.29494e+07	2.32253e+07	1.30202e+07
High	MS08_v1_2246	ID:23317977 rpsF| 30S ribosomal protein S6 [Beijerinckiaceae Ms08]	0	58	8	161	8	149	2.73519e+07	2.50127e+07	2.06529e+07	3.36101e+07	7.72402e+06	1.00409e+07	8.53779e+06	8.10792e+06
High	MS08_v1_0084	ID:23315815 greA| transcription elongation factor [Beijerinckiaceae Ms08]	0	78	15	244	15	157	5.23609e+07	5.50173e+07	4.10749e+07	5.71675e+07	5.07375e+07	4.97337e+07	4.40735e+07	5.14982e+07
High	MS08_v1_1582	ID:23317313 Integral membrane sensor signal transduction histidine kinase [Beijerinckiaceae Ms08]	0	42	16	161	16	494	1.20108e+07	1.06763e+07	2.25118e+06	6.77607e+06	7.45479e+06	5.00963e+06	7.06116e+06	5.82794e+06
High	MS08_v1_2213	ID:23317944 chvG| Sensor protein ChvG [Beijerinckiaceae Ms08]	0	47	28	133	28	611	9.31531e+06	9.19202e+06	4.77955e+06	8.19842e+06	1.35601e+06	989773	1.29369e+06	1.10267e+06
High	MS08_v1_0337	ID:23316068 protein of unknown function [Beijerinckiaceae Ms08]	0	82	12	191	12	194	1.65393e+07	1.685e+07	1.39405e+07	2.02173e+07	9.9493e+06	1.19781e+07	7.44566e+06	7.98068e+06
High	MS08_v1_1307	ID:23317038 AsmA family protein [Beijerinckiaceae Ms08]	0	39	19	100	19	637	8.52862e+06	9.15184e+06	4.45974e+06	7.74618e+06	547708	113096	58549.2
High	MS08_v1_2825	ID:23318556 gyaR| Glyoxylate reductase [Beijerinckiaceae Ms08]	0	57	17	194	17	331	1.05529e+07	1.04832e+07	5.37018e+06	1.22322e+07	1.16715e+07	1.30826e+07	1.48951e+07	1.39616e+07
High	MS08_v1_0315	ID:23316046 guaA| GMP synthetase (glutamine aminotransferase) [Beijerinckiaceae Ms08]	0	52	21	145	21	532	8.04039e+06	7.92144e+06	4.64057e+06	6.78432e+06	2.90044e+06	2.61506e+06	2.82022e+06	3.1545e+06
High	MS08_v1_2585	ID:23318316 DNA repair protein RecN [Beijerinckiaceae Ms08]	0	44	20	65	20	554	2.95662e+06	2.82382e+06	1.1669e+06	2.84655e+06	138742	178488	234653	267853
High	MS08_v1_0392	ID:23316123 protein of unknown function [Beijerinckiaceae Ms08]	0	69	11	136	11	212	2.25991e+07	2.02053e+07	1.94832e+07	2.43556e+07	619856	855643	138093	152068
High	MS08_v1_0783	ID:23316514 omp| Outer membrane lipoprotein Omp16 homolog [Beijerinckiaceae Ms08]	0	66	8	299	8	166	6.90701e+07	5.57265e+07	3.8621e+07	8.51586e+07	7.25156e+07	1.05388e+08	7.74819e+07	8.23951e+07
High	MS08_v1_0840	ID:23316571 conserved protein of unknown function [Beijerinckiaceae Ms08]	0	26	25	98	25	1201	5.34838e+06	5.62747e+06	2.27183e+06	5.37493e+06	219868	141862	157373	130172
High	MS08_v1_3458	ID:23319189 Penicillin-binding protein, 1A family [Beijerinckiaceae Ms08]	0	34	23	105	23	743	1.05599e+07	1.04786e+07	6.27672e+06	1.02726e+07	895716	1.13574e+06	1.72763e+06	1.02181e+06
High	MS08_v1_2367	ID:23318098 argB| Acetylglutamate kinase [Beijerinckiaceae Ms08]	0	67	15	124	15	298	1.06434e+07	1.15606e+07	8.27293e+06	8.23172e+06	3.47365e+06	4.87121e+06	7.37944e+06	4.13001e+06
High	MS08_v1_2824	ID:23318555 putative Cytochrome c, class I [Beijerinckiaceae Ms08]	0	27	15	204	15	678	1.67428e+07	1.69714e+07	7.33309e+06	1.55341e+07	1.15957e+07	8.06759e+06	1.17583e+07	9.36155e+06
High	MS08_v1_0050	ID:23315781 ispDF| Bifunctional enzyme IspD/IspF [Includes: 2-C-methyl-D-erythritol 4-phosphate cytidylyltransferase ; 2-C-methyl-D-erythritol 2,4-cyclodiphosphate synthase] [Beijerinckiaceae Ms08]	0	48	14	130	14	398	1.74843e+07	1.82731e+07	1.27713e+07	1.50525e+07	4.352e+06	4.88978e+06	4.28559e+06	4.42392e+06
High	MS08_v1_0306	ID:23316037 conserved protein of unknown function [Beijerinckiaceae Ms08]	0	54	13	211	13	247	3.63741e+07	3.34731e+07	2.0411e+07	3.70126e+07	1.60132e+07	1.78703e+07	1.4132e+07	1.9664e+07
High	MS08_v1_0794	ID:23316525 bdhA| D-beta-hydroxybutyrate dehydrogenase [Beijerinckiaceae Ms08]	0	54	10	138	10	261	2.41844e+07	2.54608e+07	1.89891e+07	2.33554e+07	8.11241e+06	8.45631e+06	8.24432e+06	8.67002e+06
High	MS08_v1_1802	ID:23317533 CRISPR-associated helicase, Cas3 family [Beijerinckiaceae Ms08]	0	41	30	186	30	740	3.8817e+06	4.29412e+06	3.09366e+06	4.95102e+06	9.10095e+06	9.12364e+06	1.01886e+07	9.56493e+06
High	MS08_v1_0682	ID:23316413 zwf| Glucose-6-phosphate 1-dehydrogenase 1 [Beijerinckiaceae Ms08]	0	58	23	238	22	462	4.95014e+06	5.47267e+06	2.70773e+06	6.48913e+06	2.15028e+07	2.25726e+07	2.03417e+07	2.61545e+07
High	MS08_v1_1594	ID:23317325 conserved exported protein of unknown function [Beijerinckiaceae Ms08]	0	44	10	94	10	303	1.56598e+07	1.43203e+07	8.64174e+06	1.30789e+07	1.03337e+07	7.66873e+06	5.69828e+06	7.16389e+06
High	MS08_v1_1929	ID:23317660 exported protein of unknown function [Beijerinckiaceae Ms08]	0	66	12	185	12	202	3.27534e+07	2.95578e+07	2.03285e+07	2.7462e+07	1.80554e+07	2.60521e+07	2.39926e+07	2.18364e+07
High	MS08_v1_2050	ID:23317781 conserved protein of unknown function [Beijerinckiaceae Ms08]	0	44	23	204	23	690	1.30565e+06	1.7224e+06	1.71333e+06	2.40969e+06	2.56727e+07	2.86221e+07	2.33205e+07	2.9714e+07
High	MS08_v1_0294	ID:23316025 Cold-shock DNA-binding domain protein [Beijerinckiaceae Ms08]	0	55	9	235	9	219	1.14912e+08	1.01335e+08	5.43399e+07	1.14045e+08	2.7061e+07	2.9106e+07	2.80248e+07	3.07949e+07
High	MS08_v1_0464	ID:23316195 rpsG| 30S ribosomal subunit protein S7 [Beijerinckiaceae Ms08]	0	62	11	237	11	156	6.5378e+07	6.10841e+07	4.08305e+07	7.04652e+07	2.03344e+07	2.78798e+07	2.62529e+07	2.7692e+07
High	MS08_v1_1090	ID:23316821 putative Heat shock protein-DnaJ-like protein [Beijerinckiaceae Ms08]	0	57	14	134	14	301	5.63934e+06	4.72657e+06	3.19982e+06	7.76023e+06	4.20744e+06	6.5085e+06	9.14633e+06	7.64993e+06
High	MS08_v1_0730	ID:23316461 GSH| Glutamate--cysteine ligase, chloroplastic [Beijerinckiaceae Ms08]	0	46	18	149	18	460	1.16458e+07	1.02602e+07	3.96538e+06	9.52909e+06	6.24042e+06	5.5417e+06	8.92453e+06	6.46372e+06
High	MS08_v1_0007	ID:23315738 opgG| Glucans biosynthesis protein G [Beijerinckiaceae Ms08]	0	43	16	136	16	522	5.75937e+06	5.59925e+06	1.43066e+06	3.81318e+06	1.14782e+07	1.18103e+07	1.50963e+07	1.18127e+07
High	MS08_v1_2265	ID:23317996 adc| putative acetoacetate decarboxylase 1 [Beijerinckiaceae Ms08]	0	61	13	217	13	250	1.91167e+07	1.95678e+07	2.16256e+07	2.15005e+07	1.80704e+07	2.54395e+07	3.40118e+07	3.04374e+07
High	MS08_v1_0305	ID:23316036 der| GTPase Der [Beijerinckiaceae Ms08]	0	47	21	143	21	467	7.00882e+06	7.35258e+06	2.60271e+06	6.53697e+06	8.3738e+06	7.51667e+06	5.45313e+06	6.9194e+06
High	MS08_v1_0472	ID:23316203 rplA| 50S ribosomal subunit protein L1 [Beijerinckiaceae Ms08]	0	65	12	231	12	231	6.58022e+07	6.3211e+07	4.34664e+07	5.77235e+07	2.01388e+07	3.25837e+07	2.65895e+07	2.68898e+07
High	MS08_v1_1004	ID:23316735 dapB| 4-hydroxy-tetrahydrodipicolinate reductase [Beijerinckiaceae Ms08]	0	52	13	194	13	270	1.40893e+07	1.25842e+07	9.59439e+06	1.33624e+07	2.48004e+07	2.60826e+07	3.02415e+07	2.99656e+07
High	MS08_v1_0778	ID:23316509 glmM| phosphoglucosamine mutase [Beijerinckiaceae Ms08]	0	46	20	107	20	449	1.10151e+07	1.20507e+07	9.15166e+06	1.30545e+07	2.02972e+06	2.17474e+06	2.12305e+06	2.32532e+06
High	MS08_v1_1673	ID:23317404 Dihydroorotase, multifunctional complex type [Beijerinckiaceae Ms08]	0	54	17	206	17	441	9.04708e+06	7.56588e+06	5.22265e+06	6.97842e+06	7.03056e+06	9.03537e+06	9.85227e+06	1.09645e+07
High	MS08_v1_1027	ID:23316758 Amylo-alpha-16-glucosidase [Beijerinckiaceae Ms08]	0	38	25	201	25	753	3.08032e+06	3.26222e+06	1.86758e+06	2.10359e+06	2.11711e+07	2.19076e+07	1.73662e+07	2.30571e+07
High	MS08_v1_1142	ID:23316873 putative acetyl-CoA acetyltransferase [Beijerinckiaceae Ms08]	0	48	14	173	14	396	3.77596e+06	4.3665e+06	3.2966e+06	6.34301e+06	1.72471e+07	2.08413e+07	2.56822e+07	2.15975e+07
High	MS08_v1_2215	ID:23317946 chvI| Transcriptional regulatory protein ChvI [Beijerinckiaceae Ms08]	0	58	11	153	11	231	2.67584e+07	2.68721e+07	2.08462e+07	2.7476e+07	9.48363e+06	1.08994e+07	1.09672e+07	9.40699e+06
High	MS08_v1_2508	ID:23318239 RNA polymerase sigma factor [Beijerinckiaceae Ms08]	0	56	9	99	9	211	1.00348e+07	8.83663e+06	8.19698e+06	1.17677e+07	2.92222e+06	3.99452e+06	3.23854e+06	3.05205e+06
High	MS08_v1_1487	ID:23317218 pyrC| Dihydroorotase [Beijerinckiaceae Ms08]	0	63	20	137	20	447	4.72713e+06	5.13775e+06	3.4688e+06	5.76264e+06	4.53924e+06	4.79748e+06	5.00229e+06	5.74027e+06
High	MS08_v1_2403	ID:23318134 ABC transporter related [Beijerinckiaceae Ms08]	0	63	18	105	18	327	8.50771e+07	7.99105e+07	1.99397e+09	7.29853e+07	1.89404e+08	1.89425e+08	2.45213e+08	3.38596e+08
High	MS08_v1_2863	ID:23318594 ftsH| ATP-dependent zinc metalloprotease FtsH [Beijerinckiaceae Ms08]	0	47	26	132	26	616	6.69981e+06	6.91509e+06	4.78331e+06	6.56947e+06	2.04206e+06	2.26799e+06	1.89201e+06	2.46124e+06
High	MS08_v1_1128	ID:23316859 trxB| thioredoxin reductase, FAD/NAD(P)-binding [Beijerinckiaceae Ms08]	0	52	10	75	10	326	1.26027e+07	1.0035e+07	5.50718e+06	7.63573e+06	699694	877140	1.23976e+06	731850
High	MS08_v1_1598	ID:23317329 moxG| Cytochrome c-L [Beijerinckiaceae Ms08]	0	56	11	279	11	217	1.55028e+08	1.55751e+08	1.74094e+08	2.65863e+08	8.4158e+07	9.54064e+07	6.44034e+07	8.31903e+07
High	MS08_v1_2869	ID:23318600 Glycogen debranching enzyme GlgX [Beijerinckiaceae Ms08]	0	27	29	166	29	1431	2.44613e+06	3.03648e+06	2.53842e+06	3.56285e+06	1.08529e+07	9.39205e+06	1.25662e+07	1.01705e+07
High	MS08_v1_1402	ID:23317133 Glycosyl transferase group 1 [Beijerinckiaceae Ms08]	0	58	18	105	18	396	4.56492e+06	5.59366e+06	1.9881e+06	5.40763e+06	1.51948e+06	1.11744e+06	1.44886e+06	1.28046e+06
High	MS08_v1_2467	ID:23318198 hom| Homoserine dehydrogenase [Beijerinckiaceae Ms08]	0	49	17	171	17	435	1.6748e+07	1.54649e+07	1.48143e+07	1.4908e+07	1.30459e+07	1.5089e+07	1.35099e+07	1.61086e+07
High	MS08_v1_3209	ID:23318940 fcl| bifunctional GDP-fucose synthetase: GDP-4-dehydro-6-deoxy-D-mannose epimerase and GDP-4-dehydro-6-L-deoxygalactose reductase [Beijerinckiaceae Ms08]	0	60	18	135	18	320	2.47206e+07	1.77555e+07	1.30121e+07	1.62469e+07	2.38429e+06	2.04233e+06	3.55847e+06	1.676e+06
High	MS08_v1_3263	ID:23318994 Protein-L-isoaspartate(D-aspartate) O-methyltransferase [Beijerinckiaceae Ms08]	0	55	11	132	11	243	2.79229e+07	2.87021e+07	1.8001e+07	2.47913e+07	8.53805e+06	7.24559e+06	9.73561e+06	8.61683e+06
High	MS08_v1_3127	ID:23318858 phoU| Phosphate-specific transport system accessory protein PhoU homolog [Beijerinckiaceae Ms08]	0	68	15	211	14	237	1.89079e+07	1.86772e+07	1.6437e+07	2.56005e+07	1.34303e+07	1.29067e+07	1.36213e+07	1.39851e+07
High	MS08_v1_2781	ID:23318512 NADH-quinone oxidoreductase, E subunit [Beijerinckiaceae Ms08]	0	53	12	101	12	314	1.20289e+07	1.36947e+07	8.62517e+06	2.32072e+07	4.89897e+06	5.42307e+06	5.73116e+06	3.79928e+06
High	MS08_v1_2930	ID:23318661 Patatin [Beijerinckiaceae Ms08]	0	61	19	154	19	377	8.63626e+06	9.95558e+06	3.48481e+06	7.39913e+06	4.91389e+06	4.41334e+06	5.29853e+06	4.30179e+06
High	MS08_v1_1855	ID:23317586 conserved protein of unknown function [Beijerinckiaceae Ms08]	0	49	18	205	18	355	8.14709e+06	9.01876e+06	6.30502e+06	9.99181e+06	1.93812e+07	1.83329e+07	2.18289e+07	1.94392e+07
High	MS08_v1_1144	ID:23316875 gpmA| 2,3-bisphosphoglycerate-dependent phosphoglycerate mutase [Beijerinckiaceae Ms08]	0	78	17	174	17	205	2.38862e+07	2.19156e+07	1.25847e+07	1.93962e+07	6.36039e+06	6.53799e+06	6.73876e+06	6.66059e+06
High	MS08_v1_3387	ID:23319118 protein of unknown function [Beijerinckiaceae Ms08]	0	54	10	151	10	288	1.25961e+07	1.29697e+07	1.28614e+07	1.15958e+07	4.35049e+07	3.40205e+07	3.21417e+07	3.13154e+07
High	MS08_v1_1911	ID:23317642 rpoH| RNA polymerase sigma factor RpoH [Beijerinckiaceae Ms08]	0	48	12	162	12	302	7.04294e+06	8.59097e+06	3.43527e+06	7.54084e+06	1.74733e+07	2.09366e+07	4.12666e+07	2.37866e+07
High	MS08_v1_1986	ID:23317717 rpsM| 30S ribosomal subunit protein S13 [Beijerinckiaceae Ms08]	0	69	13	203	13	122	4.8593e+07	3.99231e+07	3.67446e+07	4.99939e+07	2.01239e+07	2.21349e+07	2.04798e+07	2.07731e+07
High	MS08_v1_3223	ID:23318954 Capsular exopolysaccharide family [Beijerinckiaceae Ms08]	0	33	23	113	23	757	7.38967e+06	7.58788e+06	4.97199e+06	6.97996e+06	714916	655548	611000	623870
High	MS08_v1_1419	ID:23317150 Aldehyde oxidase and xanthine dehydrogenase molybdopterin binding [Beijerinckiaceae Ms08]	0	34	25	148	25	899	347613	469979	949798	4.03985e+06	1.21034e+07	1.3091e+07	1.18139e+07	1.28609e+07
High	MS08_v1_1030	ID:23316761 Glycosyl transferase group 1 [Beijerinckiaceae Ms08]	0	54	17	91	17	421	5.52203e+06	5.10869e+06	1.06685e+06	4.12194e+06	4.03301e+06	3.29152e+06	6.0123e+06	8.4244e+06
High	MS08_v1_0060	ID:23315791 Heparinase II/III family protein [Beijerinckiaceae Ms08]	0	52	24	173	24	565	6.59228e+06	6.10932e+06	2.68469e+06	5.73997e+06	3.79517e+06	3.62738e+06	4.26782e+06	3.20222e+06
High	MS08_v1_0584	ID:23316315 Electron transfer flavoprotein-ubiquinone oxidoreductase [Beijerinckiaceae Ms08]	0	44	19	129	19	559	9.53053e+06	1.06542e+07	7.73775e+06	1.1937e+07	4.17981e+06	4.57617e+06	2.78305e+06	3.9567e+06
High	MS08_v1_0658	ID:23316389 conserved protein of unknown function [Beijerinckiaceae Ms08]	0	54	17	94	17	414	1.05473e+07	1.03745e+07	7.63103e+06	1.04723e+07	1.49714e+06	1.3895e+06	1.52677e+06	1.10113e+06
High	MS08_v1_1574	ID:23317305 sbp| sulfate transporter subunit ; periplasmic-binding component of ABC superfamily [Beijerinckiaceae Ms08]	0	57	16	140	16	390	1.48581e+07	1.51614e+07	5.77185e+06	1.15462e+07	6.20622e+06	1.04181e+07	9.80552e+06	9.20504e+06
High	MS08_v1_0052	ID:23315783 ntrB| Nitrogen regulation protein NtrB [Beijerinckiaceae Ms08]	0	58	19	93	19	380	7.41506e+06	6.34369e+06	3.77718e+06	6.7678e+06	514543	902831	620200	648424
High	MS08_v1_2604	ID:23318335 cobS| Aerobic cobaltochelatase subunit CobS [Beijerinckiaceae Ms08]	0	53	15	171	15	333	1.53948e+07	1.46425e+07	9.61315e+06	1.42875e+07	2.90887e+06	2.79972e+06	4.33037e+06	2.81625e+06
High	MS08_v1_0395	ID:23316126 conserved membrane protein of unknown function [Beijerinckiaceae Ms08]	0	37	28	109	28	897	5.82532e+06	8.02812e+06	1.4695e+06	5.68333e+06	2.61988e+06	2.47813e+06	5.26739e+06	1.72323e+06
High	MS08_v1_1072	ID:23316803 conserved exported protein of unknown function [Beijerinckiaceae Ms08]	0	65	13	160	13	224	1.73623e+07	1.57929e+07	9.12545e+06	1.17852e+07	927700	978206	954825	563515
High	MS08_v1_2868	ID:23318599 pgm| Phosphoglucomutase [Beijerinckiaceae Ms08]	0	37	15	144	15	542	9.28758e+06	1.03243e+07	6.74242e+06	7.0086e+06	3.71816e+06	4.06503e+06	4.36335e+06	4.2211e+06
High	MS08_v1_0254	ID:23315985 Multi-sensor signal transduction histidine kinase [Beijerinckiaceae Ms08]	0	33	24	104	24	826	4.7785e+06	5.19366e+06	1.45511e+06	5.03379e+06	691941	579888	738480	122293
High	MS08_v1_1413	ID:23317144 conserved protein of unknown function [Beijerinckiaceae Ms08]	0	52	20	141	20	514	2.27735e+06	1.99043e+06	1.1413e+06	2.01123e+06	7.87395e+06	7.77032e+06	8.79707e+06	8.34222e+06
High	MS08_v1_0673	ID:23316404 Acid phosphatase [Beijerinckiaceae Ms08]	0	37	16	124	16	514	6.47839e+06	6.57186e+06	6.92759e+06	7.44309e+06	3.88843e+06	4.55757e+06	4.32012e+06	4.11455e+06
High	MS08_v1_1196	ID:23316927 putative zinc-type alcohol dehydrogenase [Beijerinckiaceae Ms08]	0	53	14	174	14	345	2.13077e+06	1.69846e+06	5.91973e+06	1.29807e+06	4.66196e+07	6.00289e+07	1.05882e+08	6.09009e+07
High	MS08_v1_2934	ID:23318665 MltA-interacting MipA family protein [Beijerinckiaceae Ms08]	0	38	7	199	7	277	5.27441e+07	4.90436e+07	2.26972e+07	4.85235e+07	1.18462e+07	4.89494e+07	9.65982e+07	4.9887e+07
High	MS08_v1_1411	ID:23317142 aroA| 3-phosphoshikimate 1-carboxyvinyltransferase [Beijerinckiaceae Ms08]	0	49	16	94	16	444	7.39743e+06	7.13858e+06	2.58556e+06	7.41502e+06	3.54427e+06	4.47331e+06	4.27245e+06	3.50686e+06
High	MS08_v1_2473	ID:23318204 Lytic murein transglycosylase [Beijerinckiaceae Ms08]	0	62	13	171	13	269	1.61042e+07	1.32326e+07	1.03712e+07	1.69232e+07	1.11478e+07	1.31865e+07	1.3885e+07	1.24988e+07
High	MS08_v1_3158	ID:23318889 Phosphate acetyltransferase [Beijerinckiaceae Ms08]	0	56	18	99	18	475	6.40114e+06	5.18874e+06	618645	4.47025e+06	1.30162e+06	1.4275e+06	1.14899e+06	1.31362e+06
High	MS08_v1_1205	ID:23316936 Cold-shock DNA-binding domain protein [Beijerinckiaceae Ms08]	0	72	12	188	12	188	1.7932e+07	1.7721e+07	1.1658e+07	1.94265e+07	2.28761e+07	2.2971e+07	3.04719e+07	2.42929e+07
High	MS08_v1_1717	ID:23317448 hss| Homospermidine synthase [Beijerinckiaceae Ms08]	0	35	14	121	14	476	2.11937e+07	2.10364e+07	1.3571e+07	1.98611e+07	1.69473e+06	1.74262e+06	1.64978e+06	1.86305e+06
High	MS08_v1_2277	ID:23318008 Efflux transporter, RND family, MFP subunit [Beijerinckiaceae Ms08]	0	38	16	159	16	418	2.48473e+07	2.31127e+07	9.78347e+06	1.9277e+07	8.82788e+06	6.93628e+06	9.87325e+06	6.39633e+06
High	MS08_v1_1640	ID:23317371 8-oxoguanine deaminase [Beijerinckiaceae Ms08]	0	48	17	170	17	471	1.7695e+06	1.77685e+06	2.95144e+06	2.80365e+06	1.37107e+07	1.54439e+07	1.87249e+07	2.23925e+07
High	MS08_v1_2611	ID:23318342 Import inner membrane translocase subunit Tim44 [Beijerinckiaceae Ms08]	0	47	10	124	10	317	8.43793e+06	8.29991e+06	5.4801e+06	6.5166e+06	1.35613e+07	1.30251e+07	1.98892e+07	1.18665e+07
High	MS08_v1_2055	ID:23317786 parB| Chromosome-partitioning protein ParB [Beijerinckiaceae Ms08]	0	53	13	124	13	299	1.22436e+07	1.0959e+07	7.56798e+06	1.31329e+07	966123	1.8924e+06	4.51694e+06	1.39424e+06
High	MS08_v1_2879	ID:23318610 Farnesyl diphosphate synthase [Beijerinckiaceae Ms08]	0	54	11	113	11	321	1.15674e+07	1.05517e+07	9.45231e+06	1.19163e+07	1.37474e+06	1.40815e+06	1.87702e+06	1.18961e+06
High	MS08_v1_1373	ID:23317104 Rhodanese domain protein [Beijerinckiaceae Ms08]	0	83	10	234	10	110	7.17648e+07	7.06966e+07	4.92482e+07	6.83885e+07	3.78646e+07	3.64475e+07	2.53743e+07	3.67304e+07
High	MS08_v1_0591	ID:23316322 RND family efflux transporter, MFP subunit [Beijerinckiaceae Ms08]	0	47	14	137	14	400	7.25022e+06	7.02541e+06	2.69001e+06	6.1725e+06	1.27552e+07	1.11809e+07	1.05287e+07	8.99691e+06
High	MS08_v1_3383	ID:23319114 PRC-barrel domain protein [Beijerinckiaceae Ms08]	0	63	13	262	13	264	5.20614e+07	4.9255e+07	2.94123e+07	6.02905e+07	2.12297e+07	1.95359e+07	2.47149e+07	2.5153e+07
High	MS08_v1_1367	ID:23317098 Peptidase M23 [Beijerinckiaceae Ms08]	0	53	20	86	20	462	5.47203e+06	5.00186e+06	2.04624e+07	5.32404e+06	5.34358e+06	4.45006e+06	6.30001e+06	8.79398e+06
High	MS08_v1_2438	ID:23318169 dfrA| putative dihydroflavonol-4-reductase [Beijerinckiaceae Ms08]	0	55	16	105	16	344	1.15432e+07	1.00165e+07	5.63963e+06	1.0656e+07	4.8256e+06	5.45915e+06	7.66135e+06	4.69905e+06
High	MS08_v1_2096	ID:23317827 Cobalamine synthase protein W [Beijerinckiaceae Ms08]	0	42	14	135	14	346	1.94647e+07	2.03259e+07	1.25401e+07	1.91307e+07	3.4336e+06	4.79657e+06	4.76294e+06	2.06652e+06
High	MS08_v1_0660	ID:23316391 UXS| UDP-glucuronic acid decarboxylase 6 [Beijerinckiaceae Ms08]	0	62	17	112	17	331	5.002e+06	5.28931e+06	5.98217e+06	7.74237e+06	2.34757e+06	2.19188e+06	2.10232e+06	3.47381e+06
High	MS08_v1_2377	ID:23318108 Signal peptide peptidase SppA, 36K type [Beijerinckiaceae Ms08]	0	54	13	153	13	323	1.63828e+07	1.5662e+07	9.26869e+06	1.30406e+07	1.88096e+07	1.70289e+07	2.72229e+07	1.6113e+07
High	MS08_v1_1457	ID:23317188 camA| Putidaredoxin reductase [Beijerinckiaceae Ms08]	0	47	18	121	18	420	1.47429e+07	1.47817e+07	5.44687e+06	8.67468e+06	725230	1.31701e+06	1.43972e+06	1.0011e+06
High	MS08_v1_2878	ID:23318609 conserved protein of unknown function [Beijerinckiaceae Ms08]	0	39	19	166	19	588	9.59335e+06	1.02537e+07	1.09033e+07	1.31699e+07	1.19194e+07	1.19794e+07	9.59791e+06	1.17936e+07
High	MS08_v1_0382	ID:23316113 purC| Phosphoribosylaminoimidazole-succinocarboxamide synthase A [Beijerinckiaceae Ms08]	0	58	15	189	15	264	2.64137e+07	2.44158e+07	1.80269e+07	2.45698e+07	1.9213e+07	2.1473e+07	1.93607e+07	2.30827e+07
High	MS08_v1_0119	ID:23315850 Organic solvent tolerance protein [Beijerinckiaceae Ms08]	0	21	18	178	18	919	7.53992e+06	6.99456e+06	2.29937e+06	6.83526e+06	5.59114e+06	6.57357e+06	8.83162e+06	5.41867e+06
High	MS08_v1_2414	ID:23318145 Efflux transporter, RND family, MFP subunit [Beijerinckiaceae Ms08]	0	43	16	110	16	452	9.8622e+06	8.24367e+06	2.63222e+06	5.58176e+06	3.16742e+06	2.67179e+06	3.73316e+06	2.22536e+06
High	MS08_v1_3382	ID:23319113 conserved protein of unknown function [Beijerinckiaceae Ms08]	0	50	21	157	21	557	1.19002e+06	1.18047e+06	403768	987830	2.7485e+07	2.7523e+07	2.57927e+07	2.80368e+07
High	MS08_v1_3135	ID:23318866 Signal transduction histidine kinase (fragment) [Beijerinckiaceae Ms08]	0	55	15	122	15	327	4.92309e+06	5.15519e+06	2.53975e+06	5.51659e+06	5.28413e+06	5.13466e+06	5.2144e+06	5.89984e+06
High	MS08_v1_1512	ID:23317243 frr| ribosome recycling factor [Beijerinckiaceae Ms08]	0	55	15	328	15	186	8.3595e+07	7.96336e+07	3.42176e+07	6.14199e+07	3.92321e+07	4.85492e+07	5.60736e+07	5.22739e+07
High	MS08_v1_2889	ID:23318620 putative glycosyltransferase group 1 family protein [Beijerinckiaceae Ms08]	0	47	15	120	15	390	9.40815e+06	1.01688e+07	6.06554e+06	7.38768e+06	6.992e+06	7.86067e+06	7.66521e+06	7.3044e+06
High	MS08_v1_1799	ID:23317530 CRISPR-associated protein, Csd2 family [Beijerinckiaceae Ms08]	0	51	19	201	19	318	1.07007e+07	1.01878e+07	9.95275e+06	1.7088e+07	8.05014e+06	1.30611e+07	2.34516e+07	1.15466e+07
High	MS08_v1_2317	ID:23318048 ABC transporter domain protein [Beijerinckiaceae Ms08]	0	34	18	130	18	626	7.614e+06	8.04714e+06	3.78373e+06	7.39355e+06	1.15042e+07	1.17132e+07	1.087e+07	1.13554e+07
High	MS08_v1_1638	ID:23317369 conserved protein of unknown function [Beijerinckiaceae Ms08]	0	90	7	176	7	113	8.35886e+06	7.50243e+06	5.63697e+06	7.0811e+06	7.03098e+07	1.07876e+08	1.01396e+08	8.32168e+07
High	MS08_v1_2616	ID:23318347 fabI| Enoyl-[acyl-carrier-protein] reductase [NADH] 2 [Beijerinckiaceae Ms08]	0	53	12	119	12	272	9.0594e+06	9.746e+06	4.92396e+06	8.72413e+06	2.24415e+06	1.9215e+06	3.64896e+06	1.71912e+06
High	MS08_v1_2425	ID:23318156 Carbonic anhydrase [Beijerinckiaceae Ms08]	0	59	12	163	12	246	1.08337e+07	8.24661e+06	6.37599e+06	1.07499e+07	4.91036e+06	4.35526e+06	5.78547e+06	5.88256e+06
High	MS08_v1_2250	ID:23317981 rplI| 50S ribosomal protein L9 [Beijerinckiaceae Ms08]	0	52	9	211	9	189	4.08098e+07	4.74949e+07	2.8916e+07	4.05867e+07	1.49065e+07	1.6947e+07	1.25212e+07	1.62093e+07
High	MS08_v1_0020	ID:23315751 atpF| ATP synthase subunit b 1 [Beijerinckiaceae Ms08]	0	57	12	166	12	160	3.93573e+07	2.53724e+07	2.13292e+07	3.82231e+07	9.26228e+06	1.05927e+07	1.00534e+07	8.74086e+06
High	MS08_v1_3414	ID:23319145 putative dTDP-4-dehydrorhamnose reductase [Beijerinckiaceae Ms08]	0	67	16	134	16	298	4.70667e+06	3.86206e+06	2.5839e+06	3.94481e+06	3.00879e+06	3.56339e+06	3.67765e+06	2.18903e+06
High	MS08_v1_2568	ID:23318299 Ribonuclease T2 [Beijerinckiaceae Ms08]	0	52	13	128	13	337	1.27908e+07	1.33302e+07	1.50599e+07	1.28762e+07	1.52261e+07	1.89168e+07	1.77803e+07	1.88382e+07
High	MS08_v1_2204	ID:23317935 glnK| regulatory protein, P-II 2, for nitrogen assimilation by glutamine synthetase, regulates GlnL (NRII) and GlnE (ATase) [Beijerinckiaceae Ms08]	0	87	10	248	10	112	1.24014e+08	1.28063e+08	1.26567e+08	1.35414e+08	1.28551e+08	1.09974e+08	1.15678e+08	1.23956e+08
High	MS08_v1_2493	ID:23318224 Metal dependent phosphohydrolase [Beijerinckiaceae Ms08]	0	46	19	145	19	431	5.4239e+06	6.1274e+06	3.95566e+06	6.34988e+06	8.06022e+06	7.90119e+06	7.48978e+06	9.89918e+06
High	MS08_v1_2594	ID:23318325 MscS Mechanosensitive ion channel [Beijerinckiaceae Ms08]	0	35	20	72	20	766	2.88765e+06	3.74071e+06	3.38028e+06	4.82173e+06	96121.5	140951	357757	463292
High	MS08_v1_1867	ID:23317598 atpH| ATP synthase subunit delta [Beijerinckiaceae Ms08]	0	62	11	163	11	187	4.11975e+07	3.02224e+07	2.76645e+07	4.04747e+07	6.22248e+06	6.36313e+06	7.56442e+06	6.60736e+06
High	MS08_v1_1734	ID:23317465 Polyhydroxyalkonate synthesis repressor, PhaR (modular protein) [Beijerinckiaceae Ms08]	0	43	13	192	13	272	1.57074e+07	1.67283e+07	1.62392e+07	1.71797e+07	9.88861e+06	9.67887e+06	8.84207e+06	1.06702e+07
High	MS08_v1_2664	ID:23318395 kdpB| potassium translocating ATPase, subunit B [Beijerinckiaceae Ms08]	0	35	21	138	21	710	4.79528e+06	5.15598e+06	2.04859e+06	5.35945e+06	8.26912e+06	7.70892e+06	1.15541e+07	6.39382e+06
High	MS08_v1_2413	ID:23318144 mdtB| multidrug transport protein (RND family) [Beijerinckiaceae Ms08]	0	27	20	57	20	1037	4.96263e+06	3.99582e+06	420649	2.8405e+06	1.82023e+06	1.36514e+06	2.07315e+06	1.06371e+06
High	MS08_v1_1579	ID:23317310 N-6 DNA methylase [Beijerinckiaceae Ms08]	0	30	20	116	20	618	1.19171e+07	1.09982e+07	9.91878e+06	1.11119e+07	1.50302e+06	2.76411e+06	1.31006e+06	1.38885e+06
High	MS08_v1_0460	ID:23316191 rplC| 50S ribosomal subunit protein L3 [Beijerinckiaceae Ms08]	0	53	13	182	13	241	4.60178e+07	4.49248e+07	3.20509e+07	3.42056e+07	1.2313e+07	2.44881e+07	1.77191e+07	1.94052e+07
High	MS08_v1_1817	ID:23317548 Alkyl hydroperoxide reductase subunit C [Beijerinckiaceae Ms08]	0	61	8	148	8	184	1.30049e+08	1.14451e+08	1.44755e+07	3.64772e+07	520841	1.82012e+06	7.01331e+06
High	MS08_v1_3353	ID:23319084 rpsI| 30S ribosomal subunit protein S9 [Beijerinckiaceae Ms08]	0	65	10	139	10	159	5.59989e+07	4.62602e+07	3.41568e+07	5.00354e+07	1.80447e+07	2.0333e+07	1.90288e+07	2.00279e+07
High	MS08_v1_0645	ID:23316376 conserved protein of unknown function [Beijerinckiaceae Ms08]	0	44	18	131	18	462	6.98587e+06	7.37578e+06	1.04675e+07	8.65627e+06	1.83345e+07	1.61314e+07	1.4549e+07	1.73079e+07
High	MS08_v1_2884	ID:23318615 conserved exported protein of unknown function [Beijerinckiaceae Ms08]	0	47	10	508	10	139	1.33661e+08	1.41825e+08	8.99848e+07	1.45835e+08	6.22933e+08	6.50321e+08	6.81839e+08	6.67915e+08
High	MS08_v1_0299	ID:23316030 dat| D-alanine aminotransferase [Beijerinckiaceae Ms08]	0	43	12	170	12	284	1.55231e+07	1.48063e+07	9.6267e+06	1.10595e+07	1.16622e+07	1.15165e+07	1.54304e+07	1.33919e+07
High	MS08_v1_0502	ID:23316233 trpE| Anthranilate synthase component 1 [Beijerinckiaceae Ms08]	0	44	18	112	18	505	5.46554e+06	4.5667e+06	2.2646e+06	3.89113e+06	3.33224e+06	3.2606e+06	3.14346e+06	3.5152e+06
High	MS08_v1_0040	ID:23315771 pdhA| Pyruvate dehydrogenase E1 component subunit alpha [Beijerinckiaceae Ms08]	0	51	14	182	14	344	1.10817e+07	1.15865e+07	8.41202e+06	1.20526e+07	1.3253e+07	2.17811e+07	2.745e+07	2.32364e+07
High	MS08_v1_1963	ID:23317694 tsaD| tRNA N6-adenosine threonylcarbamoyltransferase [Beijerinckiaceae Ms08]	0	55	14	145	14	352	1.44659e+07	1.33686e+07	7.72037e+06	1.33193e+07	7.43544e+06	6.84171e+06	7.14748e+06	7.80569e+06
High	MS08_v1_2173	ID:23317904 conserved protein of unknown function [Beijerinckiaceae Ms08]	0	56	9	116	9	166	1.53001e+07	1.55511e+07	8.67448e+06	1.52555e+07	1.72702e+06	3.1572e+06	3.1334e+06	2.43599e+06
High	MS08_v1_0154	ID:23315885 Dihydropteroate synthase [Beijerinckiaceae Ms08]	0	52	12	95	12	271	8.18429e+06	7.2244e+06	4.49137e+06	6.73092e+06	1.48033e+06	1.80787e+06	1.42726e+06	1.22352e+06
High	MS08_v1_2355	ID:23318086 Sulfite reductase [Beijerinckiaceae Ms08]	0	40	16	56	16	547	4.77583e+06	4.80068e+06	4.46939e+06	5.86702e+06	133152	140452	88930.3	91844.5
High	MS08_v1_2490	ID:23318221 DNA polymerase III, subunits gamma and tau [Beijerinckiaceae Ms08]	0	47	22	99	22	616	3.27823e+06	3.84624e+06	1.62978e+06	3.69421e+06	2.35942e+06	2.33887e+06	2.32645e+06	2.76096e+06
High	MS08_v1_1467	ID:23317198 Cyclic nucleotide-binding protein [Beijerinckiaceae Ms08]	0	54	10	193	10	229	1.93298e+07	1.95869e+07	1.31113e+07	2.15071e+07	2.59149e+07	2.79207e+07	2.54154e+07	2.49213e+07
High	MS08_v1_0096	ID:23315827 conserved protein of unknown function [Beijerinckiaceae Ms08]	0	88	8	116	8	112	3.14258e+07	2.52076e+07	1.76774e+07	1.41052e+07	1.62356e+06	2.15328e+06	6.77231e+06	851292
High	MS08_v1_2395	ID:23318126 protein of unknown function [Beijerinckiaceae Ms08]	0	48	18	90	18	515	7.31524e+06	7.22522e+06	7.70034e+06	8.66236e+06	387728	522619	226898
High	MS08_v1_0822	ID:23316553 DSBA oxidoreductase [Beijerinckiaceae Ms08]	0	57	11	132	11	230	3.45803e+07	3.19167e+07	1.55534e+07	2.45579e+07	1.18487e+07	1.24579e+07	1.18608e+07	1.16816e+07
High	MS08_v1_2008	ID:23317739 ErfK/YbiS/YcfS/YnhG family protein [Beijerinckiaceae Ms08]	0	65	12	131	12	201	1.65345e+07	1.71816e+07	2.69628e+07	2.26656e+07	1.98703e+06	4.97093e+06	4.52733e+06	1.94271e+06
High	MS08_v1_0656	ID:23316387 Putative periplasmic ligand-binding sensor protein (fragment) [Beijerinckiaceae Ms08]	0	56	7	244	7	158	5.0723e+07	3.96173e+07	3.20353e+07	4.82652e+07	1.57323e+08	1.73056e+08	2.11381e+08	2.00473e+08
High	MS08_v1_2009	ID:23317740 conserved exported protein of unknown function [Beijerinckiaceae Ms08]	0	38	16	87	16	424	1.09845e+07	1.031e+07	1.28057e+07	1.25521e+07	5.41575e+06	4.93208e+06	6.73268e+06	6.97714e+06
High	MS08_v1_1355	ID:23317086 leuC| 3-isopropylmalate isomerase subunit, dehydratase component [Beijerinckiaceae Ms08]	0	44	16	178	16	468	4.43982e+06	5.33914e+06	6.0578e+06	1.02763e+07	7.76955e+06	1.04346e+07	1.14795e+07	9.98556e+06
High	MS08_v1_3443	ID:23319174 conserved protein of unknown function [Beijerinckiaceae Ms08]	0	54	13	133	13	356	2.07244e+07	2.05965e+07	1.7018e+07	2.15129e+07	1.79508e+07	1.81471e+07	1.7898e+07	1.77862e+07
High	MS08_v1_2301	ID:23318032 glcG| Protein GlcG [Beijerinckiaceae Ms08]	0	72	6	136	6	135	1.89193e+07	1.93212e+07	1.46296e+07	1.6133e+07	1.47283e+07	1.63683e+07	2.16251e+07	1.46701e+07
High	MS08_v1_3415	ID:23319146 rmlB| dTDP-D-glucose-4,6-dehydratase [Beijerinckiaceae Ms08]	0	55	16	137	16	353	6.64179e+06	6.98746e+06	3.40937e+06	7.14206e+06	6.05814e+06	7.21208e+06	1.03125e+07	7.4287e+06
High	MS08_v1_1501	ID:23317232 qor| Quinone oxidoreductase [Beijerinckiaceae Ms08]	0	46	11	215	11	324	1.81597e+07	1.6732e+07	1.54799e+07	1.5464e+07	2.49301e+07	3.04578e+07	3.28498e+07	3.09586e+07
High	MS08_v1_0505	ID:23316236 trpD| Anthranilate phosphoribosyltransferase [Beijerinckiaceae Ms08]	0	50	13	100	13	359	4.80996e+06	5.17484e+06	2.29125e+06	4.40655e+06	1.90335e+06	2.39872e+06	2.78948e+06	2.72388e+06
High	MS08_v1_2779	ID:23318510 nuoC| NADH-quinone oxidoreductase subunit C [Beijerinckiaceae Ms08]	0	50	10	95	10	204	1.28379e+07	1.1387e+07	7.51472e+06	1.34499e+07	4.33281e+06	4.89241e+06	4.95336e+06	4.31694e+06
High	MS08_v1_2584	ID:23318315 bamD| Outer membrane protein assembly factor BamD [Beijerinckiaceae Ms08]	0	40	10	198	10	301	5.14942e+07	4.77767e+07	3.20232e+07	5.1335e+07	2.68804e+07	2.77862e+07	2.82672e+07	2.60758e+07
High	MS08_v1_1474	ID:23317205 Signal peptidase I [Beijerinckiaceae Ms08]	0	46	13	153	13	312	2.88629e+07	2.95108e+07	1.70207e+07	3.14297e+07	9.48955e+06	9.07978e+06	1.27884e+07	8.39125e+06
High	MS08_v1_1357	ID:23317088 rplS| 50S ribosomal protein L19 [Beijerinckiaceae Ms08]	0	56	8	209	8	148	4.10692e+07	3.31303e+07	3.41459e+07	3.6224e+07	1.24622e+07	1.69648e+07	1.28441e+07	1.64119e+07
High	MS08_v1_3163	ID:23318894 UspA [Beijerinckiaceae Ms08]	0	58	12	123	12	269	5.34265e+06	4.15218e+06	4.58038e+06	7.12153e+06	5.28645e+06	6.00191e+06	5.38682e+06	7.13542e+06
High	MS08_v1_0827	ID:23316558 sufB| component of SufBCD complex [Beijerinckiaceae Ms08]	0	57	22	108	22	490	8.90828e+06	8.41748e+06	5.02938e+06	7.402e+06	4.85963e+06	8.62878e+06	1.34069e+07	1.0654e+07
High	MS08_v1_1826	ID:23317557 purM| phosphoribosylaminoimidazole synthetase [Beijerinckiaceae Ms08]	0	47	13	61	13	361	7.48538e+06	6.48349e+06	2.98656e+06	5.33819e+06	1.88736e+06	1.52439e+06	1.2835e+06	1.72148e+06
High	MS08_v1_2225	ID:23317956 rnd| Ribonuclease D [Beijerinckiaceae Ms08]	0	42	14	103	14	392	7.69142e+06	7.76135e+06	5.38068e+06	7.2386e+06	2.29664e+06	2.23999e+06	1.72482e+06	2.69833e+06
High	MS08_v1_0491	ID:23316222 conserved exported protein of unknown function [Beijerinckiaceae Ms08]	0	61	10	124	10	155	3.22552e+07	2.9558e+07	1.48338e+07	2.30704e+07	9.62015e+06	1.02292e+07	9.80726e+06	9.73915e+06
High	MS08_v1_1137	ID:23316868 Cytochrome c1 [Beijerinckiaceae Ms08]	0	42	11	134	11	299	7.15643e+06	8.13155e+06	5.37834e+06	1.12261e+07	3.68183e+06	4.12936e+06	7.10541e+06	3.40485e+06
High	MS08_v1_0091	ID:23315822 Glutathione S-transferase domain [Beijerinckiaceae Ms08]	0	52	9	104	9	217	1.36994e+07	1.52368e+07	6.72048e+06	1.17129e+07	2.67537e+06	4.44791e+06	5.09073e+06	3.82902e+06
High	MS08_v1_0556	ID:23316287 plsX| fatty acid/phospholipid synthesis protein [Beijerinckiaceae Ms08]	0	50	14	98	14	361	2.25871e+07	2.391e+07	1.40799e+07	1.83142e+07	4.82272e+06	5.60266e+06	5.6326e+06	4.68438e+06
High	MS08_v1_2228	ID:23317959 ppk| Polyphosphate kinase [Beijerinckiaceae Ms08]	0	30	21	109	21	794	5.13647e+06	5.15785e+06	3.21525e+06	5.33752e+06	2.99541e+06	2.32326e+06	2.40747e+06	2.65163e+06
High	MS08_v1_1147	ID:23316878 Extracellular metalloprotease (modular protein) [Beijerinckiaceae Ms08]	0	52	19	206	19	431	3.55274e+06	3.41533e+06	6.09874e+06	5.62421e+06	2.28819e+07	2.49795e+07	2.86107e+07	2.76119e+07
High	MS08_v1_2506	ID:23318237 uppP| Undecaprenyl-diphosphatase 2 [Beijerinckiaceae Ms08]	0	35	8	71	8	291	1.04598e+07	8.52195e+06	5.24244e+06	6.69934e+06	1.42643e+06	855002	1.20182e+06	721973
High	MS08_v1_0446	ID:23316177 rpsH| 30S ribosomal subunit protein S8 [Beijerinckiaceae Ms08]	0	80	11	201	11	132	4.73383e+07	5.42895e+07	4.90604e+07	7.32512e+07	2.8037e+07	3.11319e+07	2.44857e+07	3.06844e+07
High	MS08_v1_0440	ID:23316171 secY| preprotein translocase membrane subunit [Beijerinckiaceae Ms08]	0	25	10	117	10	444	2.43607e+07	2.26032e+07	1.1238e+07	1.85458e+07	8.93264e+06	8.59603e+06	7.38396e+06	6.90035e+06
High	MS08_v1_0110	ID:23315841 conserved protein of unknown function [Beijerinckiaceae Ms08]	0	53	11	116	11	247	1.79336e+07	1.5022e+07	1.00508e+07	1.72079e+07	5.90659e+06	4.53503e+06	7.56206e+06	7.20953e+06
High	MS08_v1_1678	ID:23317409 putative Glucan endo-1,3-beta-D-glucosidase [Beijerinckiaceae Ms08]	0	41	11	134	11	328	3.98335e+07	4.29487e+07	7.21455e+07	4.83827e+07	7.84782e+06	9.29244e+06	9.19362e+06	1.10525e+07
High	MS08_v1_1436	ID:23317167 ALDH7B| Aldehyde dehydrogenase family 7 member B4 [Beijerinckiaceae Ms08]	0	45	20	144	20	513	2.96869e+06	3.28419e+06	2.26437e+06	3.22588e+06	6.9325e+06	6.31531e+06	7.75176e+06	7.32837e+06
High	MS08_v1_1916	ID:23317647 conserved exported protein of unknown function [Beijerinckiaceae Ms08]	0	47	8	127	8	197	3.16705e+07	2.35911e+07	1.49541e+07	2.39817e+07	1.76791e+07	1.85353e+07	2.77491e+07	1.87634e+07
High	MS08_v1_2511	ID:23318242 phyR| Phyllosphere-induced regulator PhyR [Beijerinckiaceae Ms08]	0	49	10	214	10	272	6.01866e+07	5.99459e+07	4.58774e+07	6.31604e+07	4.77858e+07	4.63387e+07	6.94206e+07	4.9734e+07
High	MS08_v1_1746	ID:23317477 obgE| GTPase involved in cell partioning and DNA repair [Beijerinckiaceae Ms08]	0	52	11	50	11	345	1.63061e+06	2.35249e+06	3.08557e+06	1.51024e+06	931545	1.89523e+06	1.06896e+06	1.60172e+06
High	MS08_v1_0178	ID:23315909 conserved protein of unknown function [Beijerinckiaceae Ms08]	0	54	16	93	16	338	5.09562e+06	4.82057e+06	2.42315e+06	4.32002e+06	3.24834e+06	3.3367e+06	3.31069e+06	2.36758e+06
High	MS08_v1_1429	ID:23317160 Beta-lactamase [Beijerinckiaceae Ms08]	0	47	19	155	19	530	6.08261e+06	6.54659e+06	5.22635e+06	7.74673e+06	8.76443e+06	9.44777e+06	1.38129e+07	1.05543e+07
High	MS08_v1_1398	ID:23317129 putative aldo/keto reductase [Beijerinckiaceae Ms08]	0	42	11	135	11	320	9.9091e+06	8.21095e+06	5.6219e+06	6.03774e+06	1.26832e+07	1.09595e+07	1.06656e+07	1.07264e+07
High	MS08_v1_0043	ID:23315774 lpdA| Dihydrolipoyl dehydrogenase [Beijerinckiaceae Ms08]	0	54	21	110	21	480	127029	155387	269328	715118	1.40146e+07	1.67627e+07	1.49477e+07	1.6327e+07
High	MS08_v1_0671	ID:23316402 conserved exported protein of unknown function [Beijerinckiaceae Ms08]	0	35	7	170	7	199	2.2101e+07	1.7362e+07	8.60908e+06	1.05039e+07	4.65492e+07	5.39628e+07	7.19119e+07	4.37279e+07
High	MS08_v1_1158	ID:23316889 Protein-export protein SecB (modular protein) [Beijerinckiaceae Ms08]	0	50	10	154	10	216	6.19717e+07	6.48664e+07	4.73102e+07	67544714	1.97342e+07	1.9362e+07	2.22318e+07	2.50254e+07
High	MS08_v1_2227	ID:23317958 Ppx/GppA phosphatase [Beijerinckiaceae Ms08]	0	45	18	98	18	528	3.23437e+06	3.04405e+06	1.28645e+06	3.25689e+06	5.09866e+06	4.60379e+06	5.42368e+06	5.54964e+06
High	MS08_v1_3365	ID:23319096 Adenylate/guanylate cyclase [Beijerinckiaceae Ms08]	0	68	19	63	19	383	2.56947e+06	2.52341e+06	1.08729e+06	1.9064e+06	734402	819271	912124	590120
High	MS08_v1_2243	ID:23317974 fabD| malonyl-CoA-[acyl-carrier-protein] transacylase [Beijerinckiaceae Ms08]	0	37	9	143	9	317	1.90254e+07	2.00997e+07	3.81489e+07	1.69418e+07	6.81455e+06	9.44284e+06	1.10855e+07	1.09426e+07
High	MS08_v1_2813	ID:23318544 NAD-dependent epimerase/dehydratase [Beijerinckiaceae Ms08]	0	55	15	131	15	291	1.1105e+07	9.82494e+06	3.20293e+06	9.39146e+06	6.38603e+06	5.73107e+06	6.02943e+06	5.94123e+06
High	MS08_v1_0422	ID:23316153 Beta-lactamase domain protein [Beijerinckiaceae Ms08]	0	61	11	176	11	247	1.33706e+07	1.4624e+07	7.5681e+06	8.6919e+06	5.22934e+06	7.23185e+06	8.3282e+06	6.95181e+06
High	MS08_v1_1481	ID:23317212 Glycosyl transferase group 1 [Beijerinckiaceae Ms08]	0	52	19	89	19	381	6.97615e+06	6.87638e+06	2.23323e+06	5.14946e+06	1.4016e+06	1.53866e+06	1.69177e+06	1.10167e+06
High	MS08_v1_1513	ID:23317244 pyrH| uridylate kinase [Beijerinckiaceae Ms08]	0	63	12	88	12	243	2.07216e+07	2.00936e+07	7.53305e+06	9.77633e+06	3.87846e+06	4.76214e+06	6.07205e+06	5.05191e+06
High	MS08_v1_0887	ID:23316618 ErfK/YbiS/YcfS/YnhG family protein [Beijerinckiaceae Ms08]	0	51	12	94	10	321	1.52408e+07	1.33953e+07	1.14904e+07	2.77405e+07	8.56578e+06	1.182e+07	6.36942e+06	9.36058e+06
High	MS08_v1_1314	ID:23317045 conserved protein of unknown function [Beijerinckiaceae Ms08]	0	64	14	232	14	236	3.92349e+07	3.98949e+07	2.73685e+07	4.18394e+07	1.76138e+07	2.31292e+07	3.06532e+07	2.29896e+07
High	MS08_v1_0194	ID:23315925 aroC| chorismate synthase [Beijerinckiaceae Ms08]	0	51	14	148	14	377	1.02737e+07	8.18493e+06	5.05459e+06	9.91519e+06	1.55253e+07	2.09832e+07	1.59216e+07	1.70702e+07
High	MS08_v1_0506	ID:23316237 trpC| Indole-3-glycerol phosphate synthase [Beijerinckiaceae Ms08]	0	55	14	219	14	273	1.00438e+07	9.60314e+06	1.01946e+07	1.26543e+07	1.6446e+07	2.12715e+07	2.04758e+07	2.21786e+07
High	MS08_v1_1381	ID:23317112 ribF| Riboflavin biosynthesis protein RibF [Includes: Riboflavin kinase ; FMN adenylyltransferase] [Beijerinckiaceae Ms08]	0	59	16	65	16	343	4.48313e+06	4.72413e+06	2.36871e+06	3.6871e+06	903627	848167	535998	740586
High	MS08_v1_2082	ID:23317813 ilvE| putative branched-chain-amino-acid aminotransferase [Beijerinckiaceae Ms08]	0	47	13	156	13	295	7.35642e+06	7.39434e+06	8.34885e+06	9.18376e+06	1.04329e+07	1.34683e+07	1.18325e+07	1.55812e+07
High	MS08_v1_2817	ID:23318548 gshB| Glutathione synthetase [Beijerinckiaceae Ms08]	0	51	16	128	16	346	8.00151e+06	7.56817e+06	5.82145e+06	7.63416e+06	2.59666e+06	3.09023e+06	2.43233e+06	1.82172e+06
High	MS08_v1_0789	ID:23316520 gpsA| Glycerol-3-phosphate dehydrogenase [NAD(P)+] [Beijerinckiaceae Ms08]	0	48	13	188	13	341	9.02427e+06	8.10445e+06	6.5837e+06	7.81156e+06	3.06051e+07	3.44831e+07	3.18888e+07	4.08388e+07
High	MS08_v1_0635	ID:23316366 Glycosyl transferase group 1 [Beijerinckiaceae Ms08]	0	51	17	96	17	428	3.11248e+06	2.77181e+06	1.0218e+06	2.42162e+06	1.73994e+06	1.72579e+06	1.92733e+06	1.89333e+06
High	MS08_v1_3164	ID:23318895 conserved protein of unknown function [Beijerinckiaceae Ms08]	0	87	10	94	10	137	1.08145e+07	1.3882e+07	1.05815e+07	1.76713e+07	2.12255e+06	1.64088e+06	1.24844e+06	1.59689e+06
High	MS08_v1_1062	ID:23316793 ispH| 1-hydroxy-2-methyl-2-(E)-butenyl 4-diphosphate reductase, 4Fe-4S protein [Beijerinckiaceae Ms08]	0	50	13	75	12	318	3.73778e+06	3.93639e+06	4.60167e+06	7.07489e+06	239545	388059	209767	195847
High	MS08_v1_0443	ID:23316174 rpsE| 30S ribosomal subunit protein S5 [Beijerinckiaceae Ms08]	0	51	10	239	10	189	6.67825e+07	6.23387e+07	4.53485e+07	6.62296e+07	3.32287e+07	3.61578e+07	2.93246e+07	3.23144e+07
High	MS08_v1_0577	ID:23316308 Nitroreductase [Beijerinckiaceae Ms08]	0	55	8	94	8	187	1.45482e+07	1.61771e+07	7.64549e+06	1.29996e+07	521943	858058	1.06513e+06	843884
High	MS08_v1_2439	ID:23318170 conserved protein of unknown function [Beijerinckiaceae Ms08]	0	51	13	102	13	292	9.15846e+06	8.78625e+06	5.49366e+06	6.70955e+06	1.39293e+06	1.33133e+06	2.7552e+06	1.46102e+06
High	MS08_v1_0191	ID:23315922 Lytic transglycosylase catalytic [Beijerinckiaceae Ms08]	0	37	23	72	23	723	1.97895e+06	2.46004e+06	1.08408e+06	2.28296e+06	520846	1.15971e+06	2.0698e+06	277347
High	MS08_v1_2402	ID:23318133 Lipopolysaccharide transport periplasmic protein LptA [Beijerinckiaceae Ms08]	0	62	11	60	11	196	1.37879e+07	1.2786e+07	6.50929e+06	1.0382e+07	107069	302239	138465	70213.8
High	MS08_v1_2838	ID:23318569 dihydrolipoyltranssuccinase (fragment) [Beijerinckiaceae Ms08]	0	48	14	182	14	297	1.73982e+07	1.5855e+07	1.01758e+07	1.62481e+07	1.80364e+07	1.98618e+07	2.80698e+07	2.00637e+07
High	MS08_v1_2815	ID:23318546 dcp| Peptidyl-dipeptidase dcp [Beijerinckiaceae Ms08]	0	35	22	142	22	691	2.97948e+06	3.10379e+06	2.19254e+06	5.42758e+06	5.65319e+06	4.19151e+06	3.24426e+06	5.21293e+06
High	MS08_v1_3161	ID:23318892 Aminoglycoside phosphotransferase [Beijerinckiaceae Ms08]	0	41	18	97	18	516	5.78254e+06	3.93954e+06	6.58254e+06	3.31378e+06	2.64992e+06	2.72979e+06	2.15829e+06	3.01477e+06
High	MS08_v1_1396	ID:23317127 ndh| NADH dehydrogenase [Beijerinckiaceae Ms08]	0	36	15	145	15	460	9.78782e+06	9.94476e+06	8.56889e+06	1.09517e+07	1.29385e+07	1.15924e+07	1.7408e+07	1.06231e+07
High	MS08_v1_2434	ID:23318165 Signal recognition particle receptor FtsY (fragment) [Beijerinckiaceae Ms08]	0	49	16	107	16	367	8.42441e+06	7.37297e+06	1.79819e+06	6.62874e+06	650932	2.20208e+06	1.24067e+06	962029
High	MS08_v1_0632	ID:23316363 conserved protein of unknown function [Beijerinckiaceae Ms08]	0	38	9	85	9	321	4.34694e+06	4.81713e+06	7.52046e+06	9.17013e+06	6.04414e+06	4.7267e+06	3.35325e+06	4.58971e+06
High	MS08_v1_1991	ID:23317722 rarA| Replication-associated recombination protein A [Beijerinckiaceae Ms08]	0	49	15	84	15	437	4.14866e+06	4.04889e+06	3.69916e+06	4.04915e+06	3.27646e+06	3.56202e+06	3.5108e+06	4.32033e+06
High	MS08_v1_2876	ID:23318607 Peptidase S9 prolyl oligopeptidase active site domain protein [Beijerinckiaceae Ms08]	0	46	25	100	25	656	1.97869e+06	1.9079e+06	1.18659e+06	2.86293e+06	2.10986e+06	2.39963e+06	1.49981e+06	2.16058e+06
High	MS08_v1_1343	ID:23317074 FHA domain containing protein [Beijerinckiaceae Ms08]	0	54	16	67	16	399	4.78436e+06	5.18105e+06	3.61387e+06	4.93812e+06	60846.5	96888.3	82160.1
High	MS08_v1_1567	ID:23317298 mutS| DNA mismatch repair protein MutS [Beijerinckiaceae Ms08]	0	31	26	97	26	916	2.98825e+06	3.29019e+06	1.65874e+06	3.95213e+06	427393	315288	396738	241869
High	MS08_v1_0490	ID:23316221 conserved exported protein of unknown function [Beijerinckiaceae Ms08]	0	30	12	200	12	548	1.0413e+07	7.04954e+06	9.09667e+06	9.21621e+06	5.91963e+06	6.89729e+06	1.52388e+07	9.07096e+06
High	MS08_v1_1852	ID:23317583 prkB| phosphoribulokinase [Beijerinckiaceae Ms08]	0	58	15	98	15	291	3.70727e+06	4.45404e+06	1.77686e+06	4.80988e+06	2.28816e+06	2.80232e+06	2.05884e+06	2.38227e+06
High	MS08_v1_0215	ID:23315946 hypF| Carbamoyltransferase HypF [Beijerinckiaceae Ms08]	0	49	28	76	28	804	464352	100639	73206.8	1.16633e+06	7.57552e+06	8.41762e+06	7.70443e+06	9.59486e+06
High	MS08_v1_2472	ID:23318203 Glycoside hydrolase 15-related [Beijerinckiaceae Ms08]	0	30	14	70	14	648	3.90219e+06	3.49568e+06	2.20465e+06	2.69609e+06	894075	1.05315e+06	1.2575e+06	494882
High	MS08_v1_0652	ID:23316383 hisG| ATP phosphoribosyltransferase [Beijerinckiaceae Ms08]	0	43	14	169	14	328	6.2642e+06	6.28886e+06	4.89268e+06	5.35732e+06	4.01977e+06	3.93698e+06	3.08259e+06	4.48336e+06
High	MS08_v1_0826	ID:23316557 sufC| component of SufBCD complex, ATP-binding component of ABC superfamily [Beijerinckiaceae Ms08]	0	47	13	154	13	251	1.63451e+07	1.60541e+07	4.92795e+06	1.22877e+07	1.11584e+07	1.21954e+07	2.06384e+07	1.26494e+07
High	MS08_v1_3289	ID:23319020 conserved exported protein of unknown function [Beijerinckiaceae Ms08]	0	50	11	166	11	208	1.63699e+07	1.5038e+07	1.10139e+07	1.88049e+07	2.94644e+07	2.42719e+07	3.42839e+07	2.48155e+07
High	MS08_v1_1880	ID:23317611 Outer membrane lipoprotein carrier protein LolA [Beijerinckiaceae Ms08]	0	55	10	109	10	266	2.57951e+07	2.39481e+07	1.63514e+07	1.98682e+07	1.28172e+06	1.91128e+06	1.96718e+06	2.0557e+06
High	MS08_v1_1477	ID:23317208 conserved protein of unknown function [Beijerinckiaceae Ms08]	0	68	16	107	16	294	3.17214e+06	2.65537e+06	701605	2.5488e+06	2.83278e+06	3.09051e+06	3.66142e+06	2.55353e+06
High	MS08_v1_1200	ID:23316931 conserved protein of unknown function [Beijerinckiaceae Ms08]	0	37	12	138	12	393	5.25071e+06	5.55194e+06	2.89241e+06	4.35935e+06	1.75654e+07	1.62583e+07	2.17168e+07	1.85373e+07
High	MS08_v1_0611	ID:23316342 rlp| Ribulose bisphosphate carboxylase-like protein 1 [Beijerinckiaceae Ms08]	0	56	13	74	13	367	3.6603e+06	2.59462e+06	2.35366e+06	3.85518e+06	847623	1.32868e+06	966151	1.25818e+06
High	MS08_v1_2242	ID:23317973 fabG| 3-oxoacyl-[acyl-carrier-protein] reductase [Beijerinckiaceae Ms08]	0	54	9	99	9	245	1.83292e+07	2.84844e+07	1.63754e+07	2.26199e+07	9.83997e+06	1.43894e+07	1.82858e+07	1.46531e+07
High	MS08_v1_2145	ID:23317876 Prephenate dehydratase [Beijerinckiaceae Ms08]	0	41	9	77	9	287	1.10425e+07	9.25817e+06	6.21685e+06	1.07221e+07	5.40795e+06	5.80696e+06	5.11106e+06	5.30444e+06
High	MS08_v1_3409	ID:23319140 atoD| acetoacetyl-CoA transferase, alpha subunit [Beijerinckiaceae Ms08]	0	71	11	77	11	235	1.38468e+07	1.15435e+07	9.26873e+06	9.14085e+06	3.92768e+06	4.70688e+06	6.59648e+06	5.95288e+06
High	MS08_v1_2033	ID:23317764 coaA| pantothenate kinase [Beijerinckiaceae Ms08]	0	48	14	83	14	318	6.32622e+06	5.73793e+06	3.12124e+06	5.07478e+06	1.19292e+06	628828	552337	641820
High	MS08_v1_1989	ID:23317720 rplQ| 50S ribosomal subunit protein L17 [Beijerinckiaceae Ms08]	0	56	11	146	11	139	4.63866e+07	3.79244e+07	4.18415e+07	5.26706e+07	1.79298e+07	2.28209e+07	1.44469e+07	2.13212e+07
High	MS08_v1_1819	ID:23317550 oxyR| Hydrogen peroxide-inducible genes activator [Beijerinckiaceae Ms08]	0	47	11	68	11	326	7.43056e+06	6.54494e+06	3.06275e+06	5.85894e+06
High	MS08_v1_1353	ID:23317084 glbN| Group 1 truncated hemoglobin GlbN [Beijerinckiaceae Ms08]	0	66	5	124	5	121	1.26891e+07	1.00469e+07	6.56555e+06	6.54299e+06	6.19528e+06	8.53107e+06	7.98774e+06	9.04603e+06
High	MS08_v1_0075	ID:23315806 trxA| thioredoxin 1 [Beijerinckiaceae Ms08]	0	75	6	127	6	106	5.12586e+07	5.08102e+07	3.48015e+07	4.91579e+07	7.19954e+07	7.83345e+07	8.46764e+07	6.95279e+07
High	MS08_v1_1925	ID:23317656 Metallophosphoesterase [Beijerinckiaceae Ms08]	0	55	12	75	12	296	4.40792e+06	4.61751e+06	1.34965e+06	3.57665e+06	1.14687e+06	1.68527e+06	383269	1.58798e+06
High	MS08_v1_0332	ID:23316063 conserved protein of unknown function [Beijerinckiaceae Ms08]	0	54	6	190	6	166	3.42795e+07	3.49877e+07	3.59116e+07	3.57773e+07	9.08742e+07	1.06276e+08	1.43757e+08	1.17048e+08
High	MS08_v1_3413	ID:23319144 rmlA| dTDP-glucose pyrophosphorylase (glucose-1-phosphate thymidylyltransferase) [Beijerinckiaceae Ms08]	0	49	12	103	12	294	9.15686e+06	8.52979e+06	7.20625e+06	8.5403e+06	1.83069e+06	3.21653e+06	2.85771e+06	2.05769e+06
High	MS08_v1_1048	ID:23316779 Phasin family protein [Beijerinckiaceae Ms08]	0	87	12	119	12	144	9.57553e+06	9.57807e+06	5.40549e+06	6.42965e+06	1.23436e+07	1.46194e+07	3.8264e+07	1.51586e+07
High	MS08_v1_3391	ID:23319122 putative Universal stress protein UspA-like protein [Beijerinckiaceae Ms08]	0	49	10	138	10	281	1.17796e+07	1.03632e+07	4.12198e+06	8.42896e+06	2.25241e+07	2.93066e+07	2.90889e+07	2.98958e+07
High	MS08_v1_3351	ID:23319082 argC| N-acetyl-gamma-glutamyl-phosphate reductase [Beijerinckiaceae Ms08]	0	58	15	167	15	303	6.47947e+06	5.66716e+06	2.926e+06	6.41252e+06	1.23217e+07	1.31394e+07	1.77009e+07	1.62287e+07
High	MS08_v1_0165	ID:23315896 Dihydroneopterin aldolase [Beijerinckiaceae Ms08]	0	44	14	63	14	392	4.89256e+06	4.93888e+06	3.02192e+06	4.81002e+06	477805	905515	722015	900143
High	MS08_v1_1483	ID:23317214 fmt| 10-formyltetrahydrofolate:L-methionyl-tRNA(fMet) N-formyltransferase [Beijerinckiaceae Ms08]	0	58	17	109	17	311	6.36084e+06	5.34672e+06	2.09681e+06	4.68226e+06	6.0274e+06	7.41798e+06	7.81233e+06	7.22169e+06
High	MS08_v1_2000	ID:23317731 Alpha/beta hydrolase fold protein [Beijerinckiaceae Ms08]	0	41	11	50	11	323	4.23547e+06	4.3991e+06	2.93349e+06	3.43154e+06	912516	652288	1.0256e+06	498402
High	MS08_v1_0715	ID:23316446 pheS| phenylalanine tRNA synthetase, alpha subunit [Beijerinckiaceae Ms08]	0	42	16	143	16	365	1.26737e+07	1.03674e+07	9.89701e+06	1.23638e+07	3.00858e+06	4.29321e+06	4.09064e+06	4.16136e+06
High	MS08_v1_3246	ID:23318977 IRC| putative cystathionine beta-lyase [Beijerinckiaceae Ms08]	0	39	12	107	12	395	4.37419e+06	4.7772e+06	1.91752e+06	5.35474e+06	1.17536e+06	1.3145e+06	500711	774092
High	MS08_v1_1458	ID:23317189 Pentapeptide repeat protein [Beijerinckiaceae Ms08]	0	61	14	214	14	261	6.89289e+06	6.37202e+06	3.84424e+06	6.90553e+06	4.1868e+07	4.74431e+07	6.29103e+07	5.62013e+07
High	MS08_v1_1214	ID:23316945 Ribose-phosphate pyrophosphokinase [Beijerinckiaceae Ms08]	0	53	14	121	14	344	1.74098e+06	1.60426e+06	330665	2.38977e+06	1.74747e+07	1.81491e+07	1.9093e+07	1.99027e+07
High	MS08_v1_1363	ID:23317094 infC| protein chain initiation factor IF-3 [Beijerinckiaceae Ms08]	0	62	11	229	11	175	2.27112e+07	2.09557e+07	1.66767e+07	3.05965e+07	6.48586e+06	9.55382e+06	9.06284e+06	9.12907e+06
High	MS08_v1_2887	ID:23318618 exbB| Biopolymer transport protein ExbB [Beijerinckiaceae Ms08]	0	23	9	148	9	342	7.40397e+07	7.59681e+07	1.41495e+07	3.08853e+07	2.24669e+06	3.926e+06	4.43115e+06	2.11579e+06
High	MS08_v1_3183	ID:23318914 conserved exported protein of unknown function [Beijerinckiaceae Ms08]	0	61	9	192	9	174	1.66885e+07	1.85801e+07	2.59183e+07	2.34947e+07	6.08439e+07	5.85262e+07	4.9993e+07	6.96211e+07
High	MS08_v1_0884	ID:23316615 exported protein of unknown function [Beijerinckiaceae Ms08]	0	53	6	453	6	146	1.26846e+06	1.49358e+06	2.052e+06	4.01729e+06	1.5492e+09	1.08082e+09	6.00371e+08	1.09098e+09
High	MS08_v1_2673	ID:23318404 cysD| sulfate adenylyltransferase subunit 2 (Sulfate adenylate transferase) (SAT) (ATP-sulfurylase small subunit) [Beijerinckiaceae Ms08]	0	50	15	71	15	302	6.79355e+06	7.05806e+06	2.37032e+06	7.37397e+06	106645			559324
High	MS08_v1_0624	ID:23316355 Potential multicopper oxidase [Beijerinckiaceae Ms08]	0	31	12	112	12	477	8.38765e+06	8.29667e+06	5.66067e+06	1.00177e+07	1.37093e+06	1.02905e+06	1.37848e+06	1.24864e+06
High	MS08_v1_1489	ID:23317220 exported protein of unknown function [Beijerinckiaceae Ms08]	0	53	7	189	7	199	6.72603e+07	5.65378e+07	4.53108e+07	5.20449e+07	2.66476e+07	2.72009e+07	2.32711e+07	2.33513e+07
High	MS08_v1_0751	ID:23316482 PCCA| Propionyl-CoA carboxylase alpha chain, mitochondrial [Beijerinckiaceae Ms08]	0	34	18	95	18	668	4.21734e+06	4.05258e+06	3.95002e+06	4.19101e+06	4.09945e+06	3.85673e+06	2.69848e+06	4.56e+06
High	MS08_v1_1863	ID:23317594 atpC| ATP synthase epsilon chain [Beijerinckiaceae Ms08]	0	86	8	125	8	133	3.72543e+07	2.66889e+07	1.73516e+07	2.29574e+07	1.29223e+07	1.48538e+07	2.05921e+07	1.64753e+07
High	MS08_v1_2830	ID:23318561 fabH| 3-oxoacyl-[acyl-carrier-protein] synthase 3 [Beijerinckiaceae Ms08]	0	49	13	63	13	339	6.66712e+06	6.59029e+06	9.62926e+06	6.27736e+06	1.52653e+06	1.44618e+06	2.28781e+06	2.78316e+06
High	MS08_v1_0628	ID:23316359 lolD| outer membrane-specific lipoprotein transporter subunit ; ATP-binding component of ABC superfamily [Beijerinckiaceae Ms08]	0	62	9	47	9	227	3.65211e+06	8.84967e+06	1.35884e+06	7.32782e+06	549010	465262	587572	196031
High	MS08_v1_2381	ID:23318112 trpB| tryptophan synthase beta chain [Beijerinckiaceae Ms08]	0	37	14	158	14	415	8.08491e+06	8.71261e+06	4.67706e+06	8.20957e+06	1.20818e+07	1.32326e+07	1.13433e+07	1.24599e+07
High	MS08_v1_2422	ID:23318153 conserved exported protein of unknown function [Beijerinckiaceae Ms08]	0	69	10	110	10	181	7.32367e+06	7.29992e+06	1.67606e+06	4.70533e+06	4.39187e+06	3.74288e+06	3.58812e+06	2.55312e+06
High	MS08_v1_2974	ID:23318705 conserved protein of unknown function [Beijerinckiaceae Ms08]	0	50	12	110	12	287	9.3424e+06	8.20725e+06	4.90661e+06	8.48956e+06	7.92462e+06	9.39097e+06	7.99098e+06	8.24511e+06
High	MS08_v1_2319	ID:23318050 Glucan 1,4-alpha-glucosidase [Beijerinckiaceae Ms08]	0	36	17	113	17	502	6.88472e+06	7.19252e+06	3.9454e+06	6.81445e+06	3.97174e+06	3.28043e+06	3.43315e+06	7.13093e+06
High	MS08_v1_2102	ID:23317833 Extracellular solute-binding protein family 3 [Beijerinckiaceae Ms08]	0	46	13	114	13	297	9.45372e+06	8.06444e+06	2.36128e+07	9.53269e+06	1.74659e+06	3.70228e+06	1.79248e+06	1.23654e+06
High	MS08_v1_1591	ID:23317322 conserved exported protein of unknown function [Beijerinckiaceae Ms08]	0	46	12	91	12	347	5.65374e+06	5.57324e+06	2.1838e+06	6.57047e+06	3.36498e+06	3.09902e+06	1.90251e+06	1.26533e+06
High	MS08_v1_0390	ID:23316121 tlpA| Thiol:disulfide interchange protein TlpA [Beijerinckiaceae Ms08]	0	67	11	85	11	221	1.01286e+07	8.99616e+06	6.75013e+06	8.07005e+06	3.33623e+06	2.61068e+06	3.12674e+06	3.8222e+06
High	MS08_v1_0537	ID:23316268 msrA| Peptide methionine sulfoxide reductase MsrA [Beijerinckiaceae Ms08]	0	51	11	98	11	249	9.19728e+06	9.49112e+06	3.14202e+06	6.07948e+06	3.86555e+06	3.5024e+06	7.52166e+06	3.72547e+06
High	MS08_v1_2384	ID:23318115 L-sorbosone dehydrogenase [Beijerinckiaceae Ms08]	0	57	17	203	17	406	4.78472e+06	4.08233e+06	3.173e+06	5.75344e+06	2.33692e+07	2.88973e+07	2.70033e+07	3.27208e+07
High	MS08_v1_1595	ID:23317326 conserved protein of unknown function [Beijerinckiaceae Ms08]	0	47	13	128	13	293	1.31161e+07	1.39485e+07	8.33996e+06	1.31515e+07	1.01701e+07	1.0102e+07	9.4213e+06	8.57304e+06
High	MS08_v1_0525	ID:23316256 Glycosyl transferase group 1 [Beijerinckiaceae Ms08]	0	39	13	94	13	347	6.68999e+06	7.31861e+06	3.00175e+06	5.86824e+06	1.43594e+06	1.87041e+06	1.59379e+06	1.43687e+06
High	MS08_v1_3439	ID:23319170 sseA| 3-mercaptopyruvate sulfurtransferase [Beijerinckiaceae Ms08]	0	37	11	91	11	284	8.50747e+06	7.81456e+06	4.10974e+06	6.30736e+06	2.70858e+06	5.31235e+06	1.08899e+06	4.20962e+06
High	MS08_v1_1504	ID:23317235 lpxD| UDP-3-O-acylglucosamine N-acyltransferase [Beijerinckiaceae Ms08]	0	64	13	84	13	294	2.57055e+06	2.62238e+06	761131	2.91513e+06	3.97761e+06	4.34147e+06	5.6695e+06	4.64796e+06
High	MS08_v1_0726	ID:23316457 conserved exported protein of unknown function [Beijerinckiaceae Ms08]	0	61	8	45	8	147	6.5977e+06	6.71123e+06	4.92397e+06	7.40005e+06	34054.4	187728
High	MS08_v1_0621	ID:23316352 protein of unknown function [Beijerinckiaceae Ms08]	0	77	12	113	12	195	8.25353e+06	8.88445e+06	8.37382e+06	1.73797e+07	1.43245e+07	1.62619e+07	3.00112e+07	1.74078e+07
High	MS08_v1_0566	ID:23316297 gumK| UDP-glucuronate:glycolipid 2-beta-glucuronosyltransferase [Beijerinckiaceae Ms08]	0	60	22	80	22	379	5.11242e+06	4.51047e+06	2.59084e+06	4.21363e+06	484074	1.96591e+06	231054	243709
High	MS08_v1_1079	ID:23316810 secF| Protein translocase subunit SecF [Beijerinckiaceae Ms08]	0	34	10	102	10	315	2.47175e+07	2.03885e+07	2.64719e+07	1.57793e+07	1.07182e+07	1.05825e+07	1.15269e+07	1.12246e+07
High	MS08_v1_1877	ID:23317608 Two component transcriptional regulator, winged helix family [Beijerinckiaceae Ms08]	0	51	9	146	9	253	1.0743e+07	1.01776e+07	8.48963e+06	1.07084e+07	1.1875e+07	1.47341e+07	1.40383e+07	1.55249e+07
High	MS08_v1_0192	ID:23315923 dapA| 4-hydroxy-tetrahydrodipicolinate synthase [Beijerinckiaceae Ms08]	0	38	11	164	11	297	3.19967e+07	3.22859e+07	2.12995e+07	3.22056e+07	9.65588e+06	1.36372e+07	1.1069e+07	1.2313e+07
High	MS08_v1_1052	ID:23316783 conserved membrane protein of unknown function [Beijerinckiaceae Ms08]	0	39	13	100	13	354	3.65977e+06	3.81228e+06	1.35978e+06	4.00335e+06	5.02642e+06	4.5159e+06	4.2419e+06	5.50278e+06
High	MS08_v1_0145	ID:23315876 protein of unknown function [Beijerinckiaceae Ms08]	0	52	8	112	8	212	3.19061e+07	3.23973e+07	1.86137e+07	3.05417e+07	3.78099e+06	5.25658e+06	5.48335e+06	3.22681e+06
High	MS08_v1_1535	ID:23317266 ybeZ| putative enzyme with nucleoside triphosphate hydrolase domain [Beijerinckiaceae Ms08]	0	40	11	113	11	353	8.30631e+06	6.36747e+06	4.0196e+06	7.99747e+06	2.66439e+06	2.85807e+06	2.82789e+06	3.61427e+06
High	MS08_v1_1804	ID:23317535 Acriflavin resistance protein [Beijerinckiaceae Ms08]	0	23	17	89	17	1061	3.25214e+06	3.48142e+06	620089	1.71683e+06	5.89929e+06	4.76114e+06	7.1316e+06	4.2491e+06
High	MS08_v1_0555	ID:23316286 fabH| 3-oxoacyl-[acyl-carrier-protein] synthase III [Beijerinckiaceae Ms08]	0	42	12	96	12	341	1.25596e+07	1.39975e+07	5.25896e+06	1.2081e+07	1.38432e+06	1.66762e+06	650247	1.23818e+06
High	MS08_v1_2358	ID:23318089 nasD| Nitrate transport protein NasD [Beijerinckiaceae Ms08]	0	52	11	64	11	265	9.00932e+06	9.23821e+06	5.63881e+06	7.13268e+06	493055	605123	774511	521909
High	MS08_v1_0770	ID:23316501 Beta-glucanase/beta-glucan synthetase [Beijerinckiaceae Ms08]	0	35	6	66	6	280	1.73619e+07	1.41737e+07	1.6356e+07	1.77355e+07	4.2357e+06	1.0214e+07	1.14384e+07	5.65665e+06
High	MS08_v1_0310	ID:23316041 Hydrolase [Beijerinckiaceae Ms08]	0	67	14	141	14	295	2.30873e+06	1.95137e+06	1.54258e+06	1.87003e+06	3.46016e+07	5.37752e+07	5.33242e+07	6.4468e+07
High	MS08_v1_1449	ID:23317180 putative Mannosyl-glycoprotein endo-beta-N-acetylglucosaminidase [Beijerinckiaceae Ms08]	0	26	15	99	15	671	5.94183e+06	5.46227e+06	1.46252e+07	7.67586e+06	4.51178e+06	4.39187e+06	4.8968e+06	5.0737e+06
High	MS08_v1_0766	ID:23316497 sdhB| succinate dehydrogenase, FeS subunit [Beijerinckiaceae Ms08]	0	50	12	160	12	259	1.08933e+07	1.14648e+07	1.5395e+07	2.50138e+07	6.50391e+06	1.03995e+07	1.15579e+07	8.40369e+06
High	MS08_v1_3363	ID:23319094 Multi-sensor signal transduction histidine kinase [Beijerinckiaceae Ms08]	0	34	23	115	23	776	4.49388e+06	4.50243e+06	1.46844e+06	4.11696e+06	5.89565e+06	5.1679e+06	5.81517e+06	5.51257e+06
High	MS08_v1_1259	ID:23316990 carA| carbamoyl phosphate synthetase small subunit, glutamine amidotransferase [Beijerinckiaceae Ms08]	0	38	12	84	12	399	6.41592e+06	4.68931e+06	4.52152e+06	6.34783e+06	1.31467e+06	1.84453e+06	1.69861e+06	1.8818e+06
High	MS08_v1_0264	ID:23315995 mccA| Methylcrotonoyl-CoA carboxylase subunit alpha, mitochondrial [Beijerinckiaceae Ms08]	0	38	22	166	22	681	3.32776e+06	3.3408e+06	1.70462e+06	3.89586e+06	7.86883e+06	9.32164e+06	9.45548e+06	9.8428e+06
High	MS08_v1_1209	ID:23316940 Phosphoribosyltransferase [Beijerinckiaceae Ms08]	0	67	13	125	13	229	1.91035e+06	3.55126e+06		3.43122e+06	7.04774e+06	1.17926e+07	1.35252e+07	1.40703e+07
High	MS08_v1_2424	ID:23318155 Exopolysaccharide biosynthesis polyprenyl glycosylphosphotransferase [Beijerinckiaceae Ms08]	0	33	16	64	16	488	4.79639e+06	4.44979e+06	870961	4.04922e+06	1.14631e+06	1.12189e+06	848659	549815
High	MS08_v1_0665	ID:23316396 zwf| glucose-6-phosphate dehydrogenase [Beijerinckiaceae Ms08]	0	50	21	141	20	491	2.65582e+06	2.80063e+06	2.49621e+06	3.58927e+06	1.72927e+07	1.62943e+07	1.53549e+07	1.9551e+07
High	MS08_v1_2818	ID:23318549 glnD| Bifunctional uridylyltransferase/uridylyl-removing enzyme [Includes: [Protein-PII] uridylyltransferase ; [Protein-PII]-UMP uridylyl-removing enzyme] [Beijerinckiaceae Ms08]	0	29	26	63	26	947	2.60527e+06	1.98887e+06	1.24787e+06	1.66423e+06	702913	539230	426870	911162
High	MS08_v1_1007	ID:23316738 dnaJ| chaperone Hsp40, co-chaperone with DnaK [Beijerinckiaceae Ms08]	0	47	14	161	14	382	5.3968e+06	5.36187e+06	1.82095e+06	6.60623e+06	6.97125e+06	9.10144e+06	1.15939e+07	8.55903e+06
High	MS08_v1_0167	ID:23315898 Flavoprotein [Beijerinckiaceae Ms08]	0	50	8	78	8	182	9.82978e+06	9.03186e+06	6.12796e+06	9.62112e+06	2.5446e+06	3.7289e+06	4.20583e+06	2.71996e+06
High	MS08_v1_1883	ID:23317614 ftsK| DNA translocase FtsK [Beijerinckiaceae Ms08]	0	27	20	72	20	867	3.07728e+06	3.88687e+06	318850	3.33761e+06	69423
High	MS08_v1_2676	ID:23318407 potF| Putrescine-binding periplasmic protein [Beijerinckiaceae Ms08]	0	35	11	140	11	374	1.26698e+07	1.25366e+07	7.7394e+06	8.61498e+06	1.14401e+07	1.24328e+07	1.44759e+07	1.38245e+07
High	MS08_v1_2022	ID:23317753 hemE| Uroporphyrinogen decarboxylase [Beijerinckiaceae Ms08]	0	40	11	107	11	351	4.88886e+06	4.63908e+06	1.46548e+07	4.27592e+06	1.55233e+06	1.64562e+06	523446	1.41346e+06
High	MS08_v1_0508	ID:23316239 Molybdenum cofactor synthesis domain protein [Beijerinckiaceae Ms08]	0	63	17	121	17	408	3.17581e+06	3.48111e+06	1.32271e+06	1.96455e+06	6.11317e+06	6.27898e+06	6.52166e+06	6.00996e+06
High	MS08_v1_2555	ID:23318286 conserved membrane protein of unknown function [Beijerinckiaceae Ms08]	0	54	9	130	9	228	3.18487e+06	3.80783e+06	5.36807e+06	8.53073e+06	2.16638e+07	1.98072e+07	9.39512e+06	1.89958e+07
High	MS08_v1_0841	ID:23316572 bcp| putative peroxiredoxin bcp [Beijerinckiaceae Ms08]	0	58	10	92	10	173	1.21363e+07	1.11805e+07	1.25524e+07	1.4389e+07	3.21032e+06	4.98887e+06	969892	3.43748e+06
High	MS08_v1_1003	ID:23316734 Delta-1-pyrroline-5-carboxylate dehydrogenase [Beijerinckiaceae Ms08]	0	28	21	83	21	1033		96640.3	1.34085e+06	342093	6.34871e+06	6.60383e+06	5.6101e+06	7.44958e+06
High	MS08_v1_2291	ID:23318022 yhiI| putative HlyD family secretion protein [Beijerinckiaceae Ms08]	0	48	17	153	17	362	7.63248e+06	5.25908e+06	3.40955e+06	6.0941e+06	2.5496e+07	2.75515e+07	3.58873e+07	2.82747e+07
High	MS08_v1_0479	ID:23316210 accB| acetyl CoA carboxylase, BCCP subunit [Beijerinckiaceae Ms08]	0	38	6	104	6	175	2.67366e+07	2.73647e+07	1.66057e+07	2.26808e+07	1.48731e+07	1.56535e+07	1.59094e+07	1.37055e+07
High	MS08_v1_3193	ID:23318924 protein of unknown function [Beijerinckiaceae Ms08]	0	65	8	74	8	147	3.41696e+06	2.55588e+06	1.77408e+06	3.45919e+06	7.88281e+06	8.959e+06	1.15694e+07	7.97188e+06
High	MS08_v1_1221	ID:23316952 Uncharacterized AIPM/Hcit synthase family transferase aq_356 [Beijerinckiaceae Ms08]	0	38	18	149	18	531	7.48841e+06	7.47874e+06	2.88877e+06	7.06569e+06	9.64881e+06	1.01418e+07	9.30357e+06	1.35606e+07
High	MS08_v1_1233	ID:23316964 nadE| Glutamine-dependent NAD(+) synthetase [Beijerinckiaceae Ms08]	0	36	19	124	19	574	6.95826e+06	5.41025e+06	2.25473e+06	5.34872e+06	5.10697e+06	6.24267e+06	7.4181e+06	5.80408e+06
High	MS08_v1_2371	ID:23318102 dapD| 2,3,4,5-tetrahydropyridine-2-carboxylate N-succinyltransferase [Beijerinckiaceae Ms08]	0	36	10	154	10	285	1.69207e+07	1.63521e+07	8.40604e+06	1.53509e+07	4.41264e+06	6.22281e+06	5.53325e+06	5.1891e+06
High	MS08_v1_2569	ID:23318300 conserved exported protein of unknown function [Beijerinckiaceae Ms08]	0	38	10	127	10	348	8.75213e+06	8.04673e+06	7.2518e+06	6.7435e+06	1.32627e+07	1.47213e+07	1.72331e+07	1.38924e+07
High	MS08_v1_2558	ID:23318289 conserved protein of unknown function [Beijerinckiaceae Ms08]	0	76	11	243	11	139	4.61068e+07	4.07018e+07	1.22856e+07	6.14766e+07	7.47634e+07	7.08892e+07	1.18464e+08	7.93803e+07
High	MS08_v1_0394	ID:23316125 lysA| Diaminopimelate decarboxylase [Beijerinckiaceae Ms08]	0	41	13	113	13	421	1.65591e+07	1.66332e+07	4.18702e+06	8.51572e+06	8.04166e+06	5.50355e+06	6.44303e+06	6.00408e+06
High	MS08_v1_0142	ID:23315873 ctaC| putative cytochrome c oxidase subunit 2 [Beijerinckiaceae Ms08]	0	34	8	107	8	294	3.09871e+07	3.25952e+07	2.23993e+07	2.27374e+07	1.42109e+06	1.85914e+06	3.87405e+06	1.16107e+06
High	MS08_v1_1603	ID:23317334 putative MxaD protein [Beijerinckiaceae Ms08]	0	34	4	180	4	197	6.16576e+07	6.55365e+07	6.94532e+07	5.59274e+07	6.68179e+07	7.40425e+07	5.30679e+07	7.66473e+07
High	MS08_v1_0481	ID:23316212 Two-component sensor histidine kinase [Beijerinckiaceae Ms08]	0	29	12	113	12	464	5.96829e+06	5.7564e+06	1.27373e+06	4.16217e+06	6.81564e+06	6.07136e+06	1.00182e+07	6.87074e+06
High	MS08_v1_2614	ID:23318345 fabA| beta-hydroxydecanoyl thioester dehydrase [Beijerinckiaceae Ms08]	0	52	9	141	9	174	1.7625e+07	1.64789e+07	2.23474e+07	1.84013e+07	1.762e+07	2.07533e+07	2.1951e+07	1.99522e+07
High	MS08_v1_1359	ID:23317090 protein of unknown function [Beijerinckiaceae Ms08]	0	31	6	109	6	161	1.67107e+07	1.4684e+07	1.16639e+07	1.23295e+07	1.1415e+07	1.0616e+07	1.23156e+07	1.1637e+07
High	MS08_v1_0338	ID:23316069 protein of unknown function [Beijerinckiaceae Ms08]	0	54	11	121	11	256	8.24747e+06	8.30595e+06	8.59941e+06	1.50948e+07	8.9119e+06	1.00291e+07	1.12581e+07	1.29062e+07
High	MS08_v1_2375	ID:23318106 hisC| Histidinol-phosphate aminotransferase [Beijerinckiaceae Ms08]	0	42	12	100	12	376	5.49865e+06	5.17956e+06	1.02111e+07	5.29648e+06	6.15078e+06	5.321e+06	5.21723e+06	6.70265e+06
High	MS08_v1_0053	ID:23315784 glnG| fused DNA-binding response regulator in two-component regulatory system with GlnL: response regulator ; sigma54 interaction protein [Beijerinckiaceae Ms08]	0	39	17	75	17	493	4.82429e+06	5.30316e+06	3.32893e+06	6.05771e+06	1.20796e+06	1.22675e+06	1.73478e+06	1.2095e+06
High	MS08_v1_1999	ID:23317730 yfhM| AB hydrolase superfamily protein YfhM [Beijerinckiaceae Ms08]	0	51	12	128	12	294	1.56891e+07	1.62705e+07	1.03992e+07	1.72265e+07	3.50879e+06	3.25191e+06	4.63422e+06	3.19907e+06
High	MS08_v1_1933	ID:23317664 nodE| Nodulation protein E [Beijerinckiaceae Ms08]	0	36	9	93	9	408	9.20936e+06	8.20431e+06	6.62224e+06	8.01809e+06	503333	630146	410682	107800
High	MS08_v1_2516	ID:23318247 ATP-dependent DNA ligase LigD polymerase module / ATP-dependent DNA ligase LigD phosphoesterase module [Beijerinckiaceae Ms08]	0	28	26	145	26	878	896756	1.23536e+06	625079	1.80992e+06	1.72329e+07	1.78488e+07	1.69857e+07	1.89874e+07
High	MS08_v1_0144	ID:23315875 Invasion associated locus B family protein [Beijerinckiaceae Ms08]	0	59	8	140	8	177	3.58282e+07	3.10543e+07	1.797e+07	2.62916e+07	2.61247e+07	2.58414e+07	2.38678e+07	2.22693e+07
High	MS08_v1_0429	ID:23316160 putative lipoprotein [Beijerinckiaceae Ms08]	0	44	12	47	12	394	8.05928e+06	8.9737e+06	157943	3.85089e+06		448041	364609
High	MS08_v1_1592	ID:23317323 conserved exported protein of unknown function [Beijerinckiaceae Ms08]	0	75	14	144	14	208	1.15477e+07	1.24287e+07	5.89945e+06	1.25611e+07	8.23653e+06	7.3651e+06	6.62e+06	6.47019e+06
High	MS08_v1_2666	ID:23318397 kdpD| fused sensory histidine kinase in two-component regulatory system with KdpE: signal sensing protein ; sensory histidine kinase [Beijerinckiaceae Ms08]	0	35	25	84	25	903	1.22278e+06	1.60346e+06	1.35187e+06	2.20354e+06	1.04602e+06	1.69851e+06	1.25513e+06	2.31274e+06
High	MS08_v1_3284	ID:23319015 prfA| peptide chain release factor RF-1 [Beijerinckiaceae Ms08]	0	48	13	115	13	357	2.77499e+06	2.91869e+06	1.23464e+06	3.42198e+06	4.34737e+06	4.52909e+06	3.45427e+06	4.87507e+06
High	MS08_v1_0280	ID:23316011 Deoxyguanosinetriphosphate triphosphohydrolase-like protein [Beijerinckiaceae Ms08]	0	45	18	104	18	411	2.05657e+06	2.0648e+06	452229	2.52927e+06	3.40234e+06	2.33614e+06	2.26916e+06	2.36824e+06
High	MS08_v1_0693	ID:23316424 murQ| N-acetylmuramic acid 6-phosphate etherase [Beijerinckiaceae Ms08]	0	53	11	120	11	298	3.87786e+06	2.7959e+06	658100	2.01541e+06	1.48701e+07	1.72697e+07	1.83859e+07	1.9118e+07
High	MS08_v1_1124	ID:23316855 conserved exported protein of unknown function [Beijerinckiaceae Ms08]	0	49	14	129	14	345	9.28203e+06	9.18783e+06	5.5902e+06	1.05242e+07	1.59667e+07	1.71494e+07	1.42922e+07	1.34309e+07
High	MS08_v1_3442	ID:23319173 sodB| superoxide dismutase, Fe [Beijerinckiaceae Ms08]	0	44	7	144	7	198	1.99039e+07	2.74757e+07	5.56157e+07	5.43073e+07	1.10021e+07	1.24787e+07	1.55479e+07	1.36159e+07
High	MS08_v1_0459	ID:23316190 rplD| 50S ribosomal protein L4 [Beijerinckiaceae Ms08]	0	41	6	107	6	206	3.66302e+07	3.45743e+07	2.74642e+07	3.24554e+07	1.70062e+07	1.46061e+07	1.28278e+07	1.65828e+07
High	MS08_v1_0567	ID:23316298 Glycosyl transferase, family 2 [Beijerinckiaceae Ms08]	0	39	11	111	11	298	7.63787e+06	7.55509e+06	1.95075e+06	5.93154e+06	863555	657160	1.36019e+06	1.00634e+06
High	MS08_v1_2875	ID:23318606 putative outermembrane protein [Beijerinckiaceae Ms08]	0	33	7	471	7	142	5.21248e+07	5.35387e+07	1.20211e+08	8.63481e+07	4.712e+08	7.28797e+08	8.24947e+08	3.86392e+08
High	MS08_v1_2129	ID:23317860 Transcriptional regulator, CarD family [Beijerinckiaceae Ms08]	0	28	15	170	15	503	6.47158e+06	6.76898e+06	4.92968e+06	7.98041e+06	6.84197e+06	5.76068e+06	8.21931e+06	6.66246e+06
High	MS08_v1_1163	ID:23316894 actR| Acid tolerance regulatory protein ActR [Beijerinckiaceae Ms08]	0	61	10	139	10	200	1.4754e+07	1.23344e+07	1.19117e+07	1.66191e+07	1.29006e+07	1.54495e+07	1.43819e+07	1.7819e+07
High	MS08_v1_3428	ID:23319159 hemB| Delta-aminolevulinic acid dehydratase [Beijerinckiaceae Ms08]	0	58	15	89	15	355	3.2341e+06	2.31929e+06	1.31515e+06	4.54934e+06	3.2673e+06	3.43093e+06	4.11477e+06	4.4823e+06
High	MS08_v1_1470	ID:23317201 rpoZ| DNA-directed RNA polymerase subunit omega [Beijerinckiaceae Ms08]	0	58	10	184	10	131	3.7026e+07	3.93158e+07	2.59747e+07	3.08821e+07	2.407e+07	2.66842e+07	2.60948e+07	2.28488e+07
High	MS08_v1_3102	ID:23318833 putative signal transduction protein with CBS domains [Beijerinckiaceae Ms08]	0	69	9	133	9	143	1.59459e+07	1.5061e+07	2.19044e+07	2.61472e+07	2.07623e+07	2.34294e+07	2.23994e+07	2.76781e+07
High	MS08_v1_2565	ID:23318296 conserved protein of unknown function [Beijerinckiaceae Ms08]	0	43	9	112	9	343	4.91899e+06	5.13076e+06	3.76454e+06	4.32974e+06	8.8938e+06	7.48853e+06	1.00723e+07	1.10333e+07
High	MS08_v1_1426	ID:23317157 conserved protein of unknown function [Beijerinckiaceae Ms08]	0	43	18	94	18	560	2.58954e+06	1.85391e+06	1.67104e+07	7.07341e+06	4.50104e+06	4.9573e+06	5.72336e+06	3.24191e+06
High	MS08_v1_0412	ID:23316143 FolC bifunctional protein [Beijerinckiaceae Ms08]	0	50	18	71	18	438	3.04912e+06	3.21851e+06	2.10547e+06	2.57282e+06	862166	1.0469e+06	929757	721959
High	MS08_v1_2007	ID:23317738 ErfK/YbiS/YcfS/YnhG family protein [Beijerinckiaceae Ms08]	0	57	10	115	10	257	3.97898e+06	3.2583e+06	4.05816e+06	8.76595e+06	4.86039e+06	5.85103e+06	7.01811e+06	6.92151e+06
High	MS08_v1_0520	ID:23316251 hmgA| Homogentisate 1,2-dioxygenase [Beijerinckiaceae Ms08]	0	39	12	95	12	438	140239		79349.6	392586	1.21395e+07	1.6728e+07	1.58301e+07	1.60028e+07
High	MS08_v1_3367	ID:23319098 Efflux transporter, RND family, MFP subunit [Beijerinckiaceae Ms08]	0	40	11	144	11	310	5.17438e+06	4.0206e+06	2.99507e+06	4.0926e+06	1.09768e+07	1.19727e+07	9.11986e+06	1.07277e+07
High	MS08_v1_2920	ID:23318651 Extracellular solute-binding protein family 3 [Beijerinckiaceae Ms08]	0	38	9	104	9	292	5.65475e+06	7.10335e+06	4.41002e+06	7.51917e+06	3.15458e+06	6.42335e+06	6.50159e+06	4.46011e+06
High	MS08_v1_3370	ID:23319101 putative Pentapeptide repeat protein [Beijerinckiaceae Ms08]	0	26	14	117	14	707	1.51762e+06	1.75231e+06	946423	2.30881e+06	9.57452e+06	6.88638e+06	7.06162e+06	8.34397e+06
High	MS08_v1_0014	ID:23315745 NAD(P)H quinone oxidoreductase, PIG3 family [Beijerinckiaceae Ms08]	0	53	14	130	14	331	7.26437e+06	7.81884e+06	4.14711e+06	7.85944e+06	6.60378e+06	8.12388e+06	1.12752e+07	7.24718e+06
High	MS08_v1_1542	ID:23317273 Uncharacterized HTH-type transcriptional regulator Smed_0045 [Beijerinckiaceae Ms08]	0	61	6	81	6	140	8.98994e+06	7.07621e+06	1.16001e+07	1.40138e+07	4.384e+06	6.2058e+06	4.84432e+06	7.34366e+06
High	MS08_v1_1485	ID:23317216 conserved protein of unknown function [Beijerinckiaceae Ms08]	0	58	11	56	11	221	4.87936e+06	5.0328e+06	2.17573e+06	3.82807e+06		81847.5		97850.2
High	MS08_v1_1521	ID:23317252 conserved exported protein of unknown function [Beijerinckiaceae Ms08]	0	42	6	155	6	160	2.42991e+07	2.36224e+07	2.14719e+07	2.61375e+07	3.88825e+07	3.73667e+07	2.07082e+07	4.1167e+07
High	MS08_v1_2203	ID:23317934 tesB| acyl-CoA thioesterase II [Beijerinckiaceae Ms08]	0	29	8	98	8	334	3.70246e+06	2.75831e+06	3.10659e+06	3.79577e+06	2.79584e+06	2.24546e+06	2.99391e+06	7.45873e+06
High	MS08_v1_0094	ID:23315825 Serine-type D-Ala-D-Ala carboxypeptidase [Beijerinckiaceae Ms08]	0	38	17	61	17	555	3.14949e+06	3.11955e+06	553722	1.99643e+06	1.50925e+06	1.59173e+06	2.38411e+06	4.44981e+07
High	MS08_v1_0089	ID:23315820 Maf-like protein RPB_4346 [Beijerinckiaceae Ms08]	0	57	9	63	9	212	5.44817e+06	4.80011e+06	1.4397e+06	4.2986e+06	943213	1.44059e+06	1.89825e+06	1.04326e+06
High	MS08_v1_1980	ID:23317711 ABC-1 domain protein [Beijerinckiaceae Ms08]	0	42	18	82	18	455	5.26881e+06	5.26438e+06	1.68142e+06	3.3429e+06	1.00662e+06	869807	1.25216e+06	676673
High	MS08_v1_0903	ID:23316634 putative SAM-dependent methyltransferase [Beijerinckiaceae Ms08]	0	37	9	119	9	279	1.4668e+07	1.57199e+07	1.13945e+07	1.46669e+07	9.62047e+06	9.78367e+06	1.30027e+07	9.24402e+06
High	MS08_v1_0011	ID:23315742 conserved membrane protein of unknown function [Beijerinckiaceae Ms08]	0	29	7	126	7	214	4.80196e+07	5.1176e+07	5.64422e+07	6.46838e+07	5.98839e+07	5.565e+07	5.06347e+07	5.54334e+07
High	MS08_v1_2312	ID:23318043 protein of unknown function [Beijerinckiaceae Ms08]	0	73	7	96	7	122	2.72096e+07	2.61268e+07	3.92685e+07	3.99415e+07	4.16155e+06	5.13102e+06	5.12e+06	3.56806e+06
High	MS08_v1_1267	ID:23316998 Pyridoxamine 5'-phosphate oxidase-related FMN-binding [Beijerinckiaceae Ms08]	0	53	9	99	9	268	3.60011e+06	3.25554e+06	2.14807e+06	3.82446e+06	1.20506e+07	1.33542e+07	2.19814e+07	1.75834e+07
High	MS08_v1_2077	ID:23317808 Tetratricopeptide domain protein (fragment) [Beijerinckiaceae Ms08]	0	35	23	154	23	667	2.06873e+06	1.63109e+06	220203	1.55817e+06	6.37039e+06	6.92963e+06	8.57004e+06	6.89459e+06
High	MS08_v1_1068	ID:23316799 mutL| DNA mismatch repair protein MutL [Beijerinckiaceae Ms08]	0	38	19	63	19	605	1.79844e+06	1.73627e+06	1.37203e+06	2.6332e+06	41042.9	150340	435327	116226
High	MS08_v1_0694	ID:23316425 gspK| Glucosamine kinase GspK [Beijerinckiaceae Ms08]	0	67	12	74	12	292	248969	136068		468132	9.30198e+06	1.24401e+07	9.78941e+06	1.24167e+07
High	MS08_v1_0920	ID:23316651 conserved exported protein of unknown function [Beijerinckiaceae Ms08]	0	54	9	99	9	240	4.92543e+06	5.34419e+06	2.75584e+06	5.86308e+06	7.78815e+06	3.66841e+06	9.18295e+06	5.1281e+06
High	MS08_v1_0757	ID:23316488 purF| Amidophosphoribosyltransferase [Beijerinckiaceae Ms08]	0	25	12	123	12	508	5.18787e+06	4.86687e+06	3.8044e+06	7.73638e+06	5.73039e+06	7.02461e+06	6.47142e+06	8.09282e+06
High	MS08_v1_2400	ID:23318131 3'-5' exonuclease [Beijerinckiaceae Ms08]	0	52	10	94	10	232	1.61325e+07	1.14366e+07	8.62574e+06	8.08524e+06	7.10337e+06	7.36121e+06	8.86751e+06	8.99696e+06
High	MS08_v1_1736	ID:23317467 gloB| Hydroxyacylglutathione hydrolase [Beijerinckiaceae Ms08]	0	44	9	131	9	256	1.05748e+07	7.36459e+06	2.75426e+06	6.83832e+06	2.01456e+07	2.65712e+07	2.89371e+07	2.97855e+07
High	MS08_v1_1941	ID:23317672 conserved protein of unknown function [Beijerinckiaceae Ms08]	0	29	10	95	10	380	1.38846e+07	1.20735e+07	7.48742e+06	1.29935e+07	5.23299e+06	4.79669e+06	4.38454e+06	4.60485e+06
High	MS08_v1_0647	ID:23316378 groS| Cpn10 chaperonin GroES, small subunit of GroESL [Beijerinckiaceae Ms08]	0	66	8	466	8	95	3.80444e+08	4.10741e+08	2.88155e+08	3.85173e+08	2.98513e+08	2.47045e+08	3.38457e+08	2.46903e+08
High	MS08_v1_1154	ID:23316885 Mg2 transporter protein CorA family protein [Beijerinckiaceae Ms08]	0	38	11	88	11	328	4.30984e+06	4.11762e+06	1.22174e+06	3.59256e+06	5.3871e+06	5.21562e+06	5.88031e+06	6.0465e+06
High	MS08_v1_0345	ID:23316076 conserved protein of unknown function [Beijerinckiaceae Ms08]	0	51	7	106	7	176	9.98184e+06	1.03076e+07	5.24712e+06	8.10924e+06	3.48679e+06	4.33728e+06	4.45862e+06	4.07075e+06
High	MS08_v1_2088	ID:23317819 ftsE| Cell division ATP-binding protein FtsE [Beijerinckiaceae Ms08]	0	64	13	91	13	228	6.01833e+06	5.60856e+06	5.21402e+06	6.53118e+06	1.54923e+06	1.42533e+06	1.14631e+06	979484
High	MS08_v1_0625	ID:23316356 Magnesium transporter [Beijerinckiaceae Ms08]	0	19	7	70	7	478	3.65128e+06	4.07455e+06	603378	3.61619e+06	1.32803e+06	1.29068e+06	2.13555e+06	1.59959e+06
High	MS08_v1_1327	ID:23317058 apt| Adenine phosphoribosyltransferase [Beijerinckiaceae Ms08]	0	73	12	116	12	179	2.12924e+07	1.88668e+07	1.29104e+07	15266898	6.83231e+06	6.81256e+06	9.65988e+06	6.00615e+06
High	MS08_v1_3354	ID:23319085 rplM| 50S ribosomal subunit protein L13 [Beijerinckiaceae Ms08]	0	49	7	166	7	156	5.48217e+07	4.84394e+07	3.5632e+07	5.20891e+07	1.65513e+07	1.87689e+07	1.14811e+07	1.87755e+07
High	MS08_v1_0410	ID:23316141 trpA| Tryptophan synthase alpha chain [Beijerinckiaceae Ms08]	0	59	10	104	10	278	5.30487e+06	5.64007e+06	3.21443e+06	4.5871e+06	5.63785e+06	7.97603e+06	6.47289e+06	7.86387e+06
High	MS08_v1_0431	ID:23316162 surE| 5'-nucleotidase SurE [Beijerinckiaceae Ms08]	0	54	10	88	10	253	6.17481e+06	6.13513e+06	4.10279e+06	7.54275e+06	5.62639e+06	6.13894e+06	7.2572e+06	7.41991e+06
High	MS08_v1_1509	ID:23317240 dxr| 1-deoxy-D-xylulose 5-phosphate reductoisomerase [Beijerinckiaceae Ms08]	0	41	13	77	13	411	5.9354e+06	6.05843e+06	1.98668e+06	5.60333e+06	1.09977e+06	1.0722e+06	1.18094e+06	1.08764e+06
High	MS08_v1_3253	ID:23318984 Glutathione S-transferase domain [Beijerinckiaceae Ms08]	0	42	8	91	8	201	5.00415e+06	3.60554e+06	5.6587e+06	4.99543e+06	6.4268e+06	8.07169e+06	1.12373e+07	6.24679e+06
High	MS08_v1_2470	ID:23318201 uvrB| UvrABC system protein B [Beijerinckiaceae Ms08]	0	29	20	83	20	860	3.25251e+06	2.47855e+06	3.85855e+06	4.3202e+06	3.44073e+06	3.14922e+06	7.58068e+06	7.01343e+06
High	MS08_v1_0572	ID:23316303 ppnK| putative inorganic polyphosphate/ATP-NAD kinase [Beijerinckiaceae Ms08]	0	61	11	68	11	273	4.29555e+06	3.23643e+06	4.74983e+06	3.75105e+06	1.85626e+06	1.5921e+06	1.66033e+06	1.89329e+06
High	MS08_v1_0833	ID:23316564 Pyruvate, phosphate dikinase [Beijerinckiaceae Ms08]	0	41	22	135	22	545	5.55015e+06	5.7773e+06	3.72061e+06	5.57484e+06	3.1235e+06	2.57206e+06	3.86623e+06	3.5578e+06
High	MS08_v1_1046	ID:23316777 Universal stress protein [Beijerinckiaceae Ms08]	0	36	5	135	5	141	1.48861e+07	1.35601e+07	9.04754e+06	1.03059e+07	2.4856e+07	2.72587e+07	2.80323e+07	3.06605e+07
High	MS08_v1_1597	ID:23317328 moxI| Methanol dehydrogenase [cytochrome c] subunit 2 [Beijerinckiaceae Ms08]	0	53	5	459	5	106	4.88489e+08	4.773e+08	3.90474e+08	5.28335e+08	1.84696e+08	2.09533e+08	6.37014e+07	1.66629e+08
High	MS08_v1_1427	ID:23317158 Cupin 2 conserved barrel domain protein [Beijerinckiaceae Ms08]	0	39	3	313	3	143	6.44942e+07	7.34593e+07	6.127e+07	4.93649e+07	7.91249e+07	6.48283e+07	8.26987e+07	7.00928e+07
High	MS08_v1_1808	ID:23317539 N-acetylmuramyl-L-alanine amidase, negative regulator of AmpC, AmpD [Beijerinckiaceae Ms08]	0	57	11	57	11	241	3.94374e+06	3.7516e+06	1.97354e+06	4.83158e+06	462873	589651	733465	520106
High	MS08_v1_0303	ID:23316034 conserved exported protein of unknown function [Beijerinckiaceae Ms08]	0	35	12	206	12	227	5.71932e+06	7.98379e+06	1.8356e+07	1.9317e+07	2.42499e+07	2.93256e+07	2.1325e+07	2.79321e+07
High	MS08_v1_1178	ID:23316909 conserved protein of unknown function [Beijerinckiaceae Ms08]	0	45	13	100	13	376	3.2679e+06	3.46382e+06	5.01574e+06	4.85076e+06	1.50193e+07	1.23303e+07	1.1322e+07	1.4568e+07
High	MS08_v1_2398	ID:23318129 protein of unknown function [Beijerinckiaceae Ms08]	0	39	13	50	13	439	2.77815e+06	2.28383e+06	2.75219e+06	3.31472e+06	278564	51646.6	58549.5
High	MS08_v1_1918	ID:23317649 cysQ| 3'(2'),5'-bisphosphate nucleotidase CysQ [Beijerinckiaceae Ms08]	0	44	10	52	10	277	2.97634e+06	2.41997e+06	1.58117e+06	3.32791e+06	954495	915273	279449	886821
High	MS08_v1_0245	ID:23315976 fdxB| 2Fe-2S ferredoxin [Beijerinckiaceae Ms08]	0	90	6	132	6	106	1.93388e+07	1.93678e+07	1.2693e+07	1.69739e+07	2.35832e+07	3.03049e+07	2.91708e+07	2.59107e+07
High	MS08_v1_3311	ID:23319042 Signal transduction histidine kinase (fragment) [Beijerinckiaceae Ms08]	0	42	12	143	12	344	8.59099e+06	7.87219e+06	4.06404e+06	8.48391e+06	1.08967e+07	1.14544e+07	1.25708e+07	1.29683e+07
High	MS08_v1_3201	ID:23318932 Cytochrome P450 [Beijerinckiaceae Ms08]	0	39	16	68	16	422	4.45082e+06	4.44072e+06	2.41101e+06	4.64313e+06	572297	223950	752565	101723
High	MS08_v1_0409	ID:23316140 2-deoxycytidine 5-triphosphate deaminase [Beijerinckiaceae Ms08]	0	46	13	66	13	401	2.87342e+06	2.02649e+06	1.02348e+06	3.2258e+06	589055	691413	488317	1.55659e+06
High	MS08_v1_2440	ID:23318171 putative phytoene synthase [Beijerinckiaceae Ms08]	0	42	10	75	10	279	6.95845e+06	5.77578e+06	2.94757e+06	6.10996e+06	1.93402e+06	1.09165e+06	3.65887e+06	2.24192e+06
High	MS08_v1_0267	ID:23315998 dapE| Succinyl-diaminopimelate desuccinylase [Beijerinckiaceae Ms08]	0	45	15	88	15	392	4.01988e+06	2.51836e+06	1.77294e+06	3.14663e+06	4.6464e+06	4.69578e+06	4.2862e+06	4.79807e+06
High	MS08_v1_1531	ID:23317262 Scaffold protein Nfu/NifU [Beijerinckiaceae Ms08]	0	53	9	115	9	187	2.73147e+07	2.69313e+07	1.30557e+07	1.80451e+07	1.09529e+07	1.37848e+07	1.61337e+07	1.25903e+07
High	MS08_v1_3252	ID:23318983 dnaE| DNA polymerase III subunit alpha [Beijerinckiaceae Ms08]	0	22	20	72	20	1152	2.03707e+06	2.1711e+06	1.14452e+06	1.63299e+06	198470	279778	267360	177208
High	MS08_v1_1217	ID:23316948 ABCB| ABC transporter B family member 25, mitochondrial [Beijerinckiaceae Ms08]	0	27	15	63	14	657	2.97433e+06	2.25451e+06		1.81247e+06	618046	684116	665193	781363
High	MS08_v1_1161	ID:23316892 regB| Sensor histidine kinase RegB [Beijerinckiaceae Ms08]	0	27	10	88	10	455	5.48373e+06	5.3007e+06	3.51402e+06	5.25579e+06	1.739e+06	2.26487e+06	1.4101e+06	2.14639e+06
High	MS08_v1_3386	ID:23319117 protein of unknown function [Beijerinckiaceae Ms08]	0	83	4	76	4	89	2.83477e+07	2.93986e+07	3.34618e+07	3.463e+07	1.31669e+08	1.7853e+08	2.22308e+08	1.96285e+08
High	MS08_v1_1037	ID:23316768 upp| uracil phosphoribosyltransferase [Beijerinckiaceae Ms08]	0	54	9	93	9	213	2.53524e+06	1.90897e+06	978456	1.66374e+06	2.78067e+06	3.05785e+06	5.32697e+06	3.10487e+06
High	MS08_v1_2035	ID:23317766 hisF| imidazole glycerol phosphate synthase, catalytic subunit with HisH [Beijerinckiaceae Ms08]	0	65	13	66	13	274	7.08475e+06	6.22787e+06	3.89219e+06	4.31164e+06	3.19795e+06	3.89585e+06	3.73855e+06	4.04548e+06
High	MS08_v1_2819	ID:23318550 grpE| Protein GrpE [Beijerinckiaceae Ms08]	0	46	8	126	8	197	1.98679e+07	1.78898e+07	1.29762e+07	2.1393e+07	6.12795e+06	6.71786e+06	1.05786e+07	7.15701e+06
High	MS08_v1_1148	ID:23316879 Nitrilase/cyanide hydratase and apolipoprotein N-acyltransferase [Beijerinckiaceae Ms08]	0	48	11	98	11	309	5.36202e+06	5.23926e+06	3.05528e+06	5.24257e+06	6.99193e+06	9.17513e+06	1.56216e+07	1.01038e+07
High	MS08_v1_3286	ID:23319017 Transglutaminase domain protein [Beijerinckiaceae Ms08]	0	42	11	138	11	280	5.23538e+06	4.36482e+06	2.93486e+06	4.06015e+06	1.03773e+07	1.08045e+07	1.06663e+07	1.26412e+07
High	MS08_v1_0860	ID:23316591 PDH| Pyruvate dehydrogenase E1 component subunit beta-1, mitochondrial [Beijerinckiaceae Ms08]	0	52	14	143	14	339	1.76527e+06	1.35528e+06	706163	1.16167e+06	8.43061e+06	1.0568e+07	1.02137e+07	9.11211e+06
High	MS08_v1_2523	ID:23318254 rpiA| Ribose-5-phosphate isomerase A [Beijerinckiaceae Ms08]	0	35	9	105	9	260	1.17811e+07	1.3128e+07	6.07339e+06	8.60704e+06	5.44211e+06	7.03719e+06	9.30341e+06	7.02896e+06
High	MS08_v1_1537	ID:23317268 CBS domain containing protein [Beijerinckiaceae Ms08]	0	33	10	71	10	353	4.82832e+06	4.75102e+06	2.20503e+06	5.14625e+06	1.33414e+06	1.63061e+06	1.92894e+06	1.24436e+06
High	MS08_v1_0575	ID:23316306 Citrate lyase beta subunit [Beijerinckiaceae Ms08]	0	73	12	80	12	290	4.54485e+06	4.71755e+06	2.33722e+06	4.48114e+06	3.67277e+06	4.42186e+06	4.76197e+06	4.64658e+06
High	MS08_v1_0198	ID:23315929 3,4-dihydroxy-2-butanone 4-phosphate synthase [Beijerinckiaceae Ms08]	0	43	14	117	14	429	4.69828e+06	4.65185e+06	2.59815e+06	4.34364e+06	1.04196e+07	1.29653e+07	1.37944e+07	1.23113e+07
High	MS08_v1_1675	ID:23317406 conserved protein of unknown function [Beijerinckiaceae Ms08]	0	50	12	135	12	214	1.30773e+07	1.36919e+07	6.57058e+06	9.5346e+06	1.20708e+07	1.40338e+07	1.32343e+07	1.6068e+07
High	MS08_v1_0509	ID:23316240 glpD| Glycerol-3-phosphate dehydrogenase [Beijerinckiaceae Ms08]	0	42	18	84	18	509	1.83776e+06	1.6587e+06	911435	2.05286e+06	6.26411e+06	6.45731e+06	1.11495e+07	7.06942e+06
High	MS08_v1_0128	ID:23315859 conserved protein of unknown function [Beijerinckiaceae Ms08]	0	42	9	179	9	286	5.07373e+06	5.06745e+06	866536	3.77308e+06	9.36598e+06	6.9186e+06	1.20871e+07	9.60268e+06
High	MS08_v1_1954	ID:23317685 conserved exported protein of unknown function [Beijerinckiaceae Ms08]	0	44	13	88	13	333	9.52844e+06	6.92184e+06	3.86215e+06	7.50319e+06	3.72965e+06	3.63994e+06	6.07414e+06	4.38048e+06
High	MS08_v1_3388	ID:23319119 protein of unknown function [Beijerinckiaceae Ms08]	0	72	6	119	6	74	1.57685e+07	1.32083e+07	3.65758e+07	1.42249e+07	6.91821e+07	7.4674e+07	8.19422e+07	8.15532e+07
High	MS08_v1_0265	ID:23315996 Mccc| Methylcrotonoyl-CoA carboxylase beta chain, mitochondrial [Beijerinckiaceae Ms08]	0	40	17	90	17	535	2.65952e+06	2.89166e+06	1.70786e+06	3.22477e+06	9.6226e+06	9.7395e+06	9.49712e+06	8.6453e+06
High	MS08_v1_0710	ID:23316441 conserved protein of unknown function [Beijerinckiaceae Ms08]	0	31	8	102	8	318	8.29964e+06	6.63841e+06	7.77629e+06	1.81815e+07	3.67413e+06	3.77086e+06	4.49141e+06	4.73681e+06
High	MS08_v1_3187	ID:23318918 conserved exported protein of unknown function [Beijerinckiaceae Ms08]	0	69	13	94	13	202	4.89674e+06	4.07854e+06	2.26935e+06	3.8855e+06	4.73108e+06	6.18718e+06	3.72153e+06	2.72706e+06
High	MS08_v1_0762	ID:23316493 Phospholipase/carboxylesterase [Beijerinckiaceae Ms08]	0	42	10	130	10	313	7.07827e+06	6.39109e+06	3.5172e+06	6.15171e+06	7.44636e+06	9.26717e+06	7.5964e+06	7.66813e+06
High	MS08_v1_0477	ID:23316208 conserved protein of unknown function [Beijerinckiaceae Ms08]	0	40	9	131	9	248	2.02617e+07	1.89621e+07	1.30242e+07	1.87676e+07	1.0021e+07	1.12751e+07	1.44847e+07	1.26207e+07
High	MS08_v1_3318	ID:23319049 putative oxidoreductase [Beijerinckiaceae Ms08]	0	45	12	83	12	340	910467	769877	364269	564135	1.18291e+07	1.28145e+07	2.22604e+07	1.59178e+07
High	MS08_v1_2509	ID:23318240 conserved protein of unknown function [Beijerinckiaceae Ms08]	0	64	5	103	5	107	1.23858e+07	1.17599e+07	1.55457e+07	2.00272e+07	1.14351e+07	1.31675e+07	1.59017e+07	1.57658e+07
High	MS08_v1_0208	ID:23315939 hypB| Hydrogenase nickel incorporation protein HypB [Beijerinckiaceae Ms08]	0	41	8	84	8	303	117470	47294.5	504224	757172	3.38232e+07	3.48575e+07	2.47054e+07	3.80217e+07
High	MS08_v1_1528	ID:23317259 SWIB/MDM2 domain protein [Beijerinckiaceae Ms08]	0	57	8	504	8	104	2.36332e+08	2.46947e+08	2.44027e+08	2.70863e+08	5.1191e+08	5.28894e+08	5.33704e+08	5.14221e+08
High	MS08_v1_0065	ID:23315796 conserved protein of unknown function [Beijerinckiaceae Ms08]	0	39	9	56	9	334	1.5228e+07	1.63332e+07	9.56036e+06	1.51855e+07	1.09359e+06	1.22016e+06	2.01414e+06	1.14428e+06
High	MS08_v1_0450	ID:23316181 rplN| 50S ribosomal protein L14 [Beijerinckiaceae Ms08]	0	53	7	141	7	122	3.68308e+07	3.36384e+07	2.72625e+07	2.75315e+07	6.81682e+06	9.52454e+06	6.40606e+06	1.01906e+07
High	MS08_v1_2539	ID:23318270 conserved exported protein of unknown function [Beijerinckiaceae Ms08]	0	51	6	96	5	206	7.64023e+06	7.64245e+06	7.76073e+06	8.82449e+06	5.48337e+06	5.52155e+06	5.76734e+06	4.53589e+06
High	MS08_v1_1058	ID:23316789 ilvH| acetolactate synthase III, thiamin-dependent, small subunit [Beijerinckiaceae Ms08]	0	75	9	109	9	183	9.62015e+06	9.87604e+06	6.88242e+06	8.85609e+06	9.388e+06	1.05683e+07	1.53912e+07	1.1799e+07
High	MS08_v1_0843	ID:23316574 lexA| LexA repressor [Beijerinckiaceae Ms08]	0	49	11	95	11	237	4.80355e+06	4.65307e+06	5.41299e+06	8.32687e+06	4.8972e+06	5.51585e+06	4.89796e+06	6.41884e+06
High	MS08_v1_2445	ID:23318176 ispH| 1-hydroxy-2-methyl-2-(E)-butenyl 4-diphosphate reductase, 4Fe-4S protein [Beijerinckiaceae Ms08]	0	51	14	80	13	307	3.95104e+06	3.80879e+06	8.02624e+06	9.2578e+06	119452		397318	151788
High	MS08_v1_1532	ID:23317263 Peptidase M22 glycoprotease [Beijerinckiaceae Ms08]	0	54	9	135	9	229	1.11784e+07	1.16527e+07	7.06556e+06	1.10171e+07	5.97868e+06	5.80356e+06	5.91866e+06	7.10684e+06
High	MS08_v1_1382	ID:23317113 leuA| 2-isopropylmalate synthase [Beijerinckiaceae Ms08]	0	47	18	103	18	527	4.46646e+06	3.82991e+06	2.20364e+06	6.28496e+06	1.13555e+07	6.76954e+06	5.62798e+06	7.91998e+06
High	MS08_v1_0473	ID:23316204 rplK| 50S ribosomal protein L11 [Beijerinckiaceae Ms08]	0	48	7	133	7	142	5.27596e+07	6.04831e+07	4.21278e+07	5.18147e+07	1.79694e+07	2.53991e+07	1.66839e+07	2.19552e+07
High	MS08_v1_3244	ID:23318975 conserved exported protein of unknown function [Beijerinckiaceae Ms08]	0	48	9	50	9	267	1.84981e+06	1.55742e+06	804561	1.84475e+06	1.56048e+06	1.64084e+06	1.99923e+06	1.26323e+06
High	MS08_v1_2138	ID:23317869 Zinkmetallo protease [Beijerinckiaceae Ms08]	0	31	16	91	16	499	2.943e+06	3.18372e+06	1.56735e+06	4.11389e+06	334059	708395	433329	206805
High	MS08_v1_0801	ID:23316532 Riboflavin biosynthesis protein RibD [Beijerinckiaceae Ms08]	0	53	16	70	16	370	4.89968e+06	4.80989e+06	1.96075e+06	4.44726e+06	2.16375e+06	2.40634e+06	1.99905e+06	1.84258e+06
High	MS08_v1_3043	ID:23318774 Glycoside hydrolase family 3 domain protein [Beijerinckiaceae Ms08]	0	35	10	113	10	365	6.61822e+06	5.98683e+06	2.47666e+06	5.894e+06	3.66135e+06	4.22346e+06	5.215e+06	3.37896e+06
High	MS08_v1_3196	ID:23318927 Efflux transporter, RND family, MFP subunit [Beijerinckiaceae Ms08]	0	43	9	90	9	295	3.14377e+06	3.05148e+06	934280	2.47828e+06	5.92988e+06	6.54189e+06	7.09471e+06	5.66206e+06
High	MS08_v1_2029	ID:23317760 Peptidase M23B [Beijerinckiaceae Ms08]	0	29	7	113	7	294	9.83968e+06	1.09831e+07	6.90827e+06	7.39569e+06	1.11647e+07	1.26905e+07	1.43803e+07	1.35754e+07
High	MS08_v1_1571	ID:23317302 cysA| Sulfate/thiosulfate import ATP-binding protein CysA [Beijerinckiaceae Ms08]	0	54	12	79	12	349	1.66524e+06	1.42987e+06	950764	2.10138e+06	3.34716e+06	1.494e+06	1.07884e+06	1.14023e+06
High	MS08_v1_1882	ID:23317613 Glycosyl transferase group 1 [Beijerinckiaceae Ms08]	0	41	13	48	13	381	3.86546e+06	3.84964e+06	2.65254e+06	1.96989e+06	502241	164927	338089	360814
High	MS08_v1_2229	ID:23317960 ald| Alanine dehydrogenase [Beijerinckiaceae Ms08]	0	42	11	74	11	372	3.62343e+06	3.61686e+06	1.54339e+06	2.41262e+06	4.38817e+06	4.9526e+06	1.1194e+07	6.14151e+06
High	MS08_v1_0180	ID:23315911 Methyltransferase FkbM family [Beijerinckiaceae Ms08]	0	40	9	139	9	215	2.36631e+07	2.04592e+07	1.57285e+07	1.87905e+07	5.82034e+06	7.02789e+06	8.62553e+06	8.12034e+06
High	MS08_v1_0749	ID:23316480 PCCB| Propionyl-CoA carboxylase beta chain, mitochondrial [Beijerinckiaceae Ms08]	0	38	14	105	14	510	1.51802e+06	1.57407e+06	559504	1.79837e+06	5.09333e+06	5.15085e+06	6.9015e+06	6.16985e+06
High	MS08_v1_2068	ID:23317799 alkH| Aldehyde dehydrogenase [Beijerinckiaceae Ms08]	0	36	12	86	12	477	3.2206e+06	3.18811e+06	1.35654e+06	3.36314e+06	3.19686e+06	3.41466e+06	5.29761e+06	2.42687e+06
High	MS08_v1_2522	ID:23318253 conserved exported protein of unknown function [Beijerinckiaceae Ms08]	0	41	6	99	6	182	3.17708e+07	3.2092e+07	1.76205e+07	2.66108e+07	1.22558e+07	1.24696e+07	1.07442e+07	1.13114e+07
High	MS08_v1_0190	ID:23315921 Alpha/beta hydrolase fold protein [Beijerinckiaceae Ms08]	0	56	14	64	14	301	5.46891e+06	4.65603e+06	3.92711e+06	5.28062e+06	1.74168e+06	1.55559e+06	1.8109e+06	1.6547e+06
High	MS08_v1_1435	ID:23317166 bah| Acetyl-hydrolase [Beijerinckiaceae Ms08]	0	39	9	103	9	299	6.33099e+06	6.36643e+06	4.67125e+06	6.60061e+06	4.99092e+06	5.73095e+06	7.30007e+06	9.98273e+06
High	MS08_v1_0906	ID:23316637 Cation diffusion facilitator family transporter [Beijerinckiaceae Ms08]	0	39	14	73	14	470	3.67979e+06	3.85147e+06	1.76826e+06	3.46758e+06	2.91589e+06	2.64909e+06	2.52212e+06	2.29291e+06
High	MS08_v1_2513	ID:23318244 conserved protein of unknown function [Beijerinckiaceae Ms08]	0	64	5	148	5	106	5.35465e+07	4.75087e+07	1.92934e+07	3.8335e+07	7.63331e+07	1.00783e+08	1.48987e+08	1.00629e+08
High	MS08_v1_1060	ID:23316791 conserved protein of unknown function [Beijerinckiaceae Ms08]	0	46	11	89	11	274	6.83703e+06	6.82061e+06	3.15146e+06	6.81912e+06	4.86824e+06	4.01146e+06	4.85571e+06	4.63256e+06
High	MS08_v1_0435	ID:23316166 tatA| Sec-independent protein translocase protein TatA [Beijerinckiaceae Ms08]	0	43	4	89	4	80	2.81661e+07	3.95502e+07	2.64866e+07	3.96605e+07	2.92436e+08	1.13634e+08	7.46864e+07	1.4197e+08
High	MS08_v1_3276	ID:23319007 Ubiquinone biosynthesis hydroxylase, UbiH/UbiF/VisC/COQ6 family [Beijerinckiaceae Ms08]	0	42	13	68	13	436	4.45351e+06	4.30931e+06	2.17741e+06	4.0172e+06	57568.2	173227	269027	124726
High	MS08_v1_0461	ID:23316192 rpsJ| 30S ribosomal protein S10 [Beijerinckiaceae Ms08]	0	58	7	142	7	102	3.76603e+07	3.64177e+07	2.62396e+07	3.70902e+07	1.4159e+07	2.13865e+07	2.37192e+07	2.22251e+07
High	MS08_v1_1713	ID:23317444 pqqE| Coenzyme PQQ synthesis protein E [Beijerinckiaceae Ms08]	0	68	17	49	17	375	1.40357e+06	2.08596e+06	1.00357e+06	2.01602e+06	438259	546976	660485	421860
High	MS08_v1_2631	ID:23318362 conserved exported protein of unknown function [Beijerinckiaceae Ms08]	0	38	4	90	4	158	5.00139e+06	6.00271e+06		6.28213e+06	7.20785e+06	9.9505e+06	7.74583e+06	818526
High	MS08_v1_0224	ID:23315955 protein of unknown function [Beijerinckiaceae Ms08]	0	45	11	120	11	262	1.55295e+07	1.62552e+07	1.33799e+07	1.58203e+07	8.15707e+06	8.32762e+06	1.10787e+07	9.83026e+06
High	MS08_v1_2054	ID:23317785 parA| Chromosome partitioning protein ParA [Beijerinckiaceae Ms08]	0	58	11	73	11	273	7.87367e+06	7.96556e+06	5.27546e+06	6.50186e+06	1.95825e+06	2.29937e+06	2.94419e+06	1.89217e+06
High	MS08_v1_1257	ID:23316988 conserved protein of unknown function [Beijerinckiaceae Ms08]	0	30	5	126	5	233	2.58514e+06	2.32676e+06	7.94735e+06	3.35002e+06	1.77245e+08	8.68994e+07	5.4421e+07	7.63551e+07
High	MS08_v1_0483	ID:23316214 protein of unknown function [Beijerinckiaceae Ms08]	0	54	7	95	7	128	1.01303e+07	1.27058e+07	7.30134e+06	9.63889e+06	1.8014e+07	1.49302e+07	2.2896e+07	1.81051e+07
High	MS08_v1_0071	ID:23315802 Peptidase S8 and S53 subtilisin kexin sedolisin (fragment) [Beijerinckiaceae Ms08]	0	41	16	55	16	577	2.71401e+06	2.5964e+06	958760	2.04664e+06	251790	134942	345296	187245
High	MS08_v1_0181	ID:23315912 Glycosyl transferase, group 1 (fragment) [Beijerinckiaceae Ms08]	0	46	8	49	8	283	4.09486e+06	2.04663e+06	2.17208e+06	4.90074e+06	397324	133895	122294
High	MS08_v1_1970	ID:23317701 protein of unknown function [Beijerinckiaceae Ms08]	0	78	6	209	6	74	1.27612e+07	1.26598e+07	1.68461e+07	2.35938e+07	2.30227e+08	1.48026e+08	1.97152e+08	1.81923e+08
High	MS08_v1_1323	ID:23317054 conserved exported protein of unknown function [Beijerinckiaceae Ms08]	0	50	7	91	7	163	1.4727e+07	1.2661e+07	1.40293e+07	1.28728e+07	1.97476e+07	2.14869e+07	2.01303e+07	1.96059e+07
High	MS08_v1_0753	ID:23316484 radA| DNA repair protein RadA homolog [Beijerinckiaceae Ms08]	0	45	15	53	15	472	1.30743e+06	1.23734e+06	1.2409e+06	1.3249e+06	63882	89081.8	216034	171462
High	MS08_v1_1879	ID:23317610 Exodeoxyribonuclease III Xth [Beijerinckiaceae Ms08]	0	42	10	51	10	308	8.16951e+06	8.97546e+06	5.91856e+06	1.05506e+07	1.27946e+06	1.86683e+06	1.97541e+06	1.33194e+06
High	MS08_v1_2124	ID:23317855 dfp| fused 4'-phosphopantothenoylcysteine decarboxylase ; phosphopantothenoylcysteine synthetase, FMN-binding [Beijerinckiaceae Ms08]	0	38	12	126	12	420	4.34425e+06	4.82637e+06	1.80369e+06	4.63843e+06	6.5348e+06	6.57113e+06	5.80736e+06	8.3726e+06
High	MS08_v1_3408	ID:23319139 atoA| acetoacetyl-CoA transferase, beta subunit [Beijerinckiaceae Ms08]	0	47	8	69	8	220	1.17699e+07	1.1177e+07	8.75061e+06	1.05234e+07	4.7318e+06	4.5003e+06	5.81849e+06	3.52333e+06
High	MS08_v1_0458	ID:23316189 rplW| 50S ribosomal subunit protein L23 [Beijerinckiaceae Ms08]	0	50	4	175	4	103	3.86791e+07	3.68358e+07	1.97325e+07	2.81376e+07	7.27076e+06	1.3145e+07	8.28787e+06	1.27108e+07
High	MS08_v1_2341	ID:23318072 conserved protein of unknown function [Beijerinckiaceae Ms08]	0	50	7	145	7	169	9.39335e+07	7.79419e+07	5.62908e+07	6.65564e+07	9.38733e+07	8.64685e+07	1.02304e+08	9.39005e+07
High	MS08_v1_0820	ID:23316551 Glyoxalase/bleomycin resistance protein/dioxygenase [Beijerinckiaceae Ms08]	0	50	8	63	8	157	9.28411e+06	1.11071e+07	9.96133e+06	1.0315e+07	322496	73348.1
High	MS08_v1_0289	ID:23316020 tmk| Thymidylate kinase [Beijerinckiaceae Ms08]	0	57	11	66	11	233	3.84132e+06	4.1488e+06	1.80568e+06	6.95522e+06	1.33924e+06	1.49495e+06	1.90059e+06	1.33949e+06
High	MS08_v1_2046	ID:23317777 conserved exported protein of unknown function [Beijerinckiaceae Ms08]	0	49	11	173	11	204	3.9121e+07	3.14341e+07	1.5396e+06	1.58994e+07	5.10656e+06	4.10422e+06	1.81319e+08	4.55543e+06
High	MS08_v1_1927	ID:23317658 conserved protein of unknown function [Beijerinckiaceae Ms08]	0	53	9	111	9	249	5.95071e+06	5.97003e+06	5.59675e+06	8.2934e+06	1.23608e+07	1.2386e+07	1.81901e+07	1.35691e+07
High	MS08_v1_0059	ID:23315790 Sun protein [Beijerinckiaceae Ms08]	0	38	15	93	15	473	2.5581e+06	2.61745e+06	561753	4.0251e+06	1.41853e+06	1.51549e+06	955828	357414
High	MS08_v1_3395	ID:23319126 protein of unknown function [Beijerinckiaceae Ms08]	0	46	12	54	12	356	2.14544e+06	1.77869e+06	4.32996e+06	3.63027e+06	37660.3
High	MS08_v1_2184	ID:23317915 yqeC| putative 6-phosphogluconate dehydrogenase YqeC [Beijerinckiaceae Ms08]	0	42	10	68	10	331	602838	607603	1.18846e+06	2.18996e+06	8.93128e+06	9.51974e+06	1.01e+07	1.08439e+07
High	MS08_v1_3394	ID:23319125 protein of unknown function [Beijerinckiaceae Ms08]	0	44	13	55	13	356	1.60652e+06	1.73433e+06	5.18589e+06	5.97165e+06	32462.7			173894
High	MS08_v1_2057	ID:23317788 Orotate phosphoribosyltransferase (modular protein) [Beijerinckiaceae Ms08]	0	43	9	73	9	232	5.68609e+06	5.20752e+06	2.55532e+06	5.43676e+06	2.19348e+06	2.52161e+06	1.78194e+06	2.17348e+06
High	MS08_v1_0638	ID:23316369 rfbB| O-antigen export system ATP-binding protein RfbB [Beijerinckiaceae Ms08]	0	32	7	54	7	257	5.84024e+06	6.84309e+06	2.74495e+06	4.83958e+06	39818.9
High	MS08_v1_1329	ID:23317060 rph| Ribonuclease PH [Beijerinckiaceae Ms08]	0	46	8	78	8	237	9.34329e+06	7.9797e+06	5.88068e+06	8.92956e+06	8.10163e+06	9.03338e+06	8.65206e+06	7.23873e+06
High	MS08_v1_2937	ID:23318668 RNA methyltransferase, TrmH family, group 3 [Beijerinckiaceae Ms08]	0	54	12	45	12	302	1.96035e+06	2.28688e+06	588677	2.05467e+06	795730	416392		133425
High	MS08_v1_1197	ID:23316928 yfjR| Uncharacterized oxidoreductase YfjR [Beijerinckiaceae Ms08]	0	58	12	97	12	295	725463	589204	8.90432e+06	804681	1.53215e+07	1.54149e+07	2.23453e+07	1.52807e+07
High	MS08_v1_1476	ID:23317207 era| membrane-associated, 16S rRNA-binding GTPase [Beijerinckiaceae Ms08]	0	52	14	100	14	306	2.20012e+06	1.78438e+06	1.17367e+06	2.04217e+06	1.13568e+06	1.54762e+06	1.88543e+06	1.27487e+06
High	MS08_v1_2164	ID:23317895 dapF| Diaminopimelate epimerase [Beijerinckiaceae Ms08]	0	41	10	65	10	289	5.81903e+06	5.72135e+06	3.84866e+06	4.95534e+06	1.32932e+06	1.80776e+06	979197	1.06686e+06
High	MS08_v1_2074	ID:23317805 conserved protein of unknown function [Beijerinckiaceae Ms08]	0	41	11	126	11	297	5.67399e+06	4.63349e+06	4.2276e+06	6.14336e+06	1.13625e+07	1.22905e+07	1.4828e+07	1.45433e+07
High	MS08_v1_3242	ID:23318973 MFS transporter [Beijerinckiaceae Ms08]	0	20	10	59	10	559	8.85753e+06	1.02425e+07	7.67421e+06	1.1017e+07	1.31117e+06	1.13176e+06	805277	647737
High	MS08_v1_3026	ID:23318757 exported protein of unknown function [Beijerinckiaceae Ms08]	0	52	6	134	6	122	2.65261e+07	2.52593e+07	2.12783e+07	3.48476e+07	3.43554e+07	2.75184e+07	2.97778e+07	2.95575e+07
High	MS08_v1_3340	ID:23319071 ABC transporter, conserved site [Beijerinckiaceae Ms08]	0	43	14	73	14	444	4.10302e+06	4.11854e+06	2.95417e+06	3.32875e+06	2.59863e+06	1.72906e+06	2.20128e+06	2.58587e+06
High	MS08_v1_2547	ID:23318278 3-demethylubiquinone-9 3-methyltransferase [Beijerinckiaceae Ms08]	0	65	7	77	7	136	7.12327e+06	6.71246e+06	4.07767e+06	6.31641e+06	8.52397e+06	8.50865e+06	9.39861e+06	1.03424e+07
High	MS08_v1_3067	ID:23318798 conserved exported protein of unknown function [Beijerinckiaceae Ms08]	0	49	13	64	13	397	6.17886e+06	6.37369e+06	1.86193e+06	5.56319e+06	2.80976e+06	3.73359e+06	3.58556e+06	2.72638e+06
High	MS08_v1_2811	ID:23318542 Glutathione S-transferase domain protein [Beijerinckiaceae Ms08]	0	49	9	57	9	230	7.16295e+06	7.85076e+06	1.12377e+06	6.42495e+06	50654.9	124415	140803
High	MS08_v1_2502	ID:23318233 putative outer-membrane immunogenic protein [Beijerinckiaceae Ms08]	0	32	6	125	4	272	1.18099e+07	9.13172e+06	2.13661e+07	1.8815e+07	2.04852e+07	5.83694e+06	3.7471e+07	1.14635e+07
High	MS08_v1_1800	ID:23317531 CRISPR-associated protein, Csd1 family [Beijerinckiaceae Ms08]	0	31	16	105	16	584	3.62602e+06	3.95302e+06	4.27086e+06	7.00576e+06	4.10626e+06	4.36342e+06	8.65628e+06	5.26077e+06
High	MS08_v1_0353	ID:23316084 conserved protein of unknown function [Beijerinckiaceae Ms08]	0	73	5	58	5	78	8.85795e+06	9.56615e+06	5.30222e+06	6.84603e+06	2.35223e+06	2.23395e+06	1.71807e+06	1.65359e+06
High	MS08_v1_1064	ID:23316795 Uncharacterized RNA pseudouridine synthase RBE_0321 (modular protein) [Beijerinckiaceae Ms08]	0	34	16	84	16	570	3.17178e+06	3.61681e+06	1.03176e+06	2.99565e+06	3.1907e+06	3.3895e+06	3.05352e+06	3.34907e+06
High	MS08_v1_2903	ID:23318634 mraW| S-adenosyl-dependent methyltransferase activity on membrane-located substrates [Beijerinckiaceae Ms08]	0	52	17	77	17	346	2.28797e+06	1.90291e+06	754054	2.87133e+06	2.08204e+06	1.74657e+06	1.53951e+06	1.95154e+06
High	MS08_v1_1488	ID:23317219 pyrB| Aspartate carbamoyltransferase [Beijerinckiaceae Ms08]	0	42	11	67	11	316	3.06055e+06	3.9622e+06	1.48391e+06	3.769e+06	3.21752e+06	3.1202e+06	3.0064e+06	3.71208e+06
High	MS08_v1_2040	ID:23317771 hslV| peptidase component of the HslUV protease [Beijerinckiaceae Ms08]	0	42	6	125	6	190	1.05846e+07	8.81837e+06	6.40704e+06	7.10968e+06	1.70335e+07	1.71417e+07	2.00295e+07	2.50417e+07
High	MS08_v1_3220	ID:23318951 conserved protein of unknown function [Beijerinckiaceae Ms08]	0	35	13	89	13	431	3.05594e+06	2.60175e+06	2.66667e+06	4.37595e+06	2.45299e+06	2.08405e+06	1.73633e+06	2.00372e+06
High	MS08_v1_1628	ID:23317359 coxS| Carbon monoxide dehydrogenase small chain [Beijerinckiaceae Ms08]	0	63	8	85	8	166	305863	323655		251343	8.10296e+07	6.93615e+07	9.37216e+07	8.59601e+07
High	MS08_v1_1690	ID:23317421 Non-ribosomal peptide synthetase [Beijerinckiaceae Ms08]	0	21	21	56	21	1358	1.31339e+06	2.09099e+06	100772	1.47246e+06	623238	292716	603813	381963
High	MS08_v1_0111	ID:23315842 Metallophosphoesterase [Beijerinckiaceae Ms08]	0	50	10	49	10	246	2.96686e+06	2.92103e+06	1.59992e+06	2.75707e+06	762521	1.07334e+06	830331	862421
High	MS08_v1_0090	ID:23315821 conserved exported protein of unknown function [Beijerinckiaceae Ms08]	0	45	10	103	10	264	7.82421e+06	7.92139e+06	2.97452e+06	5.88399e+06	9.09104e+06	7.95561e+06	1.11604e+07	8.81693e+06
High	MS08_v1_0792	ID:23316523 yjbJ| putative stress response protein [Beijerinckiaceae Ms08]	0	62	8	265	8	65	1.84076e+06	2.20929e+06	1.62692e+06	2.97704e+06	3.56591e+08	3.7043e+08	4.48128e+08	4.47874e+08
High	MS08_v1_1747	ID:23317478 proB| gamma-glutamate kinase [Beijerinckiaceae Ms08]	0	42	14	70	14	399	2.954e+06	2.80401e+06	1.19773e+06	2.62018e+06	1.4031e+06	1.55368e+06	1.98267e+06	1.03746e+06
High	MS08_v1_1913	ID:23317644 putative transcriptional regulatory protein Bind_0345 [Beijerinckiaceae Ms08]	0	43	8	82	8	248	8.57719e+06	7.31716e+06	2.6354e+06	6.63009e+06	2.70378e+06	4.3268e+06	3.9406e+06	4.28254e+06
High	MS08_v1_1758	ID:23317489 protein of unknown function [Beijerinckiaceae Ms08]	0	54	9	54	9	224	1.43881e+07	1.27729e+07	1.01117e+07	1.29354e+07	2.81781e+06	2.77273e+06	2.16896e+06	2.94172e+06
High	MS08_v1_1085	ID:23316816 exported protein of unknown function [Beijerinckiaceae Ms08]	0	19	5	87	5	248	8.07784e+06	5.77587e+06	7.13456e+06	4.86888e+06	5.48125e+07	8.44065e+07	6.92409e+07	8.26158e+07
High	MS08_v1_2515	ID:23318246 ku| Non-homologous end joining protein Ku [Beijerinckiaceae Ms08]	0	46	13	79	13	301	474560	591376	612444	515777	1.20164e+07	1.35315e+07	1.15785e+07	1.36065e+07
High	MS08_v1_1093	ID:23316824 Phospholipid/glycerol acyltransferase [Beijerinckiaceae Ms08]	0	46	11	71	11	254	5.38632e+06	4.96084e+06	2.64289e+06	3.33084e+06	415141	913973	830625	279035
High	MS08_v1_0683	ID:23316414 6-phosphogluconate dehydrogenase related protein [Beijerinckiaceae Ms08]	0	31	10	92	10	338	4.11303e+06	5.61749e+06	1.51438e+07	8.46999e+06	1.38248e+07	1.53099e+07	1.31599e+07	2.48229e+07
High	MS08_v1_2114	ID:23317845 Ferric uptake regulator, Fur family [Beijerinckiaceae Ms08]	0	64	8	62	8	151	9.84348e+06	5.66051e+06	1.36674e+06	2.34133e+06	1.19546e+06	1.1182e+06	2.21845e+06	790089
High	MS08_v1_3419	ID:23319150 conserved protein of unknown function [Beijerinckiaceae Ms08]	0	39	12	81	12	360	7.70193e+06	7.59342e+06	5.01613e+06	5.49779e+06	801484	1.19587e+06	1.48332e+06	1.12859e+06
High	MS08_v1_3141	ID:23318872 hetN| Ketoacyl reductase HetN [Beijerinckiaceae Ms08]	0	50	12	142	12	275	2.15688e+06	1.94487e+06	1.36285e+06	2.5597e+06	1.91184e+07	2.18238e+07	2.13752e+07	2.17174e+07
High	MS08_v1_0629	ID:23316360 Lipoprotein releasing system, transmembrane protein, LolC/E family [Beijerinckiaceae Ms08]	0	24	9	74	9	421	5.58978e+06	5.27476e+06	3.04546e+06	4.8982e+06	1.05468e+06	830664	870634	852199
High	MS08_v1_0411	ID:23316142 accD| acetyl-CoA carboxylase, beta (carboxyltranferase) subunit [Beijerinckiaceae Ms08]	0	42	11	130	11	289	1.08854e+07	8.6413e+06	4.97725e+06	8.04982e+06	8.20214e+06	9.23128e+06	1.17608e+07	1.07734e+07
High	MS08_v1_0202	ID:23315933 mopA| Molybdenum-pterin-binding protein MopA [Beijerinckiaceae Ms08]	0	71	12	111	12	244	2.4555e+06	2.07861e+06	5.38094e+06	4.24359e+06	1.45258e+07	1.75166e+07	1.24533e+07	1.75333e+07
High	MS08_v1_0414	ID:23316145 Fmu (Sun) domain protein [Beijerinckiaceae Ms08]	0	39	15	69	15	430	2.47262e+06	2.49293e+06	613631	2.21588e+06	1.28767e+06	377678	1.35742e+06	780299
High	MS08_v1_2809	ID:23318540 Transglutaminase domain protein [Beijerinckiaceae Ms08]	0	57	12	63	12	292	2.2466e+06	2.26024e+06	1.1521e+06	2.2822e+06	2.80755e+06	2.88452e+06	2.1648e+06	2.40196e+06
High	MS08_v1_1453	ID:23317184 ispB| Octaprenyl-diphosphate synthase [Beijerinckiaceae Ms08]	0	41	10	49	10	337	5.24621e+06	5.04371e+06	2.70562e+06	5.40853e+06	32685.2	645995	518090	215839
High	MS08_v1_1710	ID:23317441 pqqB| Coenzyme PQQ synthesis protein B [Beijerinckiaceae Ms08]	0	41	10	91	10	298	8.66417e+06	7.8838e+06	7.64349e+06	6.97678e+06	6.86658e+06	8.75263e+06	7.73038e+06	1.32363e+07
High	MS08_v1_1873	ID:23317604 conserved exported protein of unknown function [Beijerinckiaceae Ms08]	0	54	7	97	7	161	1.89422e+07	1.61226e+07	1.43652e+07	1.65001e+07	3.40391e+07	3.81613e+07	2.72175e+07	3.27392e+07
High	MS08_v1_0080	ID:23315811 cydA| cytochrome d terminal oxidase, polypeptide subunit I [Beijerinckiaceae Ms08]	0	22	9	84	9	523	2.78498e+06	3.17239e+06	2.02383e+06	3.84407e+06	4.42764e+06	3.53128e+06	4.17624e+06	3.4064e+06
High	MS08_v1_2466	ID:23318197 map| methionine aminopeptidase [Beijerinckiaceae Ms08]	0	56	12	66	12	275	3.10763e+06	2.78357e+06	1.22093e+06	3.66346e+06	881683	963838	2.3388e+06	1.21925e+06
High	MS08_v1_2865	ID:23318596 glgB| 1,4-alpha-glucan branching enzyme [Beijerinckiaceae Ms08]	0	34	20	88	20	747	2.98755e+06	2.48381e+06	1.19693e+06	2.68653e+06	7.43963e+06	7.14147e+06	7.42556e+06	6.2598e+06
High	MS08_v1_3260	ID:23318991 conserved exported protein of unknown function [Beijerinckiaceae Ms08]	0	21	5	107	5	276	5.10014e+07	3.61481e+07	2.72835e+07	3.88539e+07	2.13064e+07	2.15806e+07	1.29273e+07	1.40637e+07
High	MS08_v1_2507	ID:23318238 fumC| fumarate hydratase (fumarase C),aerobic Class II [Beijerinckiaceae Ms08]	0	30	12	109	12	467	2.10468e+06	2.00864e+06	1.68732e+06	3.58881e+06	1.11597e+07	1.43557e+07	1.73542e+07	1.38905e+07
High	MS08_v1_1410	ID:23317141 cmk| cytidylate kinase [Beijerinckiaceae Ms08]	0	55	10	59	10	217	2.85339e+06	3.10701e+06	1.33074e+06	4.76978e+06	1.24782e+06	1.36182e+06	1.85421e+06	1.07956e+06
High	MS08_v1_2330	ID:23318061 conserved exported protein of unknown function [Beijerinckiaceae Ms08]	0	46	11	109	11	250	5.63868e+06	4.80556e+06	5.24042e+06	5.78756e+06	1.83693e+07	2.32202e+07	2.85597e+07	2.34621e+07
High	MS08_v1_2913	ID:23318644 murB| UDP-N-acetylenolpyruvoylglucosamine reductase [Beijerinckiaceae Ms08]	0	60	16	66	16	317	3.34258e+06	4.04578e+06	3.95697e+06	3.88844e+06	473171	1.81282e+06	403698	2.64401e+06
High	MS08_v1_1299	ID:23317030 nadC| putative nicotinate-nucleotide pyrophosphorylase [carboxylating] [Beijerinckiaceae Ms08]	0	46	12	101	12	284	4.19013e+06	3.76448e+06	1.19925e+06	2.59155e+06	2.82679e+06	2.48292e+06	4.45734e+06	2.76317e+06
High	MS08_v1_2267	ID:23317998 conserved protein of unknown function [Beijerinckiaceae Ms08]	0	49	13	66	13	335	2.16518e+06	2.51422e+06	2.35919e+06	2.35503e+06	2.9499e+06	3.22349e+06	2.6672e+06	3.41279e+06
High	MS08_v1_2264	ID:23317995 bdhA| D-beta-hydroxybutyrate dehydrogenase [Beijerinckiaceae Ms08]	0	42	10	73	10	259	1.03148e+07	9.84114e+06	5.35712e+06	7.90887e+06	3.2838e+06	4.10671e+06	4.4102e+06	3.60481e+06
High	MS08_v1_2189	ID:23317920 ruvB| ATP-dependent DNA helicase, component of RuvABC resolvasome [Beijerinckiaceae Ms08]	0	44	13	53	13	349	3.34964e+06	2.9442e+06	2.54699e+06	3.28116e+06	598605	653785	984157	474758
High	MS08_v1_3274	ID:23319005 conserved protein of unknown function [Beijerinckiaceae Ms08]	0	60	13	83	13	265	1.76145e+06	1.27622e+06	366568	1.31174e+06	8.45067e+06	9.36336e+06	8.96734e+06	7.12685e+06
High	MS08_v1_2326	ID:23318057 NAD-dependent formate dehydrogenase [Beijerinckiaceae Ms08]	0	80	7	61	7	83	6.89602e+06	7.8356e+06	2.67625e+06	7.11721e+06	1.21273e+06	1.3588e+06	2.99921e+06	1.28666e+06
High	MS08_v1_0388	ID:23316119 Glutaredoxin [Beijerinckiaceae Ms08]	0	51	6	136	6	112	2.39111e+07	2.32267e+07	1.63544e+07	2.33525e+07	3.1891e+07	4.77737e+07	3.9665e+07	3.48938e+07
High	MS08_v1_2788	ID:23318519 nqo| NADH-quinone oxidoreductase chain 12 [Beijerinckiaceae Ms08]	0	12	8	111	8	678	1.07571e+07	1.1717e+07	6.46992e+06	9.37387e+06	4.98867e+06	3.27122e+06	3.44185e+06	3.12853e+06
High	MS08_v1_1971	ID:23317702 conserved exported protein of unknown function [Beijerinckiaceae Ms08]	0	50	10	94	10	267	2.32541e+06	2.33427e+06	1.70882e+06	2.58585e+06	1.46987e+07	2.0275e+07	1.66753e+07	1.98864e+07
High	MS08_v1_2519	ID:23318250 Ste24 endopeptidase [Beijerinckiaceae Ms08]	0	29	11	135	11	409	7.40607e+06	8.64092e+06	9.50347e+06	6.17834e+06	1.03539e+07	1.07006e+07	8.90195e+06	5.96372e+06
High	MS08_v1_0319	ID:23316050 putative enzyme [Beijerinckiaceae Ms08]	0	29	11	94	11	331	7.26337e+06	7.53483e+06	3.07732e+06	5.71343e+06	4.977e+06	5.26182e+06	4.78035e+06	5.24223e+06
High	MS08_v1_3152	ID:23318883 protein of unknown function [Beijerinckiaceae Ms08]	0	30	17	57	17	762	3.88467e+06	3.33951e+06	2.85173e+06	4.08698e+06	1.29474e+06	1.42285e+06	1.69227e+06	949497
High	MS08_v1_1349	ID:23317080 O-succinylbenzoate--CoA ligase [Beijerinckiaceae Ms08]	0	30	13	52	13	507	2.71349e+06	2.41266e+06	821387	1.93618e+06	444860	380561	561985	637041
High	MS08_v1_3069	ID:23318800 conserved protein of unknown function [Beijerinckiaceae Ms08]	0	62	9	61	9	168	4.29136e+06	4.10626e+06	4.16478e+06	5.86427e+06		146620	143624
High	MS08_v1_1700	ID:23317431 Pyrroline-5-carboxylate reductase [Beijerinckiaceae Ms08]	0	41	9	89	9	274	6.60159e+06	6.35731e+06	4.12065e+06	8.50138e+06	5.18028e+06	5.59665e+06	5.13218e+06	6.98968e+06
High	MS08_v1_2835	ID:23318566 sucD| succinyl-CoA synthetase alpha chain [Beijerinckiaceae Ms08]	0	45	11	126	11	294	7.9628e+06	7.70533e+06	5.54198e+06	7.1582e+06	2.1837e+06	3.87219e+06	5.12986e+06	2.909e+06
High	MS08_v1_1152	ID:23316883 yejF| Uncharacterized ABC transporter ATP-binding protein YejF [Beijerinckiaceae Ms08]	0	41	16	75	16	537	1.5087e+06	1.49187e+06	286051	1.55931e+06	2.7799e+06	2.96215e+06	3.67352e+06	2.21143e+06
High	MS08_v1_2393	ID:23318124 putative GDP-mannose 4,6-dehydratase [Beijerinckiaceae Ms08]	0	47	15	75	15	319	4.57133e+06	3.66234e+06	3.94213e+06	4.32592e+06	758128	497445	1.21656e+06	1.11681e+06
High	MS08_v1_2521	ID:23318252 conserved protein of unknown function [Beijerinckiaceae Ms08]	0	58	8	99	8	184	6.22875e+06	5.23135e+06	2.35792e+06	4.4601e+06	7.95398e+06	9.48874e+06	7.43864e+06	7.24184e+06
High	MS08_v1_2821	ID:23318552 putative Uncharacterized outer-membrane protein y4mB [Beijerinckiaceae Ms08]	0	23	4	70	4	241	5.43133e+06	4.86377e+06	1.22004e+07	8.80154e+06	6.62189e+06	1.1366e+07	2.92308e+07	1.5125e+07
High	MS08_v1_2084	ID:23317815 ompR| DNA-binding response regulator in two-component regulatory system with EnvZ [Beijerinckiaceae Ms08]	0	46	10	44	10	246	3.83713e+06	3.29725e+06	2.53122e+06	4.24856e+06		102294
High	MS08_v1_1932	ID:23317663 conserved protein of unknown function [Beijerinckiaceae Ms08]	0	76	5	59	5	89	1.41362e+07	1.12838e+07	7.91137e+06	1.02434e+07	1.37973e+06	2.03464e+06	1.77164e+06	1.40333e+06
High	MS08_v1_2070	ID:23317801 Lignostilbene-alpha/beta-dioxygenase [Beijerinckiaceae Ms08]	0	36	13	88	13	470	3.3161e+07	2.66754e+07	2.81907e+08	1.94359e+07	9.18018e+07	6.14085e+07	9.13242e+07	1.48067e+08
High	MS08_v1_0540	ID:23316271 mopIII| Molybdenum-pterin-binding protein 3 [Beijerinckiaceae Ms08]	0	59	4	130	4	68	3.60737e+07	3.53272e+07	6.34252e+07	3.55868e+07	6.58204e+07	5.25804e+07	6.80562e+07	6.43622e+07
High	MS08_v1_1966	ID:23317697 dnaA| Chromosomal replication initiator protein DnaA [Beijerinckiaceae Ms08]	0	35	14	46	14	513	1.60049e+06	1.34573e+06	519021	1.56775e+06	162184	90062.9	72845.8	204488
High	MS08_v1_3202	ID:23318933 FAD-dependent pyridine nucleotide-disulphide oxidoreductase [Beijerinckiaceae Ms08]	0	43	15	56	15	432	1.54607e+06	1.62253e+06	642826	1.68026e+06	59010.1	53887.6	84594.4	63695.2
High	MS08_v1_3027	ID:23318758 Carboxymuconolactone decarboxylase [Beijerinckiaceae Ms08]	0	68	10	91	10	184	4.42149e+06	3.66985e+06	5.69268e+06	3.65731e+06	5.61681e+06	7.78446e+06	1.23887e+07	9.36939e+06
High	MS08_v1_0404	ID:23316135 protein of unknown function [Beijerinckiaceae Ms08]	0	40	10	56	10	261	4.92803e+06	6.02062e+06	2.19513e+06	5.49131e+06	3.54603e+06	2.79275e+06	2.12602e+06	2.40057e+06
High	MS08_v1_1515	ID:23317246 Two component transcriptional regulator, LuxR family [Beijerinckiaceae Ms08]	0	56	9	72	9	211	5.29175e+06	5.37416e+06	1.96709e+06	4.10522e+06	6.24823e+06	7.55688e+06	7.54996e+06	8.39377e+06
High	MS08_v1_1931	ID:23317662 ErfK/YbiS/YcfS/YnhG family protein [Beijerinckiaceae Ms08]	0	59	8	109	8	182	1.2611e+06	959688	1.27488e+06	3.08248e+06	1.31467e+07	1.24418e+07	1.41697e+07	1.06431e+07
High	MS08_v1_2162	ID:23317893 Transcription activator effector binding [Beijerinckiaceae Ms08]	0	36	7	123	7	230	2.18855e+07	2.04873e+07	2.42029e+07	2.95459e+07	2.62537e+07	3.07589e+07	3.57544e+07	3.60429e+07
High	MS08_v1_1088	ID:23316819 2-deoxyglucose-6-phosphate phosphatase 1 [Beijerinckiaceae Ms08]	0	54	8	76	8	225	5.50132e+06	5.29414e+06	4.04014e+06	5.38503e+06	4.56329e+06	4.18885e+06	7.29322e+06	5.40432e+06
High	MS08_v1_3300	ID:23319031 putative molybdenum-pterin-binding protein [Beijerinckiaceae Ms08]	0	71	4	70	4	69	1.4696e+07	1.41021e+07	1.4089e+07	1.17041e+07	2.32533e+07	1.84655e+07	2.27406e+07	1.91076e+07
High	MS08_v1_2919	ID:23318650 putative cytochrome c protein [Beijerinckiaceae Ms08]	0	43	8	121	8	176	3.20461e+07	3.648e+07	1.21965e+07	3.53386e+07	1.29301e+07	5.00627e+07	4.02356e+07	4.07054e+07
High	MS08_v1_3222	ID:23318953 NADPH-dependent FMN reductase [Beijerinckiaceae Ms08]	0	53	7	85	7	192	3.46734e+06	2.3528e+06	1.91904e+06	2.0995e+06	9.2208e+06	1.14539e+07	1.51651e+07	1.06861e+07
High	MS08_v1_1478	ID:23317209 gmk| guanylate kinase [Beijerinckiaceae Ms08]	0	54	10	96	10	228	5.66318e+06	5.39179e+06	1.84303e+06	4.45939e+06	3.56824e+06	3.48895e+06	4.3301e+06	4.17552e+06
High	MS08_v1_3334	ID:23319065 conserved exported protein of unknown function [Beijerinckiaceae Ms08]	0	48	3	157	3	113	1.18698e+08	1.25161e+08	8.6416e+07	1.21537e+08	1.35751e+08	1.17218e+08	8.40801e+07	1.29215e+08
High	MS08_v1_3198	ID:23318929 Pseudouridine synthase [Beijerinckiaceae Ms08]	0	44	14	106	14	350	4.15528e+06	3.48879e+06	1.2866e+06	3.81433e+06	3.9756e+06	3.61451e+06	3.86991e+06	2.23689e+06
High	MS08_v1_1304	ID:23317035 yraL| putative methyltransferase [Beijerinckiaceae Ms08]	0	46	11	55	11	333	1.26956e+06	965576	174177	1.28722e+06	2.6948e+06	2.56692e+06	2.45839e+06	3.12191e+06
High	MS08_v1_0812	ID:23316543 Ribonuclease T2 (fragment) [Beijerinckiaceae Ms08]	0	39	8	65	8	232	4.21496e+06	3.31013e+06	3.18086e+06	5.54953e+06	1.00884e+06	1.20437e+06	692523	664346
High	MS08_v1_2031	ID:23317762 FAD linked oxidase domain protein [Beijerinckiaceae Ms08]	0	41	14	66	14	399	1.20141e+06	1.25615e+06	895942	2.08078e+06	1.32601e+06	1.88139e+06	2.01452e+06	1.44489e+06
High	MS08_v1_0685	ID:23316416 ROK family protein [Beijerinckiaceae Ms08]	0	52	10	101	10	256	1.11472e+06	1.05411e+06	1.07014e+06	1.11483e+06	1.50644e+07	1.68017e+07	1.67599e+07	2.13017e+07
High	MS08_v1_0188	ID:23315919 yagS| putative oxidoreductase with FAD-binding domain [Beijerinckiaceae Ms08]	0	58	13	95	13	342	1.44293e+06	1.52686e+06	961143	2.95394e+06	6.32181e+06	7.29607e+06	7.26524e+06	8.08302e+06
High	MS08_v1_1216	ID:23316947 psd| Phosphatidylserine decarboxylase proenzyme [Beijerinckiaceae Ms08]	0	38	9	109	9	232	1.06302e+07	1.10168e+07	7.06203e+06	8.40123e+06	5.19434e+07	3.14245e+07	4.36664e+07	3.1307e+07
High	MS08_v1_2209	ID:23317940 PTS system fructose subfamily IIA component [Beijerinckiaceae Ms08]	0	58	7	109	7	133	8.62552e+06	8.36617e+06	3.91261e+06	7.27305e+06	9.96874e+06	1.00998e+07	1.08439e+07	9.84327e+06
High	MS08_v1_1397	ID:23317128 putative Glycosyl transferase, group 2 family protein [Beijerinckiaceae Ms08]	0	38	11	70	11	304	7.78754e+06	8.92967e+06	1.81237e+06	8.38617e+06	2.54743e+06	856584	1.40581e+06	539650
High	MS08_v1_3047	ID:23318778 Amidase [Beijerinckiaceae Ms08]	0	42	15	64	15	484	2.34961e+07	2.79567e+07	3.07264e+07	2.64558e+07	1.22522e+07	1.36552e+07	1.0085e+07	1.44112e+07
High	MS08_v1_2292	ID:23318023 rbbA| fused ribosome-associated ATPase: ATP-binding protein ; ATP-binding protein ; putative membrane protein [Beijerinckiaceae Ms08]	0	23	18	75	18	910	507928	483288		518192	3.02569e+06	3.38581e+06	2.96788e+06	2.32266e+06
High	MS08_v1_2266	ID:23317997 Patatin [Beijerinckiaceae Ms08]	0	42	12	58	12	395	4.06011e+06	4.00355e+06	2.67485e+06	3.14196e+06			63587.3
High	MS08_v1_3393	ID:23319124 Heavy metal translocating P-type ATPase (modular protein) [Beijerinckiaceae Ms08]	0	17	17	90	8	1207	3.00012e+06	2.2958e+06	1.5837e+06	2.89761e+06	5.86747e+06	4.68156e+06	3.85063e+06	4.94944e+06
High	MS08_v1_0064	ID:23315795 thiO| putative thiamine biosynthesis oxidoreductase ThiO [Beijerinckiaceae Ms08]	0	36	11	59	11	336	2.15165e+06	2.23883e+06	353984	1.2725e+06	1.53991e+06	2.14306e+06	2.2448e+06	1.63266e+06
High	MS08_v1_0557	ID:23316288 conserved protein of unknown function [Beijerinckiaceae Ms08]	0	46	7	57	7	196	5.17436e+06	5.17542e+06	5.846e+06	3.72805e+06	3.78745e+06	3.34534e+06	4.2999e+06	1.88895e+06
High	MS08_v1_2111	ID:23317842 exported protein of unknown function [Beijerinckiaceae Ms08]	0	36	3	76	3	150	2.53755e+06	1.69776e+06	1.91143e+06	2.72838e+06	1.99069e+07	3.52973e+07	4.01948e+07	3.18029e+07
High	MS08_v1_2017	ID:23317748 conserved protein of unknown function [Beijerinckiaceae Ms08]	0	44	17	67	17	514	1.74397e+06	1.8528e+06	2.01293e+06	2.95721e+06	1.62945e+06	2.26263e+06	2.43545e+06	2.27728e+06
High	MS08_v1_2671	ID:23318402 ErfK/YbiS/YcfS/YnhG family protein (modular protein) [Beijerinckiaceae Ms08]	0	55	10	123	10	198	1.00664e+07	9.70719e+06	1.72867e+07	1.69234e+07	6.5248e+06	7.43098e+06	1.20145e+07	6.80349e+06
High	MS08_v1_2810	ID:23318541 membrane protein of unknown function [Beijerinckiaceae Ms08]	0	33	13	99	13	458	3.0079e+06	3.15778e+06	6.99097e+06	6.504e+06	5.42716e+06	2.23224e+07	2.92489e+06	4.44972e+06
High	MS08_v1_1748	ID:23317479 proA| Gamma-glutamyl phosphate reductase [Beijerinckiaceae Ms08]	0	36	14	68	14	432	2.05236e+06	2.26519e+06	1.42053e+06	2.68614e+06	1.92991e+06	2.24612e+06	2.42014e+06	1.99672e+06
High	MS08_v1_2254	ID:23317985 conserved exported protein of unknown function [Beijerinckiaceae Ms08]	0	32	6	78	6	173	8.94127e+06	8.89644e+06	7.11265e+06	9.66672e+06	3.77575e+06	4.34612e+06	3.83223e+06	3.02394e+06
High	MS08_v1_1009	ID:23316740 conserved exported protein of unknown function [Beijerinckiaceae Ms08]	0	49	10	42	10	308	2.70051e+06	2.83809e+06	3.09592e+06	4.40835e+06	699475	838269	419902	476860
High	MS08_v1_3343	ID:23319074 exported protein of unknown function [Beijerinckiaceae Ms08]	0	40	5	80	5	196	1.46658e+07	1.42449e+07	1.00791e+07	1.22435e+07	1.22051e+06	1.32946e+06	1.0983e+06	711391
High	MS08_v1_1884	ID:23317615 rpmB| 50S ribosomal protein L28 [Beijerinckiaceae Ms08]	0	63	6	103	6	96	4.80615e+07	4.9854e+07	4.53751e+07	6.61136e+07	2.31308e+07	2.74852e+07	2.24431e+07	2.76448e+07
High	MS08_v1_3344	ID:23319075 ygaF| putative enzyme [Beijerinckiaceae Ms08]	0	41	12	41	12	399	1.57495e+06	1.24268e+06	223948	826269		96956	392522
High	MS08_v1_0900	ID:23316631 Methylmalonyl-CoA mutase [Beijerinckiaceae Ms08]	0	33	18	98	18	612	2.02396e+06	1.57412e+06	1.40998e+06	2.18288e+06	4.2828e+06	4.69772e+06	2.39543e+06	4.20266e+06
High	MS08_v1_1975	ID:23317706 Histidinol-phosphate phosphatase [Beijerinckiaceae Ms08]	0	46	10	51	10	265	6.64707e+06	5.86138e+06	5.51002e+06	7.1475e+06	3.56224e+06	3.31096e+06	2.65282e+06	2.76873e+06
High	MS08_v1_1131	ID:23316862 hemF| Coproporphyrinogen-III oxidase, aerobic [Beijerinckiaceae Ms08]	0	33	9	67	9	298	4.02211e+06	3.68357e+06	1.04531e+06	3.06834e+06	1.40122e+06	2.56024e+06	3.2735e+06	1.93329e+06
High	MS08_v1_0521	ID:23316252 putative aromatic amino acid degradation protein, fumarylacetoacetate hydrolase family protein [Beijerinckiaceae Ms08]	0	41	10	102	10	341	2.29485e+06	1.72725e+06	2.72588e+06	3.2639e+06	3.86613e+06	5.14092e+06	5.63733e+06	5.71086e+06
High	MS08_v1_3038	ID:23318769 coxN| Alternative cytochrome c oxidase subunit 1 [Beijerinckiaceae Ms08]	0	16	7	115	7	591	8.46701e+06	7.91868e+06	8.35431e+06	1.20865e+07	1.31623e+07	1.20157e+07	8.06776e+06	1.30183e+07
High	MS08_v1_1737	ID:23317468 conserved protein of unknown function [Beijerinckiaceae Ms08]	0	52	11	107	11	250	5.02634e+06	4.62828e+06	4.24049e+06	5.36343e+06	6.37819e+06	5.44835e+06	6.82179e+06	5.54733e+06
High	MS08_v1_0406	ID:23316137 apaG| Protein ApaG [Beijerinckiaceae Ms08]	0	59	4	44	4	130	6.55691e+06	6.26138e+06	4.91913e+06	5.79509e+06	2.84804e+06	3.53838e+06	2.06115e+06	2.71102e+06
High	MS08_v1_0266	ID:23315997 Isovaleryl-CoA dehydrogenase, mitochondrial [Beijerinckiaceae Ms08]	0	42	12	62	12	386	1.85689e+06	1.82073e+06	1.49955e+06	1.94187e+06	2.30721e+06	2.8069e+06	2.48332e+06	2.85725e+06
High	MS08_v1_0564	ID:23316295 ribE| riboflavin synthase beta chain [Beijerinckiaceae Ms08]	0	58	8	60	8	163	2.27102e+06	2.22445e+06	1.67966e+06	2.28124e+06	433399	420382	658336	482558
High	MS08_v1_1824	ID:23317555 ndk| multifunctional nucleoside diphosphate kinase and apyrimidinic endonuclease and 3'-phosphodiesterase [Beijerinckiaceae Ms08]	0	33	5	149	5	144	3.85854e+07	3.50332e+07	2.28578e+07	3.02226e+07	1.89477e+07	2.55488e+07	2.33986e+07	2.7551e+07
High	MS08_v1_0331	ID:23316062 conserved protein of unknown function [Beijerinckiaceae Ms08]	0	41	7	52	7	195	6.52184e+06	5.27924e+06	4.14861e+06	6.43726e+06	426875	405690	1.50996e+06	704938
High	MS08_v1_2322	ID:23318053 NADH dehydrogenase (Ubiquinone) 24 kDa subunit [Beijerinckiaceae Ms08]	0	46	6	67	6	158	8.97965e+06	9.08745e+06	4.64685e+06	8.29297e+06	1.46747e+06	2.45569e+06	3.80322e+06	2.26216e+06
High	MS08_v1_1127	ID:23316858 Transcriptional regulator, LysR family [Beijerinckiaceae Ms08]	0	53	11	64	11	295	1.53494e+06	1.8682e+06	1.31925e+06	2.1772e+06	2.00688e+06	2.05598e+06	2.5036e+06	2.21564e+06
High	MS08_v1_0752	ID:23316483 dnaB| Replicative DNA helicase [Beijerinckiaceae Ms08]	0	37	15	40	15	502	1.36815e+06	1.41205e+06	114527	2.10366e+06
High	MS08_v1_3090	ID:23318821 Glutathione S-transferase domain [Beijerinckiaceae Ms08]	0	50	10	107	10	239	3.05475e+06	2.70171e+06	1.34465e+06	2.44688e+06	1.93439e+07	2.07234e+07	3.05473e+07	2.66513e+07
High	MS08_v1_0179	ID:23315910 conserved protein of unknown function [Beijerinckiaceae Ms08]	0	74	4	94	4	73	5.24117e+06	5.86096e+06	4.2361e+06	8066436	4.29365e+06	5.41756e+06	6.54634e+06	4.66427e+06
High	MS08_v1_0918	ID:23316649 cusR| Transcriptional regulatory protein CusR [Beijerinckiaceae Ms08]	0	52	10	105	10	230	4.21047e+06	3.27278e+06	2.12978e+06	4.01564e+06	7.10616e+06	8.09184e+06	1.78495e+07	1.03715e+07
High	MS08_v1_0496	ID:23316227 NAD-dependent epimerase/dehydratase [Beijerinckiaceae Ms08]	0	51	16	119	16	332	1.97518e+06	1.81922e+06	1.62415e+06	2.40055e+06	6.11905e+06	6.74784e+06	7.87024e+06	7.95047e+06
High	MS08_v1_3188	ID:23318919 conserved exported protein of unknown function [Beijerinckiaceae Ms08]	0	59	7	114	7	126	1.543e+06	1.28826e+06	340603	5.99657e+06	1.30718e+07	1.83815e+07	1.57318e+07	2.95799e+06
High	MS08_v1_0451	ID:23316182 rpsQ| 30S ribosomal subunit protein S17 [Beijerinckiaceae Ms08]	0	58	7	140	7	79	5.53991e+07	5.2625e+07	3.42823e+07	4.34415e+07	1.57129e+07	2.20322e+07	1.87868e+07	2.34489e+07
High	MS08_v1_2374	ID:23318105 Chorismate mutase [Beijerinckiaceae Ms08]	0	49	10	82	10	283	3.67342e+06	3.95272e+06	2.29003e+06	5.09573e+06	1.26952e+06	2.01348e+06	2.25738e+06	2.6019e+06
High	MS08_v1_2807	ID:23318538 mog| Molybdopterin adenylyltransferase [Beijerinckiaceae Ms08]	0	60	9	103	9	181	4.55478e+06	4.63335e+06	3.57593e+06	4.85724e+06	4.16217e+06	3.7557e+06	5.00773e+06	3.87685e+06
High	MS08_v1_0056	ID:23315787 conserved membrane protein of unknown function [Beijerinckiaceae Ms08]	0	24	17	67	17	867	2.97644e+06	2.76462e+06	612575	2.56238e+06	1.11353e+06	867137	1.24814e+06	551833
High	MS08_v1_2001	ID:23317732 heat shock chaperone (modular protein) [Beijerinckiaceae Ms08]	0	43	9	125	9	238	6.97191e+06	6.58212e+06	9.96417e+06	1.47159e+07	1.06356e+07	8.84323e+06	1.23961e+07	1.08485e+07
High	MS08_v1_0774	ID:23316505 Kazal-type serine protease inhibitor domain (fragment) [Beijerinckiaceae Ms08]	0	60	6	61	6	151	2.75365e+06	2.719e+06	5.45357e+06	3.7607e+06	2.98006e+07	5.99761e+07	4.04474e+07	2.61276e+07
High	MS08_v1_2567	ID:23318298 conserved exported protein of unknown function [Beijerinckiaceae Ms08]	0	53	9	52	9	279	5.27869e+06	4.56638e+06	4.40045e+06	4.44021e+06	3.00452e+06	4.619e+06	2.36106e+06	2.47084e+06
High	MS08_v1_2101	ID:23317832 Electron transport protein SCO1/SenC [Beijerinckiaceae Ms08]	0	39	6	52	6	209	1.08388e+07	9.04105e+06	4.69615e+06	5.97715e+06	744714	566861	660607	359671
High	MS08_v1_3122	ID:23318853 Histidine kinase [Beijerinckiaceae Ms08]	0	42	13	57	13	350	3.08459e+06	3.31333e+06	631708	2.53832e+06	1.36832e+06	1.48185e+06	1.77884e+06	1.40198e+06
High	MS08_v1_0100	ID:23315831 Histidine triad (HIT) protein [Beijerinckiaceae Ms08]	0	50	5	71	5	144	5.7894e+06	5.47647e+06	3.84176e+06	6.11571e+06	1.48208e+07	1.8167e+07	2.66793e+07	2.06794e+07
High	MS08_v1_2087	ID:23317818 conserved membrane protein of unknown function [Beijerinckiaceae Ms08]	0	47	13	63	13	331	4.19222e+06	5.44987e+06	1.94286e+06	4.93771e+06	724454	932144	911578	415745
High	MS08_v1_3471	ID:23319202 prfB| Peptide chain release factor 2 [Beijerinckiaceae Ms08]	0	39	13	74	13	322	2.07621e+06	2.09509e+06	1.72277e+06	3.37574e+06	1.85466e+06	1.58728e+06	2.63531e+06	2.94529e+06
High	MS08_v1_0482	ID:23316213 qseB| Transcriptional regulatory protein QseB [Beijerinckiaceae Ms08]	0	65	14	111	14	219	6.08058e+06	6.71754e+06	6.58012e+06	5.81304e+06	7.85404e+06	6.58047e+06	9.5857e+06	1.3898e+07
High	MS08_v1_0565	ID:23316296 conserved exported protein of unknown function [Beijerinckiaceae Ms08]	0	40	3	80	3	124	5.9927e+07	4.84923e+07	3.54015e+07	4.90701e+07	1.73861e+07	2.60721e+07	1.18215e+07	1.66066e+07
High	MS08_v1_1950	ID:23317681 ggt| gamma-glutamyltranspeptidase [Beijerinckiaceae Ms08]	0	30	15	60	15	592	2.05105e+06	1.52632e+06	847516	1.69822e+06	955627	900103	1.18498e+06	1.16528e+06
High	MS08_v1_0641	ID:23316372 Beta-lactamase domain protein [Beijerinckiaceae Ms08]	0	40	12	86	12	327	6.63994e+06	5.43584e+06	6.94356e+06	5.62252e+06	3.54758e+06	2.99502e+06	9.52166e+06	3.08802e+06
High	MS08_v1_1135	ID:23316866 petA| Ubiquinol-cytochrome c reductase iron-sulfur subunit [Beijerinckiaceae Ms08]	0	45	7	55	7	174	3.70429e+06	3.02901e+06	2.8723e+06	5.00411e+06	2.58482e+06	1.87232e+06	3.22207e+06	1.85582e+06
High	MS08_v1_1034	ID:23316765 yejE| putative oligopeptide transporter subunit ; permease component of ABC superfamily transporter [Beijerinckiaceae Ms08]	0	24	7	52	7	390	2.29081e+06	2.19117e+06	629323	1.80599e+06	695031	688284	982855	920019
High	MS08_v1_3063	ID:23318794 acaP| Carbonic anhydrase (Carbonate dehydratase) [Beijerinckiaceae Ms08]	0	29	5	105	5	251	1.13239e+07	1.30837e+07	1.2279e+07	1.67918e+07	1.17286e+07	1.37937e+07	9.82125e+06	9.54413e+06
High	MS08_v1_2320	ID:23318051 Transcriptional regulator, LysR family [Beijerinckiaceae Ms08]	0	55	14	92	14	299	3.00871e+06	2.88266e+06	1.49298e+06	2.89988e+06	6.73128e+06	6.61404e+06	7.08065e+06	7.41541e+06
High	MS08_v1_3427	ID:23319158 ybbA| putative transporter subunit: ATP-binding component of ABC superfamily [Beijerinckiaceae Ms08]	0	52	9	67	9	234	3.76119e+06	4.14349e+06	2.30991e+06	4.48063e+06	2.33275e+06	2.22488e+06	4.38243e+06	2.54031e+06
High	MS08_v1_0905	ID:23316636 gloA| putative lactoylglutathione lyase [Beijerinckiaceae Ms08]	0	61	8	80	8	146	3.07728e+06	3.33056e+06	2.17067e+06	4.06752e+06	1.27057e+07	1.52017e+07	7.05811e+06	1.60142e+07
High	MS08_v1_1715	ID:23317446 protein of unknown function [Beijerinckiaceae Ms08]	0	84	7	53	7	131	7.59519e+06	6.61194e+06	5.30291e+06	7.30012e+06	6.49938e+06	4.91401e+06	8.27508e+06	5.98166e+06
High	MS08_v1_3437	ID:23319168 glnB| regulatory protein P-II for glutamine synthetase [Beijerinckiaceae Ms08]	0	57	6	103	6	114	3.38546e+07	3.15799e+07	2.42059e+07	2.50977e+07	2.85977e+07	2.96908e+07	2.88185e+07	2.71612e+07
High	MS08_v1_1067	ID:23316798 purD| phosphoribosylglycinamide synthetase phosphoribosylamine-glycine ligase [Beijerinckiaceae Ms08]	0	34	11	65	11	423	656960	1.34268e+06	120115	1.14453e+06	1.08694e+06	1.10873e+06	1.28614e+06	2.0062e+06
High	MS08_v1_0904	ID:23316635 otsB| Trehalose-phosphate phosphatase [Beijerinckiaceae Ms08]	0	49	10	83	10	253	2.17732e+06	2.05793e+06	429713	1.49279e+06	6.22837e+06	7.07619e+06	9.21569e+06	9.29546e+06
High	MS08_v1_0535	ID:23316266 Methionine-R-sulfoxide reductase [Beijerinckiaceae Ms08]	0	48	6	67	6	162	3.25075e+06	3.77174e+06	1.0139e+06	4.46163e+06	2.11559e+06	2.6986e+06	3.14387e+06	2.07148e+06
High	MS08_v1_2036	ID:23317767 hisA| 1-(5-phosphoribosyl)-5-[(5-phosphoribosylamino)methylideneamino] imidazole-4-carboxamide isomerase [Beijerinckiaceae Ms08]	0	49	11	76	11	249	5.02901e+06	4.42189e+06	1.74625e+06	3.68885e+06	2.25171e+06	2.77662e+06	2.69153e+06	2.68242e+06
High	MS08_v1_0436	ID:23316167 Chromosome segregation and condensation protein, ScpB [Beijerinckiaceae Ms08]	0	40	8	45	8	257	2.51366e+06	2.84498e+06	947619	2.13232e+06	41924.8	23885		57457.9
High	MS08_v1_0232	ID:23315963 protein of unknown function [Beijerinckiaceae Ms08]	0	85	8	84	8	101	218434	218073	214038	557237	2.31123e+07	2.15487e+07	1.91138e+07	2.37789e+07
High	MS08_v1_3157	ID:23318888 ackA| Acetate kinase [Beijerinckiaceae Ms08]	0	47	14	75	14	394	7.76268e+06	7.27367e+06	5.7841e+06	9.6407e+06	6.52034e+06	5.06706e+06	5.85484e+06	4.91097e+06
High	MS08_v1_3168	ID:23318899 conserved protein of unknown function [Beijerinckiaceae Ms08]	0	64	8	182	8	154	2.85813e+07	3.08429e+07	2.16132e+07	3.1878e+07	4.58434e+07	5.9352e+07	6.60722e+07	6.42822e+07
High	MS08_v1_2922	ID:23318653 Putative pterin-4-alpha-carbinolamine dehydratase (modular protein) [Beijerinckiaceae Ms08]	0	31	6	103	6	194	2.40435e+07	2.07559e+07	1.52129e+07	1.71465e+07	2.18165e+07	2.54672e+07	2.90857e+07	3.12056e+07
High	MS08_v1_3172	ID:23318903 conserved protein of unknown function [Beijerinckiaceae Ms08]	0	56	13	157	13	215	4.56235e+06	3.83137e+06	4.35654e+06	5.18347e+06	7.02717e+07	7.80342e+07	8.64673e+07	9.03683e+07
High	MS08_v1_3062	ID:23318793 2-nitropropane dioxygenase NPD [Beijerinckiaceae Ms08]	0	29	7	29	7	321	2.20568e+06	1.91249e+06	1.04021e+06	1.47364e+06	1.2253e+06	932360	1.29337e+06	888706
High	MS08_v1_2929	ID:23318660 putative signal transduction protein with CBS domains [Beijerinckiaceae Ms08]	0	77	11	88	11	155	1.32537e+06	1.57032e+06	1.53975e+06	2.18727e+06	1.69554e+07	1.57464e+07	1.03386e+07	1.44947e+07
High	MS08_v1_3166	ID:23318897 fixL| Sensor protein FixL [Beijerinckiaceae Ms08]	0	25	13	74	13	495	3.26169e+06	2.51139e+06	855754	2.17127e+06	2.1661e+06	1.91033e+06	1.67738e+06	1.57373e+06
High	MS08_v1_1609	ID:23317340 Transcriptional regulatory protein [Beijerinckiaceae Ms08]	0	44	12	92	12	264	3.12257e+06	3.89065e+06	1.14226e+06	3.05095e+06	7.65462e+06	9.63514e+06	8.3066e+06	9.58309e+06
High	MS08_v1_1987	ID:23317718 rpsK| 30S ribosomal subunit protein S11 [Beijerinckiaceae Ms08]	0	33	4	84	4	129	2.70742e+07	2.2654e+07	1.45501e+07	2.21972e+07	1.11245e+07	1.29615e+07	1.0909e+07	1.06921e+07
High	MS08_v1_1005	ID:23316736 pyrF| Orotidine 5'-phosphate decarboxylase [Beijerinckiaceae Ms08]	0	54	10	67	10	272	2.08163e+06	1.58774e+06	755526	1.40315e+06	1.17809e+06	1.48397e+06	1.77906e+06	1.83998e+06
High	MS08_v1_1881	ID:23317612 gmd| GDP-mannose 4,6-dehydratase [Beijerinckiaceae Ms08]	0	33	9	52	9	347	2.95586e+06	2.3209e+06	509624	1.53136e+06	1.55112e+06	1.83967e+06	2.12155e+06	1.47626e+06
High	MS08_v1_1602	ID:23317333 Two component transcriptional regulator, LuxR family [Beijerinckiaceae Ms08]	0	52	9	70	9	211	6.74235e+06	6.53095e+06	1.01462e+07	4.34841e+06	5.26058e+06	7.95405e+06	8.03258e+06	9.08648e+06
High	MS08_v1_1014	ID:23316745 suhB| Inositol-1-monophosphatase [Beijerinckiaceae Ms08]	0	48	11	94	11	262	5.55756e+06	6.05198e+06	3.00417e+06	5.769e+06	3.03649e+06	4.03616e+06	3.34543e+06	2.79831e+06
High	MS08_v1_3241	ID:23318972 conserved protein of unknown function [Beijerinckiaceae Ms08]	0	78	7	80	7	116	8.04737e+06	7.21834e+06	5.34224e+06	6.15177e+06	1.09934e+07	1.34636e+07	1.33193e+07	1.31089e+07
High	MS08_v1_2354	ID:23318085 nasA| Nitrate reductase [Beijerinckiaceae Ms08]	0	20	15	52	15	894	884670	780322	939782	801571	212098	48702.2	104130
High	MS08_v1_1344	ID:23317075 Type VI secretion system OmpA/MotB family protein [Beijerinckiaceae Ms08]	0	35	16	63	16	485	4.27536e+06	4.15467e+06	2.97157e+06	3.73607e+06	476290	543365	629137	309727
High	MS08_v1_2392	ID:23318123 protein of unknown function [Beijerinckiaceae Ms08]	0	34	10	35	10	385	3.14781e+06	2.78536e+06	759539	3.28193e+06	163366	36154.1	37470.1	92789
High	MS08_v1_0684	ID:23316415 conserved protein of unknown function [Beijerinckiaceae Ms08]	0	24	17	52	17	728	159340	375067	226671	490355	6.14831e+06	5.91217e+06	4.72059e+06	6.84172e+06
High	MS08_v1_0290	ID:23316021 AAA ATPase [Beijerinckiaceae Ms08]	0	51	15	58	15	367	2.0631e+06	2.05591e+06	4.37822e+06	1.51716e+06	3.05447e+06	1.80404e+06	4.27057e+06	7.13707e+06
High	MS08_v1_2599	ID:23318330 PRC-barrel domain protein (fragment) [Beijerinckiaceae Ms08]	0	42	8	377	8	140	1.39859e+07	1.36202e+07	7.05713e+06	1.11536e+07	1.94699e+09	1.8372e+09	1.29841e+09	1.92099e+09
High	MS08_v1_3435	ID:23319166 Methyltransferase [Beijerinckiaceae Ms08]	0	39	9	39	9	288	3.94617e+06	3.32599e+06	1.79081e+06	2.74864e+06	1.19394e+06	1.40601e+06	1.7263e+06	1.33529e+06
High	MS08_v1_2898	ID:23318629 conserved protein of unknown function [Beijerinckiaceae Ms08]	0	53	13	50	13	317	2.4038e+06	2.14832e+06	303977	3.27297e+06		57495.7	56334.8	134199
High	MS08_v1_0569	ID:23316300 putative Glycosyl transferase group 1 [Beijerinckiaceae Ms08]	0	29	11	68	11	365	2.67714e+06	3.28246e+06	1.95482e+06	2457028	2.37261e+06	2.29593e+06	2.44993e+06	2.42459e+06
High	MS08_v1_1284	ID:23317015 putative TRAP transporter solute receptor, TAXI family [Beijerinckiaceae Ms08]	0	31	12	45	12	473	879453	764789	180674	1.06409e+06	227129	358045	417105	65700.7
High	MS08_v1_2688	ID:23318419 dmrA| Dihydromethanopterin reductase [Beijerinckiaceae Ms08]	0	69	9	98	9	149	1.61475e+06	1.33779e+06	877275	2.21648e+06	3.95192e+06	5.07515e+06	4.84614e+06	4.58221e+06
High	MS08_v1_1642	ID:23317373 putative multicopper oxidase [Beijerinckiaceae Ms08]	0	26	11	88	11	557	1.6656e+06	1.66512e+06	582266	1.82495e+06	6.16928e+06	5.41895e+06	6.15798e+06	5.90832e+06
High	MS08_v1_3093	ID:23318824 conserved exported protein of unknown function [Beijerinckiaceae Ms08]	0	45	16	91	16	425	3.98094e+06	3.078e+06	1.91546e+06	3.51424e+06	6.59927e+06	5.62149e+06	8.8482e+06	6.97902e+06
High	MS08_v1_1182	ID:23316913 conserved membrane protein of unknown function [Beijerinckiaceae Ms08]	0	32	13	91	13	462	3.47244e+06	3.3611e+06	942674	2.94514e+06	4.88975e+06	4.80175e+06	4.50467e+06	4.83042e+06
High	MS08_v1_0601	ID:23316332 Multicopper oxidase type 3 [Beijerinckiaceae Ms08]	0	40	13	32	13	466	1.62957e+06	1.66529e+06	519253	1.27932e+06	888914	848172	821405	449307
High	MS08_v1_2376	ID:23318107 tyrC| Protein TyrC [Beijerinckiaceae Ms08]	0	42	11	67	11	315	1.64313e+06	1.72128e+06	920680	2.13232e+06	2.19337e+06	1.62465e+06	2.8519e+06	2.37463e+06
High	MS08_v1_1403	ID:23317134 Phosphoserine phosphatase SerB [Beijerinckiaceae Ms08]	0	52	12	62	12	308	1.92463e+06	2.03209e+06	931926	2.18249e+06	942195	1.29603e+06	1.08468e+06	1.20738e+06
High	MS08_v1_2501	ID:23318232 Porin [Beijerinckiaceae Ms08]	0	34	7	120	3	265	5.73386e+06	5.96783e+06	1.58191e+07	1.25884e+07	1.33146e+07	5.2238e+06	1.84706e+07	1.39908e+07
High	MS08_v1_0960	ID:23316691 conserved protein of unknown function [Beijerinckiaceae Ms08]	0	44	13	33	13	371	746585	774926	1.06075e+06	3.37701e+06	1.61839e+06	582735	294680	271015
High	MS08_v1_0748	ID:23316479 ATP12 ATPase [Beijerinckiaceae Ms08]	0	47	11	71	11	272	1.8621e+06	1.87865e+06	883617	2.45276e+06	3.40918e+06	3.06753e+06	3.1656e+06	2.97892e+06
High	MS08_v1_0858	ID:23316589 acsA| Acetyl-coenzyme A synthetase [Beijerinckiaceae Ms08]	0	29	16	82	16	585	2.88022e+06	2.22286e+06	1.51097e+06	3.38573e+06	5.14226e+06	5.94488e+06	5.8423e+06	5.572e+06
High	MS08_v1_1559	ID:23317290 putative HD superfamily phosphohydrolase [Beijerinckiaceae Ms08]	0	29	13	56	13	474	3.10716e+06	3.07608e+06	1.7558e+06	3.14313e+06	2.51757e+06	2.21326e+06	2.31399e+06	4.95281e+06
High	MS08_v1_0719	ID:23316450 conserved protein of unknown function [Beijerinckiaceae Ms08]	0	55	8	83	8	156	4.9055e+06	4.19828e+06	2.49266e+06	2.91783e+06	1.57752e+07	1.60174e+07	2.90263e+07	1.43914e+07
High	MS08_v1_1096	ID:23316827 metF| 5,10-methylenetetrahydrofolate reductase [Beijerinckiaceae Ms08]	0	57	12	53	12	305	4.14506e+06	3.49228e+06	1.56783e+06	3.20151e+06	443749	693563	690753	546679
High	MS08_v1_2907	ID:23318638 UDP-N-acetylmuramoyl-tripeptide--D-alanyl-D-alanine ligase [Beijerinckiaceae Ms08]	0	30	12	64	12	485	4.89438e+06	4.83425e+06	1.99741e+06	4.1209e+06	1.2909e+06	932779	1.94554e+06	721495
High	MS08_v1_3048	ID:23318779 conserved membrane protein of unknown function [Beijerinckiaceae Ms08]	0	45	9	69	9	254	4.0287e+06	3.69078e+06	2.69434e+06	3.69533e+06	2.32256e+06	2.1244e+06	2.12555e+06	2.63328e+06
High	MS08_v1_1968	ID:23317699 rpsT| 30S ribosomal protein S20 [Beijerinckiaceae Ms08]	0	31	3	91	3	88	1.45618e+07	8.80228e+06	2.06996e+07	2.80142e+07	1.30574e+07	1.0078e+07	8.23207e+06	8.1201e+06
High	MS08_v1_2412	ID:23318143 mdtC| multidrug efflux system, subunit C [Beijerinckiaceae Ms08]	0	17	16	42	15	1104	1.3524e+06	1.20401e+06	90740.7	814694	435299	296024	941531	290235
High	MS08_v1_0737	ID:23316468 conserved membrane protein of unknown function [Beijerinckiaceae Ms08]	0	28	10	64	10	379	2.72362e+06	3.10578e+06	1.13492e+06	2.45762e+06	895188	525456	657439	341723
High	MS08_v1_3397	ID:23319128 protein of unknown function [Beijerinckiaceae Ms08]	0	23	14	44	14	598	900866	1.09555e+06	2.54588e+06	3.75847e+06	149976	222932	218700	100567
High	MS08_v1_1415	ID:23317146 protein of unknown function [Beijerinckiaceae Ms08]	0	31	11	44	11	491	2.12399e+06	2.55043e+06	1.17994e+06	2.4706e+06
High	MS08_v1_2178	ID:23317909 rplT| 50S ribosomal subunit protein L20 [Beijerinckiaceae Ms08]	0	43	8	143	8	121	2.90658e+07	2.83517e+07	2.91201e+07	3.67493e+07	1.79261e+07	1.65154e+07	1.06762e+07	1.75701e+07
High	MS08_v1_1874	ID:23317605 conserved protein of unknown function [Beijerinckiaceae Ms08]	0	51	10	75	10	227	8.11941e+06	5.16907e+06	2.09781e+06	6.16965e+06	8.021e+06	4.20617e+06	7.08015e+06	1.0586e+07
High	MS08_v1_1334	ID:23317065 conserved protein of unknown function [Beijerinckiaceae Ms08]	0	46	8	152	8	143	8.17912e+07	6.92935e+07	9.10719e+07	7.68643e+07	4.51249e+07	4.83219e+07	6.65927e+07	5.72839e+07
High	MS08_v1_0861	ID:23316592 putative pyruvate dehydrogenase, E2 component, dihydrolipoamide acetyltransferase [Beijerinckiaceae Ms08]	0	41	12	68	12	394	1.45839e+06	1.28621e+06	795422	973089	5.82498e+06	6.16822e+06	6.67556e+06	6.93197e+06
High	MS08_v1_0125	ID:23315856 thrB| Homoserine kinase [Beijerinckiaceae Ms08]	0	32	9	39	9	321	3.59198e+06	3.45377e+06	1.26712e+06	3.14812e+06	394262	486942	260575	513711
High	MS08_v1_2921	ID:23318652 conserved exported protein of unknown function [Beijerinckiaceae Ms08]	0	58	9	71	9	223	1.00761e+06	1.09719e+06	232969	1.3541e+06	1.20081e+06	1.39136e+06	1.21444e+06	1.27961e+06
High	MS08_v1_1472	ID:23317203 pdxJ| pyridoxine 5'-phosphate synthase [Beijerinckiaceae Ms08]	0	47	8	61	8	252	5.46472e+06	5.04525e+06	2.2052e+06	4.72787e+06	1.92947e+06	2.24941e+06	2.23389e+06	2.2162e+06
High	MS08_v1_2572	ID:23318303 RNA polymerase, sigma-24 subunit, ECF subfamily [Beijerinckiaceae Ms08]	0	52	8	34	8	172	5.17968e+06	4.72776e+06	777744	2.47709e+06	72427.8	262239
High	MS08_v1_3092	ID:23318823 conserved protein of unknown function [Beijerinckiaceae Ms08]	0	61	14	67	14	291	1.39272e+06	1.0191e+06	407517	1.36732e+06	2.62552e+06	1.51834e+06	3.90603e+06	1.91687e+06
High	MS08_v1_1249	ID:23316980 panB| 3-methyl-2-oxobutanoate hydroxymethyltransferase [Beijerinckiaceae Ms08]	0	39	8	68	8	273	736951	1.15814e+06	282261	1.16515e+06	2.08014e+06	3.09889e+06	2.82884e+06	2.57462e+06
High	MS08_v1_2851	ID:23318582 Transcriptional regulator, XRE family [Beijerinckiaceae Ms08]	0	41	18	71	18	481	1.4468e+06	1.25212e+06	984240	1.42564e+06	3.33838e+06	1.88476e+06	822227	948948
High	MS08_v1_0786	ID:23316517 Biopolymer transport protein ExbD/TolR [Beijerinckiaceae Ms08]	0	59	8	44	8	148	4.29454e+06	4.15078e+06	1.46453e+06	3.50504e+06
High	MS08_v1_1011	ID:23316742 Aminotransferase class-III [Beijerinckiaceae Ms08]	0	32	14	38	14	477	3.03857e+06	2.81404e+06	2.49902e+06	2.56567e+06	246615	811174	322885	282687
High	MS08_v1_2411	ID:23318142 glk| Glucokinase [Beijerinckiaceae Ms08]	0	50	11	47	11	332	3.53683e+06	2.68668e+06	1.45333e+06	1.93871e+06	1.26896e+06	1.77907e+06	1.48026e+06	1.63322e+06
High	MS08_v1_2429	ID:23318160 cspA| major cold shock protein [Beijerinckiaceae Ms08]	0	54	4	249	4	69	1.46191e+08	1.24974e+08	1.11008e+08	1.18717e+08	1.58459e+08	1.31473e+08	1.06713e+08	1.15139e+08
High	MS08_v1_0344	ID:23316075 putative glutaryl-CoA dehydrogenase, mitochondrial [Beijerinckiaceae Ms08]	0	42	11	66	11	399	1.8748e+06	1.68472e+06	574165	1.26999e+06	3.72965e+06	4.51377e+06	3.8637e+06	4.57641e+06
High	MS08_v1_0093	ID:23315824 Heat shock protein DnaJ domain protein [Beijerinckiaceae Ms08]	0	44	9	66	9	239	2.64521e+06	2.7066e+06	1.6607e+06	3.30401e+06	2.35583e+06	4.0414e+06	4.63325e+06	2.9576e+06
High	MS08_v1_0247	ID:23315978 coaD| Phosphopantetheine adenylyltransferase [Beijerinckiaceae Ms08]	0	61	8	102	8	164	1.2073e+07	9.39022e+06	4.67577e+06	6.6086e+06	9.18208e+06	9.43264e+06	9.31298e+06	1.07238e+07
High	MS08_v1_2116	ID:23317847 Ceramide glucosyltransferase [Beijerinckiaceae Ms08]	0	38	10	52	10	390	2.35446e+06	1.97814e+06	356193	1.45716e+06	19358.7		34454.3	218717
High	MS08_v1_3416	ID:23319147 rmlC| dTDP-4-deoxyrhamnose-3,5-epimerase [Beijerinckiaceae Ms08]	0	45	7	83	7	187	9.59392e+06	1.01344e+07	7.85103e+06	8.7144e+06	6.62078e+06	8.59047e+06	9.8577e+06	6.90295e+06
High	MS08_v1_0777	ID:23316508 conserved exported protein of unknown function [Beijerinckiaceae Ms08]	0	55	4	124	4	80	3.50915e+07	2.70071e+07	2.18085e+07	2.96271e+07	4.15863e+07	3.44439e+07	2.34606e+07	2.38634e+07
High	MS08_v1_0326	ID:23316057 FAD linked oxidase domain protein [Beijerinckiaceae Ms08]	0	36	14	59	14	491	2.47889e+06	2.37958e+06	880856	2.76175e+06	2.53266e+06	2.18979e+06	2.51661e+06	1.67815e+06
High	MS08_v1_1815	ID:23317546 Anaerobic glycerol-3-phosphate dehydrogenase subunit C [Beijerinckiaceae Ms08]	0	40	13	26	13	448	434967	597560	1.96081e+06	4.53274e+06	55453.9	215319	712416
High	MS08_v1_2113	ID:23317844 ubiE| bifunctional 2-octaprenyl-6-methoxy-1,4-benzoquinone methylase and S-adenosylmethionine:2-DMK methyltransferase [Beijerinckiaceae Ms08]	0	29	7	48	7	275	3.66519e+06	3.84889e+06	2.13115e+06	3.7051e+06	2.43872e+06	1.96947e+06	3.22845e+06	2.47204e+06
High	MS08_v1_0747	ID:23316478 ycjG| L-Ala-D/L-Glu epimerase [Beijerinckiaceae Ms08]	0	34	11	77	11	326	2.34695e+06	2.1417e+06	306851	1.56906e+06	2.52672e+06	3.09821e+06	3.37295e+06	3.8764e+06
High	MS08_v1_2441	ID:23318172 conserved exported protein of unknown function [Beijerinckiaceae Ms08]	0	27	10	73	10	417	4.41323e+06	4.45369e+06	3.4265e+06	4.40084e+06	1.92636e+06	1.82663e+06	4.24404e+06	1.79253e+06
High	MS08_v1_2183	ID:23317914 6-phosphogluconolactonase [Beijerinckiaceae Ms08]	0	41	10	137	10	241	1.54941e+06	1.73238e+06	892923	2.49825e+06	8.52386e+06	8.35681e+06	8.43402e+06	1.00612e+07
High	MS08_v1_0896	ID:23316627 Oxidoreductase molybdopterin binding [Beijerinckiaceae Ms08]	0	41	12	60	12	412	94355.5	98753.2	84194.7	147575	7.7059e+06	8.83913e+06	7.01477e+06	9.67801e+06
High	MS08_v1_1634	ID:23317365 Carbon monoxide dehydrogenase subunit G [Beijerinckiaceae Ms08]	0	58	10	92	10	244	771434	547287	77984.1	522394	2.21275e+07	2.52457e+07	3.37475e+07	2.44415e+07
High	MS08_v1_1445	ID:23317176 glyQ| glycyl-tRNA synthetase, alpha chain [Beijerinckiaceae Ms08]	0	25	7	60	7	314	4.41626e+06	4.01671e+06	5.33911e+06	3.83226e+06	1.00459e+06	1.51113e+06	1.14778e+06	1.00027e+06
High	MS08_v1_3396	ID:23319127 protein of unknown function [Beijerinckiaceae Ms08]	0	38	14	48	14	328	1.63392e+06	2.09701e+06	2.21693e+06	3.3647e+06	1.54148e+06	1.76128e+06	598412	1.37961e+06
High	MS08_v1_3405	ID:23319136 conserved exported protein of unknown function [Beijerinckiaceae Ms08]	0	49	9	79	9	226	4.73291e+06	4.12748e+06	2.4461e+06	4.76636e+06	7.6853e+06	9.02467e+06	7.7238e+06	9.85436e+06
High	MS08_v1_2597	ID:23318328 Lysine--tRNA ligase [Beijerinckiaceae Ms08]	0	28	9	52	9	354	2.5428e+06	4.00925e+06	2.05321e+06	4.6695e+06	423683	989199	978633	300559
High	MS08_v1_2896	ID:23318627 mtnA| Methylthioribose-1-phosphate isomerase [Beijerinckiaceae Ms08]	0	31	9	81	9	369	5.45353e+06	4.4483e+06	2.94139e+06	4.18566e+06	3.12254e+06	3.55008e+06	4.28746e+06	3.65789e+06
High	MS08_v1_3438	ID:23319169 conserved protein of unknown function [Beijerinckiaceae Ms08]	0	57	6	87	6	127	5.96848e+06	4.11741e+06	2.53147e+06	2.52069e+06	3.04234e+07	2.54706e+07	4.39985e+07	2.95336e+07
High	MS08_v1_0213	ID:23315944 gmhA| Phosphoheptose isomerase [Beijerinckiaceae Ms08]	0	39	5	33	5	228		153905	238315	601054	6.40429e+06	8.42411e+06	8.15392e+06	7.62021e+06
High	MS08_v1_1825	ID:23317556 purN| phosphoribosylglycinamide formyltransferase 1 [Beijerinckiaceae Ms08]	0	40	7	35	7	219	2.78084e+06	2.55225e+06	1.09282e+06	1.6031e+06	1.49625e+06	1.27824e+06	1.82916e+06	1.26006e+06
High	MS08_v1_0534	ID:23316265 conserved protein of unknown function [Beijerinckiaceae Ms08]	0	34	8	92	8	282	3.5516e+06	3.25099e+06	1.98517e+06	2.8834e+06	1.79382e+06	1.9168e+06	1.99149e+06	1.50799e+06
High	MS08_v1_2237	ID:23317968 protein of unknown function [Beijerinckiaceae Ms08]	0	71	5	98	5	72	2.1687e+07	1.80518e+07	2.11833e+07	3.51145e+07	2.05492e+07	2.3815e+07	2.7668e+07	2.18004e+07
High	MS08_v1_1751	ID:23317482 conserved exported protein of unknown function [Beijerinckiaceae Ms08]	0	50	6	92	6	111	1.05262e+07	9.4698e+06	5.45946e+06	7.03087e+06	2.60025e+07	2.05842e+07	1.45781e+07	2.04807e+07
High	MS08_v1_2161	ID:23317892 conserved exported protein of unknown function [Beijerinckiaceae Ms08]	0	39	10	48	10	307	4.4128e+06	3.97566e+06	445083	4.1856e+06	48557.8	20911.1
High	MS08_v1_1340	ID:23317071 rpsO| 30S ribosomal subunit protein S15 [Beijerinckiaceae Ms08]	0	44	4	76	4	89	4.37085e+07	3.79487e+07	4.0772e+07	3.50097e+07	1.15947e+07	1.50972e+07	1.40953e+07	1.51219e+07
High	MS08_v1_1729	ID:23317460 conserved protein of unknown function [Beijerinckiaceae Ms08]	0	68	10	94	10	179	2.28518e+06	2.55661e+06	445386	2.30362e+06	4.77844e+06	5.32731e+06	6.86431e+06	4.86076e+06
High	MS08_v1_2598	ID:23318329 efp| Elongation factor P [Beijerinckiaceae Ms08]	0	39	7	126	7	189	1.73207e+07	1.73687e+07	9.20323e+06	1.05989e+07	4.65306e+06	5.48223e+06	5.12606e+06	5.15232e+06
High	MS08_v1_1612	ID:23317343 Calcium-transporting ATPase (modular protein) [Beijerinckiaceae Ms08]	0	12	14	68	5	1313	149704	176987	135890	190529		59457.4
High	MS08_v1_1961	ID:23317692 hemC| Porphobilinogen deaminase [Beijerinckiaceae Ms08]	0	39	7	46	7	255	2.95065e+06	2.28967e+06	1.04366e+07	1.91881e+06	1.12348e+06	1.58165e+06	1.64948e+06	860370
High	MS08_v1_0347	ID:23316078 cysE| serine acetyltransferase [Beijerinckiaceae Ms08]	0	46	13	124	13	277	3.54139e+06	3.21085e+06	1.75527e+06	3.0078e+06	6.15161e+06	6.11302e+06	7.30053e+06	7.10981e+06
High	MS08_v1_0661	ID:23316392 Glycosyl transferase family 2 [Beijerinckiaceae Ms08]	0	31	11	49	11	399	4.1906e+06	3.61778e+06	3.91167e+06	4.25313e+06	330889	296059	67892.3	143599
High	MS08_v1_1995	ID:23317726 conserved protein of unknown function [Beijerinckiaceae Ms08]	0	43	7	71	7	204	1.01676e+07	6.82176e+06	4.9485e+06	8.79874e+06	7.91861e+06	8.06586e+06	1.01596e+07	7.76284e+06
High	MS08_v1_3116	ID:23318847 folE| GTP cyclohydrolase 1 [Beijerinckiaceae Ms08]	0	59	10	120	10	190	3.32487e+06	2.76865e+06	4.14275e+06	4.03032e+06	1.25013e+07	1.20685e+07	1.67929e+07	1.86235e+07
High	MS08_v1_1119	ID:23316850 conserved exported protein of unknown function [Beijerinckiaceae Ms08]	0	39	4	300	4	179	4.35537e+07	3.08405e+07	3.63802e+07	4.87849e+07	8.94616e+08	1.18273e+09	1.29388e+09	7.43292e+08
High	MS08_v1_3039	ID:23318770 coxM| Alternative cytochrome c oxidase subunit 2 [Beijerinckiaceae Ms08]	0	25	5	25	5	272	3.15249e+06	2.90766e+06	3.0378e+06	4.02165e+06	5.89775e+06	4.8139e+06	3.8685e+06	5.08685e+06
High	MS08_v1_0062	ID:23315793 thiG| thiamin biosynthesis ThiGH complex subunit [Beijerinckiaceae Ms08]	0	57	14	101	14	265	3.57336e+06	3.36924e+06	913320	2.36969e+06	2.65904e+06	3.38528e+06	4.31845e+06	4.39136e+06
High	MS08_v1_2205	ID:23317936 amtB| ammonium transporter [Beijerinckiaceae Ms08]	0	12	5	91	5	512	4.19876e+07	3.37591e+07	3.44422e+07	3.30054e+07	3.46872e+07	2.85359e+07	3.28603e+07	2.78924e+07
High	MS08_v1_0393	ID:23316124 Transglutaminase domain protein [Beijerinckiaceae Ms08]	0	43	10	55	10	272	1.90029e+06	1.44289e+06	478114	1.02568e+06	2.88521e+06	4.05848e+06	4.52661e+06	3.74205e+06
High	MS08_v1_1095	ID:23316826 Transcriptional regulator, ArsR family [Beijerinckiaceae Ms08]	0	43	11	61	11	336	2.61924e+06	2.86576e+06	1.54607e+06	2.09851e+06	1.45439e+06	1.64001e+06	1.34555e+06	1.9983e+06
High	MS08_v1_3076	ID:23318807 Extracellular solute-binding protein family 3 (fragment) [Beijerinckiaceae Ms08]	0	37	8	52	8	274	3.40789e+06	2.42077e+06	2.29189e+06	2.3187e+06	1.01045e+06	990297	1.21434e+06	682434
High	MS08_v1_0405	ID:23316136 Acetylornithine deacetylase (ArgE) [Beijerinckiaceae Ms08]	0	27	9	51	9	391	2.28888e+06	2.18753e+06	1.79701e+06	2.10137e+06	1.31499e+06	1.44515e+06	566418	1.03588e+06
High	MS08_v1_1160	ID:23316891 Polyhydroxyalkanoate depolymerase, intracellular [Beijerinckiaceae Ms08]	0	33	12	54	12	429	2.53078e+06	2.47262e+06	639217	1.51211e+06	53680.5	148066	130253
High	MS08_v1_0168	ID:23315899 Dihydropteroate synthase DHPS [Beijerinckiaceae Ms08]	0	39	13	61	13	462	1.54015e+06	1.56532e+06	410636	1.68649e+06	2.67755e+06	3.26941e+06	3.35537e+06	3.21453e+06
High	MS08_v1_2024	ID:23317755 putative pyruvate, phosphate dikinase regulatory protein [Beijerinckiaceae Ms08]	0	36	8	45	8	277	1.08213e+07	5.20646e+06	1.87924e+07	4.16912e+06	1.06241e+07	4.92739e+06	9.2406e+06	1.55737e+07
High	MS08_v1_0478	ID:23316209 aroQ| 3-dehydroquinate dehydratase [Beijerinckiaceae Ms08]	0	40	5	75	5	177	4.42702e+06	4.59606e+06	3.21385e+06	4.59335e+06	4.50551e+06	4.48525e+06	4.82777e+06	4.57697e+06
High	MS08_v1_0559	ID:23316290 SmpA/OmlA domain protein [Beijerinckiaceae Ms08]	0	30	5	125	5	153	3.13225e+07	3.19455e+07	1.91905e+07	3.81631e+07	2.38697e+07	3.51878e+07	2.97259e+07	3.10365e+07
High	MS08_v1_1752	ID:23317483 conserved exported protein of unknown function [Beijerinckiaceae Ms08]	0	29	4	110	4	181	1.182e+07	1.11023e+07	5.29625e+06	1.38963e+07	1.87381e+07	2.39368e+07	2.1882e+07	1.91061e+07
High	MS08_v1_0758	ID:23316489 Short-chain dehydrogenase/reductase SDR [Beijerinckiaceae Ms08]	0	56	12	86	12	249	2.57978e+06	3.23757e+06	1.6869e+06	2.55916e+06	4.90424e+06	4.66368e+06	1.02972e+07	7.20114e+06
High	MS08_v1_3084	ID:23318815 conserved protein of unknown function [Beijerinckiaceae Ms08]	0	31	9	55	9	297	4.9685e+06	4.12837e+06	5.54897e+06	7.43447e+06	1.79029e+06	1.85443e+06	1.05424e+06	1.26126e+06
High	MS08_v1_1814	ID:23317545 Rubrerythrin [Beijerinckiaceae Ms08]	0	51	7	83	7	152	1.39514e+06	1.74586e+06	6.40702e+07	5.25028e+07	1.75448e+06	997097	4.86435e+06	857347
High	MS08_v1_1818	ID:23317549 ahpD| Alkyl hydroperoxide reductase AhpD [Beijerinckiaceae Ms08]	0	59	8	59	8	177	3.83449e+06	4.0855e+06	1.2392e+06	1.33106e+06	336598		903643	854564
High	MS08_v1_0590	ID:23316321 bepG| Efflux pump membrane transporter BepG [Beijerinckiaceae Ms08]	0	13	10	29	10	1054	636015	1.11237e+06	219322	979588	1.45834e+06	861907	842605	620720
High	MS08_v1_1395	ID:23317126 conserved exported protein of unknown function [Beijerinckiaceae Ms08]	0	66	4	64	4	112		62113.5	192575		6.21251e+07	4.44806e+07	2.79534e+07	2.94698e+07
High	MS08_v1_0219	ID:23315950 conserved protein of unknown function [Beijerinckiaceae Ms08]	0	38	8	61	8	216	5.2915e+06	4.29398e+06	6.25659e+06	3.42029e+06	1.69277e+07	1.75142e+07	1.72712e+07	1.79006e+07
High	MS08_v1_2538	ID:23318269 pmoC| PmoC [Beijerinckiaceae Ms08]	0	11	6	291	2	263	6.2565e+07	5.96718e+07	7.15327e+07	4.31865e+07	1.46372e+07	1.0622e+07	1.46276e+07	7.36858e+06
High	MS08_v1_1475	ID:23317206 rnc| Ribonuclease 3 [Beijerinckiaceae Ms08]	0	48	10	59	10	236	1.7588e+06	1.8707e+06	848865	1.94533e+06	1.30223e+06	1.78158e+06	2.09001e+06	1.80603e+06
High	MS08_v1_2037	ID:23317768 hisH| imidazole glycerol phosphate synthase, glutamine amidotransferase subunit with HisF [Beijerinckiaceae Ms08]	0	51	8	45	8	216	2.73098e+06	2.46719e+06	1.32197e+06	2.29012e+06	1.80698e+06	2.59413e+06	1.80573e+06	1.72407e+06
High	MS08_v1_0027	ID:23315758 conserved exported protein of unknown function [Beijerinckiaceae Ms08]	0	41	10	83	10	252	1.17814e+06	581926	247168	919524	7.25037e+06	7.26687e+06	9.29437e+06	7.80413e+06
High	MS08_v1_1420	ID:23317151 Antibiotic biosynthesis monooxygenase [Beijerinckiaceae Ms08]	0	41	11	66	11	328	2.21231e+06	2.50274e+06	1.56935e+06	2.98603e+06	4.77953e+06	3.88358e+06	4.36161e+06	5.07036e+06
High	MS08_v1_2593	ID:23318324 cysE| serine acetyltransferase [Beijerinckiaceae Ms08]	0	40	10	36	10	286	1.92834e+06	1.92073e+06	1.00718e+06	1.48807e+06	710402	439383	395520	169484
High	MS08_v1_2942	ID:23318673 Transporter, AcrB/AcrD/AcrF family protein [Beijerinckiaceae Ms08]	0	20	16	65	16	1085	1.5228e+06	1.31671e+06	3.93565e+06	1.7569e+06	3.24263e+06	1.9503e+06	3.52883e+06	3.82475e+06
High	MS08_v1_0351	ID:23316082 protein of unknown function [Beijerinckiaceae Ms08]	0	62	11	113	11	157	4.83844e+06	4.83154e+06	3.41186e+06	7.36689e+06	9.96038e+06	1.00861e+07	7.72167e+06	9.12228e+06
High	MS08_v1_1957	ID:23317688 ABC transporter related [Beijerinckiaceae Ms08]	0	41	10	87	10	261	1.57876e+06	1.81375e+06	679361	1.73079e+06	4.53072e+06	3.50542e+06	5.86768e+06	4.17792e+06
High	MS08_v1_1025	ID:23316756 conserved membrane protein of unknown function [Beijerinckiaceae Ms08]	0	25	11	56	11	431	2.87672e+06	3.05605e+06	1.61377e+06	2.54361e+06	2.0256e+06	1.8933e+06	1.93712e+06	1.5002e+06
High	MS08_v1_2196	ID:23317927 Ribosome maturation factor RimP (modular protein) [Beijerinckiaceae Ms08]	0	16	7	43	7	708	2.74094e+06	1.98805e+06	1.05861e+06	2.6127e+06	1.2421e+06	1.44918e+06	1.63635e+06	2.19846e+06
High	MS08_v1_2310	ID:23318041 membrane protein of unknown function [Beijerinckiaceae Ms08]	0	34	11	58	11	306	3.29329e+06	4.00084e+06	1.89099e+06	4.25837e+06	1.11537e+06	668171	514942	365464
High	MS08_v1_2943	ID:23318674 Efflux transporter, RND family, MFP subunit [Beijerinckiaceae Ms08]	0	42	13	100	13	330	2.90605e+06	2.12576e+06	2.51861e+06	3.568e+06	3.88805e+06	2.38355e+06	3.52174e+06	2.81722e+06
High	MS08_v1_1709	ID:23317440 leuD| 3-isopropylmalate isomerase subunit [Beijerinckiaceae Ms08]	0	51	13	53	13	245	3.01636e+06	3.181e+06	3.18959e+06	6.0208e+06	3.83171e+06	5.47764e+06	5.97804e+06	5.10443e+06
High	MS08_v1_1041	ID:23316772 conserved protein of unknown function [Beijerinckiaceae Ms08]	0	76	4	80	4	63	641874	454403	705414	2.06526e+06	1.07968e+08	5.88091e+07	6.97941e+07	6.62517e+07
High	MS08_v1_0902	ID:23316633 yliK| methylmalonyl-CoA mutase [Beijerinckiaceae Ms08]	0	25	16	50	16	717	1.57198e+06	1.12939e+06	627147	927235	2.08503e+06	1.8828e+06	1.23478e+06	2.02774e+06
High	MS08_v1_1607	ID:23317338 conserved protein of unknown function [Beijerinckiaceae Ms08]	0	49	4	168	4	71	2.62208e+07	2.80277e+07	1.57468e+07	2.59199e+07	1.99349e+08	1.36227e+08	1.68059e+08	1.38198e+08
High	MS08_v1_0218	ID:23315949 conserved protein of unknown function [Beijerinckiaceae Ms08]	0	31	12	64	12	449	480925	722508	680821	1.43685e+06	7.22678e+06	8.39454e+06	8.01627e+06	9.59728e+06
High	MS08_v1_1416	ID:23317147 Oxidoreductase [Beijerinckiaceae Ms08]	0	31	9	75	9	283	4.51485e+06	6.11075e+06	1.92535e+06	6.15257e+06	5.17779e+06	8.60485e+06	1.07998e+07	6.98896e+06
High	MS08_v1_3126	ID:23318857 pstB| phosphate transporter subunit ; ATP-binding component of ABC superfamily [Beijerinckiaceae Ms08]	0	44	10	54	10	302	3.22572e+06	2.63443e+06	1.38447e+06	2.51994e+06	707298	1.07452e+06	1.04254e+06	674863
High	MS08_v1_2799	ID:23318530 conserved protein of unknown function [Beijerinckiaceae Ms08]	0	36	6	105	6	168	1.88179e+06	1.76551e+06	201261	2130724	1.92033e+07	2.19075e+07	1.29123e+08	2.816e+07
High	MS08_v1_0736	ID:23316467 ABC transporter related [Beijerinckiaceae Ms08]	0	31	8	43	8	294	3.33173e+06	2.98357e+06	2.20979e+06	1.65166e+06	531469	722657	611268	996746
High	MS08_v1_1391	ID:23317122 PRC-barrel domain protein [Beijerinckiaceae Ms08]	0	43	5	178	5	135	902104	906204	766770	1.42982e+06	1.58963e+08	1.67471e+08	2.15915e+08	1.76915e+08
High	MS08_v1_1181	ID:23316912 Formaldehyde-activating enzyme [Beijerinckiaceae Ms08]	0	45	5	46	5	179	4.89035e+06	5.43408e+06	1.99135e+06	4.45115e+06	1.875e+06	1.8913e+06	3.42781e+06	3.41833e+06
High	MS08_v1_2140	ID:23317871 pmoC| PmoC [Beijerinckiaceae Ms08]	0	11	6	268	2	263	5.28341e+08	5.12787e+08	5.35284e+08	7.14068e+08	1.66237e+08	1.34815e+08	1.5491e+08	1.19067e+08
High	MS08_v1_2557	ID:23318288 conserved exported protein of unknown function [Beijerinckiaceae Ms08]	0	44	8	71	8	189	8.21097e+06	7.96399e+06	2.05427e+06	1.28895e+07	4.81425e+06	4.31786e+06	5.6509e+06	2.63895e+06
High	MS08_v1_2004	ID:23317735 ltaE| Low specificity L-threonine aldolase [Beijerinckiaceae Ms08]	0	45	11	62	11	354	2.84847e+06	2.48904e+06	1.84531e+06	2.36513e+06	2.373e+06	2.30854e+06	2.42623e+06	2.72596e+06
High	MS08_v1_0899	ID:23316630 protein of unknown function [Beijerinckiaceae Ms08]	0	70	11	41	11	208	1.6138e+06	1.26202e+06	938331	2.73002e+06	299266	971065	499565	318646
High	MS08_v1_0146	ID:23315877 gcvT| Aminomethyltransferase, mitochondrial [Beijerinckiaceae Ms08]	0	48	15	65	15	385	1.34481e+06	1.34223e+06	418042	1.1396e+06	3.60101e+06	2.57322e+06	5.06533e+06	2.90592e+06
High	MS08_v1_2307	ID:23318038 conserved exported protein of unknown function [Beijerinckiaceae Ms08]	0	47	4	105	4	118	2.16328e+07	2.18555e+07	1.55371e+07	5.606e+07	3.4032e+07	1.9726e+07	3.87553e+07	2.3196e+07
High	MS08_v1_1116	ID:23316847 lspL| UDP-glucuronate 5'-epimerase [Beijerinckiaceae Ms08]	0	35	10	64	10	335	2.546e+06	2.92848e+06	974750	2.40161e+06	515013	689444	929022	346148
High	MS08_v1_2495	ID:23318226 yliG| putative AdoMet-dependent methyltransferase, UPF0004 family [Beijerinckiaceae Ms08]	0	36	13	28	13	460	355589	435611	102425	464476
High	MS08_v1_3426	ID:23319157 putative acyl-CoA thioesterase (TesA-like) [Beijerinckiaceae Ms08]	0	37	8	53	8	244	2.28334e+06	2.3703e+06	513035	2.21009e+06	2.58765e+06	2.3026e+06	4.29242e+06	2.33275e+06
High	MS08_v1_1107	ID:23316838 cycY| Thiol:disulfide interchange protein CycY [Beijerinckiaceae Ms08]	0	54	8	36	8	199	2.9687e+06	2.71847e+06	2.54246e+06	3.53956e+06	466098	402881	198824	135079
High	MS08_v1_0453	ID:23316184 rplP| 50S ribosomal subunit protein L16 [Beijerinckiaceae Ms08]	0	39	5	84	5	137	2.15416e+07	1.98595e+07	1.17804e+07	1.79817e+07	9.02752e+06	8.61499e+06	5.5549e+06	7.30541e+06
High	MS08_v1_2241	ID:23317972 acpP| acyl carrier protein (ACP) [Beijerinckiaceae Ms08]	0	16	2	159	2	79	1.02294e+08	1.01141e+08	6.42654e+07	9.90032e+07	8.86856e+07	1.21856e+08	1.43746e+08	1.12823e+08
High	MS08_v1_3319	ID:23319050 Methyltransferase type 11 [Beijerinckiaceae Ms08]	0	40	10	41	10	274	6.30826e+06	4.04786e+06	1.44986e+06	2.65131e+06	1.55668e+06	1.38729e+06	389323	794355
High	MS08_v1_3215	ID:23318946 Transcriptional regulator, TetR family [Beijerinckiaceae Ms08]	0	40	8	57	8	243	3.72686e+06	4.4932e+06	3.08353e+06	2.33666e+06	59504.7		365614
High	MS08_v1_1779	ID:23317510 exported protein of unknown function [Beijerinckiaceae Ms08]	0	57	6	56	6	129	687331	424386	3.48219e+06	7.30584e+06	7.54114e+06	6.03876e+06	6.23125e+06	5.50602e+06
High	MS08_v1_0260	ID:23315991 ppa| inorganic pyrophosphatase [Beijerinckiaceae Ms08]	0	44	8	114	8	176	2.02037e+07	2.10967e+07	9.51327e+06	1.4617e+07	1.01678e+07	9.79808e+06	1.83821e+07	1.03522e+07
High	MS08_v1_2338	ID:23318069 Peptidase M15D vanX D-ala-D-ala dipeptidase [Beijerinckiaceae Ms08]	0	38	6	36	6	222	2.32982e+06	2.01616e+06	570932	2.0938e+06	1.58328e+06	988452	1.66794e+06	1.11264e+06
High	MS08_v1_0773	ID:23316504 conserved exported protein of unknown function [Beijerinckiaceae Ms08]	0	52	8	139	8	216	3.50232e+06	3.76843e+06	2.97862e+06	5.61102e+06	3.19577e+07	2.61258e+07	2.36875e+07	3.032e+07
High	MS08_v1_3452	ID:23319183 exported protein of unknown function [Beijerinckiaceae Ms08]	0	43	7	80	7	222	2.09675e+06	2.27679e+06	840843	1.7713e+06	5.908e+06	5.50598e+06	8.49758e+06	1.33482e+07
High	MS08_v1_0849	ID:23316580 fadD| acyl-CoA synthetase (long-chain-fatty-acid--CoA ligase) [Beijerinckiaceae Ms08]	0	31	13	63	13	552	1.01762e+06	1.20348e+06	266334	930388	3.94837e+06	3.60553e+06	2.65889e+06	3.47862e+06
High	MS08_v1_1503	ID:23317234 fabZ| (3R)-hydroxymyristol acyl carrier protein dehydratase [Beijerinckiaceae Ms08]	0	33	5	94	5	155	7.00174e+06	6.99891e+06	3.25199e+06	6.2843e+06	2.25172e+06	3.50732e+06	1.37638e+06	2.50924e+06
High	MS08_v1_1049	ID:23316780 putative phosphohistidine phosphatase, SixA [Beijerinckiaceae Ms08]	0	55	7	57	7	179	563334	770111	341532	1.15596e+06	2.05657e+06	2.56418e+06	2.35867e+06	2.78204e+06
High	MS08_v1_2489	ID:23318220 ybaB| conserved hypothetical protein [Beijerinckiaceae Ms08]	0	64	6	86	6	107	7.75663e+06	8.46676e+06	1.10086e+07	9.32591e+06	1.41371e+07	1.82593e+07	2.15776e+07	1.74032e+07
High	MS08_v1_2939	ID:23318670 Integral membrane sensor signal transduction histidine kinase [Beijerinckiaceae Ms08]	0	36	13	84	13	467	2.32084e+06	2.35367e+06	1.19053e+06	2.6832e+06	3.00964e+06	1.84172e+06	2.75055e+06	1.82962e+06
High	MS08_v1_2527	ID:23318258 CMP/dCMP deaminase, zinc-binding (modular protein) [Beijerinckiaceae Ms08]	0	40	7	75	7	191	3.94844e+06	5.92827e+06	4.22088e+06	6.05322e+06	5.32223e+06	4.06356e+06	5.45984e+06	8.63227e+06
High	MS08_v1_2097	ID:23317828 putative abc transporter; periplasmic binding protein precurser [Beijerinckiaceae Ms08]	0	33	9	62	9	301	1.70708e+06	1.37851e+06	876134	2.31807e+06	2.07238e+06	2.13274e+06	2.43186e+06	2.40678e+06
High	MS08_v1_0729	ID:23316460 exported protein of unknown function [Beijerinckiaceae Ms08]	0	45	7	84	7	165	7.79565e+06	8.01852e+06	7.6315e+06	8.32202e+06	1.05363e+07	1.33703e+07	1.05601e+07	1.19976e+07
High	MS08_v1_1223	ID:23316954 cysS| Cysteine--tRNA ligase [Beijerinckiaceae Ms08]	0	33	14	49	14	457	1.68116e+06	2.18659e+06	685095	2.80512e+06	702766	651771	911108	782787
High	MS08_v1_2885	ID:23318616 TonB like protein [Beijerinckiaceae Ms08]	0	35	8	48	8	256	6.76084e+06	6.15812e+06	1.54729e+06	4.04154e+06	98345.8	146316	211050	226382
High	MS08_v1_2635	ID:23318366 exported protein of unknown function [Beijerinckiaceae Ms08]	0	54	6	70	6	125	3.57902e+06	4.44218e+06	6.40247e+06	9.09662e+06	6.40348e+07	4.3092e+07	3.59559e+07	2.90005e+07
High	MS08_v1_1904	ID:23317635 modC| Molybdenum import ATP-binding protein ModC [Beijerinckiaceae Ms08]	0	44	13	36	13	365	778280	1.26647e+06	136141	710981	261344	523499	535866	387790
High	MS08_v1_1649	ID:23317380 Polynucleotide adenylyltransferase region [Beijerinckiaceae Ms08]	0	37	11	63	11	422	754268	660905		664581	1.12405e+06	1.19928e+06	730296	1.24074e+06
High	MS08_v1_3329	ID:23319060 Aminotransferase class I and II [Beijerinckiaceae Ms08]	0	35	10	59	10	396	352198	409586	104591	420750	1.3585e+06	1.29849e+06	1.40863e+06	1.57609e+06
High	MS08_v1_0221	ID:23315952 conserved protein of unknown function [Beijerinckiaceae Ms08]	0	45	6	63	6	172	1.16641e+06	1.22755e+06	406869	1.78734e+06	5.95323e+06	5.28659e+06	6.96758e+06	6.33339e+06
High	MS08_v1_2973	ID:23318704 conserved protein of unknown function [Beijerinckiaceae Ms08]	0	57	9	98	9	179	3.65011e+06	3.37267e+06	1.88254e+06	5.01081e+06	2.87677e+06	2.62227e+06	3.01699e+06	3.55985e+06
High	MS08_v1_2199	ID:23317930 Peptidase S16 lon domain protein [Beijerinckiaceae Ms08]	0	52	9	63	9	222	712709	475964	128352	1.38057e+06	3.29928e+06	2.81952e+06	4.9426e+06	3.22806e+06
High	MS08_v1_1254	ID:23316985 protein of unknown function [Beijerinckiaceae Ms08]	0	99	5	59	5	79	3.15284e+06	2.44049e+06	3.74246e+06	2.74352e+06	1.89134e+08	1.00442e+08	5.06096e+07	6.80264e+07
High	MS08_v1_2801	ID:23318532 conserved protein of unknown function [Beijerinckiaceae Ms08]	0	83	10	34	10	150	339065	448029	1.97136e+06	2.53352e+06	5.95099e+06	4.03948e+06	7.1529e+06	1.9219e+06
High	MS08_v1_3031	ID:23318762 tnaA| Tryptophanase [Beijerinckiaceae Ms08]	0	35	13	83	13	460	481598	431319	211354	344564	6.76809e+06	6.50303e+06	8.36098e+06	7.34813e+06
High	MS08_v1_0511	ID:23316242 putative carboxymethylenebutenolidase [Beijerinckiaceae Ms08]	0	47	10	88	10	287	2.21151e+06	1.94196e+06	1.13571e+07	3.60159e+06	1.60298e+07	1.82754e+07	2.59821e+07	2.51148e+07
High	MS08_v1_2296	ID:23318027 Indole-3-glycerol-phosphate synthase [Beijerinckiaceae Ms08]	0	33	8	41	8	288	1.28586e+06	520446	582985	970908	229593	147745	287325	219844
High	MS08_v1_3171	ID:23318902 ABC transporter ATP-binding protein (modular protein) [Beijerinckiaceae Ms08]	0	45	5	30	5	148	2.09373e+06	254102	912435	1.52433e+06	2.11382e+06	2.94943e+06	2.59533e+06	3.0043e+06
High	MS08_v1_2675	ID:23318406 conserved protein of unknown function [Beijerinckiaceae Ms08]	0	66	6	53	6	144	2.73743e+06	1.32588e+06	2.65743e+06	1.06792e+06	2.86733e+06	4.85995e+06	8.16885e+06	6.62937e+06
High	MS08_v1_1580	ID:23317311 conserved protein of unknown function [Beijerinckiaceae Ms08]	0	30	9	42	9	345	4.09724e+06	4.40894e+06	1.49847e+06	4.35645e+06	392589	547115	340628	206884
High	MS08_v1_2167	ID:23317898 xerD| Tyrosine recombinase XerD [Beijerinckiaceae Ms08]	0	44	12	51	12	322	1.17683e+06	1.45519e+06	1.09264e+06	2.40017e+06	262201	277152	78925.3	71999.1
High	MS08_v1_3465	ID:23319196 Antibiotic biosynthesis monooxygenase [Beijerinckiaceae Ms08]	0	79	7	61	7	109	9.57109e+06	8.10422e+06	5.85803e+06	7.92197e+06	4.10038e+06	4.67634e+06	4.80912e+06	4.50682e+06
High	MS08_v1_1635	ID:23317366 conserved protein of unknown function [Beijerinckiaceae Ms08]	0	41	13	68	13	343	1.22928e+06	1.53933e+06	180013	560449	1.1291e+07	8.09695e+06	8.42233e+06	1.13073e+07
High	MS08_v1_3190	ID:23318921 conserved exported protein of unknown function [Beijerinckiaceae Ms08]	0	39	7	51	7	303	2.99607e+06	3.30656e+06	3.10133e+06	3.23332e+06	5.41417e+06	5.43411e+06	6.79539e+06	5.629e+06
High	MS08_v1_2186	ID:23317917 conserved protein of unknown function [Beijerinckiaceae Ms08]	0	31	7	28	6	295	2.57906e+06	2.14141e+06	360589	1.58616e+06	313039
High	MS08_v1_1803	ID:23317534 Transcriptional regulator, TetR family [Beijerinckiaceae Ms08]	0	53	12	61	12	240	2.11999e+06	2.52917e+06	1.13613e+06	1.90978e+06	684437	718434	2.95043e+06	540548
High	MS08_v1_3018	ID:23318749 conserved protein of unknown function [Beijerinckiaceae Ms08]	0	39	10	89	10	298	2.47613e+06	2.56728e+06	1.43682e+06	4.57911e+06	2.204e+06	1.77618e+06	4.34581e+06	2.19375e+06
High	MS08_v1_1584	ID:23317315 conserved protein of unknown function [Beijerinckiaceae Ms08]	0	64	10	41	10	163	2.40717e+06	2.35379e+06	232664	1.94104e+06	524639	509477	596040	717367
High	MS08_v1_3232	ID:23318963 xseA| Exodeoxyribonuclease 7 large subunit [Beijerinckiaceae Ms08]	0	30	13	63	13	522	2.92361e+06	3.01662e+06	668015	2.8271e+06	1.93838e+06	1.65371e+06	1.12419e+06	1.4027e+06
High	MS08_v1_1519	ID:23317250 conserved protein of unknown function [Beijerinckiaceae Ms08]	0	44	10	73	10	284	2.83913e+06	2.56807e+06	1.00845e+07	3.7099e+06	5.82879e+06	4.08595e+06	5.20488e+06	6.57324e+06
High	MS08_v1_0500	ID:23316231 tpiA| Triosephosphate isomerase [Beijerinckiaceae Ms08]	0	38	6	46	6	255	1.10962e+06	997859	152318	1.15472e+06	766828	997108	59320.6
High	MS08_v1_0426	ID:23316157 cobT| Nicotinate-nucleotide--dimethylbenzimidazole phosphoribosyltransferase [Beijerinckiaceae Ms08]	0	32	9	54	9	343	2.13872e+06	2.03391e+06	818251	2.27487e+06	2.0258e+06	2.60404e+06	2.59268e+06	2.28936e+06
High	MS08_v1_0329	ID:23316060 uvrD| putative DNA helicase II homolog [Beijerinckiaceae Ms08]	0	22	16	52	16	785	2.47815e+06	2.333e+06	1.09118e+06	3.02939e+06	484047	145108	638283	158087
High	MS08_v1_1421	ID:23317152 conserved exported protein of unknown function [Beijerinckiaceae Ms08]	0	55	7	65	7	148	1.82829e+06	1.63982e+06	2.45123e+06	4.18826e+06	6.63077e+06	8.64108e+06	6.2358e+06	7.44353e+06
High	MS08_v1_3398	ID:23319129 exported protein of unknown function [Beijerinckiaceae Ms08]	0	48	3	82	3	83	1.57297e+07	1.45534e+07	9.30358e+06	1.37756e+07	1.65328e+07	1.88311e+07	1.15165e+07	1.68996e+07
High	MS08_v1_0106	ID:23315837 conserved exported protein of unknown function [Beijerinckiaceae Ms08]	0	45	3	126	3	84	1.18681e+07	1.12754e+07	4.91569e+06	1.08172e+07	9.90602e+07	9.66465e+07	5.52408e+07	1.01937e+08
High	MS08_v1_1081	ID:23316812 yajC| Immunogenic membrane protein YajC [Beijerinckiaceae Ms08]	0	38	5	157	5	116	5.37748e+07	5.63018e+07	3.77732e+07	5.26979e+07	3.85639e+07	3.63733e+07	4.22555e+07	4.37019e+07
High	MS08_v1_0283	ID:23316014 Cold-shock DNA-binding domain protein [Beijerinckiaceae Ms08]	0	56	8	27	8	194	2.20762e+06	2.39155e+06	1.12284e+06	1.92093e+06				229737
High	MS08_v1_3454	ID:23319185 conserved protein of unknown function [Beijerinckiaceae Ms08]	0	41	5	68	5	128	2.06692e+07	2.08282e+07	9.98368e+06	1.63651e+07	7.59324e+06	8.85344e+06	9.73002e+06	8.42106e+06
High	MS08_v1_0562	ID:23316293 thiL| Thiamine-monophosphate kinase [Beijerinckiaceae Ms08]	0	40	9	51	9	331	1.02727e+06	1.22341e+06	446746	702731	1.37897e+06	1.82529e+06	2.34168e+06	1.9117e+06
High	MS08_v1_1418	ID:23317149 Molybdopterin dehydrogenase FAD-binding [Beijerinckiaceae Ms08]	0	42	10	67	10	281	429992	469973		538207	5.75652e+06	5.037e+06	3.04223e+06	5.93656e+06
High	MS08_v1_2460	ID:23318191 rutF| FMN reductase (NADH) RutF 2 [Beijerinckiaceae Ms08]	0	37	5	37	5	182	1.98847e+06	1.79381e+06	1.25744e+06	1.21501e+06	222745	289177	297408
High	MS08_v1_3195	ID:23318926 putative cold shock protein y4cH [Beijerinckiaceae Ms08]	0	75	6	319	6	69	3.76264e+08	3.41815e+08	2.28149e+08	3.59348e+08	5.11082e+08	4.2176e+08	5.61087e+08	4.33815e+08
High	MS08_v1_1885	ID:23317616 conserved protein of unknown function [Beijerinckiaceae Ms08]	0	27	7	30	7	268	4.05227e+06	3.81513e+06	1.06712e+06	2.40846e+06		42577.3
High	MS08_v1_0921	ID:23316652 NADH:ubiquinone oxidoreductase 17.2 kD subunit [Beijerinckiaceae Ms08]	0	53	6	71	6	133	7.92353e+06	1.01789e+07	3.30307e+06	7.37901e+06	4.627e+06	2.19889e+06	1.95456e+06	1.14872e+06
High	MS08_v1_0580	ID:23316311 conserved exported protein of unknown function [Beijerinckiaceae Ms08]	0	30	8	24	8	317	2.35696e+06	2.59982e+06	1.18665e+06	2.11843e+06		20156.5
High	MS08_v1_1691	ID:23317422 conserved protein of unknown function [Beijerinckiaceae Ms08]	0	36	8	100	8	258	600834	597861	393400	980638	4.63047e+06	5.38385e+06	5.42871e+06	6.70226e+06
High	MS08_v1_1202	ID:23316933 conserved membrane protein of unknown function [Beijerinckiaceae Ms08]	0	29	9	99	9	378	2.20785e+06	2.17316e+06	1.30322e+06	2.39476e+06	4.09585e+06	3.12826e+06	4.74126e+06	2.50052e+06
High	MS08_v1_2859	ID:23318590 N-formylglutamate amidohydrolase [Beijerinckiaceae Ms08]	0	48	10	70	10	272	3.3616e+06	2.8565e+06	2.20444e+06	2.84959e+06	2.21024e+06	2.32189e+06	2.18789e+06	2.47596e+06
High	MS08_v1_3103	ID:23318834 ptsN| Nitrogen regulatory protein [Beijerinckiaceae Ms08]	0	44	5	51	5	158	3.92415e+06	3.67464e+06	1.88977e+06	3.20175e+06	1.45481e+06	1.45863e+06	1.32066e+06	754135
High	MS08_v1_2765	ID:23318496 conserved protein of unknown function [Beijerinckiaceae Ms08]	0	76	6	27	6	104	1.21793e+06	1.50486e+06	939848	1.90237e+06		56385.5	42068
High	MS08_v1_1443	ID:23317174 conserved exported protein of unknown function [Beijerinckiaceae Ms08]	0	22	4	389	4	162	6.61628e+06	7.01297e+06	1.93694e+07	1.02056e+07	1.3356e+09	1.61271e+09	1.06985e+09	1.24066e+09
High	MS08_v1_0470	ID:23316201 rplL| 50S ribosomal protein L7/L12 [Beijerinckiaceae Ms08]	0	30	3	120	3	125	1.60188e+08	1.5139e+08	9.2911e+07	1.3022e+08	6.29862e+07	6.22638e+07	4.90469e+07	6.34575e+07
High	MS08_v1_0554	ID:23316285 Integration host factor subunit alpha (modular protein) [Beijerinckiaceae Ms08]	0	48	5	83	5	132	1.16209e+07	1.11445e+07	1.24777e+07	1.77203e+07	4.00126e+06	4.95857e+06	4.94222e+06	4.726e+06
High	MS08_v1_3206	ID:23318937 panC| Pantothenate synthetase [Beijerinckiaceae Ms08]	0	35	9	35	9	286	2.33168e+06	2.07557e+06	1.40027e+06	2.48558e+06	868177	806021	1.26339e+06	1.79484e+06
High	MS08_v1_0631	ID:23316362 conserved protein of unknown function [Beijerinckiaceae Ms08]	0	51	9	42	9	221	3.6176e+06	3.14254e+06	2.84476e+06	3.99327e+06	2.36621e+06	2.03615e+06	1.64951e+06	2.41434e+06
High	MS08_v1_1847	ID:23317578 cbbY| Protein CbbY [Beijerinckiaceae Ms08]	0	45	8	52	8	262	3.72529e+06	3.3256e+06	1.34651e+06	3.3461e+06	559080	1.02741e+06	1.31024e+06	850586
High	MS08_v1_2026	ID:23317757 aroE| Shikimate dehydrogenase [Beijerinckiaceae Ms08]	0	49	10	59	10	284	2.6014e+06	2.07071e+06	1.00643e+06	1.83669e+06	3.80985e+06	4.17247e+06	4.20711e+06	4.44818e+06
High	MS08_v1_3275	ID:23319006 Exodeoxyribonuclease III [Beijerinckiaceae Ms08]	0	36	10	85	10	258	3.42174e+06	4.51251e+06	3.6756e+06	7.15884e+06	6.84801e+06	1.21483e+07	7.93511e+06	1.52697e+07
High	MS08_v1_1694	ID:23317425 conserved protein of unknown function [Beijerinckiaceae Ms08]	0	52	5	181	5	88	2.1457e+07	2.16201e+07	1.75529e+07	2.4018e+07	2.16784e+07	2.26039e+07	3.61703e+07	2.29904e+07
High	MS08_v1_0823	ID:23316554 conserved protein of unknown function [Beijerinckiaceae Ms08]	0	51	5	80	5	136	3.11837e+06	3.63981e+06	1.07179e+06	2.51225e+06	3.21545e+06	3.76618e+06	3.56161e+06	2.46217e+06
High	MS08_v1_0499	ID:23316230 Preprotein translocase, SecG subunit [Beijerinckiaceae Ms08]	0	37	4	70	4	166	1.89761e+07	2.01295e+07	1.00288e+07	1.85341e+07	7.27411e+06	6.68229e+06	6.47832e+06	6.14828e+06
High	MS08_v1_3020	ID:23318751 Adenylate and Guanylate cyclase catalytic domain protein [Beijerinckiaceae Ms08]	0	30	10	41	10	449	1.2356e+06	1.21178e+06	1.01551e+06	1.97807e+06	2.60778e+06	2.64567e+06	2.94769e+06	2.00428e+06
High	MS08_v1_0434	ID:23316165 tatB| Sec-independent protein translocase protein TatB [Beijerinckiaceae Ms08]	0	31	6	106	6	192	6.67123e+06	6.50379e+06	3.56961e+06	4.94666e+06	7.01164e+06	1.04072e+07	8.81991e+06	9.84975e+06
High	MS08_v1_2234	ID:23317965 conserved protein of unknown function [Beijerinckiaceae Ms08]	0	46	6	23	6	196	1.96643e+06	1.67271e+06	1.7772e+06	4.20877e+06	695282	451853	1.0017e+06	418065
High	MS08_v1_0088	ID:23315819 infA| protein chain initiation factor IF-1 [Beijerinckiaceae Ms08]	0	67	4	47	4	72	7.31457e+06	9.91244e+06	1.00993e+07	8.68528e+06	5.00123e+06	7.17161e+06	7.83937e+06	6.81898e+06
High	MS08_v1_1730	ID:23317461 conserved protein of unknown function [Beijerinckiaceae Ms08]	0	37	9	84	9	313	1.97732e+06	1.5175e+06	2.17982e+06	1.9543e+06	5.75321e+06	5.54265e+06	6.05649e+06	5.97129e+06
High	MS08_v1_0830	ID:23316561 Anti-ECFsigma factor, ChrR [Beijerinckiaceae Ms08]	0	30	3	60	3	151	9.67831e+06	8.78689e+06	3.62531e+06	8.0758e+06	1.11031e+07	9.18877e+06	6.12565e+06	1.02429e+07
High	MS08_v1_0285	ID:23316016 ETC complex I subunit conserved region [Beijerinckiaceae Ms08]	0	67	6	82	6	101	6.07831e+06	4.72005e+06	5.13662e+06	1.0236e+07	3.3734e+06	2.96085e+06	3.1075e+06	3.11945e+06
High	MS08_v1_1494	ID:23317225 conserved protein of unknown function [Beijerinckiaceae Ms08]	0	40	5	75	5	134	3.24064e+06	3.12419e+06	1.34048e+06	2.45737e+06	1.80528e+07	2.14933e+07	4.21479e+07	2.23965e+07
High	MS08_v1_2359	ID:23318090 nrtB| Nitrate transport permease protein NrtB [Beijerinckiaceae Ms08]	0	35	9	33	9	303	6.30257e+06	5.39144e+06	1.97152e+06	3.50606e+06	80497.6	241381	139303	126624
High	MS08_v1_1563	ID:23317294 conserved protein of unknown function [Beijerinckiaceae Ms08]	0	22	4	61	4	232	2.71014e+06	3.26881e+06	2.52677e+06	2.6489e+06	4.25504e+06	5.74275e+06	6.92195e+06	5.99135e+06
High	MS08_v1_1244	ID:23316975 5,6-dimethylbenzimidazole synthase [Beijerinckiaceae Ms08]	0	51	8	29	8	219	2.09119e+06	1.88189e+06	5.1215e+06	2.00059e+06	1.77164e+06	1.40399e+06	862977	3.96144e+06
High	MS08_v1_0507	ID:23316238 moaC| molybdopterin biosynthesis, protein C [Beijerinckiaceae Ms08]	0	47	7	63	7	163	5.48793e+06	4.8176e+06	3.73973e+06	3.66877e+06	5.60071e+06	5.369e+06	7.32016e+06	5.8788e+06
High	MS08_v1_1639	ID:23317370 protein of unknown function [Beijerinckiaceae Ms08]	0	46	7	44	7	179	2.04708e+06	2.51274e+06	1.01248e+06	2.09266e+06	617218	807815	406198	475859
High	MS08_v1_3400	ID:23319131 conserved exported protein of unknown function [Beijerinckiaceae Ms08]	0	30	6	58	6	264	2.78377e+06	2.57016e+06	1.74545e+06	3.05527e+06	5.22342e+06	6.19344e+06	5.03612e+06	5.52778e+06
High	MS08_v1_0387	ID:23316118 BolA family protein [Beijerinckiaceae Ms08]	0	92	5	110	5	77	1.86766e+07	2.0544e+07	1.01043e+07	1.55064e+07	1.28216e+07	1.29558e+07	1.03132e+07	1.01594e+07
High	MS08_v1_0256	ID:23315987 Nucleotidyl transferase [Beijerinckiaceae Ms08]	0	39	6	36	6	241	1.89532e+06	1.69752e+06	401857	1.31411e+06	434438	964294	619606	411661
High	MS08_v1_3154	ID:23318885 protein of unknown function [Beijerinckiaceae Ms08]	0	58	7	44	7	130	2.97284e+06	3.12554e+06	2.80777e+06	3.44616e+06	1.14761e+06	1.66995e+06	1.29112e+06	1.60254e+06
High	MS08_v1_2399	ID:23318130 conserved protein of unknown function [Beijerinckiaceae Ms08]	0	42	7	52	7	139	5.03255e+06	3.51434e+06	5.47563e+06	6.1424e+06	425748	486461	636305	376612
High	MS08_v1_2902	ID:23318633 mraZ| Protein MraZ [Beijerinckiaceae Ms08]	0	51	8	111	8	164	4.39598e+06	3.96272e+06	2.87577e+06	5.27118e+06	3.93285e+06	4.31313e+06	4.19068e+06	4.52459e+06
High	MS08_v1_1126	ID:23316857 conserved exported protein of unknown function [Beijerinckiaceae Ms08]	0	33	4	114	4	116	1.39186e+07	1.15406e+07	1.24236e+07	1.40134e+07	1.88535e+08	1.83152e+08	1.88702e+08	1.82738e+08
High	MS08_v1_1149	ID:23316880 Extracellular solute-binding protein family 5 [Beijerinckiaceae Ms08]	0	24	14	67	14	547	1.34734e+06	1.58563e+06	822942	1.40795e+06	4.50857e+06	3.80209e+06	6.19049e+06	4.1045e+06
High	MS08_v1_2627	ID:23318358 conserved protein of unknown function [Beijerinckiaceae Ms08]	0	30	13	41	13	470	2.45638e+06	2.49435e+06	1.15074e+06	2.50992e+06	682762	626119	90692.9	632801
High	MS08_v1_2302	ID:23318033 purE| phosphoribosylaminoimidazole carboxylase, mutase subunit [Beijerinckiaceae Ms08]	0	38	4	37	4	165	7.599e+06	6.76899e+06	3.80263e+06	5.28335e+06	2.8571e+06	4.04939e+06	4.58105e+06	3.75258e+06
High	MS08_v1_2039	ID:23317770 hisB| Imidazoleglycerol-phosphate dehydratase [Beijerinckiaceae Ms08]	0	38	6	55	6	195	7.13036e+06	7.16728e+06	3.87704e+06	6.12472e+06	7.81909e+06	5.26532e+06	4.2367e+06	5.81909e+06
High	MS08_v1_0686	ID:23316417 Transcriptional regulator, TetR family [Beijerinckiaceae Ms08]	0	44	7	33	7	184	1.02769e+06	978702	273960	826243	359932	371478	329741	322899
High	MS08_v1_3245	ID:23318976 protein of unknown function [Beijerinckiaceae Ms08]	0	80	7	25	7	133	1.86987e+06	915101		4.37107e+06	467472	560319
High	MS08_v1_1424	ID:23317155 ABC transporter related protein [Beijerinckiaceae Ms08]	0	30	11	53	11	467	2.5619e+06	2.58751e+06	614945	2.20903e+06			25814.5	250448
High	MS08_v1_2361	ID:23318092 conserved protein of unknown function [Beijerinckiaceae Ms08]	0	26	9	58	9	376	3.03732e+06	3.27591e+06	916295	2.79216e+06	2.34509e+06	3.34879e+06	3.76164e+06	4.06442e+06
High	MS08_v1_0514	ID:23316245 phhA| Phenylalanine-4-hydroxylase [Beijerinckiaceae Ms08]	0	44	12	66	12	308	1.4803e+06	980145	2.18612e+06	1.68697e+06	4.55405e+06	6.58075e+06	5.78167e+06	6.79625e+06
High	MS08_v1_2160	ID:23317891 conserved protein of unknown function [Beijerinckiaceae Ms08]	0	38	9	55	9	280	3.48968e+06	3.39774e+06	2.43535e+06	3.14622e+06	2.29996e+06	2.93299e+06	2.16318e+06	2.3763e+06
High	MS08_v1_1156	ID:23316887 Sel1 domain protein repeat-containing protein [Beijerinckiaceae Ms08]	0	22	8	38	8	346	3.81916e+06	3.72864e+06	311722	3.6782e+06
High	MS08_v1_1195	ID:23316926 putative metal-dependent amidohydrolase (TAT secreted) [Beijerinckiaceae Ms08]	0	27	12	62	12	596	64806.3	66178.3		224592	3.16696e+06	3.31396e+06	3.37275e+06	2.52528e+06
High	MS08_v1_0278	ID:23316009 conserved protein of unknown function [Beijerinckiaceae Ms08]	0	33	10	37	10	338	2.13553e+06	2.18551e+06	620633	1.44117e+06	153179	216942	199764	109439
High	MS08_v1_2905	ID:23318636 Peptidoglycan glycosyltransferase [Beijerinckiaceae Ms08]	0	22	10	28	10	603	1.70325e+06	1.72392e+06	399973	1.90239e+06		49310.1
High	MS08_v1_0354	ID:23316085 Inositol monophosphatase [Beijerinckiaceae Ms08]	0	43	8	41	8	275	1.23142e+06	1.40421e+06	409225	984293	455307	505074	1.4567e+06	333678
High	MS08_v1_2027	ID:23317758 coaE| Dephospho-CoA kinase [Beijerinckiaceae Ms08]	0	42	7	60	7	198	2.55648e+06	2.3199e+06	1.59351e+06	2.49046e+06	3.08086e+06	2.44112e+06	2.44941e+06	2.03304e+06
High	MS08_v1_3099	ID:23318830 protein of unknown function [Beijerinckiaceae Ms08]	0	46	5	90	5	155	4.08402e+06	4.17103e+06	2.53135e+06	4.35313e+06	3.62256e+07	4.66366e+07	8.6826e+07	5.2186e+07
High	MS08_v1_2932	ID:23318663 folE| GTP cyclohydrolase 1 [Beijerinckiaceae Ms08]	0	56	11	54	11	211	2.63107e+06	2.41326e+06	1.41295e+06	2.35332e+06	230741	165828	522105	276715
High	MS08_v1_0173	ID:23315904 conserved protein of unknown function [Beijerinckiaceae Ms08]	0	29	6	40	6	277	1.55513e+06	1.32741e+06	253537	1.5269e+06	260657	563591	603347	376258
High	MS08_v1_2860	ID:23318591 speF| Ornithine decarboxylase, inducible [Beijerinckiaceae Ms08]	0	19	12	33	12	781	1.818e+06	1.86376e+06	369679	1.23269e+06	43970.6
High	MS08_v1_1570	ID:23317301 exported protein of unknown function [Beijerinckiaceae Ms08]	0	54	6	83	6	112	2.84074e+07	2.2862e+07	1.74071e+07	2.76923e+07	5.33044e+06	5.25025e+06	7.60183e+06	5.02843e+06
High	MS08_v1_0318	ID:23316049 YdjC family protein [Beijerinckiaceae Ms08]	0	33	9	51	9	291	2.44612e+06	2.464e+06	1.21763e+06	2.96772e+06	658919	661558	575466	292775
High	MS08_v1_1661	ID:23317392 conserved exported protein of unknown function [Beijerinckiaceae Ms08]	0	59	5	27	5	129	2.06399e+06	1.03291e+06	674175	2.87003e+06	3.33813e+06	3.18415e+06	9.36568e+06	3.65462e+06
High	MS08_v1_0510	ID:23316241 glpK| Glycerol kinase [Beijerinckiaceae Ms08]	0	26	11	98	11	497	494303	490535	912552	939117	4.23533e+06	4.951e+06	5.02161e+06	4.24402e+06
High	MS08_v1_3321	ID:23319052 conserved protein of unknown function [Beijerinckiaceae Ms08]	0	40	12	59	12	329	1.61446e+06	1.8165e+06	403305	1.67883e+06	2.76469e+06	2.88267e+06	2.21432e+06	3.41906e+06
High	MS08_v1_0449	ID:23316180 rplX| 50S ribosomal subunit protein L24 [Beijerinckiaceae Ms08]	0	48	6	129	6	105	4.85841e+07	4.84712e+07	3.33989e+07	4.5584e+07	3.19183e+07	3.71995e+07	3.60469e+07	3.52646e+07
High	MS08_v1_0124	ID:23315855 conserved protein of unknown function [Beijerinckiaceae Ms08]	0	31	7	23	7	243	965654	1.04745e+06	783972	1.29257e+06	99469.7		247869
High	MS08_v1_1146	ID:23316877 conserved protein of unknown function [Beijerinckiaceae Ms08]	0	57	5	73	5	88	1.39901e+06	1.86077e+06	1.14004e+06	2.23476e+06	1.52729e+07	1.21555e+07	1.93548e+07	1.39871e+07
High	MS08_v1_0148	ID:23315879 gcvPA| putative glycine dehydrogenase (decarboxylating) subunit 1 [Beijerinckiaceae Ms08]	0	28	10	37	10	448	1.19733e+06	1.58892e+06	985354	1.56492e+06	871621	773759	1.75068e+06	584018
High	MS08_v1_2034	ID:23317765 hisE| Phosphoribosyl-ATP pyrophosphatase [Beijerinckiaceae Ms08]	0	44	4	66	4	108	4.02854e+06	3.2674e+06	1.89438e+06	3.02596e+06	6.04241e+06	6.617e+06	4.73194e+06	9.13072e+06
High	MS08_v1_1554	ID:23317285 rimM| Ribosome maturation factor RimM [Beijerinckiaceae Ms08]	0	66	10	64	10	180	1.86404e+06	1.66572e+06	581513	1.8345e+06	2.10406e+06	3.60499e+06	5.1724e+06	4.02104e+06
High	MS08_v1_0855	ID:23316586 conserved protein of unknown function [Beijerinckiaceae Ms08]	0	60	8	67	8	141	1.92924e+06	2.41165e+06	1.42087e+06	2.00875e+06	5.21646e+06	5.83359e+06	6.23181e+06	6.40306e+06
High	MS08_v1_2318	ID:23318049 conserved protein of unknown function [Beijerinckiaceae Ms08]	0	23	8	43	8	424	2.95762e+06	3.48079e+06	1.99227e+06	2.6353e+06	857113	825666	747947	920965
High	MS08_v1_1176	ID:23316907 putative ATPase [Beijerinckiaceae Ms08]	0	16	15	215	15	1023	444528	401282	120950	537425	170159	103265	133736	117202
High	MS08_v1_1193	ID:23316924 yadG| putative transporter subunit: ATP-binding component of ABC superfamily [Beijerinckiaceae Ms08]	0	37	9	49	9	308	3.51329e+06	3.10948e+06	779113	1.6528e+06	78596.8	378700	277430	299021
High	MS08_v1_2537	ID:23318268 Cupin 2 conserved barrel domain protein [Beijerinckiaceae Ms08]	0	66	6	74	6	109	826070	869143	379750	975167	1.52216e+07	2.36923e+07	3.39683e+07	2.3539e+07
High	MS08_v1_3325	ID:23319056 N-acetylmuramoyl-L-alanine amidase [Beijerinckiaceae Ms08]	0	23	9	28	9	443	1.11953e+06	1.25777e+06	707290	1.16347e+06
High	MS08_v1_1226	ID:23316957 conserved protein of unknown function [Beijerinckiaceae Ms08]	0	41	9	48	9	371	2.89608e+06	2.76593e+06	1.21681e+06	2.20285e+06	1.4083e+06	2.27799e+06	1.71763e+06	863427
High	MS08_v1_3016	ID:23318747 Diacylglycerol kinase catalytic region [Beijerinckiaceae Ms08]	0	37	9	57	9	329	1.76773e+06	1.63453e+06	838893	2.20534e+06	1.82142e+06	1.98576e+06	4.53547e+06	2.45023e+06
High	MS08_v1_0211	ID:23315942 hypE| carbamoyl phosphate phosphatase, hydrogenase 3 maturation protein [Beijerinckiaceae Ms08]	0	33	10	58	10	355	363678	420805	210749	1.10477e+06	7.24352e+06	8.70757e+06	1.117e+07	9.81552e+06
High	MS08_v1_1783	ID:23317514 Transcriptional regulator, LuxR family [Beijerinckiaceae Ms08]	0	33	6	22	6	228	941872	795462	357403	671530	133369	154613	699931	280791
High	MS08_v1_1575	ID:23317306 conserved protein of unknown function [Beijerinckiaceae Ms08]	0	58	8	89	8	155	2.8926e+06	1.57438e+06	2.28797e+06	3.20285e+06	5.67005e+06	5.31606e+06	7.24188e+06	7.1332e+06
High	MS08_v1_0672	ID:23316403 Preprotein translocase subunit SecY [Beijerinckiaceae Ms08]	0	42	5	84	5	130	5.73128e+06	5.72825e+06	2.41162e+06	4.33986e+06	2.38606e+07	3.65508e+07	5.33227e+07	3.77849e+07
High	MS08_v1_2482	ID:23318213 conserved protein of unknown function [Beijerinckiaceae Ms08]	0	54	8	33	8	169	5.15215e+06	5.68967e+06		400343	126656	230926	322321	144679
High	MS08_v1_0829	ID:23316560 conserved protein of unknown function [Beijerinckiaceae Ms08]	0	41	6	70	6	229	8.58621e+06	7.76944e+06	4.80295e+06	6.41206e+06	2.75114e+06	3.10189e+06	3.15262e+06	3.85672e+06
High	MS08_v1_0522	ID:23316253 maiA| putative maleylacetoacetate isomerase [Beijerinckiaceae Ms08]	0	58	9	63	9	196	1.20167e+06	580027	601012	1.17833e+06	567764	1.89405e+06	1.31947e+06	1.30158e+06
High	MS08_v1_0866	ID:23316597 rtcB| tRNA-splicing ligase RtcB [Beijerinckiaceae Ms08]	0	31	13	50	13	490	531552	397949	510103	566064	2.36086e+06	3.26163e+06	3.08037e+06	3.21935e+06
High	MS08_v1_1658	ID:23317389 Methyltransferase type 12 [Beijerinckiaceae Ms08]	0	46	10	67	10	219	2.08764e+06	1.48827e+06	1.14991e+06	1.46868e+06	2.35781e+06	1.30983e+06	1.49252e+06	1.62209e+06
High	MS08_v1_2220	ID:23317951 conserved exported protein of unknown function [Beijerinckiaceae Ms08]	0	54	6	47	6	98	3.82192e+06	4.27275e+06	6.1444e+06	6.13105e+06	528290	543490	722535	320936
High	MS08_v1_2281	ID:23318012 NADH-ubiquinone oxidoreductase chain 49kDa [Beijerinckiaceae Ms08]	0	27	12	72	12	514	240470	408505	99433.9	404769	4.67157e+06	3.93059e+06	5.15459e+06	3.99448e+06
High	MS08_v1_1297	ID:23317028 DoxX family protein [Beijerinckiaceae Ms08]	0	40	5	56	5	164	7.2415e+06	6.88007e+06	3.67107e+06	5.2792e+06	8.07384e+06	6.05381e+06	1.19283e+07	5.80418e+06
High	MS08_v1_2488	ID:23318219 recR| gap repair protein [Beijerinckiaceae Ms08]	0	63	11	74	11	201	2.03183e+06	2.04876e+06	627592	2.46705e+06	6.7097e+06	7.32547e+06	1.1795e+07	1.02261e+07
High	MS08_v1_1218	ID:23316949 conserved protein of unknown function [Beijerinckiaceae Ms08]	0	46	7	49	7	213	3.44681e+06	3.22744e+06	1.32716e+06	2.87847e+06	154503		377701
High	MS08_v1_2351	ID:23318082 bioA| 7,8-diaminopelargonic acid synthase, PLP-dependent [Beijerinckiaceae Ms08]	0	25	10	37	10	425	1.28969e+06	1.41765e+06	365995	981549	1.54847e+06	1.56898e+06	1.24663e+06	1.03597e+06
High	MS08_v1_1763	ID:23317494 cobH| Precorrin-8X methylmutase [Beijerinckiaceae Ms08]	0	35	8	76	8	215	3.51868e+06	3.9596e+06	2.75289e+06	4.87681e+06	2.34592e+06	3.16616e+06	3.42983e+06	2.74051e+06
High	MS08_v1_0317	ID:23316048 Short-chain dehydrogenase/reductase SDR [Beijerinckiaceae Ms08]	0	39	8	54	8	257	3.82583e+06	3.64733e+06	2.50734e+06	2.89296e+06	3.88259e+06	4.13804e+06	4.40388e+06	5.13155e+06
High	MS08_v1_1920	ID:23317651 ctrA| Cell cycle response regulator CtrA [Beijerinckiaceae Ms08]	0	37	7	32	7	233	1.79592e+06	1.57508e+06	1.0146e+06	1.88629e+06
High	MS08_v1_2867	ID:23318598 glgA| glycogen synthase [Beijerinckiaceae Ms08]	0	23	9	31	9	487	977180	469082	595554	896998	610087	687783	400645	282187
High	MS08_v1_0877	ID:23316608 Protein tyrosine phosphatase [Beijerinckiaceae Ms08]	0	56	8	98	8	172	1.77032e+06	1.89457e+06	1.99579e+06	1.76981e+06	1.10269e+06	1.45361e+06	1.42948e+06	1.20267e+06
High	MS08_v1_1312	ID:23317043 msrA| methionine sulfoxide reductase A [Beijerinckiaceae Ms08]	0	48	6	37	6	219	2.78916e+06	2.35434e+06	609816	1.69308e+06	3.79557e+06	5.40788e+06	8.76527e+06	6.85126e+06
High	MS08_v1_1422	ID:23317153 conserved protein of unknown function [Beijerinckiaceae Ms08]	0	35	4	87	4	125	4.15786e+06	5.46261e+06	3.4525e+06	4.97687e+06	1.74352e+07	9.6763e+06	1.44697e+07	1.15271e+07
High	MS08_v1_2188	ID:23317919 conserved protein of unknown function [Beijerinckiaceae Ms08]	0	24	5	27	4	299	1.17318e+06	1.11161e+06		606740
High	MS08_v1_3109	ID:23318840 Integral membrane sensor signal transduction histidine kinase [Beijerinckiaceae Ms08]	0	30	14	56	14	479	1.11949e+06	1.17153e+06	248064	985624	4.9248e+06	4.71001e+06	3.82456e+06	4.05882e+06
High	MS08_v1_3032	ID:23318763 putative integral membrane protein [Beijerinckiaceae Ms08]	0	23	6	123	6	277	1.38056e+07	1.76912e+07	1.95051e+07	2.90298e+07	1.2134e+07	8.41648e+06	1.14507e+07	9.15223e+06
High	MS08_v1_2141	ID:23317872 pmoA| Particulate methane monooxygenase beta subunit [Beijerinckiaceae Ms08]	0	6	3	624	3	288	6.24235e+08	7.13167e+08	8.21929e+08	9.93368e+08	2.6776e+08	1.92294e+08	2.13197e+08	1.61314e+08
High	MS08_v1_2085	ID:23317816 Integral membrane sensor signal transduction histidine kinase [Beijerinckiaceae Ms08]	0	25	11	31	11	455	1.80076e+06	1.77e+06	245178	1.6352e+06	810866	742806	381349	1.0873e+06
High	MS08_v1_3153	ID:23318884 FAD dependent oxidoreductase [Beijerinckiaceae Ms08]	0	24	12	23	12	652	317044	421693	189693	526236	262644	180274	536843	277304
High	MS08_v1_0695	ID:23316426 N-acetylglucosamine-6-phosphate deacetylase [Beijerinckiaceae Ms08]	0	29	10	36	10	431	1.29589e+06	1.28167e+06	1.26569e+06	1.1852e+06	4.19024e+06	4.43282e+06	2.88342e+06	5.23888e+06
High	MS08_v1_3094	ID:23318825 Acyl dehydratase [Beijerinckiaceae Ms08]	0	36	5	33	5	163	1.14255e+07	1.06193e+07	4.85817e+06	7.74404e+06	3.12729e+06	2.39849e+06	4.93566e+06	3.5723e+06
High	MS08_v1_1908	ID:23317639 Short-chain dehydrogenase/reductase SDR [Beijerinckiaceae Ms08]	0	45	10	48	10	290	421888	315550		650479	6.49248e+06	6.56727e+06	9.43582e+06	7.62024e+06
High	MS08_v1_2866	ID:23318597 glgC| glucose-1-phosphate adenylyltransferase [Beijerinckiaceae Ms08]	0	34	12	66	12	418	1.70914e+06	996384	501284	1.43901e+06	5.64331e+06	4.89104e+06	5.61426e+06	5.6522e+06
High	MS08_v1_1996	ID:23317727 conserved protein of unknown function [Beijerinckiaceae Ms08]	0	32	7	38	7	274	2.47645e+06	2.36736e+06	1.32159e+06	1678849	2.42662e+06	1.81237e+06	2.34971e+06	1.44141e+06
High	MS08_v1_1782	ID:23317513 conserved protein of unknown function [Beijerinckiaceae Ms08]	0	86	4	46	4	79	4.61201e+06	4.0439e+06	4.41294e+06	4.04862e+06	3.86508e+06	3.40954e+06	4.67253e+06	3.89981e+06
High	MS08_v1_1725	ID:23317456 NMT1/THI5 like domain protein [Beijerinckiaceae Ms08]	0	28	9	37	9	332	1.33906e+06	1.02591e+06	738031	1.52987e+06	1.39719e+06	1.26011e+06	1.58671e+06	1.06499e+06
High	MS08_v1_1797	ID:23317528 cas1| CRISPR-associated endonuclease Cas1 2 [Beijerinckiaceae Ms08]	0	27	9	51	9	344	5.25434e+06	5.1178e+06	1.50894e+06	4.79309e+06	2.11039e+06	2.11034e+06	2.43158e+06	1.97419e+06
High	MS08_v1_0523	ID:23316254 Transcriptional regulator, XRE family [Beijerinckiaceae Ms08]	0	39	7	55	7	205	2.9131e+06	2.9936e+06	1.97243e+06	2.42183e+06	1.14537e+06	1.28033e+06	1.1346e+06	972780
High	MS08_v1_0061	ID:23315792 thiE| thiamin phosphate synthase (thiamin phosphate pyrophosphorylase) [Beijerinckiaceae Ms08]	0	44	6	43	6	209	1.7925e+06	1.57852e+06	529952	1.39504e+06	1.09486e+06	768477	2.10771e+06	1.13357e+06
High	MS08_v1_1518	ID:23317249 putative glutathione S-transferase [Beijerinckiaceae Ms08]	0	46	9	98	9	209	1.34124e+07	9.98877e+06	1.24608e+08	1.05877e+07	3.36175e+07	2.78019e+07	3.37872e+07	4.62618e+07
High	MS08_v1_2336	ID:23318067 RDD domain containing protein [Beijerinckiaceae Ms08]	0	30	4	39	4	155	1.73131e+06	1.32037e+06	147402	900011	3.62686e+06	3.29284e+06	7.36774e+06	3.79195e+06
High	MS08_v1_0292	ID:23316023 ycfH| putative metallodependent hydrolase [Beijerinckiaceae Ms08]	0	34	7	47	7	266	1.19686e+06	1.05454e+06	551968	1.57977e+06	789300	1.69107e+06	1.02327e+06	1.69713e+06
High	MS08_v1_1298	ID:23317029 exported protein of unknown function [Beijerinckiaceae Ms08]	0	52	3	79	3	77	2.51989e+07	2.46949e+07	2.17734e+07	1.80166e+07	1.69458e+08	9.71897e+07	3.44298e+07	8.89654e+07
High	MS08_v1_2886	ID:23318617 exbD| membrane spanning protein in TonB-ExbB-ExbD complex [Beijerinckiaceae Ms08]	0	27	3	28	3	162	1.12832e+07	9.95748e+06	1.9069e+06	3.72889e+06			1.35796e+06
High	MS08_v1_0808	ID:23316539 putative cold shock protein y4cH [Beijerinckiaceae Ms08]	0	63	4	68	4	70	2.78989e+06	2.42991e+06	2.28345e+06	2.82697e+06	1.88404e+07	1.59932e+07	1.24426e+07	1.35347e+07
High	MS08_v1_1456	ID:23317187 ispE| 4-diphosphocytidyl-2-C-methyl-D-erythritol kinase [Beijerinckiaceae Ms08]	0	37	10	28	10	300	940594	1.11753e+06	190744	1.04594e+06	1.79422e+06	1.73224e+06	1.97795e+06	1.86078e+06
High	MS08_v1_3070	ID:23318801 cysH| Phosphoadenosine phosphosulfate reductase [Beijerinckiaceae Ms08]	0	53	10	30	10	243	1.53789e+06	1.62874e+06	778874	1.84995e+06
High	MS08_v1_3411	ID:23319142 Methyltransferase, UbiE/COQ5 family [Beijerinckiaceae Ms08]	0	36	8	24	8	255	3.35447e+06	3.6776e+06	522455	2.55944e+06		75075.8	67521.2
High	MS08_v1_3446	ID:23319177 conserved protein of unknown function [Beijerinckiaceae Ms08]	0	49	6	52	6	146	3.29363e+06	3.48499e+06	1.26024e+06	3.70483e+06	3.33201e+06	3.9623e+06	5.65756e+06	4.92463e+06
High	MS08_v1_0790	ID:23316521 conserved protein of unknown function [Beijerinckiaceae Ms08]	0	64	7	63	7	137	5.07719e+06	4.36724e+06	3.74348e+06	6.47894e+06	6.21892e+06	9.00347e+06	7.79269e+06	8.00041e+06
High	MS08_v1_2485	ID:23318216 conserved protein of unknown function [Beijerinckiaceae Ms08]	0	21	8	33	8	389	1.59506e+06	1.7199e+06	507899	1.4398e+06			367923	353677
High	MS08_v1_1242	ID:23316973 pth| Peptidyl-tRNA hydrolase [Beijerinckiaceae Ms08]	0	57	10	49	10	196	3.3853e+06	2.72162e+06	1.04823e+06	3.1041e+06	2.07967e+06	3.09098e+06	3.84765e+06	3.1355e+06
High	MS08_v1_3460	ID:23319191 Iron/ascorbate-dependent oxidoreductase [Beijerinckiaceae Ms08]	0	19	5	26	5	334	1.51334e+06	538683	221357	1.44332e+06	294241			399090
High	MS08_v1_2405	ID:23318136 conserved protein of unknown function [Beijerinckiaceae Ms08]	0	54	8	44	8	190	676253	869843	1.97294e+06	1.58994e+06	2.76941e+06	3.27343e+06	1.27111e+06	3.90307e+06
High	MS08_v1_1744	ID:23317475 rpmA| 50S ribosomal protein L27 [Beijerinckiaceae Ms08]	0	56	3	46	3	91	8.08242e+06	8.11404e+06	8.30177e+06	8.65156e+06	1.0419e+06	2.78626e+06	1.05495e+06	2.1599e+06
High	MS08_v1_3189	ID:23318920 putative Tetratricopeptide TPR_2 repeat protein [Beijerinckiaceae Ms08]	0	27	10	52	10	444	1.74437e+06	1.84373e+06	202528	2.6166e+06	942635	2.24411e+06	4.16947e+06	2.2888e+06
High	MS08_v1_1716	ID:23317447 conserved protein of unknown function [Beijerinckiaceae Ms08]	0	32	6	62	6	232	3.94795e+06	3.41685e+06	2.51733e+06	3.39751e+06	2.06839e+06	2.70701e+06	2.90364e+06	2.47654e+06
High	MS08_v1_1671	ID:23317402 putative Methyltransferase [Beijerinckiaceae Ms08]	0	30	9	34	9	315	3.16775e+06	3.7121e+06	1.7635e+06	3.38544e+06	489011	514769	394842	458710
High	MS08_v1_2524	ID:23318255 protein of unknown function [Beijerinckiaceae Ms08]	0	46	3	39	3	90	7.51857e+06	7.39957e+06	9.57719e+06	8.36797e+06	3.66576e+06	4.69418e+06	2.83298e+06	3.98852e+06
High	MS08_v1_0262	ID:23315993 metX| Homoserine O-acetyltransferase [Beijerinckiaceae Ms08]	0	23	8	30	8	397	1.60922e+06	2.27226e+06	680062	1.99992e+06	656952	341070	556870	1.12596e+06
High	MS08_v1_1928	ID:23317659 ybaL| putative monovalent cation:proton antiporter (CPA2 family) [Beijerinckiaceae Ms08]	0	15	7	43	7	558	1.49122e+06	1.7346e+06	323392	1468871	554039	727017	988105	304301
High	MS08_v1_3457	ID:23319188 conserved protein of unknown function [Beijerinckiaceae Ms08]	0	40	6	25	6	208	3.44187e+06	3.0364e+06	1.47392e+06	2.46181e+06	699809	752410	845262	479415
High	MS08_v1_1463	ID:23317194 putative Glycosyl hydrolase (BNR repeat) [Beijerinckiaceae Ms08]	0	27	8	39	8	405	1.44098e+06	1.03474e+06	430460	1.28397e+06	676032	704400	975603	690697
High	MS08_v1_1935	ID:23317666 MaoC domain protein dehydratase [Beijerinckiaceae Ms08]	0	68	7	31	7	148	2.85897e+06	2.62129e+06	8.37753e+06	3.10251e+06	4.11083e+06	1.31263e+06	5.58887e+06	1.07416e+07
High	MS08_v1_1239	ID:23316970 exported protein of unknown function [Beijerinckiaceae Ms08]	0	30	7	26	7	274	2.51829e+06	1.91855e+06	374413	1.70349e+06	167113	366084	1.26802e+06	212046
High	MS08_v1_0571	ID:23316302 conserved protein of unknown function [Beijerinckiaceae Ms08]	0	41	7	41	7	184	3.60393e+06	3.36711e+06	609185	2.33635e+06	1.78255e+06	1.79709e+06	1.50261e+06	1.00125e+06
High	MS08_v1_2406	ID:23318137 ptsN| Nitrogen regulatory protein [Beijerinckiaceae Ms08]	0	43	8	43	8	187	5.19946e+06	5.03173e+06	2.92761e+06	5.5781e+06	3.09595e+06	3.69262e+06	3.91591e+06	3.54485e+06
High	MS08_v1_1523	ID:23317254 conserved protein of unknown function [Beijerinckiaceae Ms08]	0	38	4	220	4	78	1.0642e+07	2.06638e+07	1.60783e+07	2.20773e+07	6.04455e+08	3.03337e+08	2.7701e+08	1.6337e+08
High	MS08_v1_1712	ID:23317443 pqqD| Coenzyme PQQ synthesis protein D [Beijerinckiaceae Ms08]	0	44	4	56	4	95	3.77487e+06	3.79336e+06	2.35931e+06	4.21246e+06	7.68567e+06	6.48266e+06	7.75412e+06	6.80442e+06
High	MS08_v1_1832	ID:23317563 conserved protein of unknown function [Beijerinckiaceae Ms08]	0	40	10	65	10	300	197200	272037		503650	5.54614e+06	5.41518e+06	2.50878e+07	7.11005e+06
High	MS08_v1_0183	ID:23315914 protein of unknown function [Beijerinckiaceae Ms08]	0	24	13	37	13	577	937432	1.28163e+06	587731	1.80227e+06	110798
High	MS08_v1_3217	ID:23318948 protein of unknown function [Beijerinckiaceae Ms08]	0	39	11	43	11	358	1.81339e+06	2.20408e+06	313788	2.04903e+06	455960	520369	528735	416327
High	MS08_v1_1657	ID:23317388 NLP/P60 protein [Beijerinckiaceae Ms08]	0	33	8	51	8	283	1.52145e+06	1.46515e+06	780114	1.59235e+06	1.13114e+06	1.3667e+06	2.05325e+06	1.96133e+06
High	MS08_v1_2092	ID:23317823 thiD| Hydroxymethylpyrimidine/phosphomethylpyrimidine kinase [Beijerinckiaceae Ms08]	0	43	7	63	7	265	851005	796472	476940	649847	2.07274e+06	2.39461e+06	2.23329e+06	2.40493e+06
High	MS08_v1_3272	ID:23319003 Sel1 domain protein repeat-containing protein [Beijerinckiaceae Ms08]	0	24	7	30	7	279	914925	1.14913e+06	899919	1.2818e+06	504880	664280	891185	786165
High	MS08_v1_2826	ID:23318557 conserved exported protein of unknown function [Beijerinckiaceae Ms08]	0	31	5	40	5	185	5.7456e+06	4.59772e+06	2.52171e+06	5.29321e+06	1.81539e+06	4.06534e+06	1.93838e+06	3.25438e+06
High	MS08_v1_0346	ID:23316077 conserved protein of unknown function [Beijerinckiaceae Ms08]	0	72	8	100	8	131	2.32747e+07	2.00282e+07	1.26431e+08	2.35195e+07	1.96967e+07	1.93029e+07	1.88107e+07	2.6438e+07
High	MS08_v1_0563	ID:23316294 nusB| N utilization substance protein B homolog [Beijerinckiaceae Ms08]	0	43	6	33	6	156	1.44765e+06	1.56334e+06	418227	1.30109e+06	140460	166373	219917
High	MS08_v1_2814	ID:23318545 protein of unknown function [Beijerinckiaceae Ms08]	0	92	5	88	5	63	1.74255e+06	1.68098e+06	1.11534e+06	1.35704e+06	1.42761e+06	1.52523e+06	3.43942e+06	2.5026e+06
High	MS08_v1_2894	ID:23318625 conserved protein of unknown function [Beijerinckiaceae Ms08]	0	42	6	53	6	162	3.2766e+06	3.33157e+06	1.43556e+06	3.27013e+06	3.50045e+06	3.42927e+06	4.97871e+06	4.00487e+06
High	MS08_v1_1983	ID:23317714 protein of unknown function [Beijerinckiaceae Ms08]	0	22	3	35	3	203	1.03197e+07	6.90971e+06	4.69153e+06	7.80277e+06	4.3235e+06	3.27597e+06	3.71147e+06	3.97144e+06
High	MS08_v1_0327	ID:23316058 4-oxalocrotonate tautomerase [Beijerinckiaceae Ms08]	0	67	7	56	7	126	2.67875e+06	2.21279e+06	1.04678e+06	3.79811e+06	1.81447e+06	2.93128e+06	3.67217e+06	2.924e+06
High	MS08_v1_3469	ID:23319200 Hibch| 3-hydroxyisobutyryl-CoA hydrolase, mitochondrial [Beijerinckiaceae Ms08]	0	33	11	56	11	355	1.69013e+06	1.51327e+06	764852	1.25495e+06	2.1026e+06	2.71715e+06	2.68446e+06	2.43901e+06
High	MS08_v1_0134	ID:23315865 Uncharacterized zinc protease RF_0338 [Beijerinckiaceae Ms08]	0	27	8	41	8	421	719356	918332	302793	952357	2.11058e+06	2.33955e+06	3.29582e+06	2.64766e+06
High	MS08_v1_3472	ID:23319203 Rhomboid family protein [Beijerinckiaceae Ms08]	0	20	4	21	4	276	2.20729e+06	1.80669e+06	1.29323e+06	1.58513e+06	932283	990463	1.01029e+06	409061
High	MS08_v1_2791	ID:23318522 Biotin/acetyl-CoA-carboxylase ligase [Beijerinckiaceae Ms08]	0	37	6	18	6	252	302071	239064		524395	37349.9	49724	76040.4
High	MS08_v1_2444	ID:23318175 Hopanoid biosynthesis associated radical SAM protein HpnH [Beijerinckiaceae Ms08]	0	27	8	35	8	382	2.97996e+06	2.77327e+06	1.83509e+06	2.73302e+06			46141.7
High	MS08_v1_1960	ID:23317691 conserved protein of unknown function [Beijerinckiaceae Ms08]	0	38	9	28	9	260	254394	834207	72513.6	698542	83919.3	114040	138839	343477
High	MS08_v1_2362	ID:23318093 Response regulator receiver and ANTAR domain protein [Beijerinckiaceae Ms08]	0	35	6	25	6	194	758571	716662	649086	616912	225808	216502	306617	247325
High	MS08_v1_1674	ID:23317405 conserved protein of unknown function [Beijerinckiaceae Ms08]	0	39	6	73	6	184	2.60157e+06	2.51058e+06	958518	3.13452e+06	4.10078e+06	5.1578e+06	6.88512e+06	6.21825e+06
High	MS08_v1_0775	ID:23316506 UBA/THIF-type NAD/FAD binding protein [Beijerinckiaceae Ms08]	0	46	8	30	8	263	665343	904045	358739	486983	1.99729e+06	3.24547e+06	4.52089e+06	2.42678e+06
High	MS08_v1_0754	ID:23316485 Colicin V production protein [Beijerinckiaceae Ms08]	0	32	4	29	4	195	3.84266e+06	4.95107e+06	3.63354e+06	8.88007e+06	988969	1.1307e+06	1.07927e+06	588901
High	MS08_v1_3430	ID:23319161 divK| Polar-differentiation response regulator DivK [Beijerinckiaceae Ms08]	0	41	4	34	4	123	5.24736e+06	5.38602e+06	3.25183e+06	4.20971e+06	966165	1.28944e+06	629299	1.04393e+06
High	MS08_v1_0917	ID:23316648 Integral membrane sensor signal transduction histidine kinase [Beijerinckiaceae Ms08]	0	22	10	73	10	490	2.10555e+06	2.03392e+06	1.27264e+06	2.39686e+06	2.46142e+06	2.18196e+06	6.3792e+06	3.00765e+06
High	MS08_v1_0166	ID:23315897 Aspartate/glutamate/uridylate kinase [Beijerinckiaceae Ms08]	0	26	4	16	4	217	652418	685967	83223.1	609674
High	MS08_v1_1319	ID:23317050 yehX| putative transporter subunit: ATP-binding component of ABC superfamily transporter [Beijerinckiaceae Ms08]	0	25	7	47	7	311	1.57142e+06	1.50361e+06	951596	1.53508e+06	2.03508e+06	1.77376e+06	2.31684e+06	2.42856e+06
High	MS08_v1_3342	ID:23319073 Glycoside hydrolase family 25 [Beijerinckiaceae Ms08]	0	27	6	45	6	265	957151	1.12584e+06	1.03336e+06	2.18673e+06	1.90071e+06	2.41002e+06	1.11678e+06	1.33038e+06
High	MS08_v1_2316	ID:23318047 Glycoside hydrolase family 3 domain protein [Beijerinckiaceae Ms08]	0	17	11	42	11	716	805292	868474	151012	700805	105385	270200	108368	77102.3
High	MS08_v1_1222	ID:23316953 GCN5-related N-acetyltransferase [Beijerinckiaceae Ms08]	0	46	6	31	6	176	1.3148e+06	695669		1.06505e+06	1.26728e+06	2.22034e+06	3.24957e+06	1.18529e+06
High	MS08_v1_1022	ID:23316753 protein of unknown function [Beijerinckiaceae Ms08]	0	14	9	20	9	847	1.29123e+06	1.08983e+06	178779	578141	62520.7
High	MS08_v1_2271	ID:23318002 Molybdopterin binding domain protein [Beijerinckiaceae Ms08]	0	25	5	57	5	247	3.03385e+06	3.52231e+06	3.2063e+06	2.4701e+06	6.06176e+06	6.13773e+06	8.05014e+06	7.24243e+06
High	MS08_v1_1277	ID:23317008 conserved protein of unknown function [Beijerinckiaceae Ms08]	0	31	9	26	9	347	997953	1.09136e+06	383416	1.06555e+06	57313.3	130519	128048	133882
High	MS08_v1_1438	ID:23317169 mgtA| magnesium transporter [Beijerinckiaceae Ms08]	0	18	13	35	13	887	464766	768484	66303.4	776891	371008	301847	152041	324177
High	MS08_v1_0383	ID:23316114 Phosphoribosylformylglycinamidine synthase, purS protein [Beijerinckiaceae Ms08]	0	53	4	73	4	79	6.02496e+06	5.73239e+06	3.01867e+06	4.16702e+06	7.2679e+06	4.11513e+06	4.55445e+06	4.23023e+06
High	MS08_v1_2391	ID:23318122 conserved exported protein of unknown function [Beijerinckiaceae Ms08]	0	35	2	79	2	96	1.372e+07	1.10989e+07	8.70056e+06	9.34466e+06	2.20658e+07	2.78204e+07	1.74688e+07	2.29199e+07
High	MS08_v1_0723	ID:23316454 trmFO| Methylenetetrahydrofolate--tRNA-(uracil-5-)-methyltransferase TrmFO [Beijerinckiaceae Ms08]	0	20	9	30	9	479	2.41918e+06	2.42343e+06	1.03091e+06	1.77637e+06	1.03657e+06	1.16527e+06	1.4448e+06	1.28084e+06
High	MS08_v1_2132	ID:23317863 fdxA| Ferredoxin-2 [Beijerinckiaceae Ms08]	0	32	3	47	3	112	1.51073e+06	1.34719e+06	2.25458e+06	1.46429e+06	1.82818e+06	2.37164e+06	3.2714e+06	2.0333e+06
High	MS08_v1_1369	ID:23317100 rsfS| Ribosomal silencing factor RsfS [Beijerinckiaceae Ms08]	0	35	5	49	5	162	592095	1.32662e+06		1.10291e+06			51120.9
High	MS08_v1_2081	ID:23317812 Thioesterase superfamily protein [Beijerinckiaceae Ms08]	0	53	8	58	8	162	2.32184e+06	2.02015e+06	2.65031e+06	1.92385e+06	1.79379e+06	1.8642e+06	1.94148e+06	1.89403e+06
High	MS08_v1_2785	ID:23318516 nuoI| NADH-quinone oxidoreductase subunit I [Beijerinckiaceae Ms08]	0	25	4	60	4	162	6.72806e+06	6.63783e+06	4.23654e+06	8.73025e+06	2.51212e+06	3.98476e+06	3.03829e+06	2.9758e+06
High	MS08_v1_2404	ID:23318135 rpoN| RNA polymerase sigma-54 factor [Beijerinckiaceae Ms08]	0	24	10	48	10	516	870448	748289	378416	1.06126e+06	1.09429e+06	922696	826642	784693
High	MS08_v1_2962	ID:23318693 phoP| DNA-binding response regulator in two-component regulatory system with PhoQ [Beijerinckiaceae Ms08]	0	51	10	39	10	240	607733	760476	528383	1.57812e+06	1.02226e+06	1.0451e+06	536984	1.13701e+06
High	MS08_v1_0298	ID:23316029 hfq| RNA-binding protein Hfq [Beijerinckiaceae Ms08]	0	61	3	32	3	85	4.55779e+06	3.71151e+06	2.54645e+06	4.8212e+06	4.38899e+06	2.33026e+06	3.89058e+06	3.76785e+06
High	MS08_v1_2480	ID:23318211 exported protein of unknown function [Beijerinckiaceae Ms08]	0	48	5	60	5	107	4.30917e+06	3.39908e+06	2.67685e+06	4.08748e+06	3.41948e+07	5.95753e+07	4.69797e+07	3.34198e+07
High	MS08_v1_1633	ID:23317364 conserved protein of unknown function [Beijerinckiaceae Ms08]	0	40	9	60	9	279	226739	252293			1.02649e+07	1.13547e+07	1.38092e+07	1.32634e+07
High	MS08_v1_1878	ID:23317609 Cyclic nucleotide-binding protein [Beijerinckiaceae Ms08]	0	54	7	45	7	158	2.01395e+06	1.46186e+06	1.90906e+06	2.76495e+06	337819	499327	948150	449911
[truncated: 1,000 more rows]

## Sheet: S7 -Comparative proteomics SV97
Proteome Discoverer 3.0 output of Methylocystis rosea SV97 proteome data
[truncated: 2,148 more rows]

[truncated: 9 more sheets: S8 - Comparative proteomics NE2, S9 - Specific affinity, S10 - Putative CODH NE2, S11 - Putative CODH SV97, S12 - Top10prot_MG08, S13 - Top10prot_NE2, S14 - Top10prot_SV97, S15 - at% 15N enrichment, S16 - at% 15N control]
